# Supplementary material for: Retrophylogenomics Place Tarsiers on the Evolutionary Branch of Anthropoids
Source: PubMed Central journal article supplement — Sci Rep. 2013 Apr 30;3:1756. doi: 10.1038/srep01756 (PMC3639448; doi:10.1038/srep01756), 2013-04-30
Supplement: srep01756-s1.pdf [file srep01756-s1.pdf]

# Supplementary Information

## **Retrophylogenomics Place Tarsiers on the Evolutionary Branch of Anthropoids**

Gerrit Hartig<sup>1,2\*</sup>, Gennady Churakov<sup>1\*</sup>, Wesley Warren<sup>3</sup>, Jürgen Brosius<sup>1</sup>, Wojciech Makołowski<sup>2</sup> & Jürgen Schmitz<sup>1</sup>

<sup>1</sup>Institute of Experimental Pathology (ZMBE), University of Münster, 48149 Münster, Germany

<sup>2</sup>Institute of Bioinformatics, Faculty of Medicine, University of Münster, 48149 Münster, Germany

<sup>3</sup>Genome Sequencing Center, Washington University School of Medicine, 63108 Missouri, USA

\*These authors contributed equally to this work

Correspondence and requests for materials should be addressed to J.S. ([jueschm@uni-muenster.de](mailto:jueschm@uni-muenster.de))

**Supplementary Table 1**

Presence/absence state (+/-) of phylogenetically informative retroposon insertions and genome-coordinates for human (hg19) for Alu SINES (A), LINES (B) and LTR (C) elements. The subfamily affiliation of elements is given in the third column.

Among the new 19 diagnostic Alu insertions were 3 dimeric Alu elements of the subfamily Sx, 1 of the subfamily Jb, and 15 monomeric elements (12X FLAMs or SP-D; 1X FRAM; 2X FAM or PB1).

Diagnostic LINES were from the subfamily L1PB4, diagnostic LTRs divide in 62 MSTB and one MSTC elements. Alu/LINE/LTR = element subfamily, Marker = name of sequence, Chr = chromosome, d = deletion,

? = no alignable sequence information, +Ins = additional insertion, ns = no sequence available. Alignments of all loci are attached.

| A  | Marker | Alu    | File Name      | Chr | Human genome (hg19) |           |            |                 | Homo | Chimp | Orang | Baboon | Rhesus | Marmoset | Tarsius | Bushbaby | Mouse lemur | Outgroups  |       |            |     |       |
|----|--------|--------|----------------|-----|---------------------|-----------|------------|-----------------|------|-------|-------|--------|--------|----------|---------|----------|-------------|------------|-------|------------|-----|-------|
|    |        |        |                |     | From                | To        | Intron     | Gene            |      |       |       |        |        |          |         |          |             | Tree shrew | Mouse | Guinea pig | Dog | Horse |
| 1  | A40    | FLAM_A | link40-GC      | 1   | 85425503            | 85425834  | intron     | MCOLN2          | +    | +     | +     | +      | +      | +        | +       | -        | -           | ?          | ?     | ?          | -   | -     |
| 2  | A02    | AluSx  | chr2_15395-GC  | 2   | 227644729           | 227645219 | intron     | IRS1            | +    | +     | +     | +      | +      | +        | -       | -        | ?           | -          | -     | -          | -   | -     |
| 3  | A51    | AluSx  | link51-GC      | 3   | 186462009           | 186462748 | downstream | KNR1            | +    | +     | +     | +      | +      | +        | -       | -        | ?           | ?          | -     | -          | -   | -     |
| 4  | A64    | FLAM_A | link64-GC      | 5   | 149390430           | 149390749 | intron     | HMGXB3          | +    | +     | +     | +      | +      | +        | -       | -        | -           | -          | -     | -          | -   | -     |
| 5  | A78    | FAM    | link78-GC      | 7   | 116945630           | 116945990 | intron     | WNT2            | +    | +     | +     | +      | +      | +        | -       | -        | d           | ?          | -     | -          | -   | -     |
| 6  | A80    | FLAM_A | link80-GC      | 8   | 42056706            | 42057148  | intron     | PLAT1           | +    | +     | +     | +      | +      | + Ins    | +       | -        | -           | ?          | ?     | ?          | -   | d     |
| 7  | A82    | FLAM_A | link82-GC      | 8   | 100490117           | 100490437 | intron     | VPS13B          | +    | +     | +     | +      | +      | d        | +       | -        | -           | -          | ?     | ?          | -   | -     |
| 8  | A10    | FLAM_C | chr10_80089-GC | 10  | 116318982           | 116319321 | intron     | ABLIM1          | +    | +     | +     | +      | +      | +        | -       | -        | -           | -          | ?     | -          | -   | -     |
| 9  | A04    | FAM    | link4-GC       | 11  | 20659017            | 20659401  | intron     | SLC6A5          | +    | +     | +     | +      | +      | +        | -       | -        | -           | -          | -     | -          | -   | -     |
| 10 | A08    | FLAM_A | link8-GC       | 11  | 128763149           | 128763492 | intron     | KCNJ5           | +    | +     | +     | +      | +      | +        | -       | -        | -           | -          | -     | -          | ?   | ?     |
| 11 | A26    | FLAM_A | link26-GC      | 12  | 27844129            | 27844452  | intron     | PPFIBP1         | +    | +     | +     | +      | +      | +        | -       | -        | -           | -          | -     | -          | -   | -     |
| 12 | A14    | FLAM_A | link14-GC      | 12  | 52040757            | 52041082  | intron     | SCN8A           | +    | +     | +     | +      | +      | +        | -       | -        | -           | ?          | -     | ?          | -   | -     |
| 13 | A15    | FLAM_A | link15-GC      | 12  | 52138299            | 52138609  | intron     | SCN8A           | +    | +     | +     | +      | +      | +        | -       | -        | -           | -          | ?     | ?          | -   | -     |
| 14 | A17    | FLAM_A | link17-GC      | 12  | 99835883            | 99836207  | intron     | ANKS1B          | +    | +     | +     | +      | +      | +        | -       | -        | -           | ?          | -     | -          | -   | -     |
| 15 | A19    | FRAM   | link19_NNN-GC  | 13  | 44909151            | 44909472  |            | intergenic      | +    | +     | +     | +      | +      | +        | -       | -        | -           | -          | -     | -          | -   | -     |
| 16 | A20    | FLAM_A | link20-GC      | 13  | 48569115            | 48569407  | intron     | SUCLA2          | +    | +     | +     | +      | + Ins  | +        | +       | -        | -           | -          | ?     | ?          | ?   | ?     |
| 17 | A21    | FLAM_A | link21-GC      | 14  | 37734831            | 37735102  | intron     | MIROL1          | +    | +     | +     | +      | +      | +        | -       | -        | -           | -          | -     | -          | -   | -     |
| 18 | A16    | AluJb  | chr16_26298-GC | 16  | 48009727            | 48010240  | intron?    | NSCAN:chr16.559 | +    | +     | +     | +      | ?      | +        | +       | -        | -           | ?          | ?     | ?          | -   | -     |
| 19 | A29    | AluSx  | link29-GC      | 17  | 40401035            | 40401512  | intron     | STAT5B          | +    | +     | +     | +      | ns     | +        | +       | -        | -           | -          | ?     | ?          | -   | ?     |

| №  | Marker | LINE  | File Name            | Human genome (hg19) |           |           |         |             |      |       |       |        |        |          |           | Outgroups |             |            |       |            |     |
|----|--------|-------|----------------------|---------------------|-----------|-----------|---------|-------------|------|-------|-------|--------|--------|----------|-----------|-----------|-------------|------------|-------|------------|-----|
|    |        |       |                      | Chr                 | From      | To        | Intron  | Gene        | Homo | Chimp | Orang | Baboon | Rhesus | Marmoset | Tarsulius | Bushbaby  | Mouse lemur | Tree shrew | Mouse | Guinea pig | Dog |
| 1  | L06    | L1PB4 | 06_L1PB4-JS-GC       | 1-rc                | 182523983 | 182524650 | intron  | RGSL1       | +    | +     | +     | +      | +      | +        | +         | -         | -           | -          | ?     | -          | -   |
| 2  | L36    | L1PB4 | 36_L1PB4-JS-GC       | 4                   | 148410120 | 148410633 | intron  | EDNRA       | +    | +     | +     | +      | +      | +        | +         | -         | -           | -          | ?     | ?          | d   |
| 3  | L39    | L1PB4 | 39_L1PB4-JS-GC       | 5                   | 85738933  | 85739326  |         | intergenic  | +    | +     | +     | +      | +      | +        | -         | -         | -           | -          | ?     | -          | -   |
| 4  | L41    | L1PB4 | 41_L1PB4-JS-GC       | 5                   | 117422698 | 117423070 |         | intergenic  | +    | +     | +     | +      | +      | +        | -         | -         | -           | -          | ?     | -          | -   |
| 5  | L43    | L1PB4 | 43_L1PB4-JS-GC       | 5                   | 144208914 | 144209472 |         | intergenic  | +    | +     | +     | +      | +      | +        | -         | -         | -           | -          | ?     | -          | d   |
| 6  | L70    | L1PB4 | 70_L1PB4_Low_C-JS-GC | 8                   | 110725747 | 110726430 |         | intergenic  | +    | +     | +     | +      | +      | +        | -         | -         | -           | -          | ?     | -          | -   |
| 7  | L77    | L1PB4 | 77_L1PB4_Short-JS-GC | 9                   | 118511092 | 118511429 |         | intergenic  | +    | +     | +     | +      | ns     | +        | +         | -         | -           | -          | -     | -          | -   |
| 8  | L79    | L1PB4 | 79_L1PB4_Long-JS-GC  | 10                  | 53068949  | 53070094  | intron  | PRKG1       | +    | +     | +     | +      | ?      | +        | +         | -         | -           | -          | -     | ?          | -   |
| 9  | L84    | L1PB4 | 84_L1PB4_Short-JS-GC | 11                  | 48268829  | 48269271  | intron? | OLFR pseudo | +    | +     | +     | +      | ?      | +        | +         | -         | -           | -          | -     | ?          | -   |
| 10 | L85    | L1PB4 | 85_L1PB4-JS-GC       | 11                  | 82496018  | 82496816  |         | intergenic  | +    | +     | +     | +      | +      | +        | -         | -         | -           | -          | ?     | ?          | -   |
| 11 | L87    | L1PB4 | 87_L1PB4_DRs-JS-GC   | 11-rc               | 101357895 | 101358459 | intron  | TRPC6       | +    | +     | +     | +      | +      | +        | -         | -         | -           | -          | -     | ?          | -   |
| 12 | L90    | L1PB4 | 90_L1PB4-JS-GC       | 12                  | 15691874  | 15692397  | intron  | PTPRO       | +    | +     | +     | +      | +      | +        | -         | -         | -           | -          | ?     | ?          | -   |
| 13 | L96    | L1PB4 | 96_L1PB4_DRs-JS-GC   | 13                  | 94791280  | 94791771  | intron  | GPC6        | +    | +     | +     | +      | +      | +        | -         | -         | -           | -          | ?     | ?          | -   |
| 14 | L99    | L1PB4 | 99_L1PB4_GC          | 13                  | 106955531 | 106956238 |         | intergenic  | +    | +     | +     | +      | +      | +        | -         | -         | -           | -          | ?     | ?          | -   |
| 15 | L101   | L1PB4 | 101_L1PB4-JS-GC      | 14-rc               | 70591827  | 70592562  | intron  | SLC8A3      | +    | +     | +     | +      | +      | +        | -         | -         | -           | -          | -     | -          | ?   |
| 16 | L106   | L1PB4 | 106_L1PB4-JS-GC      | 15                  | 91729725  | 91730285  | intron  | SV2B        | +    | +     | +     | +      | +      | ?        | +         | -         | -           | -          | ?     | -          | -   |
| 17 | L109   | L1PB4 | 109_L1PB4-JS-GC      | 16                  | 53813451  | 53813717  | intron  | FTO         | +    | +     | +     | +      | +      | +        | -         | -         | -           | -          | -     | -          | -   |
| 18 | L111   | L1PB4 | 111_L1PB4-JS-GC      | 16                  | 79033507  | 79033899  | intron  | WVVOX       | +    | +     | +     | +      | +      | +        | -         | -         | -           | -          | -     | ?          | -   |
| 19 | L112   | L1PB4 | 112_L1PB4-JS-GC      | 17                  | 52302908  | 52303320  |         | intergenic  | +    | +     | +     | +      | +      | +        | -         | -         | -           | -          | -     | -          | -   |
| 20 | L113   | L1PB4 | 113_L1PB4-JS-GC      | 17                  | 67108495  | 67109272  | intron  | ABCA6       | +    | +     | +     | +      | +      | +        | -         | -         | -           | -          | ?     | -          | -   |
| 21 | L114   | L1PB4 | 114_L1PB4-JS-GC      | 17                  | 69850664  | 69851041  |         | intergenic  | +    | +     | +     | +      | +      | +        | -         | -         | -           | -          | d     | ?          | -   |
| 22 | L122   | L1PB4 | 122_L1PB4_GC         | 18-rc               | 70570246  | 70570892  |         | intergenic  | +    | +     | +     | +      | +      | +        | -         | -         | -           | -          | -     | ?          | -   |

| C  | Marker | LTR   | File Name            | Human genome (hg19) |           |           |         | Outgroups        |      |       |       |        |        |          |           |          |             |            |       |            |     |       |   |   |
|----|--------|-------|----------------------|---------------------|-----------|-----------|---------|------------------|------|-------|-------|--------|--------|----------|-----------|----------|-------------|------------|-------|------------|-----|-------|---|---|
|    |        |       |                      | Chr                 | From      | To        | Intron  | Gene             | Homo | Chimp | Orang | Baboon | Rhesus | Marmoset | Tarsulius | Bushbaby | Mouse Lemur | Tree shrew | Mouse | Guinea pig | Dog | Horse |   |   |
| 1  | M02    | MSTB1 | 02_MSTB1-JS-GC       | 1                   | 72001799  | 72002429  | intron  | NEGR1            | +    | +     | +     | +      | +      | +        | +         | +        | -           | -          | ?     | ?          | ?   | -     | - |   |
| 2  | M11    | MSTB1 | 11_MSTB1-JS-GC       | 2                   | 12467887  | 12468925  |         | intergenic       | +    | +     | +     | +      | +      | +        | +         | +        | -           | -          | ?     | ?          | ?   | ?     | ? |   |
| 3  | M12    | MSTB1 | 12_MSTB1-JS-GC       | 2                   | 23888260  | 23888910  | intron  | KLHL29           | +    | +     | +     | +      | +      | +        | +         | +        | -           | -          | -     | ?          | ?   | ?     | ? |   |
| 4  | M14    | MSTB1 | 14_MSTB1-JS-GC       | 2                   | 41988161  | 41989329  |         | intergenic       | +    | +     | +     | +      | +      | +        | +         | +        | -           | -          | ?     | -          | -   | -     | - |   |
| 5  | M15    | MSTB1 | 15_MSTB1-JS-GC       | 2                   | 70986163  | 70987267  | intron  | ADD2             | +    | +     | +     | +      | +      | +        | +         | +        | -           | -          | ?     | ?          | ?   | -     | - |   |
| 6  | M16    | MSTB1 | 16_MSTB1-JS-GC       | 2                   | 76496842  | 76497880  |         | intergenic       | +    | +     | +     | +      | +      | +        | +         | +        | -           | -          | ?     | ?          | ?   | -     | ? |   |
| 7  | M17    | MSTB1 | 17_MSTB1-JS-GC       | 2                   | 79406790  | 79407641  |         | intergenic       | +    | +     | +     | +      | +      | ns       | +         | -        | -           | -          | -     | ?          | ?   | ?     | - | ? |
| 8  | M18    | MSTB1 | 18_MSTB1-JS-GC       | 2                   | 79524907  | 79526021  |         | intergenic       | +    | +     | +     | +      | +      | +        | +         | +        | -           | -          | ?     | ?          | ?   | -     | ? |   |
| 9  | M20    | MSTB1 | 20_MSTB1-JS-GC       | 2                   | 143049616 | 143050310 |         | intergenic       | +    | +     | +     | +      | +      | +        | +         | +        | -           | -          | ?     | ?          | ?   | -     | - |   |
| 10 | M21    | MSTB1 | 21_MSTB1-JS-GC       | 2                   | 163323392 | 163324502 | intron  | KCNH7            | +    | +     | +     | +      | +      | +        | +         | +        | -           | -          | ?     | ?          | ?   | -     | - |   |
| 11 | M23    | MSTB1 | 23_MSTB1-JS-GC       | 2                   | 204609047 | 204609821 |         | intergenic       | +    | +     | +     | +      | +      | +        | +         | +        | -           | -          | d     | -          | ?   | -     | - |   |
| 12 | M24    | MSTB1 | 24_MSTB1-JS-GC       | 2                   | 204881327 | 204882441 | intron? | NSCAN:chr2.5.057 | +    | +     | +     | d      | d      | +        | +         | +        | -           | -          | ?     | ?          | ?   | -     | - |   |
| 13 | M25    | MSTB1 | 25_MSTB1-JS-GC       | 3                   | 5516648   | 5517583   |         | intergenic       | +    | +     | +     | +      | +      | +        | +         | +        | -           | -          | ?     | -          | -   | -     | - |   |
| 14 | M27    | MSTB1 | 27_MSTB1-JS-GC       | 3                   | 97667409  | 97668461  | intron  | MINA             | +    | +     | +     | +      | +      | +        | +         | +        | -           | -          | -     | -          | ?   | ?     | ? |   |
| 15 | M28    | MSTB1 | 28_MSTB1-JS-GC       | 3                   | 100298096 | 100298916 |         | intergenic       | +    | +     | +     | +      | +      | +        | +         | +        | -           | -          | ?     | -          | ?   | ?     | ? |   |
| 16 | M29    | MSTB1 | 29_MSTB1-JS-GC       | 3                   | 135023873 | 135024791 |         | intergenic       | +    | +     | +     | +      | +      | +        | +         | +        | -           | -          | ?     | -          | -   | -     | - |   |
| 17 | M30    | MSTB1 | 30_MSTB1-JS-GC       | 3                   | 139417287 | 139418030 |         | intergenic       | +    | +     | +     | +      | +      | +        | +         | +        | -           | -          | -     | -          | -   | ?     | - |   |
| 18 | M34    | MSTB1 | 34_MSTB1-JS-GC       | 4                   | 137719968 | 137720579 |         | intergenic       | +    | +     | +     | +      | +      | +        | +         | +        | -           | -          | ?     | -          | -   | -     | - |   |
| 19 | M35    | MSTB1 | 35_MSTB1-JS-GC       | 4                   | 143741132 | 143741909 | intron  | INPP4B           | +    | +     | +     | +      | +      | +        | +         | +        | -           | -          | ?     | -          | ?   | -     | - |   |
| 20 | M37    | MSTB1 | 37_MSTB1-JS-GC       | 5                   | 57569487  | 57570347  |         | intergenic       | +    | +     | +     | +      | +      | +        | +         | +        | -           | -          | -     | -          | -   | -     | - |   |
| 21 | M38    | MSTB1 | 38_MSTB1-JS-GC       | 5                   | 71725831  | 71726590  |         | intergenic       | +    | +     | +     | +      | +      | +        | +         | +        | -           | -          | -     | ?          | -   | -     | - |   |
| 22 | M40    | MSTB1 | 40_MSTB1-JS-GC       | 5                   | 103023126 | 103023778 |         | intergenic       | +    | +     | +     | +      | +      | +        | +         | +        | -           | -          | ?     | ?          | ?   | -     | - |   |
| 23 | M42    | MSTB1 | 42_MSTB1-JS-GC       | 5                   | 142864785 | 142865447 |         | intergenic       | +    | +     | +     | +      | +      | +        | +         | +        | -           | -          | ?     | -          | ?   | -     | - |   |
| 24 | M45    | MSTB1 | 45_MSTB1-JS-GC       | 5                   | 156950158 | 156950967 | intron  | ADAM19           | +    | +     | +     | +      | +      | +        | +         | +        | -           | -          | -     | -          | -   | ?     | ? |   |
| 25 | M47    | MSTB1 | 47_MSTB1-JS-GC       | 6                   | 11469344  | 11469903  | intron  | BCO30116         | +    | +     | +     | +      | +      | +        | +         | +        | -           | -          | ?     | ?          | ?   | ?     | ? |   |
| 26 | M48    | MSTB1 | 48_MSTB1-JS-GC       | 6                   | 11833730  | 11834681  |         | intergenic       | +    | +     | +     | +      | +      | +        | +         | +        | -           | -          | ?     | -          | ?   | -     | - |   |
| 27 | M51    | MSTB1 | 51_MSTB1-JS-GC       | 6                   | 62913631  | 62914174  | intron  | KHDRBS2          | +    | +     | +     | +      | +      | +        | +         | +        | -           | -          | -     | ?          | ?   | ?     | ? |   |
| 28 | M52    | MSTB1 | 52_MSTB1-JS-GC       | 6                   | 96573823  | 96574496  | intron  | FUT9             | +    | +     | +     | +      | +      | +        | +         | +        | -           | -          | -     | -          | ?   | -     | - |   |
| 29 | M53    | MSTB1 | 53_MSTB1-JS-GC       | 6                   | 93143652  | 93144311  |         | intergenic       | +    | +     | +     | +      | +      | +        | +         | +        | -           | -          | ?     | -          | ?   | -     | - |   |
| 30 | M56    | MSTB1 | 56_MSTB1-JS-GC       | 6                   | 140228311 | 140229201 |         | intergenic       | +    | +     | +     | +      | +      | +        | +         | +        | -           | -          | -     | -          | -   | -     | - |   |
| 31 | M58    | MSTB1 | 58_MSTB1-JS-GC       | 7                   | 17313454  | 17314625  |         | intergenic       | +    | +     | +     | +      | +      | +        | +         | +        | -           | -          | -     | -          | ?   | -     | - |   |
| 32 | M62    | MSTB1 | 62_MSTB1-JS-GC       | 7                   | 54574702  | 54575494  |         | intergenic       | +    | ?     | +     | +      | +      | +        | +         | +        | -           | -          | ?     | ?          | ?   | -     | - |   |
| 33 | M63    | MSTB1 | 63_MSTB1-JS-GC       | 7                   | 112196075 | 112196908 |         | intergenic       | +    | +     | ?     | +      | +      | ?        | +         | +        | -           | -          | ?     | ?          | ?   | -     | - |   |
| 34 | M66    | MSTB1 | 66_MSTB1-JS-GC       | 8                   | 33900254  | 33901030  |         | intergenic       | +    | +     | +     | +      | +      | +        | +         | +        | -           | -          | ?     | ?          | -   | -     | ? |   |
| 35 | M68    | MSTB1 | 68_MSTB1-JS-GC       | 8                   | 59081201  | 59081987  |         | intergenic       | +    | +     | +     | +      | +      | +        | +         | +        | -           | -          | ?     | ?          | ?   | ?     | ? |   |
| 36 | M71    | MSTB1 | 71_MSTB1-JS-GC       | 9                   | 9888236   | 9888896   | intron  | PTPRD            | +    | +     | +     | +      | +      | +        | +         | +        | -           | -          | ?     | ?          | ?   | -     | - |   |
| 37 | M72    | MSTB1 | 72_MSTB1-JS-GC       | 9                   | 16165094  | 16166044  | intron? | NSCAN:chr9.088   | +    | +     | +     | ?      | +      | ?        | +         | +        | -           | -          | ?     | -          | -   | -     | - |   |
| 38 | M73    | MSTB1 | 73_MSTB1-JS-GC       | 9                   | 75390342  | 75391364  | intron  | TMC1             | +    | +     | +     | +      | +      | +        | ?         | +        | -           | -          | ?     | -          | -   | ?     | - |   |
| 39 | M74    | MSTB1 | 74_MSTB1-JS-GC       | 9                   | 78197092  | 78197776  | intron  | MIR548H3         | +    | +     | +     | +      | d      | +        | +         | +        | -           | -          | ?     | -          | -   | -     | - |   |
| 40 | M75    | MSTB2 | 75_MSTB2_Low_C-JS-GC | 9                   | 82381408  | 82382075  |         | intergenic       | +    | +     | +     | +      | +      | +        | +         | +        | -           | -          | ?     | -          | -   | ?     | - |   |
| 41 | M76    | MSTB1 | 76_MSTB1-JS-GC       | 9                   | 114021689 | 114022444 |         | intergenic       | +    | +     | +     | +      | +      | +        | +         | +        | -           | -          | -     | ?          | ?   | ?     | - |   |
| 42 | M78    | MSTB1 | 78_MSTB1-JS-GC       | 10                  | 28155304  | 28155975  | intron  | ARMC4            | +    | +     | +     | +      | ?      | +        | +         | +        | -           | -          | ?     | ?          | -   | -     | - |   |
| 43 | M80    | MSTB1 | 80_MSTB1-JS-GC       | 10                  | 68222809  | 68223411  | intron  | STNNA3           | +    | +     | +     | +      | +      | +        | +         | +        | -           | -          | ?     | -          | ?   | -     | - |   |
| 44 | M81    | MSTB1 | 81_MSTB1-JS-GC       | 10                  | 72729661  | 72730274  | intron? | NSCAN:chr10.460  | +    | +     | +     | +      | +      | +        | +         | +        | -           | -          | -     | ?          | -   | -     | - |   |
| 45 | M82    | MSTB1 | 82_MSTB1-JS-GC       | 11                  | 28840715  | 28841512  |         | intergenic       | +    | +     | +     | +      | +      | +        | +         | +        | -           | -          | -     | -          | ?   | -     | - |   |
| 46 | M93    | MSTB1 | 93_MSTB1-JS-GC       | 13                  | 34914513  | 34915139  |         | intergenic       | +    | +     | +     | +      | +      | +        | +         | +        | -           | -          | ?     | ?          | ?   | -     | - |   |
| 47 | M94    | MSTB1 | 94_MSTB1-JS-GC       | 13                  | 43115060  | 43115947  |         | intergenic       | +    | ns    | +     | +      | +      | +        | +         | +        | -           | -          | ?     | ?          | ?   | -     | - |   |
| 48 | M95    | MSTB1 | 95_MSTB1-JS-GC       | 13                  | 66961365  | 66961983  | intron  | PCDH9            | +    | +     | +     | +      | +      | +        | +         | +        | -           | -          | -     | -          | -   | -     | - |   |
| 49 | M100   | MSTB1 | 100_MSTB1-JS-GC      | 14                  | 66177307  | 66178076  | intron  | FUT8             | +    | +     | +     | +      | +      | +        | +         | +        | -           | -          | ?     | -          | ?   | -     | - |   |
| 50 | M102   | MSTB1 | 102_MSTB1-JS-GC      | 14                  | 77133078  | 77133709  | intron? | NSCAN:chr14.512  | +    | +     | +     | +      | +      | +        | +         | +        | -           | -          | ?     | -          | ?   | -     | - |   |
| 51 | M290   | MSTC  | 290_MSTC-GC          | 14                  | 81387413  | 81388014  | intron  | SEP128           | +    | +     | +     | +      | +      | +        | +         | +        | -           | -          | -     | -          | ?   | ?     | ? |   |
| 52 | M107   | MSTB1 | 107_MSTB1-JS-GC      | 15                  | 92069407  | 92070337  |         | intergenic       | +    | +     | +     | +      | +      | +        | +         | +        | -           | -          | ?     | ?          | ?   | ?     | ? |   |
| 53 | M116   | MSTB1 | 116_MSTB1-JS-GC      | 18                  | 7386247   | 7386856   |         | intergenic       | +    | +     | +     | +      | ns     | +        | +         | +        | -           | -          | ?     | -          | ?   | -     | ? |   |
| 54 | M120   | MSTB1 | 120_MSTB1-JS-GC      | 18                  | 47430213  | 47430927  | intron  | MYO5B            | +    | +     | +     | +      | +      | +        | +         | +        | -           | -          | -     | ?          | -   | ?     | ? |   |
| 55 | M121   | MSTB1 | 121_MSTB1-JS-GC      | 18                  | 59209781  | 59210372  | intron  | CDH20            | +    | +     | ns    | +      | +      | +        | +         | +        | -           | -          | ?     | -          | ?   | -     | - |   |
| 56 | M124   | MSTB1 | 124_MSTB1-JS-GC      | 20                  | 20820219  | 20820851  |         | intergenic       | +    | +     | +     | +      | +      | +        | +         | +        | -           | -          | -     | -          | ?   | -     | - |   |
| 57 | M130   | MSTB1 | 130_MSTB1-JS-GC      | X                   | 14910154  | 14910807  | intron  | MOSPD2           | +    | +     | +     | +      | +      | +        | +         | -        | -           | -          | -     | ?          | -   | -     | - |   |
| 58 | M131   | MSTB1 | 131_MSTB1-JS-GC      | X                   | 16448996  | 16449549  |         | intergenic       | +    | +     | +     | +      | +      | +        | +         | +        | -           | -          | -     | -          | ?   | -     | - |   |
| 59 | M132   | MSTB1 | 132_MSTB1-JS-GC      | X                   | 27688615  | 27689220  |         | intergenic       | +    | +     | +     | +      | +      | ?        | +         | +        | -           | -          | -     | ?          | ?   | ?     | - |   |
| 60 | M133   | MSTB1 | 133_MSTB1-JS-GC      | X                   | 38444759  | 38445363  | intron  | TSPAN7           | +    | +     | +     | +      | +      | +        | +         | +        | -           | -          | ?     | ?          | ?   | ?     | - |   |
| 61 | M135   | MSTB1 | 135_MSTB1-JS-GC      | X                   | 63056146  | 63056802  |         | intergenic       | +    | +     | +     | +      | +      | +        | +         | +        | -           | -          | ?     | ?          | ?   | -     | - |   |
| 62 | M137   | MSTB1 | 137_MSTB1-JS-GC      | X                   | 111682658 | 111683367 | intron  | ZCCHC16          | +    | +     | +     | +      | +      | +        | +         | +        | -           | -          | -     | -          | ?   | -     | - |   |
| 63 | M138   | MSTB2 | 138_MSTB1-JS-GC      | X                   | 112654566 | 112655210 |         | intergenic       | +    | +     | +     | +      | +      | +        | +         | +        | -           | -          | -     | ?          | ?   | ?     | - |   |

## Marker A40

>FLAM\_A

```
-----  
-----gccccggcgggtggcggcgcctgtagtcccagctactcgggaggctg  
aggcgggaggatcgcttgagcccaggagttcgagaccagcctgggcaacatagcgagacccccgtctctataaaaaaaaaa  
aaaaaaaaaaaaaaaa-----  
-----
```

>Human

```
CTGTTATTTGTTGTCATTCCATGGTTCAATATGATACATCTGAACAATAATATACAAGATA-CAATTCTGAACAATTC  
A--GATAAAA---CTAATGTTAATTTA---gctgggtgaggtggcctgtggctgtagtcccagctgcttgggaggccg  
agggtgggaggatcacttaagcccaggagttcaaggctagccttggcaatatagcaaaacc-tgtctct-----aaaa  
aataaagtaaaatag---CTAATATTAATTTG---CATATGCAAACAACATACAGGCATACGG-TTTTTTCATGGTTT  
ACATTTTTTAGCTTTTATATTTTGT----TGTTTTAAAAAATACTA
```

>Chimp

```
CTGTTATTTGTTGTCATTCCATGGTTCAATATGATACATCTGAACAATAATATACAAGATA-CAATTCTGAACAATTC  
A--GATAAAA---CTAATGTTAATTTA---gctgggtgaggtggcctgtggctgtagtcccagctgcttgggaggccg  
agggtgggaggatcacttaagcccaggagttcaaggctagccttggcaatatagcaagacc-tgtctct-----aaaa  
aataaagtaaaatag---CTAATATTAATTTG---CATATGCAAACAACATACAGGCATAAGG-TTTTTTCATGGTTT  
ACATTTTTTAGCTTTTATATTTTGT----TGTTTTAAAAAATACTA
```

>Orangutan

```
CTGTTATTTGTTGTCATTCCATGGTTCAATATGATACATCTGAACAATAATATACAAGATA-CAATTCTGAACAATTC  
A--GATAAAA---CTAATGTTAATTTA---gctgggtgaggtggcctgtggctgtagtcccagctgcttgggaggccg  
agggtgggaggatcacttaagcccaggagttcaaggctagccttggcaatatagcaagacc-tgtctct-----aaaa  
aataaagtaaaatag---CTAATATTAATTTG---CATATGCAAACAACATACAGGCATAAGG-TTTTTTCATGGTTT  
ACATTTTTTAGCTTTTATATTTTGT----TGTTTTAAAAAATACTA
```

>Baboon

```
CTGTTATTTGTTGTCATTCCATGGTTCAAAATGATACATCTAAACAATAATATACAAGACA-CAATTCTGAACAATTC  
A--GATAAAA---CTAATGTTAATTTA---gcagggtgaggtggctctgtggctgtagtcccagctgcttgggaggccg  
agggtgggaggatcgcttaagcccaggagttcaaggctagccttggcaatatagcaagacc-tgtctct-----aaaa  
aataaagcaaaatag---CTAATATTAATTTG---CATATGCAAACAACATATAGGCATAAGGTTTTTTTTCATGGTTT  
ACATTTTTTAGCTTTTATATTTTGT----CGTTTTAAAAAATACTA
```

>Rhesus

```
CTGTTATTTGTTGTCATTCCATGGTTCAATATGATACATCTAAACAATAATATACAAGACA-CAATTCTGAACAATTC  
A--GATAAAA---CTAATGTTAATTTA---gcagggtgaggtggctctgtggctgtagtcccagctgcttgggaggccg  
agggtgggaggatcacttaagcccaggagttcaaggctagccttggcaatatagcaagacc-tgtctct-----aaaa  
aataaagtaaaatag---CTAATATTAATTTG---CATATGCAAACAACATATAGGCATAAGGTTTTTTTTCATGGTTT  
ACATTTTTTAGCTTTTATATTTTGT----CGTTTTAAAAAATACTA
```

>Marmoset

```
CTGCTATTTGTTGTCATTCCATGGTTCAAGATGATACATCTGAACAATAACATACAAGATATCAATTCTGAACAATTC  
A--GATAAAA---CTAAGGTTAATTTA---gctgggtgtggcagcctgtggctgtagtcccagttacttgggaggcca  
agggtgggaggatcacctaagcccaggagttcaaggccagccttggcaatatagcaagacc-tgtctctataaaaaaaaaa  
aaaaaagtaaaatag---CTAATATTAATTTG---CATATGCAAACAACATACAGGCATAAAATTTTTTTTAGTGGTTT  
ATATTTTTTAACTTTTATATGTTGTCTGACTTTCTTAAAAAATACTA
```

>Tarsier

```
CTGGCCTTTGTTTTTCAATTCATGGCTCAATACGATACATCTGAACCATAATATACAACATCAATTATGATCGATTC  
G--GATAAAA---TGAATGCTAATTTA---gccagggtgtggcagaatgta--acagtcccagct-----g  
agggtgggaggatcactcgagccatgaattcaaggccagcctggacaaaatagtaagacc-catctct-----aaat  
ataaagg-----AATGTCAATTTG---CATATGCAA-----TGTCATCGTTG  
TCCTTTTTTAGCTTTTGCATTTTATCTGACTTCTTAAAAAATGCTA
```

>Bushbaby

```
CTGTCATTTGTTGTCACGCCAGGGTTCAATATGCTATCTCTGAACGATAATATACAAGATGTGGATTATGAGCAATTC  
A--GATAAAA-----  
-----  
-----C---TGTTAACTTA---CATACGCAA-----CTGGCATAAGGATTTTTTTAATGGTTT  
ATATTTTTTAGCTTTTACATTTTGTCTGATGTTTCTTAAAAGACTA
```

>Mouse\_lemur

CTGTCATTTGTTGTCAATCCAAGGTTCAACATGATACCTTGGAAACAATAATATACAAAATGTCAATTATAAGCAATTC  
T--GATAAAA-----

-----C---TGTTAATTTG---CATATGCAAA-----CTGGCATAAGGG-TTTTAAGTGGTTT  
ATATTTTTTAGCTTTTACATTTTGTCTGAATTTTT---AAAGACTA

>Dog

CTGCTATTTGCTGTCACTCCACGGTTGGATATGAGAGA-CTGCAGGGCACTGAACCAGACATCAACTAAACGAACTTT  
TCAGATGAAA-----

-----ACACA-TTAATCTG---CATATGCAAA-----TATATATACTA-CTTTCTAGTGATTT  
ATA-TTTTTAGCTT-----TCTTGTCTG-ACTTTTTGAAAAGGCTG

>Horse

CTGTTATTTGCTGTCAATCCATGGTT-AATGTGATACA-CTGCATGACGCTAAATAAGACAGCAACT-CTTCACTTT  
TCCAGTGAAA-----

-----C-AATGTTAACAAG---CATATGCAAA-----CTTACATACTA-----TAGTGATTT  
ATATTTTTTAGCTTTTAAATTTCAACTG-ACTTCTTTAAAAGGCAG

## Marker A02

>AluSx

```
-----  
-----ggccgggcgcggtggctcacgcctgtaatcccagcactttgg  
gaggccgagggcgggcggtcacctgaggtcaggagttcagaccagcctggccaacatggtgaaacccctctctact  
aaaaatacaaaaa-ttagccgggctggtggcgcgccctgtaatcccagctactcgggaggctgaggcaggagaatc  
gcttgaacccgggagggcggttgagcagcagatcgcgccactgcactccagcctgggagcagagcgagact  
ccgtctcaaaaa-----
```

>Human

```
CA-----AAGAGGAAGAAAAAGGAGGAG-CAATGGGA-CACATCAGGAGGGAAATCTATGAATCACAAACTTTCT  
AACTGACCTCTTTTT---AAAATAGAGGTAGC---agccgggtgcggtggctcatgcctgtaatcccagcactttgg  
gaggccgagggcgggcgaaa--cacgagatcaggagttcaagaccagcctggccaacatggtgaaacccatctctact  
aaaaatacaaaaaattagctgggcatggtggcaggtgcctgtaatcccagctacttgggaggctgaggcaggagaatc  
gcttgaacctgggaagcagaggttgagcagcagatcacaccattgtactccagcctgggcaacagcatgatatt  
ccatgct--aaataaacaatt-----aattaaattaaattaaattaaat---TAAAATAGAG  
GTAGC---TGTGATATAATGCTTATTTTTCAAATAATTTTTCTCATTGCTTTTTGATATCTGAAACGTCAG
```

>Chimp

```
CA-----AAGAGGAAGAAAAAGGAGGAG-CAATGGGA-CACATCAGGAGGGAAATCTATGAATCACAAACTTTCT  
AACTGACCTCTTTTT---AAAATAGAGGTAGC---agccgggtgcggtggctcatacctgtaatcccagcactttgg  
gaggccgagatgggcgaaa--catgagatcaggagttcaagaccagcctggccaacatggtgaaacccatctctact  
aaaaatacaaaaaattagctgggcatggtggcaggtgcctgtaatcccagctacttgggaggctgaggcaggagaatc  
acttgaacctgggaagcagaggttgagcagcagatcacaccattgtactccagcctgggcaacagcgcgagatt  
ccatgct--aaataaacaact-----aattaaattaaattaaattaaat---TAAAATAGAG  
GTAGC---TGTGATATAATGCTTATTTTTCAAATAATTTTTCTCATTGTTTTGATATCTGAAACGTCAG
```

>Orangutan

```
CA-----AAGAGGAAGAAAAAGGAGGAG-CAATGGGA-CACATCAGGAGGGAAATCTATGAATCGCAAACCTTTCT  
AACTGACCTCTTTTT---AAAATAGAGGTAGC---agccgggtgcggtggctcatgcctgtaatcccagcactttgg  
gaggccgaggtgggagaa--catgagatcaggagttcaagaccagcctggccaacatggtgaaaccacatctctact  
aaaagtacaaaaaattagctgggcatggtggcagcgcctgtaagaccagctacttgggaggctgaggcaggagaatc  
gcttgaacccgggaagcagaggttgagcagcagatcacaccactgtactccagcctgggcaacagcagcagatt  
ccgtgct--gaataaataaata-----aattaaattaaattaaattaaat---TAAAATAGAG  
GTAGC---TGTGATATAATGCTTATTTTTCAAATAATTTTTCTCATTGCATTTGATATCTGAAATGTCAG
```

>Baboon

```
CAATATTCCCAAGAGGAAGAAAAAGGAGGAG-CAATGGGA-CACACCAAGAGGGAAATCTATGAATCACAAACTTTCT  
AACTGGCCTCTGTTT---AAAATAGAGGTAGC---gactgggcgcggtggctcatgcctataatctcagcactttgc  
gaggctaaggcaggtgaat--catgaagt caggagtttgagaacagcctggccaacatggtgaaacccctgtctctact  
aaaaatacaaaaaattagctgggctggtggcagggcctataataccagctactcgggaggctgaggcaggagaatc  
acttgaacccggaaagcagaggttgagcagcagatcgcgccactgtactctagcccaggcaatagtgcgagatt  
ccatctc--aaataaataaatt-----aaataaaat---AAAATTAGAG  
GTAGC---TGCGATATAATGC-TATTTTTCAAATAATTTTTCTCATTGCTTTTTGATATCTGAAACCTCAG
```

>Rhesus

```
CAATATTCCC-AAGAGGAAGAAAAAGGAGGAGCAATGGGA-CACATCAAGAGGGAAATCTATGAATCATAAACTTTCT  
AACTGGCCTCTGTTT---AAAATAGAGGTAGC---ggctgggctggtggctcatgcctgtaatctcagcactttgg  
gaggctaaggcaggtgaat--catgaagt cagaggttgagaacagcctggccaacatggtgaaacccctgtctctact  
aaaaatacaaaaaattagctgggctggtggcagggcctataatcccagctactcgggaggctgaggcaggagaatc  
acttgaacccgggaagcggaggttgagcagcagatcgcgccactgtactctagcccaggcaatagtgcgagatt  
ccatctc--aaataaataaata-----aaataaaat---AAAATTAGAG  
GTAGC---TGTGATATAATGC-TATTTTTCAAATAATTTTTCTCATTGCTTTTTGATATCTGAAACCTCAG
```

>Marmoset

```
CAATATTCCCAAGAGGAAGAAAAAGGAGGAG-CAATGGGA-GACATGACAAGGGAGGTCTATAACATCACAAATTTTGT  
AACTGGCCTC--TTT---AAAACAGAAGTAGT---ggctgagcacagtggtcatgcctgtaatcccagcactttgg  
gaggttgaggcaggtgaat--catgaggtcaggagttagagaccag-ctggccaacatgatgaaacaccatctctatt  
aaaaatacaaaaaattagccgggctggtggtacacacctataatcccaggtacttgcgaggctgaggcaggagaatc  
gcttgaacccaggaagcggaggttggtgagcagagattgcaccactgtactccagcccagatgaaagtgaagact  
ctgtctc---agtaagtaaat-----AAAAGAGAG
```

GAAGC---TATGATATAATGTTTACTTTTTCAAATGATTTTCTCATTGCTTTTGATATCTGAAACCTCAG  
>Tarsier  
AAGTATACCCAAGAGGAAGAAAAGGGAAGGAGCCAAAGGGA-TACCTTAGGCTGGAAGCTCTATGAACTACAAACTTAAT  
AACTGGCCTCTTTTT---AAAAATAGGGGTAGC---gccgggctcgggtggctca-gcctgtaatcccgcgcctttgg  
gaggctgaggtgagtgattgcccagagcccgcgggttcgagacccgcctgggcagc-----gagacctcatctttaca  
ataaaatcaaaaaattagccaggcgtggtagcgcctgtaattccggctacttggaggctgaggcggaaggatc  
gccagagcccagcaggtcgaggctgcggtg-gccgggagcg-gccactgtactccagctctgggtgacagagtgagact  
ccaactcaaaaacaacaaca-----aaaataataataaaaaat---AAAAATAGAG  
GTAGC---TATGATAGAATACTTG-TTTTCAAATAATTTTCTTGTGCTTTTGATATCTGAAACCTCCG  
>Bushbaby  
CAATATACCCAGAGGAACAAAAAGGAGGAG-GAAAGGGA-CATAG-AAGAGGAGGATCTATGAATCACCAACTTCAT  
AACTGGCCTCTTTTT-----  
-----  
-----AAAAATAGAG  
GTCAC---TATGACGTAGTACTTATTTTTCAAATAATTTTCTCATAGCTTTTGATATCTGAAACCTCAG  
>Mouse\_lemur  
CAATATACCCAAGAGGAAGAAAAAGAAGGAG-CAAAGGGA-CATAT-AGGAGGAAGCTCTATGAATCACCAACTTAAT  
AACCGCCTCCTTTT-----  
-----  
-----AAAAATAGAG  
GTAGC---TATGACATAATACTTATTTTTCAAATCATTCTCATTGCTTTTGATATCTGAGACCTCAG  
>Mouse  
TAATATACCCAAAAGGAATGAAGCAAAATGA-CATATTAGAAGTAT-----ATTTATGAACTGCAAACTGAGT  
AACTG-----  
-----  
-----AAAAACAGAG  
GTAAC-----TGATACAAGTACTTCTAAAGT-----  
>Guinea\_pig  
-----GGGAAATGAATGTG-----CAAAGGAA-TGTATTAG-AAGGAGATTTTATGAGTCACAACTTAG  
TAACTAGCCTCTTTTT-----  
-----  
-----CAAACAGAGAG  
GTAAC---TAAGATTCGGTACTTATTTTTCTAGGCAATTCTCTCATTGCTTTTGATATCTTAAACCTCAG  
>Horse  
CAATATACCCAAGAGGAAGAAAAG-AATGG-CATATGGA-TAAATCAGAAGAAGACTCTACGAATCACATACTTAAT  
AACTGGCCTCTTTTT-----  
-----  
-----AAAAAATAGAG  
GTAAC---TACGATACAATAATTATTTTTCAAATAATTTTCTCATTGCTTTTGATATCTT-----  
>Dog  
TCATATACTCAAGAGGAAGAAAAGGCACAAG-CATAGGGAACAACTAGAAAGGGACTCTCAAATCACACACTGAGT  
AACTGGTCTCTTTTT-----  
-----  
-----GAAAACAGAG  
GTAAC---TATGATACTATAATTATTTTTCAAATCATTCTCATCGCTTTTGGTATCTTAAACCTCAG



## Marker A51

>AluSx

```
-----  
-----ggccggggcgcggtggctcacgcctgtaatcccagcactttggggaggc  
cgagggcgggcgga-tcacctgaggtcaggagttcgagaccagcct-ggccaacatggtgaaaccccgtctctactaaa  
aatacaaaaattagccgggctggtggcgcgccctgtaatcccagctactcgggaggctgagggaggagaatcgctt  
gaaccggggaggcgagggttgacgtgagccgagatcgcgccactgcactccagcctggggcgacagagcg----agact  
ccgtctca-----  
-----
```

>Human

```
TGAAATTATCTTTCTGATCCAGGTAAAGAAGCAAATTGAAAATCAATAAAGTAAAAAGTGACGGAGATTTTAAATTTT  
CTGTAAT---AAAACA----CTTATTG---ggttgggcatggtggctcacgcctgtaatcccagcactttggggaggc  
cgaggtgggtgga-tgacctggcggtcaggagttcgagaccagcct-ggcca-catggcgaaactccatgtctaataaa  
aat-acaaaattagccgggctggtggcgacgcactgtaatcccagctactccagaggctgagggaggagaatcactt  
gagcctgagaggtggaggttgacgtgagctgagattgcaccactgcattccaggctgggtgacaaaatg-----aat  
tcagtctcaaaagaaa-----AAAACATTTATCG---AACACCTATTACAGCCATTTGCTATGCTA  
GATAATTTACTTTTTGGCATATAACTTAATCCTCACAACCCTCTAAGGCCCCCATGAACATCA
```

>Chimp

```
TGAAATTATCTTTCTGATCCAGGTAAAGAAGCAAATTGAAAATCAATAAAGTAAAAAGTGACGGAGATTTTAAATTTT  
CTGTAAT---AAAACA----CTTATTG---ggttgggcatggtggctcacgcctgtaatcccagcactttggggaggc  
cgaggtgggtgga-tgacctgggggtcaggagttcgagaccagcct-ggcca-catggcgaaactccacgtctaataaa  
aat-acaaaattagccgggctggtggcgacgcactgtaatcccagctactccagaggctgagggaggagaatcactt  
gagcctgagaggtggaggttgacgtgagctgagattgcaccactgcattccaggctgggtgacaaaatg-----aat  
tcagtctcaaaagaaa-----AAAACATTTATCG---AACACCTATTACAGCCATTTGCTATGCTA  
GATAATTTACTTTTTGGCATATAACTTAATCCTCACAACCCTCTAAGGCCCCCATGAACATCA
```

>Orangutan

```
TGAAATTATCTTTCTGATCCAGTAAAGAAGCAAATTGAAAACCAATAAAAATAAAAAAGTGATGGAGATTTTAAATTTT  
CTGTAAT---AAAACA----TTTATTG---ggctgggcatggtggctcacgcctgtaatcccagcactttggggaggc  
cgaggtaggtgga-ttacctgggggtcaggagttcaagaccagcct-ggcca-catggcgaaactccatgtctaataaa  
aat-acaaaattagccgggctggtggcgacacacactgtaatcccagctactccagaggctgagggaggagaatcactt  
gagcctgagaggtggaggttgacgtgagctgagattgcaccactgcaatccagcctgggtgacaaaatg-----aac  
tccgtctcaaaaaaaaaa-----AAAACATTTATTG---AATACCTATTACAGCCATTTGCTGTGCTA  
GATAATTTACTTTTTGGCATATAACTTCATTCTCACAACCCTCTAAGGCCCCCATGAACATCA
```

>Baboon

```
TGAAAT--TCTTTCTGATCCAGGTAAAGAAGCAAATAGAAAATCAATAAAAATAAAAAAGTGACAGAGATTTTAAATTTT  
CTGTAAT---AAAACA----TTTATTG---ggctgggcatggtcactcacgtgtgtaatcccagcactttggaaggc  
caaagcggggggagtgacctgggggtcaggagtttgagaccagcct-ggcca-catggcaaaaccccacgtctaataaa  
aat-acaaaattagccaggcgtggtggcgacatgcctgtaatccaagctactccagagg-tgagggaggagaatcactt  
tagcctgagagggcagaggttgactt-gcagaggttgaactactgcactccagcctgggtgacaaaatgaaacaaaac  
tcaggctcaaaaaaaaaaggaaaaaa-----AAAACATTTATTG---AAAATCTATTACAGCCATTTGCTGTGCTA  
GATAATTTACTTTTTGGCATATAACTTAATCCTCACAACCCTCTAAGGCCCTCGTGGTCATCA
```

>Rhesus

```
TGAAATTATCTTTCTGATCCAGGTAAAGAAGCAAATAGAAAATCAATAAAAATAAAAAAGTGACAGACATTTTAAATTTT  
CTGTAAT---AAAACA----TTTATTG---ggctgggcatggtcgctcacgcgtgtaatcccagcactttggggaggc  
caaagtgggggga-tgaccgggggtcaggagtttgagaccagcct-ggcca-catggcaaaaccccacgtctaataaa  
aat-acaaaattagccaggcgtggtggcgacatgcctgtaatccaagctactccagaggctgaagcaggagaatcactt  
tagcctgagagggcagaggttgactt-gcagaagttgaactactgcactccagcctgggtgacaaaatgaaacaaaac  
tcaggctcaaaaaaaaaaggaaaaaa-----AACACATTTATTG---AACATCTAATACAGCCATTTGCTGTGCTA  
GATAATTTACTTTTTGGCATATAACTTAATCCTCACAACCCTCTAAGGCCCTCGTGGTCATCA
```

>Marmoset

```
TGAAATTATCTTTGTGATCTAGGTAAAGAAGAAAATAGAAAATCAATAAAAATAAAAAAGTGAC--AGATTTTAAATTTT  
CTGTAAT---AAAAATCCCAGCACTTCA--ggaggg-tgagggcaggtagatgacatgtgggtcaggacttcaaga--c  
caacaaatctggcaaacacctccccatggtaaactaagatagcatggcca-catggtgaaaccccgtgtctaataaa  
agt-acaaaattagccgggtggtggcttgctgctgtagtccagatgctccagaggctgagggaggagattcactc  
gagcctgggatacagaggttgacgtgagctgagatcatgccactgcactccagcctgggtgacagaata-----aac  
ttagtgtcaaaaaaaga-----AAAAAAAATATTT---AACATCTATTACCATCATTTGCTGTGGTA
```

GACAATTTATTTTTGGCATATAACTTAATCCTCACAACCATTCTAAGGTGCCCATGCTCATCA  
>Tarsier  
GGAAATTATC-TTATGATCTAGGTAAAGGAGAAAATATAAAACCAATCAAATAAAAAAGTGGTAGAGATTTTAAATTTT  
CTGTAAT---AAAATA----TGTGTTGA--ggctgggcgccagtggtgaagtctgtaatcccagcagtttgggtggc  
taaggtgagagga-ttgcttgagtcagggttcgagaccagccaggcaa-cttgggtgaaacttcgtttctacaata  
aatcaaaaaattagctgggcatggtggtgcgccactgtagttccaactacttggaggctgaggtggaaggatcacct  
gagcccagcaggtcaaggctgcggtg-gctgtgagcatgccactgcactccagcctgggagacagaatg----agac  
tccaactaaaaaa-----AAAAGCATT---G---AATGCCTAGTAGAGCCATTTACCATGCTA  
TACCATTTACTCCAGGTGTCTAACTTAATCCTCACAACCCTGTTGGGCCCTGTGGTCATCT  
>Bushbaby  
TGAAATTATCTTTCTAGTCCAGGTAAAAGAGAAAATGGAAAGCCAATAAAATAAAAAAGTGATAG-----TGTTTT  
CTGTAAT-----  
-----  
-----  
-----  
-----AAAACATTTATCG--AGCGTCTAGCATAGCTATTTACTGGGCTA  
GAAAATTTACTTTTCGGCTCATAACATAGTCTCACAACCCTCTAAGGCTCCCATGATCACCT  
>Mouse\_lemur  
TGAAATTCTCTTTCTGGTCCAGGTAAAAGAGAAAATAGAAAGCTGATAAAATAAAAGGCAATAGATATTTTAAATTTT  
CTATAAT-----  
-----  
-----  
-----ATAAACATTTATCA--AGTGCTTATTATAGCCATTTACTGTGGGA  
GACAATTTACTTTTGGTGTATAACTTAATCCTCACAACCACTCTCAGGTTCCCATGAT---CT  
>Guinea\_pig  
--GAAATATCATTCTGATTTGGGGAAAAGAGAAAATAG-----AAATAAAACATGGA--GAATTTTAATTGTT  
CTTTAAC-----  
-----  
-----  
-----AAAAG-TATTTATTG--ACATT-----GACTGCGTCA  
GACCATTTGCTTTTGGAGTGCAGCTTAATCCTTATAGCCGTTCTGAAGAGGCCCT-ATAACCA  
>Dog  
TTAAATTATCTTTCTGAACTGGGTAAAGAAGAAAATAGAAATCCAGTAGAAGAAAAAGT-ATAAAGATTTTAAATTTT  
CTGTAGT-----  
-----  
-----  
-----AAAACACATGTATTG--AATGCCTATGATAGCCATTTACTATGCTA  
GACAATTTCTTTTGGGGTGTAACCTTAATCCTCACAACCACTCAGAGGTCCCCATCATCA-CT  
>Horse  
TAAAATTATCTTTCTGATCAGGTAAAGGAGAAAAGTAGAAAGCCGGTAGAATAAAGAGTGATCGAGATTTTAAATTTT  
CTGTAAT-----  
-----  
-----  
-----GAAACACATTTATTG--AATGTCTATTATAGCCATTTACTATGCTA  
GACAATTTCTTTTGGTGTGTAACCTTAATCCTCACAACCACTCTGATGTCCCTGTGGTCA---

## Marker A64

>FLAM\_A

```
-----  
-----gccgggcgcggtggcgcgcgctgtagtcccagctactcgggagg  
ctgaggcgggaggatcgcttgagcccaggagttcgagaccagcctgggcaacatagcgagaccccgtc---tctaaaa  
aaaaaaaaaaaaaaaaaaaaa-----  
-----
```

>Human

```
CCCCATCTGAATCCAGGAAGACCTGGGTACAGGTCTTGTGTGAAAATTCT-TGTACA---CAGCTCAAGGTGC-CATT  
G---TTTGCT---GAAATAGTCTTCAGGGA---gccag-tgtgatgg-acaagcctataatcctggctacttgggagg  
ctgaggcaggaggactgcttaagcccaggaatgcaagaccagcctgggcaacagagtgaaatcccatt---tcaagaa  
aag---GA-AGCAGTCTTCAGAAA---ACATAAAATCCTGACTGATACTAAATTGCCTGACAGATCCTAGCTTTGACT  
CGTGGATA-ATTCAAATACAATTTGCAGCTTTCTT
```

>Chimp

```
CCCCATCTGAATCCAGGAAGACCTGGGTACAGGTCTTGTGTGAAAATTCT-TCTACA---CAGCTCAAGGTGC-CACT  
G---TTTGCT---GAAATAATCTTCAGGGA---gccag-tgtggtgg-acaagcctataatcctggctacttgggagg  
ctgaggcaggaggactgcttaagcccaggaatgcaagaccagcctgggcaacagagtgaaatcccattatttcaagaa  
aag---GA-AGCAGTCTTCAGAAA---ACATAAAATCCTGACTGATACTAAATTGCCTGACAGATCCTAGCTTTGACT  
CGTGGATA-ATTCAAATACAATTTGCAGCTTTCTT
```

>Orangutan

```
CCCCATCTGAATCCAGGAAGACCTGGGTACAGGTCTTGTGTGAAAATTCT-TGTACA---CAGCTCAAGGTGC-CATT  
G---TTTGCT---GAAAAAGTCTTCAGGGA---gccag-tgtggtgg-acaagcctataatcctggctacttgggagg  
ctgaggcaggaggactgcttaagcccaggaatgcaagaccagcctgggcaacagagtgaaatctcatt---tcaagaa  
aag---GA-AGCAGTCTTCAGAAA---ACATAAAATCCTGACTGATACTAAATTGCCTGACAGATCCTAGCTTTGACT  
CATGGATA-ATTCAAATACAATTTGCAGCTTTCTT
```

>Baboon

```
CCCCATCTGAACCCAGGAAGACTTTGGTACAGGTCTTGTGTGAAAATTCT-TGTACA---CTGTTCAAGGTGC-CATT  
G---TTTGCT---GAAATAGTCTTCAGGGA---gccag-tgtggtgccacaagcctataatcctggctacttgggagg  
ctgaggcaggaggactgcttaagcccaggaatgcaagaccagcctgggcaacagagtgacatcccatt---tcaagaa  
aag---GA-AGCAGTCTTCAGAAA---ACA--AAATCCTGATTGATACTAAATTGCCTAACAGATCCTAGCTTTGACT  
CATGGATA-ACTCAAATACAATTTGCAGCTTTCTT
```

>Rhesus

```
CCCCATCTGAACCCAGGAAGACTTTGGTACAGGTCTTGTGTGAAAATTCT-TGTACA---CTGTTCAAGGTGC-CATT  
G---TTTGCT---GAAATAGTCTTCAGGGA---gccag-tgtggtgccacaagcctataatcctggctacttgggagg  
ctgaggcaggaggactgcttaagcccaggaatgcaagaccagcctgggcaacagagtgacatcccatt---tcaagaa  
aag---GA-AGCAGTCTTCAGAAA---ACA--AAATCCTGATTGATACTAAATTGCCTAACAGATCCTAGCTTTGACT  
CATGGATA-ACTCAAATACAATTTGCAGCTTTCTT
```

>Marmoset

```
CCCCATTTGTACCTAGGAGGACCTGGGTACCGGTGTTGTGTGAAAATTCT-TGTACA---CAGTTCAGGGTGC-CATT  
G---TTTGCT---GAAATAGTCTTCAGGGA---gccag-tgtggcggcacaagcctataatcctggctacttgggagg  
ctgaggcaggaacactgcttaagcccagaatgcaagaccagcctgggcaacagagtgagattccatt---tcaaaaa  
aag---GAAAACGGTCTTCAGAAA---ACATAAAATCCTGACTGATACTAA-TAGCCTGACAGATCCTAGCTTTGTCT  
CATGGATA-ATTCAAATACCATTTGCAGCTTTCTT
```

>Tarsier

```
TACCATTGTGTA-CCAGGAAGACTT-----TTTGAAAATTCT-CTTTTA---CAATGCAAAGTGC-CATT  
A---TCTGCT---AAAATGTTAT-----ag-tatggtggctcacacctataatcccagctacatgagagg  
ctgaggcagga---tacttgagcccaggaatgagaccagcctgggcaacag--tgagacccatt---tcaaaaa  
aaa---AAAAGCAGTCTTCAGGGA---ACATAAAATCCTGACTGATACTAA-CAGCCTGACAGATCCT-GCTTTGACT  
CATAAGTA-GCCCAAACACCATTTCCAGCTCTCTT
```

>Bushbaby

```
CCCCATCTGTGCTTATAAAGACCC-----TTTGAAAATTTTCCTAACA---CAGTTCAGGTAC-CACT  
G---TTTGCT-----  
-----  
-----GAAA-CAGTCTTCATGGA---ATGTAAAATCCTAACTGACACTAATAAGCCTGACAGATCCTGGCTTTGACT  
CATGGATA-ATCCAAACACCACCTTCCAGTTCTCTT
```

```

>Mouse_lemur
CCCCACCCGTGCTCAGAAAGACCT-----TTGAAAATT---CTAACA---CAGTTCAAGGTAT-CATT
G---TTTGCT-----
-----AAAA-CAGTCTTCAGGGA--ACATAAAATCCTAACCAATACTACTAG-----CTTGACT
CAGGGATA-AGGCAAATACCATTTTTAGCTCTCCT
>Tree_shrew
CCCTACCTGTGCCAGGAAGACCT-----TTTGAACATTCT-CATATC---CAGTTCACAGTACACTGT
G---CTTGCT-----
-----GAAA-TAGTGTTT CAGGGA--ACAAAAAATCCTGACTGATATCAA-CAGCCTGGCAGACCCTGAC--TGAAT
CATAGGCA-GCCCAAATACCAATTCTAGCTCACCT
>Mouse
TTCTCATCTCTAGCCAAGAGTTCC-----ACTCAGGAA-CT-CACA---CACAGTTCAAGGTAT-CACT
GTGGTTTTTT-----
-----GAAA-GAGATTTTAGG-----ACACGAAATCCTGGCAGGCACTAG-AAGCATGA-AGCTCTTGGCGTTGACT
CACGGATA-CCTTAAGTACCCTTTCCACTCTC--
>Guinea_pig
TGCCATCTAAGCCCAGGAAGACCT-----TTTA-----T-CATA---CACATTTCAAGATAT-CACT
G-TATTTGCT-----
-----GAAA-TAGTCATCAGGAA---CACAAAACCTAACTGGTACTAA-CAACCTGCGAGATCTGGGCTTTGACT
CCTAGACAGCCCTAAGCATCACGTGCAGCTCTC--
>Dog
CCCCTCTGCACCCAGGAAGACTA-----TTTGGAAATTCT-CCTACTAACAGTTCAAGGTGC-CATT
G-TGTCTGCT-----
-----GACA-CAATCTTCAGGGA--ACATAAAATCCTAAT-----AGCCTGAGAGATCCTGGCTTTGATT
CATGGATAGCCTG--TATTATTTAAATGCT-----
>Horse
TGTACTCTGTGCCAGAAAGACTA-----TTTGGAAATTCT-CCTA---GACAGTTCAACGTGC-CACT
G-TGCTTGCT-----
-----GAAA-CAATCTTCAGGGA--ACATAAAACCTGACTCATACTGA-TAGTCTGACAGATCTTGGCTTTGATT
CATGAATAA-CCCAAATATCTTTTCCATCCCTCCT

```



CTACTTCA  
>Bushbaby  
TCG----TCCCCTCCCCTCCATGAGCAAACCTGC-TCAAAGTCTGGCATTTAATCTCCCAGGCTCTCTGGAGT--TAA  
GAGTCCCCAGC-----  
-----ATAAAA-----CCCACTCACCAG--  
-----AAAGCAAATTCTCT-G-GTCCACAAGCTTACCCTATGTAGCCAGAGCCCCTACATACCATTATA  
CTAATTCA  
>Mouse\_lemur  
CC----CCTCCTACCCTCCACGGGCAAATTCC-TCAAAGTCTGGCATTTAACCTCCCAGGCTCTCCGGAGT--TAG  
G-GTCCCCAGC-----  
-----ATAAGAG-----CCAGCATCCTA--  
-CCCACTCAACAAAATGCAAATTCTAT-G-GTCCACAAGCCCTACCTATAACAACCAGAGCCCCTAAACATCTATTTA  
CTACTTCA  
>Guinea\_pig  
T----ACCTTCCCTCCAGCCAAAAGCAGAAGTCC-TAGGAATATGGCATGTTACCTCCCAGGTTTTCTGTCTT--TAC  
AAGTCCCCAGC-----  
-----ATGAT-----AGGCTGTATCCTG--  
-AACTCCAAGTAGAAAGCAAATTTCTCT-G-TTCCACAAGCTCTACTCATACAATCAAATTTCCAATGT--CTTTTA  
CCTACTTCA  
>Dog  
CCATCCACTCTCCTCCCCGCT-GAGTGGAAGTCC-TGGTA--CTGGCTTC--GCCTCCCAGGCTTTCTGGAGT--T--  
A-GTCTCCAGT-----  
-----ATAAC-----GCCAGTGTACTA--  
-CCTGTGCACGAGAAAGCAAATCTCTCT-G-ACCCACAAGCCCACTCATATAACCAGTGTTCTAAATACCATTTC  
TGAATTCA  
>Horse  
C-AGCCCCTCCCCTCCACCCT-GAGCAGAACTCC-TGAAG-TCTGGCATCTAACCTTCCAAGCTTTCTGGAGT--TGG  
A-GTCTCCAGT-----  
-----GTGAC-----AGCCAGTATCCTA--  
-CCTACTCACTATAAAGATAACCTCTCT-G-GTCCACAAGTGCCACCCAAACAACCAGAGTTCTAACTACCTTATTA  
TGAATTCA

**Marker A80**

>FLAM\_A

-----gcccgggc  
gcggtggcgcgcgctgtagtcccagctactcgggaggctgaggcgggaggatcgctt-gagcccaggagttcgagac  
cagcctgggcaacatagcgagacccccgtctctaaaaaaaaaaaaaaaaaaaaaaaaaaaaa-----  
-----  
-----  
-----  
-----

>Human

AGAGTCTGTTTCTTATCTAATTTACCAATTCCAA-TGAAGTGA--AGAGTATAGCATCCTCTCAGA--gctgggt  
gtggtggtttgcacctgtagtcctagctactcaggaggctgaggcaggagcatcactt-gagggcaggagttcaagac  
cagcctaggcaacatagcaagacccccatgtcttcaaa-----  
-----  
-----

-----AGAATAGAATA  
TTTTCT--GCGACACCCTGCCCCCACCATCAGAGCAGAATTTTCTCCAAAACATCTTCCAAATGTAGGCATATG  
G-CCTGTGTCTAAGCTATATGGAAT

>Chimp

AGAGTCTGTTTCTTATCTAATTTACCAATTCCAG-TGAAGTGA--AGAGTATAGCATCCTCTCAGA--gctgggt  
gtggtggtttgcacctgtagtcctagctactcaggaggctgaggcaggagcatcactt-gagggcaggagttcaagac  
cagcctaggcaacatagcaagacccccatgtcttcaaa-----  
-----  
-----

-----AGAATAGAATA  
TTTTCT--GCGACACCCTGCCCCCACCATCAGAGCAGAATTTTCTCCAAAACATCTTCCAAATGTAGGCATATG  
G-CCTGTGTCTAAGCTATATGGAAT

>Orangutan

AGAGTCTGTTTCTTATCTAATTTACCAATTCCAA-TGAAGTGA--AGAGTATAGCATCCTCTCAGG--gctgggt  
gtggtggtttgcacctgtagtcctagctactcaagacgctgaggcaggaggatcactt-gaggtgaggagttcaagac  
cagcctaggcaacatagcaagacccccatgtcttcaaa-----  
-----  
-----

-----AGAATAGAATC  
TTTTCT--GGCACACCCTGCCCCCACCATCAGAGCAGAATTTTCTCCAAAACATCTTCCAAATGTAGGCATATG  
G-CCTGCATCTAAGCTATATGGAAT

>Baboon

AGAGTCTGTTTCTTATCTAATTTACCAATTCCAA-TAAGGTGA--AGAGAATAGAATCATCTCAGA--gctgcgt  
gtggtggtttgcatctgtagtcctagctactcaggaggctgaggcaggaggatcactt-gaggtgaggagttcaagac  
cagcctaggcaacatagcaagacccccgtgtcttcaaa-----  
-----  
-----

-----AGAATAGAATC  
TTTTCT--GGCACACCCTGTCCCCCACCATCAGAGCAGAATTTTCTCCAAAGCATCTTCCAAATGTAGGCATATG  
G-CCTGTGTCTAAGCTATATGGAAT

>Rhesus

AGAGTCTGTTTCTTATCTAATTTGCGCAATTCCAA-TAAGGTGA--AGAGAATAGAATCATCTCAGA--gctgggt  
gtggtggtttgcatctgtagtcctagctactcaggaggctgaggcaggaggatcactt-gaggtgaggagttcaagac  
cagcctaggcaacatagcaagacccccgtgtcttcaaa-----  
-----  
-----





## Marker A82

>FLAM\_A

```
-----  
-----gccgggcgcggtggcgcgcgctgtagtcccagctactcgggaggctgaggcgggaggatcgcttgagccc  
aggagttcgagaccagcctgggcaacatagcgagaccccgctctctaaaaaaaaaaaaaaaaaaaaaaaaaaaa  
-----  
-----
```

>Human

```
AACTATGTGACCAAAGTTACCCTGTTTCCTTTAATGTCTTTAGACACCAGTATCTCAGACCCTAAATACTATGCTTAT  
TCCAAAGTTAAAT---GAGCCTGT---cctgtaatcccagcgacttggtaggctaagggtgggaggatcacttgagctc  
aggagtttgagaccact-tgagcaacataacaacatgctgtcctttatttaaaaaaaaaaaaaagaaaaaag-----  
-----AAGCCCAT---AGAATC-----TTTTTTTTTTT-TTAATGTGATGAAACTTC-TGTTTACCTTTGGCCA  
ACAAACTGATACATTGTTTTCTTATAG---GCATTCACAGGAACATAA
```

>Chimp

```
AACTATGTGACCAAAGTTACCCTGTTTCCTTTAATGTCTTTAGACACCAGTATCTCAGACCCTAAATACTATGTTTTAT  
TCCAAAGTTAAAT---GAGCCTGT---cctgtaatcccagcgacttggtaggctaagggtgggaggatcacttgagctc  
aggagtttgagaccact-tgagcaacataacaacatgctgtcctttatttaaaaaaaaaaaaaagaaaaaag-----  
-----AAGCCCAT---AGAATC-----TTTTTTTTTTT-TTAATGTGATGAAACTTC-TGTTTACCTTTGGCCA  
GCAAACCTGATACATTGTTTTCTTATAG---GCATTCACAGGAACATAA
```

>Orangutan

```
AACTATGTGACCAAAGTTACCCTGTTTCCTTTAATGTCTTTAGACACCAGTATCTCAGACCCTAAATACTATGTGTAT  
TCCAAAGTTAAAT---GAGCCTGT---cctgtaatcccagtgacttggtaggctaagggtgggaggatcacttgagctc  
aggagtttgagaccact-tgagcaacataacaacatgctgtcctttatttaagaaaaaaaaaaaaaaaa-----  
-----AAGCCCAT---AGAATC-----TTTTTTTTTTT-TTAATGTGATAAAACTTC-TGTTTACCTTTGGCCA  
GCAAACCTGATACATTGTTTTCTTATAG---GCATTCACAGGAACATAA
```

>Baboon

```
AACTATGTGACCAAAGTTACCGTGTTCCTTTAATGTCTTTAGTCACTGGTATCTCAGACTCTAAATACTATGTTTTAT  
TCCAAAGTTAAAT---GAGCCTAT---cctgtaatcccagcgacttagtaggctaagatgggaggatcacttgagctc  
aggagtttgagaccact-tgagcaacataacaaaaccttgcctttatttaaaaaaaaaaaaaagaaaaaagaaaaa  
aaaaaa---AAGCCCAT---AGGATC-----TTTTTTTTTTT-TTAATGTGATAAAACTTC-TGTTTACCTTTGGCCA  
GCAAACCTGATACATTGTTTTCTTATAG---GCATTCACAGGAATACAA
```

>Rhesus

```
AACTATGTGACCAAAGTTACCGTGTTCCTTTAATGTCTTTAGTCACTAGTATCTCAGACTCTAAATACTATGTTTTAT  
TCCAAAGTTAAAT---GAGCCTAT---cctgtaatcccagcgacttagtaggctaagatgggaggatcacttgagctc  
aggagtttgagaccact-tgagcaacataacaaaaccttgcctttatttaaaaaaaaaaaaaagaaaaaagaaaaa  
aaaata---AAGCCCAT---AGGATC-----TTTTTTTTTTT-TTAATGTGATAAAACTTC-TGTTTACCTTTGGCCA  
GCAAACCTGATACATTGTTTTCTTATAG---GCATTCACAGGAATACAA
```

>Tarsier

```
AACTATTTTCAGCAAAGTTATCCAATTCTACTTAAATGTGTTTAGACACCGATCTCTCAG--TCTAAAAATTGTTTTCAT  
TTCAAAACTAAAT---GAGCCTGT---cctataatcccagtgacttgagaggctgagatgggaggatggccttgagcct  
aagagtttagagaccagctcgggcaacatagcaagattctgtttcctttatttaaaaaaaaaagc-----  
-----GAGCCTGT---AGAATCCTTTCTTT-----AAC---ATAACACTTCAAATTTTCTTTAGTCA  
TTGAATTCATAAATTGTCTTCTTACAG---TTATTCTCAAGAGCATAA
```

>Bushbaby

```
AACTATTTTATTAAGTTTCCTAATTCTTCTTGATGTCTTCATATGCTAATCTCACAAACCCTAAAAATTGTGTTAAT  
TCAGAAATTAAT-----  
-----GACCCTAT---AGAATCCTTTATTT-----AACATAATAAAACTTT-AATTTTCCCTTGGTCA  
ATAATTTGATATATTGTCTTCTTATTT---GCATTCTCAAGAACATAA
```

>Mouse\_lemur

```
ATCTGTTTTACCAAATCACCCAGTTTGCCTTGATATCTTCATATACTAATCTCACAGTCCCT-AAAATTGTGTTTCT  
TGAAAAAGTATAT-----  
-----GAGCCTAT---AGAATCCTTTCTTT-----AACATAATAAAACTTT-AATTTTCCCTTGGTCA  
GTAATTTGATATATTGTCTTCTTTTATAG---GCATTTTCAAGAAATATAA
```

>Tree\_shrew

AATTATTTTACCGAAGTT-TTTAATTTTCTTTAATGTCTCCAACACTGTTTG-CCAGACCCTAGGAATTATGTTTCAT  
TTCAAA-TTAAGT-----

-----AATACTGT--AGAATCCTCTTTTT-----TTT-GATGTTTCTTT-----  
-----CATTATAGAGGAGAGAC

>Dog

TACTGTTTTACCAACGTTG-CCAGTTCTCTTCGTGTCTTTAGACACTAGTCTCTTTGGCCTTAAAAATTGTATTTAT  
TCTAAAATTGAAA-----

-----GAGCCTGG--AGAATCATGTTTTT-----AATAT-GTAAAATTTT-AATTTTCCCTTAGCCA  
ATAAATTGATAGATTTTGTCTTCTTTAAGGCATTTCTAGGAATGTAA

>Horse

AACTGTTTTACCAAAGTTACCCAATTCCCTTTTCATGCCTTTAGACACTAGTCTCTCAGAACTTAAAACTGTATTCCT  
TCCAAAATTAAT-----

-----GAGCCTGT---AAAATT-----CTCTCTTTAATATAATAAAAATTTT-AGTTTTCCCTCAGCCA  
ATAAGTTGATATATTTTGTCTCCGAAAAGGCATTCCCAGGAACATAA

## Marker A10

>FLAM\_C

```
-----  
-----rgccggggcgcggtgggtcacgcctgtaatcccagcactttgggaggccg  
aggcgggaggatcgcttgagcccaggagttcgagaccagcctgggcaacatagcgagacccccgtctctcaaaaaaaaaa  
aaaaaaaaaaaaaaaa-----  
-----
```

>Human

```
AATGGGAAGTTATCAAAACAAAGCCAAGCACCCTCAATCATGG--TATGCTCTCAGAAAAGG-CAATGGTCACATGG  
CAACCTT---GAAGATTCTGATTTCT---agtcgggtgtgggtggcacatgcctgtaatcccagctactcaggagcgtg  
agggtgggaggattacttgagcccaggagtttgagaccagcttggacaacatagcaaaaactcgtctctcaaaaaaaaa  
aaaaaaaaaaaaa-aagaaagaaagaaaaaagaaaaaagaa---AAAGATACTGACTTCC---AACCTTCATGAGTG  
AAAAGTTCTGGCCATGGCTGTAGTGGACAGGATGTGCTCACCT
```

>Chimp

```
AATGGGAAGTTATCAAAACAAAGCCAAGCACCACCAATCATGG--TATGCTCTCAGAAAAGG-CGATGGTCACATGG  
CAACCTT---GAAGATTCTGATTTCC---agtcgggtgtgggtggcacatgcctgtaatcccagctactcaggaggctg  
agggtgggaggattacttgagcccaggagtttgagaccagcttggaaaatagagcaaaaactcgtctctcaaaaaaaaa  
aaaaaaaa-----aaagaaagaaagaaagaaaaaagaa---AAAGATACTGACTTCC---AACCTTCATGGGTG  
AAAAGTTCTGGCCATGGCTGTAGTGGACAGGATGTGCTCACCT
```

>Orangutan

```
AATAGGAAGCTATCAAAACAAAGCCAAGCACCACCAATCATGG--GATGCTCTCAGAAAAGG-CAATGGTCACATGG  
CAACCTT---GAAGATTCTGATTTCC---agtcgggtgtgggtggcacatgcctataatcccagctactcaggaggctg  
agatggaaggattacttgagcccaggagtttgagaccagcttggacaatatagcaaaaacttg--tctcaaaaaaaaa  
-----aaaaaaagaaagaaagaaaaaagaa---AAAGACTGACTTCC---AACCTTCATGGGTG  
AAAAGTTCTGGCCATGGCTGTAGTGGACAGGGTGTGCTCACCT
```

>Baboon

```
AATGGGAAGCTATCAAAACAAAGCCAAGCATCACCAATCATGG--GATGCTCTCAGAAAAGG-CGATGGTCACATGG  
CAACCTT---GAAGATTCTGATTTCC---agtcggccatgggtggcacatgcctataatcccagctactcaggaggctg  
agggtggga-gattgcttgagcccaggagtttgagatcagcttggacaatgtagcaaaaactcatctcaaaaaaaaa  
aaaaaaaaaagaag---aagaagaagaagaaaaaagaa---AAATATACTGACTTCC---AACCTTCATGGGGG  
AAAAGTTCTAGCCATGGCTGTAGTGGACAGGGTGTGCTCACCT
```

>Rhesus

```
AATGGGAAGCTATCAAAACAAAGCCAAGCATCACCAATCATGG--GATGCTCTCAGAAAAGG-CGATGGTCACATGG  
GAACCTT---GAAGATTCTGATTTCC---agtcggccatgggtggcacatgcctataatcccagctactcaggaggctg  
agggtggca-gattgcttgagcccaggagtttgagaccagcttggacaacgtagcaaaaactcatctcaaaaaaaaa  
aaaaaaaaaaaaaagaagaagaagaagaagaagaaaaaagaa---AAATATACTGACTTCC---AACCTTCATGGGGG  
AAAAGTTCTAGCCATGGCTGTAGTGGACAGGGTGTGCTCACCT
```

>Marmoset

```
AATGGGAGACTATCACAGCAAAGCCAAGCACCACCCAGTCATGG--GATGCTCTCAGAAAAGG-CGATGGTCACATGG  
CAACCTT---GAAGATACTGATTTCC---agtcaggcgtgggtggcacatgcctatcatcccagctactctggaggctg  
agggtgggaggattgcttgaggccaggagtttgaaaccagcttggacaacacagcaagaactcgtctcaaaaacaaaac  
aaaaca-----AAACATACTGACTTCT---AACCCACATGGGTG  
AAAAGTTCTGGCCATGACTGTAGCAGACA--ATGTCCTCACCT
```

>Tarsier

```
GATGGAAAACATGAAAACAAAGCCAAGTACTACCAATCATGG--ATACTCTCAGAAAAG- TAATGGTCACATAG  
CAATCTC---AAAGATACTGATTTCC---agtcaggcatgggtggcatgccatagctcccagctacttgggaggcca  
agggtgggaggactgcttgagctcaagagtttgagaccagcttgggcaacgtggaaagaccctgtctcaaaaaaaaa  
aaaaa-----AAGGAAACGAATTTCA---AGCCTGCATGGGTT  
AAAAGTTCAGGGCATGGTGTCAATGGACAAGATGTGCTCTCCAT
```

>Bushbaby

```
GGTGGGAAGCTATGAAAACAAAGCCAAGCACCACCCAGTCACCACCCATGCTCGCAGAAAAGG-TGATGGTCCCACAG  
CAACCTC-----  
-----  
-----AAAGGCACTGATTTCC---AACCTGCATAGGTG  
AAAAGTTCTGACCACAGCTTCAGTGCACAGGGAATGTCATT-TT
```

```

>Mouse_lemur
GATGGAAAGCTATGAACACAAAGCCAAGCACCACCCAATCACAG--GATGCTCTCAGAAAAGG-TGACAGTCCCATAG
CAACCTC-----
-----
-----AAAGGCACTGATTTTC---AACCTTCATGTGTA
ATAAGTTCTGGCCATGGCTTCA-TGCTCA-----TC-AT
>Tree_shrew
GATAAGCAACTATGAAAACAAA-TCAAGTACCACTCAGTCATAG--GGTGCTCTCAGCGAAGGCTG-TGGTCGTGTGG
AAACCCC-----
-----
-----AAGAATACTGATTTTC---AGTTTGTATGGGTG
AGTAGTTCAGGCCATGGCTGCAGTGGACAGGGCACACAG-CCAC
>Guinea_pig
GGAGGAAAGCAGAAGAAACAAAGCCAAGCACCACAGAATCATGG--GAGGCCCTCAGGAAAGGCGC-CCATCATGTGA
TAACCTT-----
-----
-----AAGGATACTGATTTTC---AACC-ACATGGGTG
AAAAGTTTAGGTCGTAGCTTTGGTGAAGAAA-----GCAT
>Dog
GTTGGGGAGTCATGGGAACAAAGCCAAACACCACCCAATCAT-G--GATGCTCTTGGAAAAGGCTA-TGGTCACATGG
TAGCCTC-----
-----
-----AAGGATACTGACTTCC---AACCTGCAGAGGTG
--GAGTTCAGGCCACAGTCTCACTGGACTGGGCA-----CCCT
>Horse
GATGGGAAGCTGTG-----ACCCAATCATGG--GATGCTCTCAGAAAAGGCTA-CAGTCACATGG
CAGCCTC-----
-----
-----AAGGATACTGATTTTC---AATCTGTCTAGGTG
AAAAGTTCAGGCCATAGCTCCAGTGGACAGGGCGTTCTTGTCAT

```



```

-TCTA-CA-CCACTTGAGTTT-CTTCT-ACTCCTGAGT
>Bushbaby
TAGGCACGTCTGTTCATCTTGGCTCCCAGTGATGCTTCCAGCATCTTCATAATTGAGATGTAGCCTTCTTGAGCCAACA
AGGCAGGTGTGCCTACTTT-----
-----
-----AAG
AAAATAGAATACGTG----AAAGCCCACATTTTCTAACCAGATAAAATTTCCAGGTG-GTTACTCATTACATATGAG-
-T-TA-CAGCCACTCGAGTTC-CTTGG-AGTACTGAAT
>Mouse_lemur
TA-----TGTCATCTTGGCTACCAGTGATGCTTCTAGCATCTTCGTAATTGAGATGTAGCCTTCTTGAGCCAACA
AGGCAGGTGTGTCTACTTT-----
-----
-----AAG
AAAATAGGATACATG----AAAATCCAAATTTTCCAACCAGATAAAATTTCCAGGTG-ATTACTCATTATGTATGAG-
-TCTA-CAGCCACTTGGGTTC-CTTCT-AGTCATGAAT
>Tree_shrew
GA-----TGTCATGTTGGCGACTCATGATGCTTCTAGCATCTTCGTAATTGAGATGTAGCCTTCTCGTGCCAACA
AGGCAGGTGTGTCTACTTT-----
-----
-----GAG
AAAATGGGATGTATG----AGAACTCAGACTTGCCAACCAGAGACATTTCCAGGTG-ATTCCTTGGCCTAGCTGAG-
-TCTGT-CGTCACCTGAGTTC-CTCCT-GGCCCTGAGT
>Mouse
TA-----TGTCATCTTGGCTCCTAGCAAGGCCCTAGTATCTTCATAATTGAGATGTAGTCTTCTTGAGCCAATA
AGACAGGTGTGTCTACTTTA-----
-----
-----AAG
AAAACAGAGATCAGG----AACGTC-----CAGATTT--ATTC-ACCAGCCAAATTTCCAAGAA
-TATCACTTG-----AGGTTTTTCT-TAGTCCCGAGC
>Guinea_pig
TA-----TGTCATC-----CTGGGAATGCTTCTAGCGTCCTGGTAATTGAGTTGTAGCCTTCTTCAGCCAACA
AGACAGGTGTGTCTACTTTA-----
-----
-----AAG
AAATGGGAAACACAG----A-ACTCCAAATTTACCAGCTAGATGCATTCCCAAGCC-ATTACTCACTGTACATCAA-
-ACTA-CAGTCCCAAGTCCTTTCT-----GT
>Dog
CA-----TGTCGCCTTGGCTGCTGGTGTTACTTGTAGCATCTTCATAATTGAGATGTAGCTTTCTTGAGCCAACA
AGGCAGGTGTGTCTCTCTTT-----
-----
-----AGG
AAAATATGACA--CG-----ACGATCCAAATTTACTGACCAGAGAAATTTCCAGTTG-ATTACTCGTTGACATGGGA
GTCTAACAGCTA--TGGGTTTCCTTCTAAGTCCTGAGT
>Horse
TA-----TGTCACCTCGGCTGTGAGTGATACTTCTAGCATCTTTGTAATTGAGATGTAGCTT-CTTGAGCCAACG
AGGCAGATGTGTCTACTTT-----
-----
-----AAG
AAAATGGAATACATG----AAAATCC-----GAAATTTCCAGTTG-ACTACT-CGTCATACATGAG
AGTCTACAGCCAACCTGAGTTCCTTCTGAGGTCCTGAGT

```

## Marker A08

>FLAM\_A

```
-----gccgggcgcggtggcgcgcgctgtagtcccag
ctactcg-----ggaggctgaggcgggaggatcgcttgagcccaggagttcgagacc
agcctgggcaacatagcgagaccccgctctcaaaaaaaaaaaaaaaaaaaaaaaaaaaaa
-----
```

>Human

```
TTCAGTGGGAGGCCTGGGGCACAGCGTATGTGCTTCTTGAAGAGCAGCAGCAGGGCCACCA--TTGAAAGACAGGAA
ACAACAC---ATAGAGAAATTGCTGGCTCA---ggaggctgaggttaaggggattacttgagcccaggagttcaagacc
aactggggcaacatagcaagaccccatctcaaaaaaaaaaagaaataaaa---aagaaaaagaaagg---ATAGAAAAT
TTGCCTATACA---TTCCACAAAGCACAAGGATTGTCCCAGAACAACGTTCTAGACCTACTACCTAGCTCTCCAACA
GAAAGGGAACCAGCCACTCAGGCATGGCTGTTTTCTGGCCTCTCCA
```

>Chimp

```
TTCAGTGGGAGGCCCGGGGCACAGCGTATGTGCTTCTTGAAGAGCAGCAGCAGGGCCACCA--TTGAAAGACAGGAA
ACAACAC---ATAGAGAAATTGCGGGCTCA---ggaggctgaggttaaggggattacttgagcccaggagttcaagacc
aactggggcaacatagcaagaccccatctcaaaaaaaaaaagaaagaaaaaaa---aagaaaaagaaagg---ATGGAAAAT
TTGCCTATACA---TTCCACAAAGCACAAGGATTGTCCCAGAACAACGTTCTAGACCTACTACCTAGCTCTCCAACA
GAAAGGGAACCAGCCACTCAGGCATGGCTGTTTTCTGGCCTCTCCA
```

>Orangutan

```
TTCAGCGGGAGGCCCGGGGCACAGGGTATGTGCTTCTTGAAGAGCAGCAGCAGGGCTACCA--TTGAAAGACTGGAA
ACAACAC---ATAGAGAACTTGCGGGCTCA---ggaggctgaggtcaggggattacttgagcccaggaggtcaagatc
aactggagcaacatagcaagacccacctcaaaaaaaaaaaaaaaaaaaaaaaaaaagaaaaagaaagg---ATGGAGAAT
TTGCCTATACA---TTCCACAAAGCACAAGGATTGTCCCAGAACAATATTCTAGACCTACTCTCTAGCTCTCCAACA
GAAAGGGAACCAGCCACTCAGGCATGGCTGTTTTCTGGCCTCTCCA
```

>Baboon

```
TTTAATGGGAGGCCCGGGGAACAGGGTATGTGTTTTCTTGAAGAGCAGCAGCAGGGCCACCA--TTGAAAGAGAGGAA
ACAGCAC---ATAGAGAACTTGCTGGCTCA---ggaggctgaggtgagaggattacttgagcccagagttcaagacc
aactggggcaacatagcaagaccccatctcaaaaagaaaaagag-----aaagaaagg---ATGGAGAAT
TTGCCTATACA---TTCCACAAAGCACAAGGATTGTCCCAGAACAATGTTCTAGAC-----CCAGCTCTCCAACA
GAAAGGGAACCAGCCACTCAGGGGTAGCTGTTTTCTGGCCTCTCCA
```

>Rhesus

```
TTTAATGGGAGGCCCAGGGAACAGGGTATGTGTTTTCTTGAAGAGCAGCAGCAGGGCCACCA--TTGAAAGA---GAA
ACAGCAC---ATAGAGAACTTGCTGGCTCA---ggaggctgaggtgagaggattacttgagcccagagttcaagacc
aactggggcaacatagcaagaccccatctcaaaaagaaaaagag-----aaagaaagg---ATGGAGAAT
TTGCCTATACA---TTCCACAAAGCACAAGGATTGTCCCAGAACAATGTTCTAGAC-----CCAGCTCTCCAACA
GAAAGGGAACCAGCCACTCAGGCGTAGCTGTTTTCTGGCCTCTCCA
```

>Marmoset

```
TTCAGGGGGAGGCCTGGGGCACAGGGTATGTGCTTCTTGAAGAGCAGCAGAGGGGCCACCG--TTGAAAGAAAGGAA
ACATCAC---ATAGAGCACTTGCCAGCTCA---gggggctgaggttaagaggcttacttgagcccaggagttcaagacc
aatcgggacaacatagcaagaccccatctcaaaaaaaaaaaaa-----aaaggagg---ATGGAGAAT
TTGCCTACACA---TTCCACAAAGCACAAGGATTGTCCCAGAGCAGTGTCCAGCCCTGCTACCTAGCTCTCCAACA
GAAAGGGAACCAGCCATTCAAGCATGGCTGTTTTCTGGCCTCTCCA
```

>Tarsier

```
TTCAGTGGTAGTCCTGAGATGCTAGG--TGTGCTTCTTGAAGAACAGCAGCAGGGCCACCC--TTGAAAGAGAGGAA
ACATCAC---ATAGAGAACTTGCTGCTCA---ggaggatgagacaggaggatagcttgagcctgagagttcaagacc
agcctgggcaacatagtgagactcagctcagaaaaaaaaga-----aaagaaagg---ATAGAGAAC
TTGTCTGTATA---TCCCACAAAGCAGAGATCATCCCAGAACAATGTTCTGGACTTACTACCTAGCTGTCCAACA
GAAAGGG-ATCAGCCACTCAGGCATGGATGTGTCCAGTCCTCTCCA
```

>Mouse\_lemur

```
TTCAGTCAGAGTCCTGGGGAGCATGGTGTGTGCTTCTT---GAACAGTGGCAGGGCCACCG--TTGAAAGAGAGGAG
ATGTCAC-----ATA--GCAC
CTGCATGTACA---TTCCACACAGCACAGTGCTTGTCCCGGGAACAGCCTGCTGGGCCTACTGCTGAGCTCTCC----
-AACAGGGCCCAACCGCTCAGGCACGGG-TGTTCCCGGCCTCTCCA
```

>Bushbaby

TTTAGCAGGAGCCCTGAAACGCAGGGCGTGTGCTTCTT----GAATGGTGTCCAGGGCCACCA--TTGAAAGAGAGGAG  
ACATCTC-----  
-----GTA--GCAC  
CTGCCTGTACA---TTCCACGAAGTACAAGGCTCG-CCCTGAAACAGTGTTCCAGACATTCTCTCTAGCTGCCAGCA  
GAACGGGGACCTGCCACCCAGGCATGGGCTTTTCCGGGCCTCTCCA

>Tree\_shrew

CTCAG--GGAGTCCTAGGGTGCAGGGTGTGTGCGTCTC-GAGGAACAGGTTCCGGGCCA-----TTGAAAGGGAGGGG  
ACATCAC-----  
-----GGA---CAC  
TGGGCGTTACC---TTCCGCCCCGGCACAGTG--ACCCAGGAAGAAGGTTCCAGACTTGCTTCTGCGAGTCCACGA  
GAA-GGGG-CCAGCCACG-AGGCACAGACAGGCC- GACTCCTCGA

>Mouse

TCCAGTGGGAGCCCTAGGGAACAGGGT-----GTACTTGGGAGCATGGCAGCATCAGATCACCCTGAAAGA--GGTG  
CCATCCC-----  
-----AGA---GAT  
AA-CTTCATCC---TCCAACAGCACCCAGCCATCTTCCCA-----CGCTGACCACCTAGCTGCCAACA  
GCAAAAGCACCCACCACT-----CTGCCACCGCCTCTCCA

>Guinea\_pig

TTCAGC-AGAGTCCTCGGGCAGAGG-----CACCAG-GCTGCTATTTTAAAAA--GGAAA  
TTTCACC-----  
-----TAG--ATAA  
CTTTCGTGCAT---GCACACTATGCCAGCAATCCTCCCTGGA-----CTTACTATCGAGCTGCCAACA  
GGAAGGAAA-----GACCAGAGACTTCCT-----



## Marker A26

>FLAM\_A

```
-----  
-----gccggggcgcggtggcgcgcgctgtagtcccagctactcgggaggctg  
aggcgggaggatcgcttgagcccaggagttcgagaccagcctgggcaacatagcgagacccccgtctctaaaaaaaaa  
aaaaaaaaaaaaaaaa-----  
-----
```

>Human

```
TATTCTATTTTGCTAATCTTAGATTGAAAAACCTTGCAAATTGGATTGAG-CTGTGAGAAATCTCATTGCATTAAGT  
CCT--GTC---TAATCAAAACTATGAA---gccaggtgcagtggtgctgctgtagtttcagctactccagaggctg  
aggcaggaggatcccttgagcccaggagtttgaggccagcctgggcaacatagcaagattctgtctctaaaa-----  
-----ataatagtaaatgatg---TAATCAAATTAT-----TCTTGCCATATTTTGT----TTATC  
ACGGTGACT-----ATTGAGCTATTTGGCGTGAATAAGAAGAATAAGGTTAATTTCTGAGA
```

>Chimp

```
TATTCTATTTTGCTACTCTTAGATTGAAAAACCTTACAAAATTGGATTGAG-CTGTGAGAAATCTCATTGCATTAAGT  
CCT--GTC---TAATCAAAACTATGAA---gccaggtgcagcggcctgctgtagtttcagctactccggaggctg  
aggcaggaggatcccttgagcccaggagctgaggccagcctgggcaacatagcaagattctgtccctaaaa-----  
-----ataatagtaaatgatg---TAATCAAATTAT-----TCTTGCCATATTTTGT----TTATC  
ACGGTGACT-----ATTGAGCTATTTGGCATGAATAAGAAGAATAAGATTAATTTCTGAGA
```

>Orangutan

```
TGTTCTATTTTGCTAATCTTAGATTGAAAAACCTTGCAAATTGGATTGAG-CTGTGAGAAATCTCATTGCATTAAGT  
CCT--GTC---TAATCAAAACTATGAA---gccaggtgcagtggtgctgctgtagtttcagctactccggaggctg  
aggcaggaggatcccttgagcccaggagtttgaggccagcctgggcaacatagcaagagtctgtctctaaaa-----  
-----ataatagtaaatgatg---TAATCAAATTAT-----TCTTGCCATATTTTGT----TTAGA  
ACAGTGACT-----ATTGAGCTATGTGGCGTGAATAAGAAGAATAAGATTAATTTCTGAGA
```

>Baboon

```
TATTCTATTTTGCTAATCTTAGATTGAAAAACCTTGCAAATTGGATTGAG-CCATGAGAAATCTCATTGCATTAAT  
CCT--GTC---TAATCAAAACTATGAA---gccaggtgcagtggtgctgctgtagttccagctactctggaggctg  
aggcaggaggatcccttaagcccaggaatttgaggccagcct-ggcaacatagcaagattctgtctctaaaa-----  
-----ataatcgtagtgatg---TAATCAAATTAT-----TTTTGCCATATTTTGT----TTATC  
ACAGTGACT-----ATTGAGCTAGTTGGCATGAATAAGAGGAATAAGATTAATTTTCTGAGA
```

>Rhesus

```
TATTCTATTTTGCTAATCTTAGATTGAAAAACCTTGCAAATTGGATTGAG-CCATGAGAAATCTCATTGCATTAAGT  
CCT--GTC---TAATCAAAACTATGAA---gccaggtgcagtggtgctgctgtagttccagctactctggaggctg  
aggcaggaggatcccttaagcccaggaatttgaggccagcctaggcaacatagcaagattctgtctctaaaa-----  
-----ataatcgtagtgatg---TAATCAAATTAT-----TCTTGCCATATTTTGT----TTATC  
ACAGTGACT-----ATTGAGCTAGTTGGCGTGAATAAGAAGAATAAGATTAATTTTCTGAGA
```

>Marmoset

```
CATTTTATTTTGCTAATCTTAGATTGAAAAACCTTGCAAATTGGACTTAG-CCCTGAGAAATC-CGTTGCATTAAGG  
CAT--GTC---TAATCAAAACTATGAA---gccaggtgcagtggtgctgctgtagtaccagctactccagaggctg  
aggcaggaggatctcttgagaccaggagtttgaagccagtcag-----  
-----  
ACAGTGACT-----ATCCAGCCAGTTGACATG---AAGAAGAATAAGATTAATTTTCTGAGA
```

>Tarsier

```
CATTTTATTTTGTGGTCTTAGATTGAAAAACCTTGCAAACCTGAATTTAT-TCTTAAGAAATCTCATTGCATTAATT  
CCT--GTC---CAGTCAAAACAATGAA---gctggacac--tggtgctgctgtaatcccagctacttagaaggcta  
aggcagaaggatcatttgaaccaggagtttgagatcagcctgggcaacatagtagattccatctctaaaaat---aa  
taataatgatgatgataataataatg---TAATAAGACT-----GTGATACTGGCATATTTTGC----TTATC  
ACAGTGACTGACCAATCCAGCTCGTTGATGTG-----AATAAAATTAAT---CTGTGA
```

>Bushbaby

```
-----CTTAGA-TGGGAAACCTTGAAAGATCGGATTGAG-CCCTGAGAAAT-CCATTGCATTAAGT  
CCT--GTC-----  
-----  
-----TAATCAAATTAA--GGT--TCTTGCCATATTTTGC----TTATC  
AGAGGGACC-----ATCCAGCTAGTTGATGT-----GAATAAGATTTATCTTCTGAGA
```

```

>Mouse_lemur
CATTTCCTTTTTGCTGATCTTAGATTGGAAAACCTTGCAAATTGGATTGAG-CCCTGAGAAATCCCATTGCTTTAAGT
GCA--GTC-----
-----
-----TAATCACAACCTAA--GGT--TCTTGGCATATATTGC----TTATC
AGAGTGACT-----ATCCAGCTAGTCGGTGTGGATAA---GAATAAGATTAATCTTCTGAGA
>Tree_shrew
CATTTCCTTTTTACTAATCATAGATTGGAAGACCTTGCAAATTGGACTGAG-CCCTGAGAAATCCCAATATATTAAGT
CCTATGTC-----
-----
-----ATCAAAACTAA--GGC--TTTTGGTGTATCTTAC----TTATC
ACAGTGACC-----CTCTACCTCGTTGACAGGGATAAGAAGATTA-----GCCTTCTGAGA
>Mouse
TCACTGATCTTAGACTGAATAGTTTT-----GCAAATTTGGCTCATCCCTGAGAGGAATTCGATTGCATTAAGT
CCT--GTC-----
-----
-----TAATCCTAACAAA--GGA-----TTTTGACA----TGTCC
AGCCTGTG-----GCATAACGGTGAGA-----TTGACCTTTTGAGA
>Guinea_pig
TTGCTTATTTTACACTGAAAAACCTC-----CAAGGTTAGATTGAG--TGTGAGAAATCTATTGCATTAAGT
CCT--GTC-----
-----
-----TAATCAAAACAAA--GGG--CCCTAGCATGGTTTTA----TCACA
GTAGCTATC---CAGCTAGTTTGTGTGAA-----TAAGAATAAGATTAATATTGTTATT
>Dog
CATTTCCTTTTTACTGATCTTAGATGGAAAATCTTACAAGATTGGACCCAT-CCCTGAGAAATCTCATTGCCTTAAGT
CCT--GTT-----
-----
-----TAATCGAAACTAA--TGCTCTTGGCATTTTTTTTTTGTTTGTATC
ACAGTGACTACCCAGCTAATTGGTGTGA---ATAAGGAGAAACAAGCTTAATCCTCCGAGA
>Horse
TTTGTTTTTCTGATCTT--AGATTGGGAAATCTTGCAAATTGAATTCAGTCCT-GAGAAATCTCATTGCATTAAGT
CCT--GTT-----
-----
-----TTAATATAAACTAA--GG-CTCCTGGCATATTTTGC-----TTATC
ACAGTGACTACCCAGCTAGTTGGCTTGA-----ATAAGGACAATAGGCTTAATCTTCTGAGA

```

Marker A14

>FLAM\_A

-----  
-----gcccggcgcggtggcgcgcc-----tgtagtcccagctactcgggag  
gctgaggcgggaggatcgcttgagcccaggagtccgagaccagcctgggcaacatagcgagacccccgtctctaaaaaa  
aaaaaaaaaaaaaaaaaaaaa-----  
-----

>Human

TTATAATAATTGTAATCATTGG-ATTGA-CTTCA-TTAAATAGGATCCATTCT----TAAGAATCTTTCTTAGTGTTT  
TTAGATT---aaaatatctaagtacta-----acttggtggcatgcacc----agtagtcccggccacttgggag  
gctgaggcaggaggattgcttgagcccaggagttaagtccagcctgggcaacacagtgaggacccccatctctgaatta  
aaggaaaa---AAAATATCCAAGTACTC---AAAGT---GTAAGTGCTTCACAAGTATCTCCTGAT--AG--TTACT  
TAT---GGATAATCATACATTT--AT--ATCCACACTAGGCCTCTGTCAAAGTATT

>Chimp

TTATAATAATTGTAATCATTGG-ATTGA-CTTCA-TTAAATAGGATCCATTCT----TAAGAATCTTTCTTAGTGTTT  
TTAGATT---aaaatatctaagtacta-----acttggtggcatgcacc----agtagtcccggccacttgggag  
gctgaggcaggaggattgcttgagcccaggagttaagtccagcctgggcaacacagtgaggacccccatctctgaatta  
aagg-aaaa---AAAAATCCAAGTACTC---AAAGT---ATAAGTGCTTCACAAGTATCTCCTGAT--AG--TTACT  
TAT---GGATAATCATACATTT--AT--ATCCACACTAGGCCTCTGTCAAAGTATT

>Orangutan

TTATAATAATTATAATCATTGG-ATTGA-CTTCATTTAAATAGGATCCATTCT----TAAGAATCTTTCTTAGTGTTT  
TTAGATT---aaaatatctaagtacta-----acttggtggcatgcacc----tgtagtcccggccacttgggag  
gctgaggcaggaggattgcttgagcccaggagttaagtccagcctgggcaacacagtgaggacccccatctctgaatta  
aagg-aaaa---AAAATATCCAAGTACTC---AAAGT---ATAAGTGCTTCGCAAGTATCTCCTGAT--AG--TTACT  
TAT---GGATAATCATACATTT--AC--ATCCACACTAGGCCTCTGTCAAAGTATT

>Baboon

TTATAATCATTATAATCATTGG-ATTGA-CTTCATTTAAATAGGATCCATTATTACCTAAGCATCTTTCTTAGTGTTT  
TTAGATT---aaaatatctaagtacta-----acttggtggcatgcacc----tgtagtcccggccacttgggag  
gctgagacaggaggattccttgagcccagaagttaagtccagcctaggcaacacagcgagacccccatctctgaatta  
aagg--gaa---AAAATATCCAAGTACTT---AAAGT---GTAAGTGCTTCACAAGTATCTCCTGAT--AG--TTACT  
TAT---GGATAATCATACATTT--AT--ATCCACACTAGGCCTCTGTCAAAGTATT

>Rhesus

TTATAATCATTATAATCATTGG-ATTGA-CTTCATTTAAATAGGATCCATTCTTACCTAAGCATCTTTCTTAGTGTTT  
TTAGATT---aaaatatctaagtacta-----acttggtggcatgcacc----tgtagtcccggctacttgggag  
gctgagacaggaggattccttgagcccagaagttaagtccagcctaggcaacacagcgagacccccatctctgaatta  
aagg--aaa---AAAATATCCAAGTACTT---AAAGT---GTAAGTGCTTCACAAGTATCTCCTGAT--AG--TTACT  
TAT---GGATAATCATACATTT--AT--ATCCACACTAGGCCTCTGTCAAAGTATT

>Marmoset

TTATAATCATTATAATCATTGG-ATTGA-CTTCATTTAAATAGGATCCATTCTTGCCTAAGAATC---CTTAGTGTTT  
TTAGATG---aaaatatctaagtacga---gccaggcttggtggtacatatac---tgtagtcccagctacttgggag  
gctgaggcaggaggattgcttgagcccaggagttaagtccagcctaggcaacacagcaagatcccatttctgaatta  
aagg--aaa---AAAAATCCAAGTACCC---AAACT---GTAAGTGCTTCCAAGTATCTCCTGAT--AG--TTACT  
TAC---GGATAATCATATATTT--AT--AGCCACACTAGGCCTCTGTCAAAGTAGT

>Tarsier

TTCTCATCATTATAATAATTGA-TTTTAGTTTTCATTTAAATTGGATCAATTCTTACCTAAGAATC-TTCTTAGCATT  
TTAGATG---aaaatatctaagtatta---gccaggtttggtgacatgcacctacttgtagtccctactactgaggag  
actgaggtaggaggattgcttgagcccagaagtccaagtccaacctgggcaacacagcgagattctctctctaaatta  
aatgaaaa---AAAAATCCAAGTACTC---AGAGTATAATAAGTGCTTCACAGATATTTTCTGATAGAG--TTACT  
TATCATGGTTAATCTTACATTGCAAT--ACCCATATTAGGCCTCTG--AAAGTATT

>Bushbaby

TTTTAGTAATTATAGTCATTTGTTTTTA-CTTCATTTAAATAGAATAAATTCTTACCTAAGGATCTTCTTAAGATTT  
TCAGATC-----  
-----  
-----AGAATGTC-AAGTGCTC---AAAGT---ATAAGTGCTTCACAAGTATCTCCTGAT--AGAGTTACC  
TATCGCTGTTAACTGTATGTTT--TT--ATCCATAGTAAGCCTCTTTTC-AAGTATT

>Mouse\_lemur

TTCTAATAGTTATAATTGTTAGTTTTGA-CTTCATTTAAATAGAATAAATTCCTTACCTAAGAATGTTTCTTAGCATTT  
TTAGATC-----

-----AAAATGTCCAAGAACTC---AAAGT---ATAAGTGGTTTACAAGTATCTCCTGAT--AG----ACT  
TATAGTAGTTAATCTTACATTT--AT--TTCCATAGTAGGCCTCTTTCAAAGTATT

>Mouse

-----ATAAATAGGATGATGAATTCCTACCAAGAA--TCTTAACATTT  
TTAGGTC-----

-----AAAACATCCAAGTACTA--AATGT-----ACTTATATTGGATGCTTACATGCT-----TTCTA  
AGTGTCTCCTGACAGTTACAGGTCATGGGTGTGCAGTTGGCTCTGTATTAGGATTC

>Dog

TTATAATCACTATAATAATTGGTTTTGG-CTGCATTTAAATA-----CCATT  
TTGTATC-----

-----AAAATATTCATGTAGTC---AAAGT-----GTGCTTACAAGCCCCTCCTGAT--AGAGTTACT  
TATTTATCATGGTCAGTCTTATGTTTATATCCATATTAGGCCTCTTTCAAATATC

>Horse

TTGTAATCATTATAATCATTGGTTTTGA-CTTCATTTCAAAGCG-----TTT  
TTAGATC-----

-----AAAATATTCAGGTACTC---AAAGT---GTAAGTGCTTACAAGTACCTCCTGAT--AGAGTTTCT  
TATTTATCGTGGTTAATCTCGTATTTATATCTATATACGGCCTCTTTGAAAATATT

Marker A15

>FLAM\_A

-----  
-----gccgggcgcggtggcgcgcgctgtagtcccagctactcgggaggctgaggcgggaggatcgc  
ttgagcccaggagttcgagaccagcctgggcaacatagcgagaccccgctctcaaaaaaaaaaaaaaaaaaaaa  
a-----  
-----

>Human

CATCAAAAAGCCCATCTGTTCT---AAACATCTTCAGATTTTAAGGACTGAACAGAAGAAAGTTCCTAGCAGATTAC-  
-GATTTATCTTATC---aaagtgtttcattag---cctgtagtcccagctactcaggtggtggaggcggcaggattac  
atgagcccaggagtttagagaccatcctgggcaacatagagacctcatctcaaaaaaaaaaaaaaaaa-----  
-----AAAGTGTTTCATCAG---ACCGTTTCACTGATTAG---ATTTGGATCAGTGACCTTGGGGTCTTGT  
TTGTTTTGTTT-GTTTG-----GCAAAGCTACAGAAGAAA-TACAGGA

>Chimp

CATCAAAAAGCCCATCTGTTCT---AAACATCTTCAGATTTTAAGGACTGAACAGAAGAAAGTTCCTAGCAGATTAC-  
-GATTTATCTTATC---aaagtgtttcattag---cctgtagtcccagctactcaggtggtggaggcggcaggattac  
atgagcccaggagtttagagaccatcctgggcaacatagagagacctcatctcaaaaaaaaaaaaaaaaa-----  
-----AAAGTGTTTCATCAG---ACCGTTTCACTGATTAG---ATTTGGATCAGTGACCTTGGGGTCTTGT  
TTGTTTTGTTT-GTTTG-----GCAAAGCTACAGAAGAAA-TACAGGA

>Orangutan

CATCAAAAAGCCCATCTGTTCT---AAACATCTTCA-ATTTTAAGGACTGAACAGAAGAAAGTTC-TAGCAGATTAT-  
-GATTTATCTTTTC---aaagtgtttcattag---cctgtagtcccagctactcgggtggtggaggtagcaggattac  
atgagcccaggagtttagagaccatcctgggcaacatagagagacctcatctcaaaaaaaaaaaaaaaaa-----  
-----AAAGTGTT-CATCAG---ACCGTTTCACTGATTAG---ATTTGGATCAGTGACCTTGGGGTCTTGT  
TTGTTTTGTTT-GTTTG-----GCAAAGCTACAGAAGAAA-TACAAGA

>Baboon

CATCAGAAAGCCCATCTGTTCT---AAACATCTTCAGATTTTAAGGACTGAACAGAAGAAAGTTCCTGGCAGATTAT-  
-GATTTATCTTATT---aaagtgtttcattag---cctgtagtcccagctactcaggtggtggaggcagcaggattac  
ataagcccaggagtttaggaccatcctgggcaacacagagagacctcatctcaaaaaaaaaaaaaaaaa-----  
-----AGCGTGTTTAATCAG---ACCATTTCCTGATTAG---ATTTGGATCAGTGATCTCGGGGTCTTGT  
TTGTTTTGTTT-GTTTG-----GCAAAGCTACAGAAGTGG-TGCAAGG

>Rhesus

CATCAGAAAGCCCATCTGTTCT---AAACATCTTCAGATTTTAAGGACTGAACAGAAGAAAGTTCCTGGCAGATTAT-  
-GATTTATCTTATT---aaagtgtttcattag---cctgtagtcccagctactcaggtggtggaggcagcaggattac  
atgagcccaggagtttagagaccatcctgggcaacacagagagacctcatctcaaaaaaaaaaaaaaaaa-----  
-----GGCGTGTTTCATCAC---ACCATTTCCTGATTAG---ATTTGGATCAGTGATCTCGGGGTCTTGT  
TTGTTTTGTTT-GTTTG-----GCAAAGCTACAGAAGAAG-TGCAAGA

>Marmoset

CATCAAAAAGTCTATCTGTCCT---ATACATCTTCAGATTTTAAGGACTAAACAGAAGAAAGTTCCTAGCAGATTAT-  
-GATTT---TATC---aaagtgtttcattag---cctgaagtcctagctactc-----  
-----caggagtttagaggccatcctgggcaacacagagagacctcatcttaaaaag-----  
-----AAAGTACTTCATCAG---AATGTTTCACTGATACAG---ATTTGGATCA---CCCTGGAGTATTGT  
TTGTTTTA-----GCAAACCTACGGAAGAAA-TACAAGA

>Tarsier

CATAAAAAGTCTTCTGTTCTTATACAAATGTTTAGATTTTAAGGACTAAACAGAAGAAAGTTCCTAGCAATTTACA  
AGATTTCTCTTATC---aaagtgtttcatcaa---tctatagtcctagctacttgggaggttgaggcagaaggactgc  
ttgagtcaggagcttagagaccagattgagcaacatagtaagacctcgtcaccaaaaaaaaaaaaaa-----  
-----AAGGTATTTTATCAG---ACTGCTTACTAATTCAGGCATTTGGTTCA---CCTTAGAGTTTTCAT  
TTGTTTG-----GC-AAGATACAGAAAAAATGGAATG

>Bushbaby

CTTCAAAAAGCCCTCTGTCCTT---CTATATGTTTAGATTTGAAGGACTGAACAGAAGAAAGTTCCTGGTAGATTATA  
AGATTTGTCTTATC-----  
-----  
-----AAAGCGTTTCATCAG---ATCGTTTACTAATTCAGACATTTGGTTCA---CCTGCAGGTCTTGA  
TTGTTTTGTTT-GTTTG-----GCAGGGATACAGAAGAAG-TGAAA-G

>Mouse\_lemur

CATCAAAAAGCCTTTCTATCCTT--ATACATGTTTAGATTCTAAGGATTGAACAAAAGAAAGTTCCTAGCACATTATC  
AGATTTATTTTATC-----

-----AAAGTATTTTCATCAG--ACTGTTTCACTGTTTCAGACATTTGGTTCA----CCTTAAGGCCTTGA  
TTGTTTTGTTTTGTTTTGTTT-----GCAGAGATACAGAAGAAG-TGGAATG

>Tree\_shrew

TATCA-AAAGCCCTTCTGTCCTT--CTACATGTTTAGATTTTAAGGACTGAACAGAAGAAAATTCTAGAAGATTATA  
AGATTTATCTTATC-----

-----AAAGTGTTTTATCAG--ACTGTTTCACTGATTTCAGACACTTGGTTCA----CCTTAGGATCTTCT  
TTGTGTGTTTTGTTTTGTTTCTTTGGCAGAACTACAGAAGAAA-TGGAATG

>Dog

CATCAGAAAGCCTTTCTGCCCTT--AGATATGATTAGATTTTAACAACAGTACAGAAGAAAGTTTCTGGCAGATTAT-  
-AATTTATCTTGTT-----

-----AGAGTGTTTGATCAA--ACTGTTTCATTGATTTCAGACATCTGGTTTA----CCTTAGGGTTTGGT  
TT----TGTTT--TGTG-----GCAGAGCTACAGAAGAA--TGAAAA

>Horse

CATCAGA--GCCTGTCTGTCTGC--ATATACGTCTAGATTTTAAGAACCGTA-AAAAGAAAGTTCCCGGCAGATTAC-  
-AGTTTATCTTATC-----

-----GTAGTGTTTCATCAA--ACGGTTTCACTGATTTCAGACAT-TGGTTTA----CCTTAGGGTTTTGT  
TTATTTGTTTGTGTTTGTGTTTGTG--GCAGAGCTACAGAAGAAA-TGAAAAG

Marker A17

>FLAM\_A

-----  
-----gcc-gggcgcggtggcgcgcgctgtagtcccagctactcgggaggctg  
aggcgggaggatcg-cttgagcccaggagttcagaccagcctgggcaacatagcgagaccccgctctctaaaaaaaa  
aaaaaaaaaaaaaaaa-----  
-----

>Human

GTATGGAATATGCAGGTTTCAGGGGCATTTAGGCACAGGTAACATTTGACATAGTGCCCAATATGTGGAGAAGAAAA  
TGTTTTCAAAAAT---GTCGCTTCT---gcc-aggcacagtggcacacggttgtaatcctagctacttgggaggctg  
aggcag-agaatcaccttgagcccaggagttctagaccagtctgggtaacatagtgacacc-ttcatctcattacaaa  
at-----GTCCTCTTTT-----TCAAGGAAATTTGATGGGGTCTATTTGCTTCAAGA--TAAAC  
CTCACTAAACCC-AGATTTAG--TTGCTATCTGTCA

>Chimp

GTATGGAATATGCAGGTTTCAGGGGCATTTAGGCACAGGTAACATTTGACATAGTGCCCAATATGTGGAGAAGAAAA  
TGTTTTCAAAAAT---GTCCTCTTCT---gcc-aggcacagtggcacacggttgtaatcctagctacttgggaggctg  
aggcag-agaatca-cttgagcccaggagttctagaccagtctgggtaacatagtgacacc-ttcatctcattacaaa  
aa-----GTCCTCTTTT-----TCAAGGAAATTTGATGGGGTCTATTTGCTTCAAGA--TAAAC  
CTCACTAAACCC-AGATTTAG--TTGCTATCTGTCA

>Orangutan

GTATGGAATATGCAGGTTTCAGGGGCATTTAGGCACAGGTAACGTTTTGACACAGTGCCCAATATGTGGAGGAGAAAA  
TGTTTTCAAAAAT---GTCCTCTTCT---gcc-aggcacagtggcacacggttgtaatcctagctactcgggaggctg  
aggcag-agaatca-cttgagcccaggagttgtagaccagtgtgggtaacatagtgacacc-ttcatctcattacaaa  
at-----GTCCTCTTTT-----TCAAGGAAATTTGATGGGGTCTATTTGCTTCAAGA--TAAAC  
CTCACTAAACCCAGATTTAAGTTGGCTATCTGTCA

>Baboon

GTATGGAATATGCAGTTTTCCGGGGCATTTAGGCACAGGTAACATTTGATACAGTGCCTCAATATGTGGAGGAGAAGAA  
TGTTTTCAAAAAT---GTCCTCTTCT---act-aggcacagtggcacacgcttggttctagctactcgggaagcta  
aggcag-agaatcc-cttgagcccaggagttctatactagtctgggtaacatagtgacacc-ttcatctcattacaaa  
aa-----GTCCTGTTTT-----TCAAGGAAATTTGATCGGGTCTATTTGCTTCAAGA--TAAAC  
CTCACTAAACCC-AGATTTAGA--TGCTATCTGTCA

>Rhesus

GTATGGAATATGCAGTTTTTCAGGGGCATTTAGGCACAGGTAACATTTGACACAGTGCCTCAATATGTGGAGGAGAAGAA  
TGTTTTCAAAAAT---GTCCTCTTCT---act-aggcacagtggcacacgcttggttctagctactcgggaagcta  
aggcag-agaatca-ctggagcccaggagttctataccagtctgggtaacatagtgacacc-ttcatctcattacaaa  
aa-----GTCCTGTTTT-----TCAAGGAAATTTGATCAGGTCTATTTGCTTCAAGA--TAAAC  
CTCACTAAACCC-AGATTTAGA--TGCTATCTGTCA

>Marmoset

ATATGGAATATGAAGGTTGAGGGGCATTTAGGCACAGGTAACGTTTTGACACAGTGACCAATATGTGGAGGAGAA-AA  
TGTTTTCCAAAAT-----TTCTTCT---gct-aggcacagtggcatgcacttgtaatcctagctactgggaggctg  
aggcaa-agaatca-cttgagcctaggagttctagaccagccagataacataatgacacc-ttcatctcattaaaa  
aa---aaaaaaaa-----GTCCTCTTTT-----TCAAGGAAATTTTATCGGGTCTATTTGCTTTAAGA--TAAAC  
CTCACTAAACCC-AGCTTTAGA--TGCTTTCTGTCA

>Tarsier

GTATGGAGTTTCAGATTTCGTTTTGTTTCAGGCACAGCTCCGTTTTGACACAGTGCCCAATATGTGGAAGAGGAAAA  
CGTCGTCACAGAT---TCCCTCCACT---gcctgggtgtggatcatgcctgtgatcccagctactcagg-gtctg  
aggcag-a-----aggagttcaagaactgcctcactaaaactgagacc--ccatctcattaaaa  
aa---aaaa-----ATCCTCTTCT---TTTTTCATTGAAATTTGATCTAGTCTATTT-CTTCGAGAAATAGAC  
CTCACTAAACC--AGATTTAGA--TGCTGTCCGTTA

>Bushbaby

ATATGGAATTGGTAGGTTTCAGGGTAGTTTAGGCACAGGTAACGTTTTACACAGTGCCCAATATGTGGTCAAGGAAAA  
TGTCTTCAGAAAT-----  
-----  
-----TTCCTCTTCT---TTTTCAAGTAAGTTTGTAGTCTATTTGCTTCAAGAAATAAAC  
CTCCCTAAACTG-AGCTCTACA--TACTGTCTGTCA

```

>Mouse_lemur
ATATGAAATTTATAGGTTTCGAGGTTGTTTAAGCACAGGTAACATTTTACACAGTGCCCAATATGTGGAGAAGGAAAA
TGTTTTTCAGAAAT-----
-----
-----TCCCTCTTCT----TTTTCAGGTAAATTTGATCTAGTCTATTTGCTTCAATAAATAAAT
CTCACTAAACCC-AGCTATAGA--TACTTCATTATG
>Mouse
CAACCTAATGTACACATGTAGCGTTGTTTAGGCACAGGTTACGTT----ATAATACCTCAGTCTGCAGAGTAAGAAAA
TGTTTTCAAGCAT-----
-----
-----CCCACCTCAGT-----CTACTTGG-----TCGAAG--CAAGA
AACACCAAACCC-GGATTCCAATG-GT-GGGTGCCA
>Guinea_pig
GTTCTTAATTAACAAGCTCAGGGTTGTTTAGGAACAGATAACATTTT--ACAGTGCCTTGGTATGTGGAG-GAGAAAA
TGTGTTCAAACAG-----
-----
-----TGCCTCTCTTT-----TGTCAGGGAAGTCTTATCTCA-ATATTTGATTAAATAAATAAGC
CTCACTAAATCT-GGATTTAGTT--GTCATGTATCA
>Dog
GGATGGAGCT--CAGGTTTCAT-----TCAGGCA-AGATAACATTTTACGCAGTGTCCCAACTACTGGAGGAGGAAA-
TGTCTTCATAGAT-----
-----
-----CCCTTCTTTCT----TTTCAGAAAAAATTGATCTAGTTCATTTGCTTCAAGAAATAAAC
CTCACTACAGCC-AGATTTAGA--TGCTAAATGTCA
>Horse
GGATGGAACCTTAAAGGTTTCAT-----TTAGGCACAGGTAACATTTTACAAAGTGTCTAACAAGGAGAGGTGGAAAA
TGTCTTTAAAGAT-----
-----
-----CCCTTTTTCT----TTTTCAGGGAATTTGATCTAGTCCATTTGTTTTCAGGAAAGAAAT
CTCACTAAACCC-AGATTTAGAC--ACTAAATGTCA

```



## Marker A19

>FRAM

```
-----  
-----gccgggcgcggtggcgcgcgctgtagtcccagctactcgggaggctgaggcgggaggatcgcttgagc  
ccaggagttcgaggctgcagtgagctatgatcgcgccactgcactccagcctgggcgacagagcgagacccccgtctca  
aaaaaaaa-----  
-----
```

>Human

```
TGGTAC-CTTCTATCTCTTCCCTTAGAGATGCAATAAGAAATAATTTTGTAAAAGGTCACCCTCAAGAAA---TATAC  
TTTCTA---gctgggaatggtggtatgcacctgtagtcccactactaaggaggctgaggaggaagatcacttgagc  
ccaggagttcgaggctgcagtgagatgatcagccacagcactcctgcctgggcaatagagctagaccctgtcact  
aaa--atatata-----TATACTTTTCAT---GTATAAGTA-CAACATCT  
AGCTAGCCAGCCAACAAAGTTAAAACATTTATAATAATTAGTGTTGAACCTTAGAA
```

>Chimp

```
TGGTAC-CTTCTATCTCTTCCCTTAGAGATGCAATAAGAAATAATTTTGTAAAAGGTCACCCTCAAGAAA---TATAC  
TTTCTA---gctgggaatggtggtatgcacctgtagtcccactactaaggaggctgaggaggaagatcacttgagc  
ccaggagttcgaggctgcagtgagatgatcatgccacagcactcctgcctgggcaacagagctagaccctgtcact  
aaaatatatatata-----TATACTTTTCAT---GTATAAGTA-CAACATCT  
AGCTAGCCAGCCAACAAAGTTAAAACATTTATAATAATTAGTGTTGTACTTAGAA
```

>Orangutan

```
TGATAC-CTTTTATCTCTTCCCTTAGAGATGCAATAAGAAATGATTTTGTAAAAGGTCACCCTCAAGAAA---TATAC  
TTTCTA---gctgggcatggtggtgtgcacctgtagtcccactactaaggaggctgaggaggaagatcacttgagc  
ccaggagttcgaggctgcagtgagatgatcatgccacagcactcctgcctgggcaatagagctagaccctgtcact  
aaa----atatata-----TATACTTTTCAT---GTATAAGCA-CAACATCT  
AGCTAGCATGCCAACAAAGTTAAAACATTTATAATAATTAGTGTTGTACTTAGAA
```

>Baboon

```
TGGTAC-CTTCTATCCCTTCCCTTAGAGATATAATAAGAAATGATTTTGTAAAAGGTCACCCTCAAGAAA---TATAC  
TTTCTA---gctgggctggtggtgtgctcctgtagtcccactactaaggaggctgaggaggaagatcacttgagc  
ccaggagttcgaggctacagtgagatgatcatgccacagcactcctgcctgggcaatagagctagaccctgtcact  
aaa----atatata-----TATACTTTTCAT---GTATAAGCA-CAACATCT  
AACTAGCAAGCCAACAAAGTTAAAGCATTTATAATAATTAGTGTTGTATTAGAA
```

>Rhesus

```
TGGTAC-CTTCTATCCCTTCCCTTAGAGATGTAATAAGAAATGATTTTGTAAAAGGTCACCCTCAAGAAA---TACAC  
TTTCTA---gctgggctggtggtgtgacctgtagtcccactactaaggaggctgaggaggaagatcacttgagc  
ccaggagttcgaggctacagtgagatgatcatgccacagcactcctgcctgggcaatagagctagaccctgtcact  
aaa----atatata-----TATACTTTTCAT---GTATAAGCA-CAACATCT  
AACTAGCAAGCCAACAAAGTTAAAGCATTTATAATAATTAGTGTTGTATTAGAA
```

>Marmoset

```
TGGTAC-CTTCTATCTCTTCCCTTAGAGATGTAATAAG-----ATCTTGTGAAAGGTCACCCTCAAGAAA---TATAG  
T-----tggtggtgtgcacctgtagtcccactatgaaggaggctgaggaggatgatcccttgagc  
tcaggagttcgaggcttactgagaaatgatcatgccacagcactcctgcctgggcatagagctagaccctgtcact  
aaa-----ttata-----TATACTTTTCAG---GTATAAGTATTAACATCT  
AGCTAGCAGGCCAACAAAGTCAAAACGTTTATAATAATTAGTGTTGTACTTAGAA
```

>Tarsier

```
TGGT--TCTTCTCTCTCTTCTTCCAGATGTAATAAGAAACGATTTTGTAAAAGGTCACCCTCAAGAAA---TATAC  
TTTCTA---gccgtgatgatggcatggcctgtaatcccagttaacttgg-ggctgaggcaggaggatcacttaagc  
ccagaagttaaggctgcagtgagctgtgattacaccactgcacttcagcctaggtgacagagcaagacctt-tcata  
aaa-aagtattatagaaaaaatttaaaaaacaaaaggaa-----TGTGCTTTTAG---TTTTAAGCA-CAACATCT  
GACTAGCAAGCCAAGGAAGTTGAA-TATGAGTAATAATGAATATTGTGTTTAGAA
```

>Bushbaby

```
TGGTAG-GCTCTAGCTCTTCCCTTCCAGATGTAATAAGAAATGATTGTGTAAGGTCACCCTCCAGTAA-----  
-----  
-----TACACTTTTCAT---GTATAAGCC-CCACATCT  
GGCTAGCAAGCCAGCAGGGTGAAAGCATGGACGATAATTAGCATTGTGCTTAGAA
```

```

>Mouse_lemur
TGGTAC-CTTCCACCTCTTCCCCTCCAGATGTAATAAGAAATGATTTTGTAAAAATAACCTTCAAAAA-----
-----
-----TACACTTTCTT---TTATAAGCA-CAATGTCT
GGCTGGCCAGCCAACCAGGTAAAACATGTGTAATAATTAGCGTTGTACTTAGAG
>Tree_shrew
TAGAAC-TTCCTAACACTTCCTTACCAGATATAATAAAAAACAAATTT-TAAAAGGTCAGCCTCAAGAAA-----
-----
-----TATGCTTTCAT---TTATAAGAA-CAACATCT
GGTTAGCAAGCCAACACTAGGTCAAAAGATGTATAATAATTAGTG-----CTTAGAA
>Mouse
GAGCAC-CTGCTATCTCTTCCCTGTCCA-ATGCTCTAAGAAATCATTTTATAAAAGGTCATCCAGGATAAA-----
-----
-----TAGGCCTTCAT---CTGCAAGCG-CAACAGCT
GG-TAAGAAGCCAACACTACGCTAAGAAAAAAAAGGATA----ATTTGCCTTAGAA
>Guinea_pig
CCGCACTCTTCTATCTCTTCACTTCCAGATGTAGTAAAAACAATTTTGTAAACAGTTCAGTTTATAAGCA-----
-----
-----CAACATCAGGC---TGGTAAACCAATTATGCT
----AAAAGATGTAAA-ATTAA-----TATTGCACTTAGAA
>Dog
TGGTAC-TTTCTATTTCTTCCCTTCCAGTCGTAATGAAAAACGATTTTGCAAAAGGTCACTGTCCAGAAA-----
-----
-----TACACTCTCGC---TCGCATGCA-----
----ACTGGCTGGGCAGTTGTACAGTC-----ATTACCGTCACGCTCCCAA
>Horse
CAGTAC-CTTCTATTTCTTCCCTTCCAGATGTAATAAGAAATGATTTTGTAAAAGGTCACCCTCAAGAAA-----
-----
-----TATACTTTCAT---TTATAAGCA-CAGCATCT
CACTAGCGTGA-AACTAGATTGG-AGATGTATAATAGT----GTTGTGCTTCCAA

```





Marker A21

>FLAM\_A

-----  
-----gccgggCGCGGTGGCGCGCGCCTGTAGTCCCG  
ctactcgggaggctgaggcgggaggatcgcttgagcccaggagttcgagaccagcctgggcaacatagcgagacccg  
tctctaaaaaaaaaaaaaaaaaaaaaaaaaaaaa  
-----

>Human

ATCATACTTGCCAAAA-TAGTTGGTCAAAA-----AAACA-AGACAG-----GCA----GGAAAATTTTATAAG-  
-TCAGCCATGTGTATTCTAAAGTAAAATT--AAATTCTCAG---actggg-----  
-----agtctgagggtgggaggattgcttaaaccaggagtttgaggccagcctgggcaacactgcaagatcctg  
ac-ct-aaaac---athtttttt-----aaa-----TAAATTTTCAG---TAGAAGAGTATGGAT  
AGTCTGATTTGCAGAGCAGGCTCCAAAT-TTCTGATGAGCC---TTTTGAAATAGAA

>Chimp

ATCATACTTGCCAAAA-TAGTTGGTCAAAA-----AAACA-AGACAG-----GCA----GGAAAATTTTATAAG-  
-TCAGCCATGTGTATTCTAAAGTAAAATT--AAATTCTCAG---actggg-----  
-----agtctgagggtgggaggattgcttaaaccaggagtttgaggccagcctgggcaacactgcaagatcctg  
ac-ct-aaaac---athtttttta-----aaa-----TAAATTTTCAG---TAGAAGAGTATGGAT  
AGTCTGATTTGCAGAGCAGGCTCCAAAT-TTCTGATGAGCC---TTTTGAAATAGAA

>Orangutan

ATCATACTTGCCAAAA-TAGTTGGTCAA-----AAAAACA-AGA-----CA----GGAAAATTTTATAAAA-  
-TCAGCCATGTGTATTCTAAAGTAAAATT--AAATTCTCAG---actggg-----  
-----agtctgagggtgggaggattgcttaaaccaggagtttgaggccagcctgggcaacactgcaagatcctg  
ac-tt-aaaaa--aaathtttttt-----aaa-----TAAATTTTCAG---TAGAAGAGTATGGAT  
AGTCTGATTTGCAGAGCAGGCTCCAAAT-TTCTGATGAGCC---TTTTAAAATAGAA

>Baboon

ATCATACTTGCCAAAA-TAGTTGGTCAA-----AAAAACA-AGA-----CAAGCAGGAAAATTTTATAAAA-  
-TCAGCCATGTATATTCTAAAGTAAAATT--AAATTCTCAG---attggg-----  
-----aatctgagctggaaggattgcttaaaccgaagagtttgaggccagcctacacaacattgcaagatcctg  
ac-tt-aaaaa--tatthtttttg-----gaa-----TAAATTTTCAG---TAGAAGAGTATGGAT  
AGTCTGATTTGCAGAGCAGCCTCCAAAT-TTCTGATGAGCC---TTTTGAATTAGAA

>Rhesus

ATCATACTTGCCAAAA-TAGTTGGTCAAAA-----AAACA-AGACAA-----GCA----GGAAAATTTTATAAAA-  
-TCAGCCATGTATATTCTAAAGTAAAATT--AAATTCTCAG---attggg-----  
-----aatctgagggtggaaggattgcttaaaccgaagagtttgaggccagcctacacaacattgcaagatcctg  
ac-tt-aaaaa--aatthtttttg-----aaa-----TAAATTTTCAG---TAGAAGAGTATGGAT  
AGTCTGATTTGCAGAGCAGGCTCCAAAT-TTCTGATGAGCC---TTTTGAATTAGAA

>Marmoset

ATCATATTTTGCCAAAA-TAGTTGGTCAGAA-----AAGAA-AAA--G-----ACA----GGAAAATTTTATAAAA-  
-TCAGCTATGTTTATTCTAAAGTAAAATT--AAATTCTCAG---actggg-----  
-----agtctgagggtgggaggattgcttaagcccagaaatttgatgccagcctgggcaacattgcaagatcctg  
ac-tc-taaaaaatahttttttttaatcthttttaaaa-----TAAATTTTCAG---TAGAAGGGTATGGAT  
AGTCTGATTTGCAGAGCAAGCTCCAAAT-TTCTGATGAGCC---TTTTCAATTAGAA

>Tarsier

ATCATATTTTGCCAAAA-CAGTTGATTTTAA-----AAAAACAGGCAG-----GCA----GAAAAA-TTTTATAAAA-  
-TTAGCCTTGTTGACACCAAAG-----T---AAACTCTCAG---gttgggcatggtggcatgcatctgtagtcccag  
ctacttgaaactctggggtgaaaggattgcttgagttcaggagtttgatgccaccctgggcaacatagtgagaccccc  
at-cthttaaaacaaaatctcaa-----aaacaaaaaaciaa---AAAAGTCTCAG---TAGATGAGTATGGAT  
AGTCTGATTTGCAGTGCAGGCTCCAAAT-GCCTGATGAACA---GTCTGAATTAGGA

>Bushbaby

ATTGTATTTTGCCAAATACATTTGGCCAACAGCAACAAAAG-AACGTA-----GCA----GGAAAA-TTTTATAAAA  
CTTGGCCTTGCTTACTCTAAAGTAAAAT-----  
-----TAGATCCTCAG---TAGAGAACTATGGAT  
AGTCTGATTTGTAGGCCAGGCTCTATATGGTCTGCTGAACAAATATTAGAAAAAGAA

```

>Mouse_lemur
ATCATATTTGCCAAAT--AGTTGGCCCAAATCAACAAAAA-AAGGTA-----ACA----GAAAAA-TTTTATAAA-
-TTAGCC-TGTTTACTCTAAAGTAAAAT-----
-----
-----TAAATCCTCAG---TAGAAAATATGGAT
AGTCTGATTTGCAGGGCAGGCCTCAAAT-GTCTGATGAACA---GTTTG-----
>Tree_shrew
ATCATATTTGCCAAA--TGGTTGATTTT-----TAAAAAC-AAATTACGGTCAGGCA----GGAAAA-TTTTATGAA-
-TCAGCC-TATTTATGCCAAAGTAAAAT-----
-----
-----TAAATCTT-AG---TAGATAAGTGTGGCT
AATTTAATTTGCAGAACAA--TCTACAC-GTGTGATTAATA---GTTGGAATTAGTA
>Mouse
ATAGCATTCTCAAAA-ATGATTTGTTAAA-----AAAAT-AAAATGCATGCAGGCAAGCGGAAAGA-TTTTATAAA-
-TCAGCCTTGTTTACTCTGAAGTAAAAT-----
-----
-----TAAATTCTCAA---TAAAAGAGTATAGAT
AGTTTGATTTGCAGAGCAGGTTCCAAAT-GTCAGATGAACA---GTTCAAATTAGGC
>Guinea_pig
ATCATATTTGCCAAGG-TAGTTGCTAAA-----GACAGAAC-AAAATACAGAAAG----GTGGAACAT-TTTTATAAA-
-TCAATCTTGTCCTACTCTAAA-----
-----
-----T-----TCTCAG---TAGAAGAATACAAAT
GGTCTGATTTGCAGAACAGGATTTAAAT-GTGTGAGGAACA---GTTT-----
>Dog
GCAACATTTGCTACAA-TAGTTGGTCAAAAAAATT--GGC-AGA-----CA-AAAAGAAAA-TTTTGTATA-
-TCAGCCTTGTTTACCCTAAAGTAAAAG-----
-----
-----TAAATCTC-AG---TAGAAAAATATGGAT
AGTCTGGTTTACAGAACAGGCTCCAAAT-GTGTGATAAACA---GTTACAGTT---A
>Horse
GCAATATTTGCTAAAA-TAGTTGGTCAAAAAAAGAAGGC-AGA-----CAGGAAGGAAAA-TTTGATAAA-
-TCAGCCTTGTTTACTCTAAAGTAAAAT-----
-----
-----TAAATTCTCCA---TAGAAGAGTATGGAT
AGTCTGATTTGCAGAGCAGGCTCCAAAT-GTCTGATGAATA---GTTATAGTTAGGA

```

## Marker A16

>AluJb

```
-----  
-----ggccggggcgcggtggctcacgcctgtaatcccagcactttgggaggccg  
aggcgggaggatcacttgagcccaggagttcgagaccagcctgggcaacatggtgaaaccccgtctctacaa-----  
-----aaaatacaaaaattagccgggctggtggcgcgccctgtagtcccagctactcgggaggctgaggcagg-a  
ggatcgcttgagcccgggaggctcaggctgcagtgagccgtgatcgcgccactgcactc-----  
-----cagcctgggcgacagagcgagaccctgtctca-----  
-----
```

>Human

```
GGAAGAGGGTAGGTATAGTAGGTGAGAGTATCATGATATAGACACCAATTATGTTCTTTTTCAAAGGTCCAGGGAATT  
--AAAATTAAT---GTAGAATTCTT---ggccggggcaccatggctcatgcctgtaatcccagcactttgggaagcta  
aggcaggaggggttgcttgaggccaggagttcgagaccagcctgg-caacgtagtgagaatgcatctctacaa-----  
---aaaataaaattataattagccaggcatggtggcacatgcctgcagtcccagctacttgggatgctgaggcagg-a  
ggatcacttgagcccaggagtttgaggctgcagtgagttgtgattgtgtcactgcactc-----  
-----cagccagggtgacagagtgcagaccgtgtcttt---aaaagaaaagaaaaagaaaaaaagga---AAA  
AAAGTCTAGGGC---CAAGAC---ATCCTAACCGAGATGTTAAGATGGGGTCCAATCAAATTACTTGAGGGATAT-G  
GTAAAGGGCTGGAGCATGGGCCTACTGCTC
```

>Chimp

```
GGAAGACGGTAGGTATAGTAGGTGAGAGTATCATGATATAGACACCAATTATGTTCTTTTTCAAACGGTCCAGAGAATT  
--AAAATTAAT---GTAGAATTCTT---ggccggggcaccatggctcatgcctgtaatcccagcactttgggaagcta  
aggcaggaggggttgcttgaggccaggagtttgagaccagcctgg-caacgtagtgagaatgcatctctacaa-----  
---aaaataaaattataattagccaggcatggtggcacatgcctgcagtcccagctacttgggatgctgaggcagg-a  
ggatcacttgagcccaggagtttgaggctgcagtgagttgtgattgtgtcactgcactc-----  
-----cagccagagtgcagagtgagaccgtgtcttt---aaaagaaaagaaaaagaaaaaaagga---AAA  
AAAGCCTAGGGC---CAAGAC---ATCCTAACCGAGATGTTAAGATGGGGTCCAATCAAATTACTTGAGGGATAT-G  
GTAAAGGGCTGGAGCATGGGCCTACTGCTC
```

>Orangutan

```
GGAAGAGGGTAGGTATAGTAGGTGAGAGTATCATGATATGGACACCAATTATGTTCTATTCAAACGGTCCAGGGAGTT  
---AAAATTAAT---GTAGAATTCTT---ggctggggcaccgtggctcacgcctgtaatcccagcactttgggaagcca  
aggcaggaggggttgcttgaggccaggagttcgtagaccagcctgg-caacgtagtgagaatgcatctctacaa-----  
---aaaataaaattataattagccaggcatggtggcacagcctgcagtcccagctacttgggatgctgaggcagg-a  
ggatcacttgagcccaggagtttgaggctgcagtgagttgtgattgtgtcactgcactc-----  
-----cagcctgggtgacagagtgcagaccatgtcttt---aaaagaaaaaa-----gg---AAA  
AAAGTCTAGGGC---CAAGAC---ATCCTAACTGAGATGTTAAGATGCAGTCCAATCAAATTACTTGAGGGATAT-G  
GTAAAGGGCTGGAGCATGGGCCTACTGCTC
```

>Baboon

```
GGAAGA-GGTAGGTATAGTAGGTGAGAGTATCATGATATAGACACCAATTATCTTCTTTTTCAAATGGTCCAGGGAATT  
--AAAAGTTAAT---GTAGAATTCTT---ggctggggcaccgtggctcacgcctgtaatcccaacactttgggaagcca  
aggcaggaggggttgcttgaggccaggagtttgagaccagcctgg-caacacagcgagaatgcatctctacaa-----  
---aaaataaaatgataattagcca-----cacagcctacagtcccagctacttgggatgctgaggcagg-a  
ggatcacttaagcccaggagtttgaggctgcagtgagctgtgattgtgccactgcactc-----  
-----cagcctgggtgacagagtgcagccatgtcttt---aaaagaaaagcaaaagaataaa--gga---AAA  
AAAGTCTTGGGC---CAAGACTTCCATCCTAACCAAGATGTTAAGATGGAGTCCAATCAAATTACTTGAGTGATAT-G  
GTAAAGGGCTGGAGCATGGGCCTACTGGTC
```

>Marmoset

```
GGGATAGGGTAGGTATAGTAGGTGAGAGTATCAGGATATAGATACCAATTAT-TCATTTTTCAAATAGTACAGAGAATT  
--AATAATTAAT---GTAGAATTCTT---agctgggcatggtggctcatgcctgtaatcccagcactttgggaagcca  
agacaggcaagttacttgaggccaggagttcgagaccagcctgg-caacaaagcaagaatccatttcttccaaaataa  
aataaaaataaaaataaaaattaacctggagtggtggcacatacctgcagtcccagttacttgggatgttgaggcagg-a  
ggatggcttgagcccaggagtttgaggctgcagtgagctgtgattgtgccactgaactc-----  
-----cagcctgggtaacagagcaagaacatgtcttt---aaaagaaaagaaaata-----  
-AACTCTTGGGC---CAATACTTCCATCCTAACTGAGATGCTAAGATGGAGTCTAATCAAATTACTTGAGGGATAT-G  
GTAAAGAGCTGGAGCATGGGCCTACTGGTC
```

>Tarsier

GGGAGAGACTAGATGTAGTAGATCAGGGCATCAGGATACAGAGACCAATTAGGTTATTTTTCAAATGGTCCAGGGAATG  
CAAACATGAAT--ACAGAAATCTT--gggcctagcatgtaagctcatgcctgtaatcctagcattttggaaggctg  
agacaggagggtagcttg-----aggagttttaggccagcctggacaatagagcaagaccctatctctaca-----  
---aatataaaataa-aattagctgagcttgctgggtgagcctatagttatagttacatgagagattgaagtgtgta  
ggattgcttaagtccaggagttcaaggctgcagtgagcaatgatcacatcactctactc-----  
-----cagcctgggtgacagaataagaccctgtctctcaacaaaaaaaaaagaaaagagaaata--ata---AAA  
GAAGCCTTGGAC---CAGTGGAT-----GAGAGGTTATGATGAAGTGTGATCAAATTATCTGAGGGCTATGG  
GTGAAGAACTGGCACAC-AGCCTGCTGGTC

>Bushbaby

GGGAG-----AGGCATAGTAGGTGAGGGTGTCAAGGTACAGATATCAACTATCTTATTTTTCAAATGGTCCAGGGGATA  
CAAATTATTAAT-----

-----ACA  
GAAATCTTGGGC-----TTGAGATTAGGATGG-----AATTATTTGAGGAATGAGG  
GTGAAAGGCTGGAGCACAGACCTGCAGCTC

>Mouse\_lemur

GGGAGAGGGCAGGTTTTAGTAGGTAAGGGGGTCAAGATACAGATATCAACTATCTTATTTTTCAAATGGTCCAGGGAATT  
CAGAACATTAAT-----

-----ACA  
GAAATCTTGGGC-----GAGAGACTGGG-----CTGGAATTATTGAGGAATGTGG  
GTGAAGGGCTGGAGCACGGGCCGGCAGGTC

>Dog

-----GA-----TGGGAGTGTGAGGATATAGACAC---TAATGTTATTTTTCAAGTGGTGCAAGGGATG  
CAAAAAATTC-----

-----ACA  
GGCCAATGCACA-----GGATGTAACCTTGACCAAATTACTTGAGGGATACAG  
GCAAAGGGCTGGAGCACACGCCTACTGGTT

>Horse

GGGAGACAGTAGA-----CAGGAGTCTCAGGATATGGATACTA-TTACATTATTTTTAAAGTGGTCCAGGGGACG  
CAAATATTAAC-----

-----ACA  
AAGTCCTTGGGC---CAATGGAT-----GGGAGGTTAGGATGTAATCTGACCACATTATTTGAGGAATGCAG  
GTGAGGG-CATGAGCACAGGCCTACTGGTC



## Marker A29

>AluSx

```
-----  
-----ggccggggcgcggtggctcacgcctgtaatcccagcactttgggaggcc  
gagg-cgggscggatcacctgaggtcaggagttcgagac-cagcctgg-ccaacatggtgaaaccccgtctctact-aa  
aatatacaaaaattagccgggscgtgggtggcgcgccctgtaatcccagctactcgggaggctgaggcaggagaatcgct  
tgaacccgggaggc-ggaggttgagtgagccgagatcgcgccactgcactccagcctgggscgacagagcgagactcc  
gtctcaaaaaaaaaaaaaaaaaaaaa-----  
-----
```

>Human

```
AAGGTGAGATTAAACAT--GAAGAAAAGGTCAGGA--CTGGAA--CCAT-CCAGATTTTATACCAATG-TCCAG-AAG  
TCTCCATCTAAAAAT---AAGATGGTA---ggctggggtgaggtggctcaggcctgtaatcccagcactttgggaggcc  
aagg-ccagtgatcacttgaggtcaggagtttgagac-cagctctgg-ctagcatggtgaaaccccgtctctaccaa  
aatatacaaaaattagctgggtgtgggtggcgcgctgactgtaatcccagctactcgggaggctgaggcaggagaattgct  
tgaacctgggagggt-ggaggtagcagagagccaagattgcaccactgcactccagcctgggcaacagagtgagactct  
atctc-aaaaaaaaataaaaagaaaa-----  
-----AGAAGATGGTA---TTTTAGAGATAATAAATGCAACAACAGATAAAGTCCCTAGTCAACT---GATA-AA  
AAAAGAATAAATTTTGAA----CT
```

>Chimp

```
AAGGTGAGATTAAACAT--GAAGAAAAGGTCAGGA--CTGGAA--CCAT-CCAGATTTTATACCAATG-TCCAG-AAG  
TCTCCATCTAAAAAT---AAGATGGTA---ggctggggtgaggtggctcaggcctgtaatcccagcactttgggaggcc  
aagg-ccagtgatcacttgaggtcaggagtttgagac-cagctctgg-ctagcatggtgaaaccccgtctctaccaa  
aatatacaaaaattagctgggtgtgggtggcgcgctgactgtaatcccagctactcgggaggctgaggcaggagaattgct  
tgaacctgggagggt-ggaggtagcagagagccaagattgcaccactgcactccagcctgggcaacagagtgagactct  
atctcaaaaaaaaaataaaaagaaaa-----  
-----AGAAGATGGTA---TTTTAGAGATAATAAATGCAACAACAGATAAAGTCCCTAGTCAACT---GATT-AA  
AAAAGAATAAATTTTGAA----CT
```

>Orangutan

```
AAGGTGAGATTAAACAT--GAAGAAAAGGTCAGGA--CTGGAA--CCAT-CTAGATTTTATACCAATG-TCCAG-AAG  
TCTCCATCTAAAAAT---AAGATGGTA---ggctggggtgaggtggctcaggcctgtaatcccagcactttgggaggcc  
aagg-ccggtggtatcacttgaggtcaggagtttgagac-cagctctgg-ctagcatggtgaaaccccgtctctaccaa  
aatatacaaaaattagctgggtgtgggtggcgcgctgactgtaatcccagctactcgagaggctgaggcagcagagaactgct  
tgaacctgggaggc-ggaggtagcagacagccaagattgcaccactgcactccagcctatgcaacagagtgagactct  
atctc-aaaaaaaaataaaaagaaaa-----  
-----AGAAGATGGTA---TTTTAGAGATAATAAATGCAACAACAGATAAAGTCCCTAGTCAACTAGGGATA-AA  
AAAAGAATAAATTTTGAA----CT
```

>Baboon

```
AAGGTGAGATTAAACAT--GAGGAAAAGGTCAGGA--CTGGAA--CCAT-CTAGATTTTATACCAATG-TCCAG-AAG  
TCTCCATCTAAAAAT---AAGACGGTA---ggctggggtgtgggtggctcaggcctgtaatcccagcactttgggaggcc  
aagg-ctggtggtatcacttgaggtcaggagtttgagac-cacctctgg-ccagcatggtgaaatcccgtctctaccaa  
aatacacgaaattagttggatgtgggtggcgactgtaatcccagctactcgggaggctgaggcagagaagaattgct  
tgaacctgggagat-ggaggtagcagtgagccaagaatgcgccactgcactccagcctgggcaacagagcgagattcc  
atctc---aaaaaagaaaaagaaaa-----  
-----AGAAGATAATA---TTTTAGAGATAATAAATGCAGCAACAGATAAAGTCCCTAGTCGACT---GATA-AA  
AAACGAATAAATTTTGAACCTTCT
```

>Marmoset

```
AAGGTGAGATTAAACAT--GAGGAAAAGGGCAGGA--CTGGGAACCCAT-CTAGATTTTATACCAATGCTCCAGAAAG  
TTTCCATCTAAAAAT---AAGATGGGG---ggccggggtgtgggtggctcaggcctgtaatcccagcactttgggaggcc  
aaggcccggtggtatcacttgaggtcaggagtttgagacgcagctctggccagcatggtgaaactccagctcgggtcaca  
aa-----gtagcacgcggcagctgactgtaattccagctccttgggaggctgaggcacaagaatcgct  
tgaacctgggaggcaagaggttacactgagccaatcaacgacactgcactccagcctggatgacagagtgagattcc  
atctc---aaaaat---ataaaa-----  
-----ATAAGATGGTA---TTTTAGAGATAATAAATGCAACAACAGATAAAGTCCCTAATGGACT---GATATAA  
AAAGGAATAAATTTTGAA----AT
```

```

>Tarsier
AACGTGAGATTAA--AT--GAGGAAAAGGGCAGAA--TTGGAA--ACATCCTAGATTTTACACAAATGCTCCAG-AAG
TCTCCATCTAAAACT---AAGATGT-----ggcccgggtggtgggtcatgcctgtaatcccaacactttgggaggct
gagc-tggaaggattgcctgagaccaggagttcgagac-cagcctag-gcaacaaagcgagaccttgtctctacaaa
a--aaaaaaaatttagctgggtgaagtggcacacacctgtagtaccagctactcgagtagctgagacaggaggatcact
tgagccctggagct-cgaggctgtagag-gctgtgagcgtgcccgtgcactccagcctgggtgacagagtggagaccg
actca-aaaaggaaagcaaagtaaa---caagtaaataaatatataaatatttatacatcacacacacacactca
cacat---ACATGACAGTA---TTTTGGAGATAATAAATGCAACAACATACAAAGCCCCTAATTAAC---GATATT-
---AAAATAAATTTTTAG----CT
>Bushbaby
AAAGGG-----GAAATTAAGGAAAAGGGGGGAGGATTGGAA--CCATCCCATATTTTATACTAACAGTCCAG-AAG
TTCATATCTAAAAAT-----
-----
-----
-----
-----
-----AAGA--TGGTA---TTTTGGAGATAATAAACACAACAATATATAAGGTCCTCGTTCACG---GATAT--
--AAAATAAATTTTTAG----TT
>Mouse_lemur
AATGGGAGATTAAAAATGTGAGGAAAAGGGTAATG---CCGAA--CCATCCTAGATTTTATACTAATGCTCCAG-AAG
TCTCCATCTAAAAAT-----
-----
-----
-----
-----ATGAC--AGTA---TTTTGGAGGTAATAAATGCTACAACATATAAGGTCCTAGCTGATA---GA-----
--AAAACAAATCTGTGG----CT
>Tree_shrew
-----CCAG-AAG
TCTCTAAGTAAAAAT-----
-----
-----
-----
-----AAGA--TGGTA---TTTCAGAACATATAAAAATAAGA-----TGGTATTTTCAG-----
--AAAATAAATTTTTTAA----TT
>Dog
AACGTGTACTTAAATAT--GAGGAAAAGAAAAGAA--TTGGAA--CCATCCAGATTTTATACTAGTCTTCCAG-AGT
TCTCCATCTAAAAAT-----
-----
-----
-----
-----AAAA--CGGTA---TTTTGGCTACAATAAATGTGACAACATATAAGGTCCTCAGCTGATT---GATAT--
--AAAATAAATCTTTAG----CT

```

## Marker L06

>L1PB4\_3'-End

```
-----tgtttatcgcagca
ctattcacaatagcaaagatatggaatcaacctaagtgtccatcaatggatgactg-----
----ga-taaagaaaatgt-gg-tatatatac-----accatggaataactact
cagccataaaaaagaatgaaatcatgtcttttgcagcaacatggatggaactggaggccattatcctaagtgaaataa
ctcagaaacagaaagtcaaataccgcatgttctcacttataagtgggagctaaacaatgkgtacacatggacatacag
agtggaataatagacactggagactcmgaaaggt-gggaggggtgggaggggggtgagggatgagaaattacctawtgg
gtacaatgtacactattcgggtgatggktacactaaaagcccagacttcaccactacgcaatatatccatgtaacaaa
actgcacttgtacccccctaaatctataaaaaataaaaaa-----
-----
```

>Human

```
TTTAACAGACTCAAGTCCCTTCTGTTCTTATTGCCAATATCCTGCCAAGCAGAAGAACAGATCTTCTTT--CTTTCCC
ACCTT-----ATGCACCCTGCCCTGAGCAGCCTGGAATATTTAGGAAGCTGGC---AATAAAAAGATCATC
T---gaataaagagaatgtaggatacatatac-----acaatgtaataactaaa
cagtcataaaaa-ga-taaaatcatgtcttttgcagcaacatggatggaactggagaccattatcttaagtgaaataa
ctcagaaatggaaagtgaagtattgcatgttctcagttacacgtgagagctaaataatgtacacctggacattgac
cgcgaaataatagacactggagacttggagagt-gcgagagtgggaggtgggtaaggg-tgagaaattacctaattgg
gcacaatgtatactatttggatcatgactacactaaaaccctagacttcactacctccaatatatccatgtaacaaa
actgcacttgtactccttaaatctataaaaaatgaa----AAATAAAAATCAAA-----GATCATCTGGGACACT--
TCCAC-AGCAGTATTGTTCTACTGAAAAGTGGGTGAG-AGACTCCAACCTTCTTAAAAGTGCCTGTCTTA---GTTGGA
GGTGAGAAAGGACCCCCACAGAGAAACACCTCTTTAACT
```

>Chimp

```
TTTAACAGACTCAAGTCCCTTCTGTTCTTATTGCCAATATCCTGCCAAGCATTAGAACAGATCTTCTTT--CTTTCCC
ACCTT-----ATGCACCCTGCCCTGAGCAGCCTGGAATATTTAGGAAGCTGGC---AATAAAAAGATCATC
T---gaataaagagaatgtaggatacatatac-----acaatgtaataactaaa
cagtcataaaaa-ga-taaaatcatgtcttttgcagcaacatggatggaactggagaccattatcttaagtgaaataa
ctcagaaatggaaagtcaagtattgcatgttctcagttacaagtgagagctaaataatgtacacctggacattgac
cgtgaaataatagacactggagacttggagagt-gcgagagtgggaggtgggcaaggg-tgagaaattacctaattgg
gcacaatgtatactatttggatgatgactacactaaaaccctagacttcactacctccaatatatccatgtaac-aa
actgcacttgtactccttaaatctataaaaaatgaa----AAATAAAAATCAAA-----GATCATCTGGGACACT--
TCCAC-AGCAGCAGTGTCTACTGAAAAGTGGGTGAG-AGACTCCAACCTTCTTAAAAGTGCCTGTACTA---GTTGGA
GGTGAGAAAGGACCCCCACAGAGAAACACCTCCTTAACT
```

>Orangutan

```
TTTAACAGACTCAAGTCCCTTCTGTTCTTATTGCCAATATCCTGCCAAGCAGAAGAACAGATCTTCTTT--CTTTCCC
ACCTT-----ATGCACCCTGCCCTGAGCAGCCTGGAATATTTAGGAAGCTGGC---AATAAAAAGATCATC
T---gaataaagagaatgtaggatacatatac-----acaatgtaataactaat
cagtcacaaaaa-ga-taacatcatgtcttttgcagcaacatggatggaactggagaccattatcttaagtgaaataa
ctcagaaatggaaagtcaagtattgcatgttctcagttacaagtgagagctaaataatgtacacctggacattgac
cgcgaaataatagacactggagacttggaggggt-gcgagagtgggaggtgggtaaggg-tgagaaattacctaattgg
gcacaatgtatactatttggatgatgactaaaactaaaaccctagacttcactacttccaatatatccatgtaacaaa
actgcacttgtgctccttaaatctataaaaaatgaa----AAATAAAAATCAAA-----GATCATCTGGGACACT--
TCCAC-AGCAGTAGTATTCTACTGAAAAGTGGGTGAG-AGACTCCAACCTTCTTAAAAGTGCCTGTCTTA---GTTGGA
GGTGAGAAAGGACCCCCACAGAGAAACACCTCCTTAACT
```

>Baboon

```
TTTAACAGACTCAAGTCCCTTCTGTTCTTATTGCCAATATCCTGCCAAGCAGAAGAACAGATCTTCTTT--CTTTCCC
ACCTT-----ATGCACCCTGCCCTGAGCAGCCTGGACTATTTGGAAAGCTGGC---AATAAAAAGATCATC
T---gaataaagagaatgtaggatacatatac-----acaatataataactaat
cagttataaaaa-ga-taaaatcatgtcttttgcagcaacatagatggaactggagaccattatcttaagtgaaataa
ctcagaaaaggaaagtcaaatattgcatgttctcagttataagtgagagctaaataatgtacacctggacatagac
agcaaaataatagacactggagacttggaggggt-gcaagagtgggaggtgggtaagggatgagaaattacctaattgg
gtacaatgtatactatttggatgccgactacactaaaaccctagacttcactacttcccgatatatccatgtaacaaa
actgcacttgtactccttaaatcgacaaaaatgaa----AAATACAAATCAAA-----GATCATCTGGGACACT--
TCCAC-AGCAGTAGTATTCTATTGAAAAGTGGGTGAG-AGACTCCAACCTTCTTAAAAGTGCCTGTCTTA---TTGGA
GGTGAGAAAGGACCCCCACAGAGAAACACCTCCTTAACT
```

>Rhesus

```
TTTAACAGACTCAAGTCCCTTCTGTTCTTTATTGGCCAATATCCTGCCAAGCAGAAGAACAGATCTTCTTT--CTTTCCC  
ACCTT-----ATGCACCCTGCCCTGAGCAGCCTGGACTATTTGGAAAGCTGGC---AATAAAAGATCATC  
T---gaataaagagaatgtaggatacatatac-----acaatataataactaaa  
cagttataaaaa-ga-taaaatcatgtcttttgcagcaacatagatgggaactggagaccattatcttaagtgaataa  
ctcagaaaaggaaagtcaaatattgcatgttctcagttataagtggagagctaaataatacgtacacctggacatagac  
agcaaaataatagacactggagacttggagggt-gcaagagtgaggaggtgggtaagggatgagaaaattacctaattgg  
gtacaatgtatactatttggatgctgactacactaaaaccccagacttcactacttcccgatacatccatgtagcaaa  
actgcacttgtactccttaaatcgacaaaaattaa-----AAATACAAATCAA-----GATCATCTGGGACT--  
TCCAC-AGCAGTAGTATTCTATTGAAAAGTGGGTGAG-AGACTCCAACCTTTCTTAAAAGTGCCTTGTCTTA----TTGGA  
GGTGAGAAAAGACCCCCACAGAGAAAACACCTCCTTAACT
```

>Marmoset

```
TTTAACAGATTTAAAGTCCCTTCTGTTCTTTGTTGCCAATATCCTGCCAAGCAGAAGAACAGATCTTCTTT--CTTTCT  
ACCTT-----ACGCACCCTGCCCTAAACAGC-TGGAATATTTCAGGAAGCTGGC---AATAAAAGACCAT-  
T---gaataaagaaaatgcagga--catacac-----acaatataataactaat  
cagtcataaaaa-gg-taaactcatgtattttgcagcaacatggatgggaactggagaccattatcttaagtgaataa  
ctcagaaatggaaagtcaaatattccatgttctcagttataagtgagggtgaaataataattacacctgggcacagac  
agcaaaataatagacaatggagacgtggaaggggtgggagagtgagaggtgggtaagggatgagaaaattacctaattgg  
gtacagtgtagcagttttggatgatggctacactaaaaccccagacttcggtactccccgatataccatgtaacgaa  
actgcacttgaactccttaaacctaaaaatattaac-----AAATACAAATACAA-----GATCCTCTGGGACGCT--  
TCCACCAGCAGCAGTGTCTACCGAAAAGTGGGTGAG-AAACTCCAACCTTTCTTAAAAGTGCCTTGTCTTA---GTTGGA  
GGTGAGAAA-----CACAGAGAAAACCCCTCCTTAATT
```

>Tarsier

```
-----CGAATCT-TTCTGTTCTTTTTGCTAATATCCTGCCAAGCAGAATATTAAATTTTCTCAAATTTTCTC  
ACCTTTGACCCTGAACAGATGCACCCGACCCTGAACAGA-TGGAATATTTGGGAAGCCGGC---AATAAAAGATCATT  
T---ggataaaaatgtggagtatacatatattttatatatttctatttttatatgtatataaaaatagaataactact  
cagccacaaaaataa-tgaaatcaggttggtttgcagcaacatggatggaactagagaccattacctaagtgaataa  
tgca--aatagaaattcaaataccacatgttctcagctgtaagtgagggtgaaataatgtacacatggacgtacag  
agtgggaataacaga-actgggagactcagaaggat-----agaaggggatgagggatgagaaattacttaaggg  
ataccgtgcatattatgtgggtaatggtttacactaaaaccccagacttcac-attaacaatagatctgtgtaacaaa  
actgcatttgtactccctaaatctacataaataaa-----ACA-ATAAA-----TATATTCTGGGACTCT  
TCCATAAGCAGTGGTGTCTACTGGAAAGCAGGTGAGGAAACATCAATTTCTTAAAAGTGCCTTTCCGA---ACTGGA  
GGTGAGCAAGGACACCCACAGAAAAACCCCTCCTTAACT
```

>Bushbaby

```
TTTGACAGTCTCAAATCCCTTCTGTTTTTATTGTCACTATCCTGCTAAACAGAAGAACAGAACTCTTT--CTTTCTC  
ACCTT-----GCATGTCTTACCCTGAAGTGT-TGGAATATTTGGGAATTGTT-----  
-----  
-----  
-----  
-----  
-----  
-----AATAAA-----AAA-----TCATCTGAGGTACTCT--  
TCTACCAGCAATAGTGTCTACTGGAAGGTGG-CCAG-GGGCTCCAGCTTCTTAAAAGTGCCTTGTCTTA---GTTGGA  
GGTGAGCAAAGATTTTTGCAGAGAAAACCCCTCCTATTT
```

>Mouse\_lemur

```
TTTAACAGGCTCACATTCTTTCTGTTCTTTATTGGCCAATATCCTGCCAAGCAGAAGAACAGCTCCTTTTT--CTTTCTC  
GCCTT-----GCACACCTTACTCTGAAGGGC-TAGCATATTTGGGAAGCTGGT-----  
-----  
-----  
-----  
-----  
-----  
-----ATTAATA-----AAA-----TAGTCTGAGACTCT--  
TCCACCAGCAATAGCATTCTGCTCGAAGGTGGGTGAG-GGACTTCAACCTTCTTAAAAGTGCCT-TCTTAAAAGTTGGG  
GGTGAGCAAAGACCTTCATAGAGAAAACCCCTCCTTCGCT
```

>Tree\_shrew

TGGGACACGCTCATATTCTTTCCATTCTCATTGCTGATATCCTTCCAAGCAGAAAAATAGCTCCT-TTC--CATCCCT  
ACCTC-----ACATACCATATCCTGAAGGTC-TGGGGCTTTCTGGAAGTTGGA-----

-----  
-----  
-----  
-----  
-----

-----AATAAA----GGA-----CACCCAAGATGCCTCT--  
TCCTCTAGCAATAGCATTCTACTAAAAGGTGGGGTAG-GGATTCCCACTTCTGAAAGTGCCTGTCCTG---GGTAGC  
GGTAACTAAGGACCCCCCAGGAGAAACCCCTCCTGAACT

>Dog

TTTAACAGGCTCAAGTCCTTTTATACTTTTATTGCCAATATCCTGCCAAGTAGAA---TAACTTTT--CT--TCTTTCC  
ATTTT-----A-----TGTA-----

-----  
-----  
-----  
-----  
-----

-----ATAAA----AGA-----CCATCTGGGACATTCT--  
TTCTCCAGCAATAGTGCTCTCCTAGAAGGTGGGTGAG-GGGATCCAGCTTCTAAAAGTGCCTGTCCTA---GTTGGA  
GGCATGCAGGGATATCCACAGAGAAACCCCTTCCTAACT



>Marmoset

CATGCCTTCTT---TTTCTTATAACATTATTACAGTGTAAATCAGCAATTCTAGCTTGCCTC-AGATAGTAATACAATC  
TTTAAATAGTCTACTTCCACTTATGCTGACTCTGATATGACTCAAAGCAATGTTGTCTGTCTGGAGACACCTTAGAAT  
TGAGCATAACAG---CAACTGAGAGAG---tggatgatgagaaatttcttagtgggtacaacgtatggtattctgggtg  
atggataccctaaaatccctgacttccccacttttgcaatatatgcatgtaacaaaactacacttttaccctccagatt  
tatacaaattaaaa-----aataaaaag---CTATTAATAT---AATTGGTAAACACAAAAATATGTGTGGTTC-AAA  
ACTCATCTTTCTTC-GATATTTTCAACTTTGATAAATGGTTGAAAGTATTGAGCATATTCGATACTTTCAACCATTTA  
TTCTTCTTTCAACCTGATCCTCTTAATACTGAGGGAAATAAAGAAGGTTTCATGCATCGCTTTAATTGAATATTTTCCA  
ATTGTATGCATTATTTTCATAGCTACA

>Tarsier

CATGCTCTTTCTTTTTCTTGTAACATTACTTAAAGTCTAATCAGTAATTCTAGCTTGCCTG-AGATA-----CAATC  
TTTGCATTGTCTGCTTCCACTTATGCTGACTCTGATATGACTCAGTGCAATGTTCTTTGTCTGGAGACACCTTAGAAC  
TGAGCATGAAAG---CAATTGAGGG-----ggtgagaaattacttcatgggacaaatgtatg--gatagggtg  
atggatgccctaaaagc-----ccttaccaccgtgaaatctatacatatgacaatattataacttgtaccctacacatt  
tatataaataaaaaataaaaaaatgaaag---CAAGTGGTAT---AATTGTTAAATACAACAATATGTGCAATTTGAAA  
ATTCATCTTTCTTTTGGG-----GAGCAAAG-----CAACCATTCA  
TTCTTCTTTCAGCCTAATTCTTCTAATATTGGGGAAGATGAGGAAGGTTTCATGCATCCTTTTGTAGAATGTTCTGTA  
AGTCTACGAATTATTTTCATAGGTACC

>Bushbaby

CATGCCCTCTCATTTTTCTGTAGTATTATTATAGTCTAATCAGCCATTCTAGATTGTCCCAGACA-----TGGT-  
TGCACACTGTTTACTTCCATTTACACAGACTCTGACATGACTCAATGCAATGTTCTCTGTCTAGAGACACCTCAGGAC  
TGAGCATAAAAG-----

-----CAAGTGATAT---AATCGATAAACACAACAA-----

>Mouse\_lemur

CACACCCTCTTATTATCCTTGTAACATTATTACAGTCTAATCAGCAATTCTAGCTGGCCCCGAGATA-----TGATC  
TTCACACTGTTTACTTGCACGTACGCTGACTCTGACATGACTCAATGCAATGTTCTCTGTCTGGAGACACCTTAGAAC  
TGAGCATAAAAG-----

-----CCAGTGATAT---AATTGTTAAACACAACAT---CTGTAATTTGAAA

ACTCATCTTTCTTT-GAA-----GAGCATAGCAGATACTTTCAACC-----A  
TTCTTCTTCCATGCTAATTCTTTTAAAGTAGGGAAGATAAAGAAGGTTTCATGCATATCTTTAATAGAATGTTCTCCA  
AGTCTACATATTAA-TTCATAAGTACC

>Horse

CAGGCGCTCTCCTTTTTCTTGTAACATTACTACAGTCTAATCAGCAAGTCCAGCTTGCCCCAAGATA-----CAATC  
TTCACACTGCCTACTTCCACATATGCTGACTCTGATGCGTCTCAATGCAATGCTCTGTGTCTGGAGACACCTTAGAAC  
TGAGTATAACAG-----

-----CAACTGATGG---AATTGTTAAACACAATGACCTGTGTGATTTGAAA

GCTTATCTTTCTTT-GAA-----GAGCATAGCAGATACTTTT-----A  
TTTTTTTTTCAACCTAATTCTTCTTATTGTAGGAGAGATAAAGAAGCTTCATGTATCCCTTTAATAGAATGTTCTCCA  
AGACTATGCATTGTTTTTATAGGTACC

## Marker L39

>L1PB4\_3'-End

```
-----gacatacagagtggaataatagaca
ctggagactcmgaaaggt-----gggaggggtgggaggggg
gtgaggggatgagaaattacctawtgggtacaatg-tacactattcgggtgatggktacactaaaagcccagacttcac
cactacgcaatatatccatgtaacaaaactgcacttgtaccccctaaatctataaaaaataaaaaa-----
-----
```

>Human

```
GCTGGGAAAGCAAGT-GTCTAACAATTTTCTATTTTCAGCCTCCTATCAGAAC-CAAAGGTGATGAGTTCCTCAAAC
CTAGGAAGGGATCCACGTTTTTAAACAGTTAAAAT--ATTAG---AAATTTTAACCAC---atgagggagggaggaga
ttggataatgagaaagtatttaattgggtacagca-tacattatttgggtgatagatgcgctacaagcccagattttgc
cactatgcaataaagccatgtaac-aaattgtgtttgtaacccttaaattatacaaatttaaaga-----aaaca
---AAATGTTTACCAC---GTGGAAGTACTAAATCTCCTGCATAAATTGAGCTCTGTATCCTTCACAGTCGATAAAGC
CTTTGGCATGACGAGAACCACCAAGAAGT
```

>Chimp

```
GCTGGGAAAGCAAGT-GTCTAACAATTTTCTATTTTCAGCCTCCTATCAGAAC-CAAAGGTGATGAGTTCCTCAAAC
CTAGGAAGGGATCCACGTTTTTAAACAGTTAAAAT--ATTAG---AAATTTTAACCAC---atgagggagggaggaga
ttggataatgagaaagtatttaattgggtacagca-tacattatttgggtgatagatgcactacaagcccagattttgc
cactatgcaataaagccatgtaac-aaattgtgtttgtaacccttaaattatacaaatttaaaga-----aaaca
---AAATGTTTACCAC---GTGGAAGTACTAAATCTCCTGCATAAATTGAGCTCTGTATCCTTCACAGTCGATAAAGC
CTTTGGCATGACGAGAACCACCAAGAAGT
```

>Orangutan

```
GGTGGGAAAGCAAGT-GTCTAACAATTTTTTATTTTCAGCCTCCTATCAAAAC-CAAAGGTAATGAGTTCCTCAAAC
CCAGGAAAGGATCCAAGTTTTTAAACAGTTAAAAT--ATTAG---AAATTTTAACCAC---atgagggagggaggaga
tttgataatgagaaagtatttaattgggtacagca-tacattatttgggtgatggatgcactacaagcccagattttgc
cactttgcaatatagccatgtaac-aaattgtgtttctaacccttaaattatacgaatttaaaga-----aaata
---AAATGTTTACCAC---GTGGAAGTACTAAATCTCCTGCATAAATTGAGCTCTGTATGCTTCACAGTCGATAAAGC
CTTTGGCATGACGAGAACCACCAAGAAGT
```

>Baboon

```
GCTGGGGA-----AGCCTCCTATCAAAAC-CAAAGGTGATGAGTTCCTCAAAC
CTAGGAAGGGATCCAAGTTTTTAAACAGTTAAAAT--ATTAG---AAATTTTAACCAC---at----tagggagaaga
ttggataatgagaaagcatttaattgggtacaaca-tacattatttgggtgatggatgcactacaagcccagattttgg
caccatgcaatatagccatgtaacaaaattgtgtttgtaacccttacgttatacaaatttaaata-----aaaca
---AAATGTTTACCAC---ATGGAAGTACTAAATCTCCCGCATAAATTGAACTCTGTATCCTTCACAGTCGATAAAGC
CTTTAGCATCATAAGAACCACCAATAAGT
```

>Rhesus

```
GCTGGGAA-----AGCCTCCTATCAAAAC-CAAAGGTGATGAGTTCCTCAAAC
CTAGGAAGGGATCCAAGTTTTTAAACAGTTAAAAT--ATTAG---AAATTTTAACCAC---at----tagggaggaga
ttggataatgagaaagtatttaattgggtacaaca-tacattatttgggtgatggatgcactacaagcccagattttgg
caccatgcaatatagccatgtaacaaaattgtgtttgtaacccttacgttacacaaatttaaata-----aaaca
---AAAGGTTTACCAC---ATGGAAGTACTAAATCTCCCGCATAAATTGAACTCTATATCCTTCACAGTCGATAAAGC
CTTTAGCATGACAAGAACCACCAATAAGT
```

>Marmoset

```
GCTGGGAAATCAAGT-GTCTAACAATGCTACACTTCAGCCTCCTATCGAAAC-CAAAGGTGATGAGTTCCTCAAAC
CTAGGAAGGGATCCAAGTTTTTAAAGCGTTAAAAT--ATTTG---AAATTTTAACCAC---atgagagaggaaggata
ttggataatgagaaagtatttaattgtgtacaaca-tacgttatttgggtgatggctacactgcaagcttagattttgc
tactatgcaatatatccatttaacaaaattgtgcttgaacccttacattatacaaatctaaaga-----aaata
---AAATGTTTACCCC---ATGGAAGTATTAATCTCCTTTATCAATTGAGCTCTGTATCCTTCACAGTTGATAAAGC
CTTTGGCATGGCAAGAACCACCAAAAAGT
```

>Tarsier

```
GTTGAGAAAGCAGAT-ATCTGACCATTTTCAGATTTTCAGTCTCCATTAAGAC-TACAAAATAATGAATTCTTCAATCT
CCAGGAAGGGATTCA-GTTTCTAAACTATTAATA--AGATCAT---AAATGTATACCAC---at-----
-----gagtgcagtagtacatgattgggggtgacggttataactaaaagcccagactccac
catgacacagtatagccatgtaacaaaattgcacttgtaccccataaatctatacaaatgaaaaataaaaaataa
---AAATGTTTCACTAT---ATGTAAGTACTAAATATCTCCTATAAATGGTGTGTTTTGGCTCCTTCACAGATCATGAGGT
```



```

CTTTGGCATAACTAGAACATCAAGAAAT
>Bushbaby
GCAGGGAAATCAAGTTAGTTGACAATTTTCAGATTCCAGCCTCCCATCAAAAC-TATGCAGTGAAGAATTCCTCAAAC
CTGGGTAGGGTTCAAG-TTCTAAATAGTTAAA--AGTTTGG-----
-----
---AAATTTTTACCCT---GCAGTAGCACTAAGGCCTCTGTATAAGTTGAGTTCTGTGT-CTCTACAGCTGATGAGAA
CTTCAGCATGACCAGAGCCATCTAGAAGT
>Mouse_lemur
GCTGGGAAAGCAAGTCACTTGACAATTTTCAGATTTCAGCCTTCCATCAGGAC-TACAAGGTGATGAATTCCTCAAAC
CTGGGAAGGGTTTCAGG-TTCTAAAT----AGA--AGACTGG-----
-----
---AAATGTTACCAT---GTGGTAGCACTAAATCTTTGGTATAAATTGAGTTCTGTGTCCTTTACAGTTGATGAGGC
CTTTGTC----CTTGAGCCATGAAGAAGT
>Tree_shrew
GCTGGGAAAGCAAG--ATCTGGCAATTTCTAATTTTCAGTCTCCTATCAAGACTTACAAGGTGATGAACGCCTCTATTC
TAGGTAAGGGATACTGG-TAATAATTAGTGAGAATGGCTTGG-----
-----
---A-ATGTTACCAC---ATGGCAGCACTAAATCTCTTCTG-AAATTGAACTCCATATCTCTTAGAGTTGATGAAAA
CTTT-----
>Guinea_pig
-----AAAAATCTAACCTGCAGCTTTCTTCAAGACTTACATGGTGAGGAATCTCGCAGGCC
CTGGGAAGGGAATCTTACTGTAAACAGTTATAGTTGAGTTGG-----
-----
---AAATATTCCCAC---ATGGAAATTCTAAATTTCTGTATAAATTAAGCTCTGGGTCTTTACAATTAACGTGAC
CTTTGTCGGGGATCCAGAATCCAAATTGT
>Horse
GCTGGGAAA-TATGA-ATTTGGCAATTTTCGTATTCCAGCCTCCCATCAAGACTCATAATGTGAGGAATTCCTCCAACC
CCAGGAAGGAGTTTCAGG-TTCTAAATAGTTACAATGGATTGG-----
-----
---AAATGTGCACCAC---GTGGAGGCACTA-ATCTTCTGCGTAAATTGAGTTCTGTATCTTCTAAAGGGGGTATGGA
TTTTGCTACGACAAGAGCCATCAAGAAGT

```

## Marker L41

>L1PB4\_3'-End

```
gacatacagagtgggaataatagacactggagactcmgaaaggtgggaggggtgggagggggggtgagggatgagaaatta  
cctawtgggt-----acaatgtacac  
tattcgggtgatggktacactaaaagcccagacttcaccactacgcaatatatccatgtaacaaaactgcacttgtac  
cccctaaatctataaaaaataaaaaa-----
```

>Human

```
TCACCATGCACCTAGCTTACACCTTGCTCTCTATT-GATAATAATAAAAAGAAAAATTCCTAAGAGAGAACATGATATT  
TGCATTATTATTAGAGCTGTGTAACACACTACCTG---AAAACCTAGTGACTATAGCTAACA---aaaatgtactg  
tactcagatgatggaaaccctaaatgccctaacttgaccactatacattatatacatgtaacaaaatTTTACATATAC  
cccataaatttGTGTAATAACAA---AAAACCTTAGTGATTTAAA---ACAACAGTATTATTATGTGCGCAGTAAGT  
CAGGAATCCTAGCACAGTTTAGCTGGGTCTGTG-CTCTGACTCTCTCACAAAGGCTACAATCAAGGAGCTGGCTAG
```

>Chimp

```
TCACCATGCACCTAGCTTACACCTTGCTCTCTATT-GATAATAATAAAAAGAAAAATTCCTAAGAGAGAACATGATATT  
TGCATTATTATTAGAGCTGTGTAACACACTACCTG---AAAACCTAGTGACTATAGCTAACA---aaaatgtactg  
tactcagatgatggaaaccctaaatgccctaacttgaccactatacgttatatacatgtaacaaaatTTTACATATAC  
cccataaatttGTGTAATAACAA---AAAACCTTAGTGATTTAAA---ACAACAGTATTATTATGTGCGCAGTAAGT  
CAGGAATCCTAGCACAGTTTAGCTGGGTCTGTG-CTCTGACTCTCTCACAAAGGCTACAATCTAGGAGCTGGCTAG
```

>Orangutan

```
TCACCATGCACCTAGCTTACACCTTGCTCTCTATT-GATAATAATAAAAAGAAAAATTCCTAAGAGAGAACATGATATT  
TGCATTATTATTAGAGCTGTATAACACATTACCTG---AAAACCTAGTGACTATAGCTAACA---aaaatgtactg  
tactcagatgacggaaaccctaaatgccctaacttgaccactatacattatatacatgtaacaaaatTTTACATATAC  
cccataaatttGAGTAATAACAA---AAAAC--AGTGATTTAAA---ACAACAGTATTATTATGTGCGCAGTAAGT  
CAGGAATCCTGGCACAGTTTAGCTGGGTCTGTG-CTCTGACTCTCTTACAAGGCTACAATCAAGGAGCTGGCTAG
```

>Baboon

```
TCACCATGCACCTAGCTTACAACCTTGCTCTCTATT-GACAATAATAAAAAGAAAAATTCCTAAGAGAGAACATGATATC  
TGTATTTATTATTAGAGCTGTATAACACATTATCTG---AAAACCTAGTGACTATAGCTAACA---aaaatgtattg  
tactcagatgatggaaaccctaaatgctctaacttgatcactagacattatatacatgtaacaaaatTTTACATATAC  
cctataaatttGTGTAAGTAACAA---AAAACCTTAATGGTTTAAA---ACAACAGTATTATTATGTGCGCAGTAAGT  
CAGGAATCCTAGCAAAGTTTAGCTGGGTCTGTG-CCCTGACTCTCTCACAAAGGCTACAATCAAGGAGCTGGCTAG
```

>Rhesus

```
TCACCATGCACCTAGCTTACAACCTTGCTCTCTATT-GAAAATAATAAAAAGAAAAATTCCTAAGAGAGAACATGATATC  
TGTATTTATTATTAGAGCTGTATAACACATTATCTG---AAAACCTAGTGACTATAGCTAACA---aaaatgtattg  
tactcagatgatggaaaccctaaatgctctaacttgatcactagacattatatacatgtaacaaaatTTTACATATAC  
cctataaatttGTGTAAGTAACAA---AAATCTTAATGGTTTAAA---ACAACAGTATTATTATGTGCGCAGTAAGT  
CAGGAATCCTAGCAAAGTTTAGCTGGGTCTGTG-CCCTGACTCTCTCACAAAGGCTACAATCAAGGAGTTGGCTAG
```

>Marmoset

```
TCACCATGCACCTAGTTTATACCTTGTTCTCTATT-GATAGTAATAAAAAGAAAAATTCCTAAGAGAGAATATGATATC  
TGCATTATTATTAGAGCTCGTGAACACATTACCTC---AAA-----ACTATAGCTAACA---aaatgtattg  
tattcagacaatggaaaccctaaatgccctaacttgaccacaatacaatatatatatagcaaaaactTTTACATATAC  
tccataaatttGTGTAATAACAA---AAAACCTTAGTGTTTAAA---ACAACAATTTTATTATGCCACAGAAAGT  
CAGGAATCCTAGCACAGTTTAGCTGGGTCTTGT-CTCTGATTATCTCACAAAGGCTACAGTCAAGGAGCTGGCTAT
```

>Tarsier

```
-----ACCTGGTTTACACATTGTTCTTTATTAATAACAATCAAAGATAAATTTATAAAAAGAGA--TTTATGTC  
TGTTTCAGTAATTTATAGCTGCATAACATATTACCTC---AAAATTTGGTGGCTATAGTTAACA---aaaatgattg  
cactcaggtgtagacttcctaaattccctgacctactcaccagcactatatacaggtaacaaaatTTTACAGGTAT  
ctcacaatTTTGTACAAAC-aca-----AAA---AGTGACAAAAA---ACAACAGTATTTACTATATCACAGTAAGC  
CAGGAATCCAAGCACAGTTTAGCTGGGTCTTGTG-CTCTGATTATCTCACAAAGGCTACAATTAAGGAGCTGACTGG
```

>Bushbaby

```
---CTATGCCCTGACCTGCATCCTGTTTTTTTATT-GCTAATAATTACAGATAAATCTC-AATGGAGG-CGTGATGCC  
TATATTAGCTGTTTAGAGCTGCCTAACACATCACCTC-----  
-----AAAACCTTAGTGTTCTCAA---ATAACAATGTTTACTTTCACTGCAAGT  
CAGGAATCCAAGCACTCTTTGGCAGCGTCTCTGTCTCTGGGTCTCACATAAGGCTGCAATCAAGGAGCTGGCTAT
```

```

>Mouse_lemur
TCACCATGTACCTGACTTGCATCCTGTTTTCTATT-GATAATAATCAAAGATAAATCTCTAATGGAGGACATGATGCC
TATATTAGTTATTTATAGCTGCATAAGACATCACTTC-----
-----
-----AAACTTAGTGGATTAAA--A--CAATATTCATTATGTCACGGTAAGT
CAGGAATCCAAGCACAGGTTAGCTGGATCCTCTGTCTCTGAGTCTCTCACAAGGCTATAATCAGGGAGTTGGCTAG
>Tree_shrew
TCACCATACACCTGCCTTACACCTTGTCTTCTATT-GACAGTAATCAAAGATGACTCACTAAGAGAGAATGTGATTTTC
TGTATTAGTTATCTATTGCTGCATAATGCCTTACCTC-----
-----
-----AAAATTTATTGGCTTGAA--ACAGCAATATTCATTATGTCACAGCAGGT
CAGGAATCTGAGCACGAGTTACCTGGGTGCTGTGGCTCAGGTTCCCTCACAAGCCTGTCATCAGGGAGCTGATCAG
>Guinea_pig
TCATTACACACCTAGCTTATACCCAGTTTTTAAA-GATAATAATCATGGATATATTTATAAGAAAGAACCTGATGTT
TTGATTAGTTA--TACAGCTACAAGACACATTACTTT-----
-----
-----GAAGACTAGTGAAGTAAA--ATGACAATACTCATTATGTTACAGTGAGT
CTGAAATTTGAGCACAGCATACTTGG-TGCTCTGGCTC-GGTGTTGCTCCTAGGCTGCAGTTGAGGAGCTGATCAG
>Dog
TCACCACCCACTTGGTTTTGTACCTTATTCTCTATT-GATAGCAATCAAAGATTAATCCCTAACACAGAACATGATGTC
TGTATCAGTTATCTATAGCTGCATAACGCATTACTTC-----
-----
-----AAACCTTAGTAGCTTAAA--ACAGTAATGTTTATTATGTCACAGCCTGT
CTGGAATCCAAGCACAGGTTAGCTGGGTCTCTGACTCT-GGTCTCTCACAAGGCTGCAGTCAAGGAGTTGCCTAG
>Horse
TCACCATGCACCTGGCTTACATCTTGTCTCTATT-GATAGCAATTAAGATAAATCCCACAACAGACCGTGATGTC
TGTATTAGTTA-----TGCATAACACATCACTTC-----
-----
-----AAACTTAGTGGCTTAAA--ATAACAATACTCGTTATGACACAGCATGT
CAGGAATCCAAGCACAGCTTAGCTGGGTCTCTGGCTCTGGGTCTCTCACAAGTTGCAATCAAGGAGCTGGCTAG

```

## Marker L43

>L1PB4\_3'-End

```
-----tcatgtcttttgcagcaacatggatggaactggaggccattatcc
t-----aagtgaataaactcagaaacagaaagtcaaataccgcatgttctc
acttataagtggg---agctaaacaatgkgtacacatggacatacagagtggaataatagacactggagactcmgaaa
gggaggagg---tgggagggggggtgagggatgagaaattacctawtgggtacaatgtacactattcgggtgatggkta
cactaaaagcccagacttcaccactacgcaatatatccatgtaacaaaactgcacttgtaccccct--aaatctataa
aaataaaaaaa-----
```

>Human

```
ACAAA--CATAAGTCTTCTCTT-TCTCAAATTAATATGACTCTAATTTTAGATGTAGGTGAAGAAAGGAGAAAGAA
GCAAGT--CATTAA---AAAGCAAGTATTA----agtgaacaaggcaggtacagaaagacaaatatcacatgttctc
actcataagtggg---tgctaaaaaatgtgttcacatggacatagagaatggaatgatagataatggacactc--aaa
ggggtgagaaagtggaaagaggggaaaatgataagaaattathtaattgggtataatgtatgttattcaggtgatggata
ccctgaaagctcttacttggcaaatatgcagcctatgtatgcaataaaaattgcacatgtatccc--ataaatgtatac
aaata-----AACATAAAAA---TTATTTTTTT---AATTACATAAATTCATTTT--TGGACATATTCTGTAATATC
TCCATATTTACTTTCAAATTCTCACCC--TTATACACCCATAGCAGGAATGATACACACAAAATTTAATTATGCTACTCC
TCTGTTTAGAATCTTTCAAAG-GGTTTT-AT-CTTATCTTAGGATAATATCT
```

>Chimp

```
ACAAA--CATAAGTCTTCTCTT-TCTCAAATTAATATGACTCTAATTTTAGATGTAGGTGAAGAAAGGAGAAAGAA
GCAAGT--CATTAA---AAAGCAAGTATTA----agtgaacaaggcaggtacagaaagacaaatatcacatgttctc
actcataagtggg---tgctaaaaaatgtgttcacatggacatagagaatggaatgatagataatggacactc--aaa
ggggtgagaaagtggaaagaggggaaaatgataagaaattathtaattgggtataatgtatgttattcaggtgatggata
ccctgaaagctcttacttggcaaatatgcagcctatgtatgcaataaaaattgcacacgtatccc--ataaatgtacac
aaat-----AACATAAAAT---TATTTTTTTT---AATTACATAAATTCATTTT--TGGACATATTCTGTAATATC
TCCATATTTACTTTCAAATTCTCACCC--TTATACACCCATAGCAGGAATGATACACACAAAATTTAATTATGCTACTCC
TCTGTTTAGAATCTTTCAAAG-GGTTTT-AT-CTTATCTTAGGATAATATCT
```

>Orangutan

```
AAAAA--CATAAGTCTTCTCCT-TCTTAAATTAATATGACTCTAATTTTAGATGTAGGTGAAGAAAAGGAGAAAGAA
GCAAAT--CATTAA---AAAGCAAGTATTA----agtgaaccaaacagggtacagaaagacaaatatcacatattctc
actcataagtggg---tgctaaaaaatgtgttcacatggacatagagaatggaatgatagataatggacactc--aaa
ggggtgaaaaagtggaaagaggggaaaatgataagaaattathtaattgggtataatgtatgttattcaggtggtggata
ccctgaaagcccttacttggcaactatgcagcctatgcatgcaacaaaattgcacgtgtatccc--ataaatgtatac
aaat-----AACATAAAAA---TTATTTTTTT---TAAATTACATAAATTCATTTT--TGGACATATTCTGTAATATC
TCCATATTTACTTTCAAATTCTCACCC--TTATACACCCATAGCGGAATGATACACACAAAATTTAATTATGCTACTCC
TCTGTTTGAATCTTTCAAAG-GGTTTT-AT-CTTATCCTAAGTTAATATCT
```

>Baboon

```
ACAAA--CATAAGTCTTCTCTT-TCTTAAATTAATATGATACTCTAATTTTAGATGTAGGTGAATAAAGGAGAAAGAA
GCAAGT--CATTAA---AAAGCGAGTATTA----agtgaacaagccaagtagacagaaagacaaatatcacatattctc
actcataagtggg---tgctaaaaacttttttcacgtggacgtagagaatggaatgatagataatggacactc--aaa
ggggt---aagtggaaagaggggaaaatgacaagaaatcatttaattgggtataatgtatgttattcaggtgatggata
ccctgaaagcccttacttggcaactatgcagccgatgcatgcaacaaaattgcacatgtatccc--ataaatgtatac
aaataaata----AAAGTAAAAA---ATTTTTTT---AATTACATAAATTCATTTT--TTGACATATTCTGTAATATC
TCCATATTTACTTTCAAATTCTTACCC--TTATACACCCATAGCAGGAATGATACACACAAAATTTAATTATGCTACTCC
TCTGTTTGAATCTTTCAAAG-GGTTTT-AT-CTTATCTTAGGATAATGTCT
```

>Rhesus

```
ACAAA--CATAAGTCTTCTCTT-TCTTAAATTAATATGATACTCTAATTTTACACGTAGGTGAATAAAGGAGAAAGAA
ACAAGT--CATTAA---AAAGTGAGTATTA----agtgaacaagccaagtagacagaaagacaaatatcacatattctc
actcataagtggg---tgctaaaaactgttttcacatggacgtagagaatggaatgatagataatggacactc--aaa
ggggt---aagtggaaagaggggaaaatgatgagaaatcatttaattgggtataatgtatgttattcaggtgatggata
ccctgaaagcccttacttggcaactatgcagccgatgcatgcaacaaaattgcacatgtatccc--ataaatgtatac
aaataaata----AAAGTAAAAA---TTATTTTTTT---AATTACATAAATTCATTTT--TTGACATATTCTGTAATATC
TCCATATTTACTTTCAAATTCTTACCC--TTATATACCCATAGCAGGAATGATACACACAAAATTTAATTATGCTACTCC
TCTGTTTGAATCTTTCAAAG-GGTTTT-AT-CTTATCTTAGGATAATGTCT
```

>Marmoset

ACAAA--CGTAAGTCTTCTCTT-TCTTAAATCAATATGGCACTTAAATTTTAGATGGAGGTCAAGAAAAAAGAAAGAA  
GCAAGT--CTTTAA---AAAGCAAGTATTA----agtgaaataagccaggtacggaagacaaatcacatattctc  
acccataagtggg---taccaaaaaatgtgtccacacagacgtagagaatggaatgatagataatggagactc--aaa  
ggggtgagaaagtgggaagagaggaaattatgagaaattagttaatgggttgtaatgatggattcaggtgatggata  
cctggaaagccctgacttggcaactgtgcagcctatgcatgcaacaaaattgcatgtgtatccccataaatgtatac  
aaataaata---CTAGTAAAAA---TTATTTTT-GAAAATTATGTAATTCATTTTTCTTGGGCATATTCTCTAATGTG  
TCCATATTTATTTTCAAATTCTCACCC-TTATACAGCCAAAGCAGGAATGATACACGCAAATTTAATTCTGCCACTCC  
TTTGTTTGAAATCTGTCTAAG-GGTTTT-AT-TTTATCTTAGGATAATGTCT

>Tarsier

ACAAA-GTAAAAGTCTTCTTTTTCTCTTAAATTAATG----ACATTAATTATAGACTAAGGTGAAGAAAT---AAGAA  
GCAAGT--CATTAA---AAGACAAGTATTA----atggaaacaagtttagtcacagaaagacaaatcacatgggtctc  
attcaaaagtgggtgggtgctaaaaaaa-attcacattgatgtgcagagtggaatggtagataatggagatt--aaga  
aggttaaggggatgg-aaggggaaaaatgatgagaaattaattaccaaatacaatgtatgttactcaggtgatagata  
tcctaaaacccttgacttgaccactatgcaacctatgcaagtaacaaaatcgcacatgtacctc--ataaatgtatac  
aaattga-----AAAGTAAGAT---TCATTTTT-AAAATTACATAATTTACTGTCTTGAGTATGTGCTGCAACATG  
CCCATATTTATTTCTCAAATTCTCACCC-C-GTACATCCACAGCAGAAATGATG-ACATGAATTTAATCATGCCACTTC  
TCTGCTTAAAATCTTTCAAAT-AATTTT-GT-CTTATTTTAGGATAATGTCT

>Bushbaby

ACAAA-GAATAAGTCTTCTCTT-TCTTAAATTAATATGACACTCTAATTTTAGATTGAGATGAAGAAAGGGTACAGAA  
ACAAGT--CAGTAA--AGGGTAAGTAGAA-----  
-----  
-----  
-----ATCATTTTTTAAACTAAGTCATTGATTTTCTTGGGTATGTTCTGTAATATG  
TCCACATTTACTGCTAAATTCTCACTG-TCGTACACCCACAGCAGGAATGATAAACACAAATTTAACTCTTTAACCC  
TCTGTTTTAAAGTATTTTACAG-GATTTT-AC-CTT-TCTTAGTGTAATATCT

>Mouse\_lemur

ACAAA-GAATAAGTCTTCTCTT-CCTCAAATTAATATGACACCCTAATTTTAGATTGAGGTGAAGAAAGTGGAAAGGA  
ATAAGT--CACTAA--AGAACAAGTAGAA-----  
-----  
-----  
-----ATC-AAATTTTAAATTATGTAATTGATTTTCTTGGATATGTTCTGTGCTATG  
TGCATATTTACTCTCAAATCCTCACCA-TCGTACACCCACAGCAGGAATCGGAAACCCAAAGTTAACACACCACACC  
TCTGTTTTAAATCTCTCAGAC-GATTTT-AT-CTT-TCTAGGGATAATGTCT

>Tree\_shrew

-----AGTCTTCACTT-TCTTAAATTAATACGACATTC-AGTTTCAGATTGATGTGAAGAGAGGGGAAAGAA  
GTAAGTCACACAAA--AAAATAGGTAGAT-----  
-----  
-----  
-----ATCAGGTTTTT-AATTATGTCATTGATTTCTTTGGGTATATTCTGAAATATA  
TTTGTATTTACACTCAAATCCTCCCC---ATCTGCTCACAGAAGAAATGATAAGCAGAAATTTAATCAGACCACTCC  
TCTGTTTTAAATCTTTCAAAG-GACTTC-AT-AGTATCTTAGGATAATGTGT

>Dog

ACAAAAGAACAAGTTTTCTCTT-TCTTAAATTAATA--GCACTCTAGTTTTAAAGTGCTAGTAAAGAAAGGATGAAGAA  
GCAAAT--CATTAA--AAAA-AAGTAGAA-----  
-----  
-----  
-----ATCATTTTT--AAATTCAGTAATCAACATTGTTGGGTACTCTGTGGTATG  
TCCATATGTCAT-TCAAATCCTTGCC- TTGTGTACTCCAGCAGAAACCACAAAGACCAACATATTCTGGTCACCCCT  
TCTATTTAAAATCTTTCAAAGTGTTTTTAAT-CTCATTTTAAAGATAATGTCT

## Marker L70

>L1PB4\_3'-End

```
-----  
-----  
-----gggagctaacaatgkgtac  
acatg-----gacatac--aga--gtgg-----  
--aataatagacactgggagactcmgaaaggtgggaggggtgggaggggggtgagggatgagaaattacctawtgggtac  
aatgtacactattcgggtgatggktacactaaaagcccagacttcaccacta---cgcaatatatccatgtaacaaaa  
ctgcacttgtaccccctaaatctataaa----aataaaaaaa-----  
-----
```

>Human

```
TTTTTCTAGGCTTGGG-TGC-ATTGATTATTC-----TTTGTTTAAAATATGATGACACAGTAAATATTCCTCTTTT  
GCGCTGTGTTACC-AATTTTTGATGTACCAGTGTTCCTGTAGT---CTTATTTACATAAAGGCTCTTTTAAATACAT  
A--CCATTCTTAATTTAAATATAACTACT-AAAA-----TTGTATATCTCTACTGCAAATGGAGATACCATGTTAC  
TTGCAATAGATAGGAG----AAA-ACCATTAAA----atggaaac--agagtgtgg-----  
--aatgatagacaatgggagacctggaaggttgcaggggtgggaagggagtgaggagataagaaatcacttactgggtac  
aatgtacgttattcaggtgatggatgcag-aaaaaccctgtcttcgccactatacagtaatatatgcatgtagcaaaa  
taacacctggactcca-aaatttatacc----AAAAGCCCCCAG-----AAAAGCATAACTACTACAAAAA---TCTA  
CCTGTGCTC-----CACCCA-----AAATCATCTTGCACATCAACACTTATGCATCTG-CTACCTTTTGCAAAGC-  
ACTACTCAATTTTACCATTTATTAATTATCAAAAAGACAG-ACT-TTTAAGAGAGAGATTTTCTGTGGTATATTTATA  
GATCATTGTACAATCATAGCTTATAAAAAG-ACATACATTGGTAAGA--GTTTGAACAGA-TCTTTGGATACTC
```

>Chimp

```
TTTTTCTAGGCTTGGG-TGC-ATTGATTATTC-----TTTGTTTAAAATATGATGACACAGTAAATATTCCTCTTTT  
GCACTGTGTTACC-AATTTTTGATGTACCAGTGTTCCTGTAGT---CTTATTTACATAAAGGCTCTTTTAAATACAT  
A--CCATTCTTAATTTAAATATAACTACT-AAAA-----TTGTATATCTCTACTGAAAATGGAGATACTATGTTAC  
TTGCAATAGATAGGAG----AAA-ACCATTAAA----atggaaac--agagtgtgg-----  
--aatgatatacaatgggagacttgggaaggttgcaggggtgggaagggagtgaggagataagaaatcacttactgggtac  
aatgtacgttattcaggtgatggatgcag-aaaaaccctgtcttcgccactatacagtaatatatgcatgtaacaaaa  
taacacctggactcca-aaatttatacc----AAAAGCCCCCAG-----AAAAGCATAACTACTACAAAAA---TCTA  
CCTGTGCTC-----CACCCA-----AAATCATCTTGCACATCAACACTTATGCATCTG-CTACCTTTTGCAAAGC-  
ACTACTCAATTTTACCATTTATTAATTATCAAAAAGACAC-ACT-TTTAAGAGAGAGATTTTCTGTGGTATATTTATA  
GATCATTGTACAATCATAGCTTATAAAAAG-ACATAAATTGGTAAGA--GTTTGAACAGA-TCTTTGGATACTC
```

>Orangutan

```
TTTTTCTAGGCTTGGG-TGC-ATTGATTATTC-----TTTGTTTAAAATATGATGACACAGTAAATATTCCTCTTTT  
GCACTGTGTTACC-AATTTTTGCTGTACCAATGTTTCCTGTAGT---CTTATTTACATAAAGGCTCTTTTAAATACAT  
A--CCATTCTTAATTTAAATATAACTACT-AAAA-----TTGTATATCTCTACTGAAAATGGAGATACCATGTTAC  
TTGCAACAGATAGGAG----AAA-ACCCTAAA----atggaaac--agagtgtgg-----  
--aatgatagacaatgggagacttgggaaggttgcaggggtgggaagggagtgaggagataagaaatcacttagtgggtac  
aatgtacgttattcaggtgatggatgcac-aaaaaccctgacttcgccactatacagtaatatatgcatgtaacaaaa  
taacacctggattcca-aaatttatacc----AAAAGCCTTCAC-----AAAAGCATAACTACTACAAAAA---TCTA  
CCTGTGCTC-----CACCCA-----AAATCATCTTGCACATCAACACTTACGCACCTG-CTACC--TTGCAAAGC-  
ACTACTCAATTTTACCATTATTAATTATCAAAAAGCAG-ACT-TTTAAGAGAGATTTTCTGTGGTATATTTATA  
GATCATTGTACAATCATAGCTTATAAAAAG-ACATAAATTGGTAAGA--GTTTGAACAGA-TCTGTGGATACTC
```

>Baboon

```
TTTTTCCAGGCTTGGG-TGC-ATTGATTATTC-----CTTTTTAAAATGTGATGACACAGTAAATATTCCTCTTTT  
GCACTGTGTTACCTAATTTTTGCTGTACCAATGTTTCCTGTAGT---CTTATTTACATAAATGCTCCTTTTAAATACAT  
A--CTATTCTTAATTTAAATGTAATACTACTAAAAA-----TTGCATATCTCTACTGAAAATGGAGATACCATATTAC  
TTGCAATAGATAGGAG----AAA-ACCATTAAA----atgaaaac--agaatgtgg-----  
--aatgatagacaatgggagacttgggaaggttgcaggggtgggaagggagagagataagaaatcacttagtgggtac  
aatgtacattattcaggtgatagatgcac-aaaaatcctgtcttcgccactatacagtaatatatgcatgtaacaaaa  
taacacctggactcca-aaatttatacc----AAAAACCCTCAC-----AAAA-CATAACTACTACAAAAA---TCTA  
CCTGTGCTC-----CACCCA-----AAATCATCTTGCACATCAACATTTATACACATG-CTACCTTTTGTAAAGC-  
ACTGCTCAATTTTATCATTATTAATTATCAAAAAGCAG-ACT-TTTAGGAGAGATAGTTTCTGTTGTATATTTATA  
GATCATTGCACAGTCATAGCTTATAAAAAT-ACGTAAATTGGTAAGA--GTTTGAACAGA-TCTTTGGATACTC
```

>Rhesus

TTTTTCCAGGCTTGGG-TGC-ATTGATTATTC-----CTTTTTAAAAATGTGATGACACAGTAAATATTCCCCTTTT  
GCACTGTGTTACC-AATTTTTGCTGTACCAATGTTCTGTAGT----CTTATTTACATAAATGCTCCTTTTAATACAT  
A--CTATTCTTAATTTAAATGTAACACTACTAAAAA-----TTGCATATCTCTACTGTAAATGGAGATACCATATTAC  
TTGCAATAGATAGGAG----AAA-ACCATTAAA----atgaaaac--agaatgtgg-----  
--aatgatagacaatggagacttggaaggttgcaggggtgggaaggggagaaggagataagaaatcacttagtgggtac  
aatgtacattattcaggtgatagatgcac-aaaaatcctgtcttcgccactatacagtaatatatgcatgtaacaaaa  
taacacctggactcca-aaatttatacc----AAAAGCCCTCAC-----AAAAGCATAACTACTACAAAAA---TCTA  
CCTGTGCTC-----CACCCA-----AAATCATCTTGCACATCAACATTTTATACACATG-CTACCTTTTGTAAAGC-  
ATTGCTCAATTTTATCATTATTATAAATTATCAAAAGGCAG-ACT-TTTAGGAGAGATAGTTTCTGTTGTATATTTATA  
GATCATTGCACAGTCATAGCTTATAAAAAAT-ACGTAAATTGGTAAGA--GTTTGAACAGA-TCTTTGGATACTC

>Marmoset

TTTTTCCAGGACTTGG-TGC-CTTGATTATTCCTCTTTTTTTTTTTTAAATACCATGTCACACTAAATATTCCTCTTTT  
GCACCGTGTTC--AATTTTTGCTGTATGAATGTCCCTTTTGTGTAGCTTATTTATACAAAAGCTTTCTTTAATACAG  
A--ACATTCTTAATTTAAATGAAACGACTGAAAT-----TTGTATATCTCTACTGTAAATGGAGATACTATATTAT  
TTGCAATAGATAAGAG----AAAAACCATTAAA----atgaaaac--cgattttaattgaaaattaaatcacattcc  
ataatgatagacaatggagacttggaaggttgcaggtgcggtgggaagggagtggaagataagaaatcacttagtgggtac  
aatgtacattgttcaggtgatggatgcactaaaaactttgacttcgccaccatacactaatatatgcatataacaaaa  
tagcacttatactcca-agatttatacc----AAAAGCCCTCAC-----AAAGGCATAGCTACTACAAAAA---TGTA  
CCTGTGCTC-----CACCCA-----AAATCATCTTGCACATCAACAGTTTATACACATG-CTAGCTTTTGTCAAAGC-  
ACTGCTCAGTTTTACCATTTATTAATTTTTTAAAAGGCAG-AAT-TTTAAGAGAGATATTTTCTGGGTTATATTTGTA  
GATCATTGTACAATTATAGCTCATAAAAAG-ACATAATTGGTAAGA--GTTTGAACAGA-TCTTTGGATACGC

>Tarsier

TCTTCCCAGACTCCAG-CACAATTGATTATTC-----TCTTC-----ATACCATGACACAGTATATATTCCTCTTTT  
ACAATATTTCCC-AA-TTTTGTGCTGCCCAATGTTCTTTACT----CTTATTTACTCAGTAACTTTCTTTAACATAT  
A-CCCATTTTTAATTTAAATAAGACTACT-AATA-----TTTTGTGTCTCTACCATAACTGGAGATATAATGTTAC  
TTGCAATAGATAAGAG----AAA-ATCATTAAAG----ataaaaacatagaatgtgg-----  
--agtgacagacaacagatacacttagaagggta-aagggcaggatggg-gtggatgataagaaattctttaatgggtac  
aatgtacattatttgagtgatgaatacac-taaagccctgacttcaccattgtgcagtaataacacatgt-----  
----acatgtatcccatacatttatgcc----AAAATAATCCAC-----AAAAACATAACTACTACAAAAA---TCTA  
ACTATGGTC-----CATACA-----AAATCATCTTATATATCAACAGTGGTACATATT-TTACCTTTTGTCAAAC-  
ATTGCTCAATTGTACTGTTACTCAAATTATCAAAATGCAG-AC---TTAAGAGAGATATTTTCTGAAAGCTCTTTATA  
GAACATTGAATAATCACAGCCTATAAAAAT-ACATACATTTGTAAAAGGTTTAAAGCAA-TCTTCAAATAATC

>Bushbaby

-CTTTTCAGGATCAAG-CACAGTTGATTATTC-----CTTTCTTT--ATACCATAACAGAGGACATATTCCTCTTGT  
GCACTGTGTTCCC-AGTTTTGACTGTACCAATGTT-CTGCAGT----CTTATTTACTTAAAAGCTTTCTTTAATATAC  
A-CACATTCTTAATTTAAATAAAACTATT-AAACAT-----TTTTACATTTCTACTGTCAATGCAGATACAATGTTAC  
TCACAATAGATGCATG-----  
-----

-----CAAACCCACAAA-----AATAAAAAACATTGCTACAAACA---TCTA  
ACCATGCTC-----CATCCA-----AAATCACCTGCGCCCAACAATGATGAACACA-CTACCCTTTGTCAAAGCA  
AGTGTTCAATGGTACCGTTTGTCAAATTATCAAAAGGCAG-AATTTTAAAGAGAGAGATTATCTGGAGAATATTTCTA  
GGCCATTGCACAAATATAGCTCACAAAATG-GCATCAATTTGTAAAAGGATTTAAACAAA-TCTTTGGATAATC

>Mouse\_lemur

TCTTTTCGGGCTCAAG-CACAGTTGATTATTC-----CTTTCTTT--ACACCATGACATAGGATATATTCCTCTTTT  
GCACTGTGTTCCC-AATTTTTTCTGTACCAATATTCTGTAGT----TGTATTTACTTAGTAGCTTTCTTTAATATAT  
A-TTCATTCTTAATTTAAATAAAACTACT-AAAATT-----TTTTACATCTCTACTGTAAATGGAGATACAATGTTAC  
TTGCAATAGATCTGTG-----  
-----  
-----AAAACCATAAAA-----ATAAAAACA-TTACTATAAATA---TAT-  
---TTGCTC-----CATCCA-----AAATCATCTGACA---TAACCATGATGCACATG-CTACCTTTTGTCAAAC-  
ATTGCTCAATTATAACATTTGTCAAATTAACACAAGGTAG-ACT-TTATAGAGAGAGATTTTCTGGAGAATATTTTACA  
GGCCATTGTATGATCATAGCTCATAAATAG-ACATAAAACTGTAAAAGGTTTAAACAAA-TCTTTGGATAATC

>Mouse

TCTTTCTAGATTCAAATAACAGTCACTTATTC-----TTTCATT---AGAAAATCATAGAGTATATACTTTTC-TTT  
ACATTATTTTCT-AATGTTTGTATAGCAA-ACTAAATATAT----CTTGTTTTCTTAATAACATTCACAAACATAT  
AGATGATTATTAACCTAAATAATACTGCT-TTAAAAAGAACATTTGTATTTCTGCACTAAATGGAAACTCAGTGTGAC  
TTGCATTAGATATGAG-----  
-----  
-----

-----AAACCCATCAAA-----ATAAAAAAATAAATTGCTACAA---AAA-  
TCTGTCTGCACCCAACATTTTTTAACATCATCTTGCATAACAACACTGGCATATTGG-TG---CTCTTACAAT-ACC  
ACCCACATGCACTGTTGATTGCATCATT-GAAAATCC-AAG---TTACAGAGAG--AAGTTCTGGCAAATATTTCCA  
GGGCATTATATAAAT-----TATGGAAGG--GTAAATTTGTGAAA--GATTGGATATG-TCTTTTGGT-ACC

>Guinea\_pig

T-CTTTTCAGGCTCAAA-CACAATTGATTATTC-----TTTCCTTC--ACATAATCATGCAGTGTATATTCT---TTT  
ACACTATTATCCC-CTTTTTGCAGTGTGGATTC-ACCTGTGAT---CTTG---TTGAATAGCTTTTCATTAACATGC  
A-ACCATTCTTAACCTATATAAAGCCACT-GTAAACAGCA-----CTGTACT-----TTAC  
TTGCAATAGATATGAA-----  
-----  
-----

-----AAAACCCATAA-----AAATAAAAAACATCTCTATAGAA--ATCT  
AACTGTGCC-----CTTCCT-----AGTATTG--TGCACAGAACTCACGATATGTATGCTG----CTTTTGGAAAT-  
TCTGCCCACTCGTACTATTTATTAATTAT--GTTG-TGG---TTAAAGAGAG--ATTTGTGGAGAATATTTTACA  
GGTCACTGTACAACCATCCC-TGCAAAAGT---TAAATTTGTAAAT--GTGATTATCACACCTTTAGATGATC

>Dog

TCATTTCAAGGCTCAAG-CACAATTGATTATTC-----CTTTCTTT--ATGCCTCCATACACTGTATATTCCTCTTTT  
GTATTGTTTTCCC-AATTTTTGCTGTAACAGTGTATCTGTAGT---CTTACTTACTTAATAGCTTTCTTTTACATAT  
A-TCCATT-TTAACTTAAATAGAACTATC-CAAAAAGGAAATGTTCTATTTCTGCTATTTCATGGACATGCAGTGTAT  
TTGCAGTAGATATGAG-----  
-----  
-----

-----AAAAACATAAAA-----ATAAAAAATATAACTATTACAAAAATCTA  
TCAATTGCC-----CATGTA-----AAATCATCTCACACATCAGTGGCAATACACATG-CTACCTTTTGGAGCAT-  
GCTGCTCAATTGTACCACTTATCAAATTATCCA-----AAGATTTATA  
GGCCTTAGTATGATGATGGCTTATAAAAAAGATAGAAATT--TAAGAGGGTTTAAACAAA-TCTTTAAATAATC

>Horse

TCATTCCAAGCTGAAG-CACGGTTGATTATTC-----CTTTCTTT--ATACCATCATAGAGTGTATATTCCTCTTTT  
GCACTGTTTTCCC-AA-ATTTGCTGTAATTGTGTACCTGTAGT---CTTGTTAACTTAATAGCTTTCTCTAATGTAT  
A-TCCATTCTTAATTCAAACAAAATATT-CAAAAAGGAAACGTTATGTCTCTAGTGTAAATGGAGATGCAGTGTAC  
TTGCAATAGATATGAG-----  
-----  
-----

-----AAAACACAGAA-----ATAAAAAACAATCTCTAGAAAA--ATCA  
AACAATGCC-----CAGGTA-----AAATCATCTTGCATATCAATGTGAG---ACATG-CTACCTTTTGGAAAGC-  
TCTGCTCAACTGTACCGCTTACCAAATTATCCAAATGTAG-GCTTTTAAAGAGAGA--TTTTCTGGAGAAGATTTACA  
GACCATCATACAATCCCAGCTTATAAAAAAGATATATATTTGTAAAAAGGGCTAAACAAA-TCTTTAAATAATC



## Marker L77

>L1PB4\_3'-End

-----ctggagactcmgaaaggtgggaggggtgggaggggggtgagggatgagaaattacctawtggg  
tacia-----tgtacac-----tattcggggtg  
atggktacactaaaagcccagacttcaccactacgcaatatatccatgtaacaaaactgcacttgtaccccctaaatc  
tataaaaataaaaaa-----  
-----

>Human

GGATGAAATATTCCAGGCACCAAGAA-GGTGCTT-ATACCAAAGCTATCGGTCTCCCCCTCTCAGTAACTCCAAGAT  
CCCAAACAGCTATACTTGCT----AAATGTGTGTAA----tgtacactattgtgtacccaaaaaccactatttgggta  
gtggttacaataaaaaatccagacttcaccactgtgtagtatatccttgtagcaaaaactgcacttgtgccacttaaatt  
tatataaataaatag--ata-----AAT-AAATATATTCTGAA----TACCATAACACTTA--TCTGTATCATAG  
CCTTCTCATCATATTCTAATCACATGTTTATTCTG-----TCTGTGTTTACAGACAGTG

>Chimp

GGATGAAATATTCCAGGCACCAAGAA-GGTGCTT-ATACCAAAGCTATCGGTCTCCCCCTCTCAGTTACTCCAAGAT  
CCCAAACAGCTATACTTGCT----AAATGTGTGTAA----tgta-----cactatttgggta  
gtggttacaataaaaaatccagacttcaccactgtgtagtatatccttgtagcaaaaattgaacttgtgccacttaaatt  
tat-----ata-----AAT-AAATATATTCTGAA----TACCATAACACTTA--TCTGTATCATAG  
CCTTCTCATCATATTCTAATCGCATGTTTATTCTA-----TCTGTGTTTACTGACAGTG

>Orangutan

GGATTAAATATTCCAGGCATCAAGAA-GGTGCTT-ATACCAAAGCTATCGGTCTCCCCCTCTCAGTTACTCCAAGAT  
CCCAAACAGCTATACTTGCT----AAATGTGTGTAA----tgta-----cactatttgggta  
gtggttacactaaaaatccagacttcacaactgtgtaatatatccttgtagcaaaaactgcacttgtgccacttaaatt  
tatataaataaatag--ata-----AAT-AAATATATTCTGAA----TACCATAACACTTA--CCTGTATCATAG  
CCTGCTCATCATATTCTAATCGCATGTTTATTCTA-----TCTGTGTTTACTGACAGTG

>Rhesus

GGATGAAATATTCCAGGCCTCAAGAA-GGTGCTT-ATACCGAAAGCTATCAGTCTCCCCCTCTCAGTTACTCCAAGAC  
CCCAATTGGCTATAGTTGCT----AAATGTGTGTAA----tgta-----cactatttgggta  
atggttacactaaaaatccagacttcaccactgtgtaatatatccttgtagcaaaaactgcacctgtgccacttaaatt  
tatataaataaatag--ataaata----AATATGGTATATTTTGAA----TACCATAACA-TTG--TCTGTATCATAG  
CCTGCTCATCATATTCTAATCGCATGTTTATTCTA-----TCTGTATTTGCTAACAGTG

>Marmoset

GGATGAAATATTCCAGGCCCCGGGAA-GGTCCCT-ACACCAAAGCTATTGGTCTCCCCATCTCAGTTACTCCAAGAT  
CCTAAAGGGCTATATTTACT----AAATGTGTGTAA----tght-----cactattcaggta  
atggttacactaaaagcccagacttcaccactgtgtaatatatccttgcagcaaaaactgcacttgtgccac-----tt  
tat-----ataa-----ATAAAGTATATTCTGAA----TACC-TAACACTTA--GCTGTATCATAG  
CTTCTCATCATATTCTAATCACATGTTTATTCTA-----TATGTGTTTACCAACAGTG

>Tarsier

GGATGAAATGTTCTAGGACCCAAGAAGGGTAATT-ACACCAAAGGCATGTGTCTCACCCCTCTCAGTTACTCCACGAT  
TTCAAATGACTATACTTGCT----CAACAAGTATCA----tggg-----cactgtatggggtg  
atgattacactaagagtctagaccttaccagtaagcaatatatccacaaaaacaaaattgtatttatatcccttaaatt  
tacagaaataaaaatgtaaaaa-----ATAAAGCATATTCTGAA----TACCATAGCAC-----CTGTGTCAGAG  
AATGCTCATCACATTCTATTTGCATGTTTATTTA-----TGTCTTTATCAACAACA

>Bushbaby

GGAGGAAATATTACAGACCCCAAGAAGATGACT-ACA-CAAAGGTGTCTATCTCAA-----TTGTTCCAAAAT  
CCCAAAGGGCTATACTTACT-----  
-----  
-----CAAAGTATGTTCTAAA----AACCATAACATTTA--TCTGTGTTGTAC  
CATGCTCATCACATTCTAAATTCATGCTTATCCA-----TCTATCTTAACTGACAGTG

>Mouse\_lemur

GTAGGAAATATTCCAGGTCCTCAAGAAGAGTGCCT-ATACCACAAAGTATCTGTCTCACTCTCTAAGGTACTCCAAGAT  
CCCAAAGGGCTACACTTACT-----  
-----  
-----CAACAGTGTATTCTGAG----TTCCATGGCATGTA--TCTGTGTCATAG  
CATGCTCATCACATTCTAGTTGCAAGTTTATGCA-----ACTGTCTTTACTGACAGTG

```

>Tree_shrew
CAAGAAAATATTCCAAGTCCAATGAGAATGCCTAATACCAAAGTTTTCTGCCTCAACCTCTCATTTACTCCCAGCT
CTCAAAGCACTATACTTCCT-----
-----
-----TGGTAGCTCTGAA----TACCTTAACATTTTTTTCTGGGTTATAA
CTTGCTCATCACATTCTAATTGCATGTTAATTCATCCTTTTTGTTTTATTTTCATCTGTTTTTACCAACAGTG
>Mouse
AGCAGGAATGTGGTGGGTCTCATGAAGAATGACT--TTATGAATGGTGTGTCAGTCTAACTGTCTCACTTATTCTAAGAT
CCCAAAGTGCT-----TGCT-----
-----
-----CAAGAGCATATTTTGA-----TTCCACAGCAATCA--TTGTTCATAACAG
CATGAACTTTACCTTTTG-GTG--TGCTCATCCC-----TACTTAGTTAGTTAGCAAC
>Dog
GGG--GAACATTCCAGGCCCAAGTAAAGGGCTT-ATCTCTAAAGGTGTCTTTCTGACACTCTTCATTACTCCAAGAT
CCCAAAGGACCACATTTACT-----
-----
-----CAAAAAGTACTTTCTGAT----TACTGTAACAATTA--TCTGTGCCACAG
CATGCTCAGCACATTCTAAATACCTGTTTGTCCA-----CCTGTCTTTACTGATGGTG
>Horse
GGGTGAAATATTCCAGGCACCAAGAAGAGTGCCT-ATACCAGAAGGAGT-----AACTCTTAGTTTTTCCAAGAT
CCC-AAGGGCCAGATGTGCT-----
-----
-----CAAAATTACATTCTGAA----TACCAGAATGATTA--TCTGTGCCATAA
CATGCTCATCACATTGTAAGTGCAGGTTTGTGCA-----TCTGTCTTTACTGATAGTG

```

## Marker L79

>L1PB4\_3'-End

```
-----  
-----aaac---aatcaac-agagtgagagacaacctacagaatgggagaaaaatatttgcaaactatgca  
tctgacaaggggctaatatccagaatctataaggaactcaacaactca-----acaagaaaaaaacaaacaacccc  
attaaaaagtgggcaaaggacatgaacagaca-----  
-----  
-----tttttcaaagaagacatacaagcggccaacaaacatatgaaaaaatgctcaacatcactaatcatcag  
agaaatgcaaattaaaaccacaatgagataccatcttacaccagtcagaatggctattattaaaaagtcaaaaaaca  
cagatgttggcgaggatgctggagaaaaggaacgcttatacactggttggggaatgtaaattagtacaacctctatg  
gaaaacagtatggagatcttctcaaagaactaaaaatagaactaccattcgcaccca-gcaatcccactactgggtatct  
acccaaaggaaaagaaat---cattatatcaaaaagatacctgcactcgtatgtttatcgcagcactattcacaatag  
caaagatatggaatcaacctaagtgtccatcaatggatgactggataaagaaaatgtggt-----a  
tatatacaca-----tgggaacta  
ctcagccataaaaaagaatgaaatcatgtcttttgcagcaacatggatggaactggaggccattatcctaagtgaaat  
aactcag--aaacagaaagtcaaat-----accgcatgttctcacttataagtgggagctaaacaatgkgtacacatg  
gacatacagagtggaataatagacactggagactcmgaaaggtgggaggggtggga-ggggggtgagggatga-gaaat  
tacctawtgggtacaatgtaca-ctattcgggtgatggktacactaaaagcccagacttcaccactacgcaatatac  
catgtaacaaaactgcacttgtaccccctaactctataaaaaataaaaaa-----  
-----
```

>Human

```
ATGGGTTTATAGAGATAAGAGGCAATATCTTAGTAACCAACACAAGTGTCTTTCAAATCCCAGTCTCTTTTCAT---AAAC  
TCCTATTGGATTAAAT---aatcaac-agagtgagagagagcctacagaatgggagaaaaataacttgcaaactatgca  
tccaacagaaaactaatatccggaatttacaaggcactcctacaactcagtgacagcaaaaaacaacaaaaataacccc  
attaaaaagtggacaaggacatgaatatgta-----  
-----  
-----tttttcaaagaagatatacaaatgggtcagcaagcatatgaaaa-tgcttaacatcactaatcatcag  
aaaagagcaaattaaaaccacaatgagtttagcatcttataaccagttaggatggctattactaaaaatacaagaaataa  
cggatgtcgcagtaggatgagagaaaaatggaacactcatacacaattattgagaatataagttagaacaacctctatg  
gaaaacagtttggagatcttctcaaataactacaaatagaactaccattcaaacca-gcaatcccactactgggtatct  
acccaaaggaaaaaaaaa---ttgttatatcaagaagatacctgcattcatatgtttattgcaatactattcataatag  
caaagatatggaatcaacctaactgttcatctacagatgattggataaagaaaatgtggt-----a  
tacatatgtac-----aatggaacta  
ttcagtcatagaaaaagaatgaaattgtgtcttttgcactacatggatggaactggagggtcattgtcttaagtgaac  
aactcag--aaacagaaaaatactg-----tgcgttctcacttattcataggaagtaataatgtgtacacatgggca  
ta-----gagtgtagaataataggcattggagactaaaaggtgagggagtagaattgggggtagatgttga-gaaat  
tacctaattgggtataatgtaca-ttgttcaggtgatggctactctataaggccagacttcaccactacacaatatac  
tatataacaaaattatacttgtacttcttaattt---AAACCCCCAAAA--AT-----TTCCTACAGTATC  
ACTTGGAACACAGCTCTCACCTGCTCCAATATCTTCATGTCTATTGAGCAAAGGAAATTC AATAC
```

>Chimp

```
ATGGGTTTATAGAGCTAAGAGGCAATATCTTAGTAACCAACACAAGTGTCTTTCAAATCCCAGTCTCTTTTCAT---AAAC  
TCCTATTGGATTAAAT---aatcaac-agagtgagagagagcctacagaatgggagaaaaataacttgcaaactatgca  
tccaacagaaaactaatatccggaatttacaaggcactcctacaactcagtgacagcaaaaaacaacaaaaataacccc  
attaaaaagtggacaaggacatgaatatgta-----  
-----  
-----tttttcaaagaagatatacaaatggtaagcaagcatatgaaaa-tgcttaacatcactaatcatcag  
aaaagagcaaattaaaaccacaatgagtttagcatcttataaccagtcagcatggctattactaaaaatacaagaaataa  
cggatgtcgcagtaggatgagagaaaaatggaacactcatacacaattattgagaatataagttagtacaacctctatg  
gaaaacagtttggagatcttctcaaataactataaatagaactaccattcaaacca-gcaatcccactgctgggtatct  
acccaaaggaaaaaaaaaaattgtttatatcaagaagatacctgcattcatatgtttattgcaatactattcataatag  
caaagatatggaatcaacctaactgttcatcaagagatgattggataaagaaaatgtggt-----a  
tacatatgtac-----aatggaacta  
ttcagtcatagaaaaagaatgaaattgtgtcttttgcactacatggatggaactggagggtcattgtcttaagtgaac  
aactcag--aaacagaaaaatactg-----tgcattctcacttattcataggaagtaataatgtgtacacatgggca  
ta-----gagtgtagaataataggcattggagattaaaaggtgagcaagtagaattgggggtagatgttga-gaaat  
tacctaattgggtataatgtaca-ttgttcaggtgatcgtactctataagaccagacttcaccactacacgatatac  
tatataacaaaattatacttgtacttcttaattt---AAACCCCCAAAA--AT-----GTCCTACAGTATC
```

ACTTGGAACACAGCTCTCACCTGCTCCAATATCTTCATGTCTATTGAGCAAAGGAAATTCAATAC

>Orangutan

ATGGATTTAGAGCTCAGAGGCAATATCTTAGTAACCAACACAAGAGTCTTTCAAATCCCAGTCTCTTTTCAT---AAAC  
TCCTATTGGATTAAAT---aatcaac-agagtgaacagagagcctacagaatgggagaaaataacttgcaaactatgca  
tccaacagaaaactaatatccggaatttacaaggcacttctacaactcaatgacagcaacaacaacaaaaataacc  
attaaaaagtggacaaaggacatgactatgta-----

-----tttttcaaaagaagatatacaaatgaccagcaagcatatgaaaa-tgcttaacatcactaatcatcag  
aaaagagcaaattaaaaccacaatgagtttagcatgttaccagtcaggatggctattactaaaaatacaagaaataa  
cggatgttgatgaggatgcagagaaaatggaacactcatacacaattattgagaatataagtttagtacaacctctatg  
gaaaacagtatggagatctcacaataactacaaatagaactaccattcaacca-gcaatcccactactgggtatct  
acccaaaggaaaaaaaaa--ttgttatatcaagaagatacctgcattcatatgtttattgcaatactattcataatag  
caaagatatggaatcaacctaactgtccatcaacagatgattggataaagaaaatgtggf-----a  
tacatttgtac-----aatggaatacta  
ttcagtcatagaaaagaatgaaattgctgtctttttcaactacatggatggaactggaggtcattgtcttaagtgaac  
aactcag--aaacagagaaaatactgtgctgtgcttctcacttatttggtaggaagtaataatgtgtacacatggaca  
ta-----cagtgtagaataataggcattggagactaaaagggtgagggagtagaatggggatagatgttga-gagat  
tatctaattgggtataatgtaca-ttgttcagggtgatggatactctataaggccagacttcaccactacacgatatac  
tatatacaaaaattatacttgtactccttaattt-----AAACCCCCAAAA--AT-----TTCCTACAGTATC  
ACTTGGAACACAGCTCTCACCTGCTCCAATATCTTCATGTCTATTGAGCAAAGGAAATTCAATAC

>Baboon

ATGGGTTTATAGAGCTAAGAGGCAATATCTTAGTAACCAACACAATATCTTTCAAATCCCAGTGTCTTTTAT---AAAC  
TCCTATTGGATTACAT---aatcaac-agaatgaacagagagcctacagaatgggagaaaataacttgcaaactattca  
tccaacagaataactaatatctggaatttacaaggaactcctacaaccaatgacagcaacaacaacaaaa--aatccc  
attaaaaagtgggcaaggacatgaaatgta-----

-----tttttcaaaaggagatatacaaatggccagcaagcatatgaaaa-tgctt---atcactaatcatcag  
aaaagggcaaattaaaaccacaatgagtttagcatcttataaccagtcaggatagctattactaaaaatacaaaaaataa  
cggatgttgatgaggatgcagagaaaatggaacactcatacacaattgggtgagaatataagtttagtacaacctctttg  
gaaaacagtatggagatctcacaataactacaaatagaactaccattcaacca-gcaatcccactactgagatct  
acccaaaggaaaaaaaaa-attgttatatcaagaagatacctgcatttgtatgtttattgcaacagtatcacaatag  
taaaaatattggaatcaacctaactgtccatcaacagatgattgaataaagaaaatgtgct-----a  
tacatgtgtac-----agtggagtacta  
ctcagtcatagaaaagaatgaaatcgtatctttttctactacatgaatggaaccggaggtcattgtcttaagggagac  
aactcag--aaacagaaaagtaactg-----tgtgttctcacttattagtgagaaaataaataatgtgtacacatggaca  
ta-----gagtgtagaatgataggcattggaaactgaaagggtgagggagtagaatgtggaatggatgttga-gaaat  
tacctaattgctataatgtaca-tttttcagggtgatggatactctaaaaggccagacttcaccactacacgatatac  
tatatacaaaaattatgcttgt-----

>Marmoset

ATGGGTTTATAGAGCTAACAGGCAGTAGCTTAGTAACCAACACAATATCTTTCAAATCCCAGTCTCTTTTAT---AAAC  
CCCTATTGGATTAAAT---aattaac-agagtgaacagacagcctatggaatgggagaaaataactaacaactctgca  
tccaacagaaaactagatctggaatttacaaggaattcctacaactcaatgatagcaagaacaacaaaaataatcct  
attaaaaagtgggcaaggacatgaatacaaaccttttttaaaagaagatatacaaatggccagcaagcatatgaaaa  
tacttaacatcactaatcatcagagaagtgc aaattaaaaccacaatgagatagcatcttataaccagtcagggtagct  
aatacaaaccttttttaaaagaagatatacaaatggccagcaagcatatgaaaa-tacttaacatcactaatcatcag  
agaagtgc aaattaaaaccacaatgagatagcatcttatacaagt cagggtagctattactaaaaatacaagaaataa  
cagatgttgatgaggatgcagagaaaatagaacacttatacacaattggtaagaatataaattagtagcaacctccatg  
gaaaacagtggtggagatctcacaataactacaaatagaactactattcaatcca-gcaatcctactactaggtatct  
gccc aaaggaaaaaaat---gttatatcaaaaagatcctgcatttgtatgtttattacagcattgttccataatag  
caaagatatggaatcaacctaactgtccatcaacagatgattggataaagaaaatgtggf-----a  
tacatatgtac-----aatgaaatacta  
ttcagtcatagaaaagaatgaagtcatgtctttttgcaactacgtggatgggactggaggccattgtcttaagtgaac  
aactcag--aaacataaaaaactg-----tgtgttctcacttattagtggggagtaataatgtgtatgcatggaca  
tt-----gaatatagaatgatagaccttggagactgaaagggtgagggagtagcaagtgaggatgtagatgttga-gaaat  
tacctaattgggaataatttgca-ttattcagggtgatggatactctaaaaggccagacttcaccagtagcataatatttc  
tatat-acaaaattgtacttttactccttaattt-----ATACCATATAAAA-TAT-----TTCCTGCAGTATT  
ATTTGGAACACATCTCTCACCTGCTCAAATACCTTCATGTCTATTGAGCAAAGTAAATTCAATAC





## Marker L84

>L1PB4\_3'-End

```
gacatacagagtggaata-----atagacactggagactcmg
aaaggtgggaggg-----
-----tggggaggggggtgagggatgagaaattacctawtgggtacaatgtac
actattcgggtgatggktacactaaaagcccagacttcaccactacgcaatatatccatgtaacaaaactgc---act
tgtaccccctaaatctataaaaaataaaaaa-----
-----
```

>Human

```
AAAATTTCTACCCATCTGTTTGTCTACATATCTATTTATTGAG-AGCATGAAGGATAAAGAAAATGTGGCAAATACC
AATATTTGGGAAATCTGGATTAAGGGAAAACAAGAATTCTTT-----TTTGGAAGTTTTT-GTAGGTC--AAA
TCATTTTATAAC---AAAAAGTTAATAA---taggggaggggtgagggatgagaaattathtaaggttactgtgtac
actatthgggtgatggctacactaaaaatgcagacttcaccagtatataatataatccatctaacaaaacaac---att
tgtac-cccaaatctataa----CAATAAAAATAA---GTTTTGT-AAATTAGAAAGACATCTTACCATTGTTTTAA
TTTGCAATTT--TTAA--TTTTTTGCAAGCGTGAACGTTTTTCATGTTTAATTGGTTTTGAGCCTTATTTACAAAGTTTT
CAATGTTTCAA
```

>Chimp

```
AAAATTTCTACCCATCTGTTTGTCTACATATCTATTTATTGAG-AGAATGAAGGATAAAGAAAATGTGGCAAATACC
AGTATTTGGGAAATCTGGATTAAGGGAAAACAAGAATTCTTT-----TTTGGAAGTTTTT-GTAGGTC--AAA
TCATTTTATAAC---AAAAAGTTAATAA---taggggaggggtgagggatgagaaattathtaaggttactgtgtac
actatthgggtgatggctacactaaaaatgcagacttcaccagtgatataatataatccatctaacaaaacaac---att
tgtac-cccaaatctataa----CAATAAAAATAA---GTTTTGT-AAATTAGAAAGACATCTTACCGTTGTTTTAA
TTTGCAATTT--GTAA--TTTTTTGCAAGGGTGAACGTTTTTATATTTAATTGGTTTTGAGCCTTATTTACAAAGTTTT
CAATGTTTAAA
```

>Orangutan

```
AAAATTTCTACCCATCTGTTTGTCTATGTATCTATTTATTGAG-AGAATGAAGGATAAAGAAAATGTGGCAAATACT
AATATTTGGGAAACCCGGATTAAGGGAAAACAGGAATTCTTT-----TTTGGAATTTTTT-GTAGGTC--AAA
TCATTTTATAAC---AAAAAGTTAATAA---taggggaggggcatggatgagaaattathtaacgggttactctgtac
actatthgggtgatggctacactaaaaatgcagacttcaccagtatataatataatccatctaacaaaacaacattatt
tgtac-ctccacatctataa----TGATAAAAATAA---GTTTTGT-AAATTAGAAAGACATCTTACTGTTGTTTTAA
TTTGCTTTT--TTAA--TTTTTTGTGAGGGTGAAGGTTTTTCATGTTTAATTGGTTTTGAGCCTTATTTACAAAGTTTT
CAATGTTTGAA
```

>Baboon

```
AAAAATTCTACCCATCTGTTTGTCTACATGTCTATTTATTGAG-AGAATGAAGGATAAAGAAAACACGGCAAATACC
AATATTTGGGAAATCTGGATTAAGGGAAAACAGGAATTCTTT-GTTCT-TTATTGGAACTTTTTT-GTAAGTA--AAA
TCATTTTATAAT---AAAAAGTTAATAA---tgggggaggggtgagggataagaaattathtaaggttaccatgtac
actatthgggtgacggctacactaaaaccagacttcaccactatgcaatatatctatgaaacaaaacaac---att
tgtacaatttaaatctataa----CAATAAAAATAA---GTTTTGT-AAATTAGAAAGACATCTTACTGTTGTTTTAA
TTTGCAATTT--TTAA---TTTTTGTGACGGTGAACGTTTTTCATATTTAATTGGTTTTGAGCCTTATTTATAAAGTTTT
CAATGTTTAAA
```

>Rhesus

```
AAAAATTCTACCCATCTGTTTGTCTACATATCTATTTATTGAG-AGAATGAAGGATAAAGAAAACATGGCAAATACC
AATATTTGGGAAATCTGGATTAAGGGAAAACAGGAATTCTTT-GTTCT-TTATTGGAACTTTTTT-GTAAGTC--AAA
TCATTTTATAAT---AAAAAGTTAATAA---tgggggagggagtgagggataagaaattathtaaggttaccatgtac
actatthgggtgatggctacactaaaaccagacttcaccactatgcaatgtatctatgaaacaaaacaac---att
tgtacaacttaaatctataa----CAATAAAAATAA---GTTTTGT-AAATTAGAAAGACATCTTACTGTTGTTTTAA
TTTGCAATTT--TTAA---TTTTTGTGACGGTGAATGTTTTTCATATTTAATTGGTTTTGAGCCTTATTTATAAAGTTTT
CAATGTTTAAA
```

>Tarsier

```
-----AAGAAAAATGTGGC---ATATT
AAATTTGGGAAATCTGGATAAAGGGAAAACAGGAATTCTTGTGTTAT-TTATGGGAACATTTTTGGTAAGTC-AAAA
TTATTTTATACT---AAAAGTTAAAAA---tggggaag-----agggatgagaaattacttagtggatagctgaac
actatthgggtgatggctacactaaaaccagacttcaccactatgcaatgtatctatgaaacaaaacaac---att
tgtaccccctaaatct-----A--TGAAAAAAA---GTTTTGA-AAATTATAAAGACATCCTTCTGTTATTTAA
TTTGCAATTT--TTAATTTTTTTTTTGGAGGATGGATA-GTTCATGTTTAATTGACTTTGAGTTTTCTTTACGAAGTTTT
```

CAGTGTTTAAA  
 >Bushbaby  
 AAAAATTCTATCCATTTGTTTATGTATCTATTTATTTATTGAG-AGAATGAAGGACAAAGAGAATGTGGCAAAA----  
 ATCATGTGGGGAATCTGGATTAAGGGAAAACAGAAATTCCTTT-ATACTATTATTGCAGCTTTCTT-GTAAGTC--GCA  
 TTATTTTACAAT-----  
 -----  
 -----AAAAAGTAAAAA---GTTTTTC-AAATTAGGTAGACATCTTATTGTTGTTTAG  
 TTTACATTTTCTTGA--TATTTTGTGAGGATGGATGTTTTCATGTTTCATTGGCTTTGAGTCTTACTTGCAAAGTTTT  
 CAGTGTTTAGA  
 >Mouse\_lemur  
 AAAAATTCTGTCTATTTGTCTGTGTATC----TATTTATTGAG-AGAATGAAGGATAAGGAAAATCTGGCTAAATACT  
 AATATTTTGGGAATCTGGATTAAGTGAAAACAGAAATTCCTTT-GTACTATTACTGTAACTTTTTTT-GTAAGTC--AAA  
 TTATTTTACAAT-----  
 -----  
 -----AAAAAGTAAAAA---TGTTCTTCAAATTAATAGAGATCTTATTGTTGTTTAG  
 TTAGTATGTTCTTGA--TTCTTTGTGAGGATGGATGTTTTCATGTTTAATTGGCTTTGAGTCTTATTTACAAAGTTTC  
 CAATGTTTCAA  
 >Tree\_shrew  
 AAAATT----CCGTTTGTCAATTTATCCATTTATTTATTGAGAAAAATAAATGAT--TAAAAATGTGGCATAATGCT  
 AATATTTGGGGTATTTGGATTAAGGAATAATAGGATATTTTT-GTACT----ATTCAACTTTTTTGGTAAGTC--AAC  
 TTAATTTA---C-----  
 -----  
 -----AAAAAGTAAAAA---GTCTTGT-GACTCAGAAATTTT---ATTGTTGTTCAA  
 TTTATATTTCTTTAA--ATTTTTGCAAGGATGAATGTTTTTATTTTTAATTGGCTTTGAGTCTTAATTACAAAGTTTT  
 CAGTGTTTAAA  
 >Horse  
 -----CCTCTCTATCCATTTGTCAAC-----TGAG-AGAATGAATAATAAAGAAAATGTGGTAAAAATATT  
 AATATTTCGGAAATTTGGATTAAGGTATAACAAGAATTCCTTT-GTATTATTATTACAACGCTTTT-GTAAGTCAGAAA  
 TTATTTTGAAT-----  
 -----  
 -----ATAAAGTAAAAA---ATTTTAC-AAGTTACATAGAC-----ATGTTTAA  
 TTTGCATTT--TTTG--T---GAGTGAG--GAGGGTTTTAATGTTCAATTAGCTTTGAGTCTTATATGCAAAGTTTT  
 CAATGTTCAA



## Marker L85

>L1PB4\_3'-End

```
-----ggggtgggaatg
-----taaat---tagtacaacctctatggaaaacagtatggagatttctcaaagaactaaa
aatagaactaccattcgatccagcaatcccactactgggtatctacccaaggaaaagaatcattatatcaaaaaga
tacctgcactcgtatgtttatcgcagcactattcacaatagcaagatatggaatcaacctaagtgtccatcaatgga
tgactggataaagaaaatgtggta----tatatacac-----
----ca-tggaatactactcagccataaaaaagaatgaaatcatgtccttttgagcaacatggatggaactggaggcc
attatcctaagtgaataactcagaaa-----cagaaagtcaaataccgcatgttctcacttataa
gtgggagctaaacaatgkgtacacatggacatacagagtggaata-----ataga
cactggagactcmgaaagggtgggaggggtgggaggggggtgagggatgagaaattacctawtgggtacaatgtacacta
ttcgggtgatggktactactaaaagcccagacttcaccactacgcaatatatccatgtaacaaaactgcacttgtacc
cctaaatctataaaaaataaaaaaa-----
-----
```

>Human

```
CTAACTCCACAACCTTAGTGATGGTCTGT-GCTTG--GACTAGTTATTTAATTTCCCTAGGACCTTAATACTGTCCACA
TAAGACTGTAGGATT---AAATAAAT---tagtacaacctctatggaaaacaatattggagatttctaaaagaactaaa
catagaactaccatttgatctggcaatactactactgggtatctacccaaggaaaataaatcattatattaaaaaga
tgcttgcataaggtatgtttatctcagcactattcacaattgcaagatatggaatcaacccaagtatccatcagtgga
tgattggatttttaaaatgtgggtg----tatatatat-----a
tgtgcaatggaatactactcaagcat-aagaagaacaaaatcatgtccttttgagcaacatggatggaactggaagca
a-----ttaagtg----aactcagaaa-----cagaaaatgaaacactgcatgttcttagttataa
gtgggagtgaataattcatatacgtgggcatagacactggagttataagcaggagtgaataattcatacacatgga
ataatggacactggagactgagaagagtgggaggggggtgagggatgagaaattacttgaggagtacagtggtgacta
ttcaggtaatggctataactaagagcccagatttcaccactatgcaatatatccatgtaacaaaactgcacttgtatcc
cctaaatctatatacgtttt-----AAA-AAAAAATT---ATGTCTCATGGCATAT-GTAAGCAC-TCAATTAATT
CGAG----TTATTA---ATGTTAATATTTTAGGTGAGATTA
```

>Chimp

```
CTAACTCCACAACCTTAGTGATGGTCTGT-GCTTG--GACTAGTTATTTAATTTCCCTAGGACCTTAATACTGTCCATA
TAAGACTGTAGGATT---AAATAAAT---tagtacaacctctatggaaaacaatattggagatttctaaaagaactaaa
aatagaactaccatttgatctggcaatactactactgggtatctacccaaggaaaataaatcattatattaaaaaga
tgcttgcataaggtatgtttatcttagtactattcacaatcgaagatatggaatcaacccaagtatccatcagtgga
tgattggatttttaaaatgtgggtg----tatatatat-----a
tatgcaatggaatactactcaagcat-aagaagaacaaaatcatgtccttttgagcaacatggatggaactggaagca
attatcttaagtgaataactcagaaa-----cagaaaatgaaacactgcatgttcttagttataa
gtgggagtgaataattcatatacataggtatagacactggagttataagcaggagtgaataattcatacacgtgga
ataatggacactggagactgagaagagtgggaggggggtgagggatgagaaattacttgagg-----agtgtgacta
ttcaggtaatggctataactaagagcccagatttcaccactatgcaatatatccatgtaacaaaactgcacttgtatcc
cctaaatctatatacgtttt-----AAA-AAAAAATT---TGTCTCATGGCATAT-GTAAGCAC-TCAATTAATT
CGAG----TTATTA---ATGTTAATATTTTAGGTGAGATTA
```

>Orangutan

```
CTAACTCCACAACCTTAGTGATGGTCTGT-GCTTG--GACTAGTTATTTAATTTCCCTGGGACCTTAACACTGTCCACA
TAAGACTTATAGGATT---AAATAAAT---tagtacaacctctatggaaaacaatattggagatttctaaaagaactaaa
aatagaactaccatttgatccggcaatactactactgggtatctacccaaggaaaataaatcattatattaaaaaga
tgcttgcataaggtatgtttatctcagtagtattcacaatagc-aagatatggaatcaacccaagtatccatcagtgga
tgattggatttttaaaatgtgatg----tatatatat-----a
tatgcaatggaatactactcaagcat-aagaagaacaaaatcatgtccttttgagcaacatggatggaactggaagca
attatcttaagtgaataactcagaaa-----cagaaaatgaaacactgcatgttcttagttataa
gtgggagtgaataattcatacacgtgggcatagacactggagttataaatgggagtgaataattcatacacgtgga
ataatagacactggagactgagaagagtggg-ggggggtgagggatgagaaattacttgaggggtacagtggtgacta
ttcaggtaacggctataactaagagcccagacttcactactatgcaatatatccatgtaacaaaactgtacttgtatcc
cctaaatctatataccttttt-a----AAA-AATATATT---ATGTCTCATGGCATAT-GTAAGCAC-TCAACTAATT
CAAG----TTATTA---ATGTTAATATTTTAGGTGAGATTA
```

>Boon

```
CTAACGCCACAACCTTAGTGATGGTCTGT-GCTTG--GACTAGTTATTTAATTTCCCTAGGACCTTAATCCTGTCCACA
TAAGGCCACAGGATT---AAATAAAT---tagtacaacttctatggaaaacaatattggagatttctaagagaactaaa
```

aatagaactaccatttggatccagtgataccactactgggtatctgcacaagggaaaagaaatcattatattaaaaaga  
tgcctgcgatgtatgtttatctcagtactattcacaatagcaaagatatggaatcaattcaagtatccatcagtgga  
tgattggatTTTTAAATgtggtg----tatacacac-----acacacacacacacacacacaca  
catgcaattgaatactactcaacat-aagaagaacaaaatcatgtcttttgcagcaacatggatggaactggaggca  
attatcttatgtgaaataactcagaaa-----cagaaaatgagacactgcatgttcttagttataa  
gtggaagtgaataattcatacacgtggcatagacactggagttataagtgggagtgaataattcatacacatgga  
ataatagacactggagactgagaagagtggg-agggggtgagagatgagaaattacttgatgggtacagtgtgacta  
ttcaggtaatggctacactaagagcccagacttcaccactatgcaatataatccatgaaacaaaactgcacttgtatct  
cmetaatctatatacttttmetaa----AAA-TATATATT---ATGTCTCATGGCATA---TAAGCAC-TCAATAAATG  
CAAG----TTATTA---ATGTTAATATTTTAGATGAGATTA

>Rhesus

CTAAGGCCACAACCTTAGTGATGGTCTGT-GCTTG--GACTAGTTATTTAATTTCCCTAGGACCTTAATCCTGTCCACA  
TAAGGCCACAGGATT---AAATAAAT---tagtacaacctctatggaaaacaatgagatttctaagagaactaaa  
aatagaactaccatttggatccagtgataccactactgggtatctacacaagggaaaagaaatcattatattaaaaaga  
tgcctgcgatgtatgtttatctcagtactattcacaatagcaaagatacggatcaactaaagtatccatcagtgga  
tgattggatTTTTAAATgtggtg----tataatataatataacacacacacataatatacacatacacacacaca  
tatgcaattgaatactactcaacat-aagaagaacaaaatcatgtcttttgcagcaacatggatggaactggaggca  
attatcttatgtgaaataactcagaaa-----cagaaaatgagacactgcatgttcttagttataa  
gtggaagtgaataattcatacacataggcatagacactggagttataagtgggagtgaataatacatacacatgga  
ataatagacactggagactgagaagagtgggaggggggtgagggatgagaaattacttgaggggtacagtgtgacta  
ttcaggtaatggctacactaagagcccagacttcaccggtatgcaatataatccatgaaacaaaactgcacttgtatct  
cmetaatctatatacttttmetaa----AAA-TATATATT---ATGTCTCATGGCATAT-GTAAGCAC-TCAATAAATG  
CAAG----TTATTA---ATGTTAATATTTTAGATGAGATTA

>Marmoset

CTAACTCCACAACCTTAGTGATGGTCTGT-GCTTG--AATTAATTATTTAATTTCCCTAGGACCTTAAGACTGTCCACA  
TAAGGCTGTAGGATT---AAATAAAT---tagtacaacctctatggaaaacaacatgagattcctaaaagaactaaa  
aatagaactaccatttggatccagcaatacactactgagatctacctaaggaaaagaaatcattaaattaaaaaga  
tgcctgcgatgtatgtttatctcagtactattcacaatagcaaagatacagcatcaaccaagatccatcagtgga  
tgactggatTTTTAAATgt-----aatatata-----a  
tgcacaatgggatactactcaacat-aagaagaacaaaatcatgt-ttttgcagcaacatggataaaaactggaggcc  
attatcttatgtgaaataactcagaaa-----tagaaaatgaaacactgcttgttcttagttataa  
atgggagtgaataattcatacacatggacata-----gagt-----attga  
ataatagacactggagactgagaagaatggg--aggggtgagggatgagaaattacttgaggggtacaggggtgcaca  
tttaggtaatgtctacactaagagcccagatttcaccaccatgcaatataatccatgtaacaaaactggacttgtatcc  
cmetaatctatatacttttmetaa----AAA-AAGATATT---ATGTCTCGTGGCATAT-GTAAGCAC-TCAATAAATG  
CAAG----CTATTA---ATGTTAATATTTTAGGTGAGATTA

>Tarsier

CTAACTCCACAATTTAGTGACAGTCTAT-GCTTG--GCCAGTTATTTAATTTCCCTAACACCTTAATACCTTCCACA  
CAAGGCTATAGGATT---AAATAAAT---tagtacagtctctatggaaagtaatgtggagatttccaaaagaactaaa  
aacaggactaccattcaatccatc-attccactactgggtatctacccaaaggaaagtaaatattatgtcagaaaga  
tgcctgcgatgtatgtttatcacattactattcacaatagc-----aagtatctatcaacaga  
tgattgaa-ttttaacatgtagtt----tat-----a  
tatgcagaggaatattgctcagccataaaaaagaattaaatcatgtctttttcagcaacatagatggaagcagagggcc  
attatcttaactgaaataactcagaaacagaaataactcagaatcagaaagtcaaatattgcaagttctcactaataa  
gtg-----tgga  
ataatagatattggagactcaaaagtgtgtgagtggggtgacgaatgaggaactgcttgaggggtacagtgtaaacta  
ttcagtaatagctacacaaaagcccagacttcaccactatgcaatataaccacattacaaaactgcatttgggtc  
cctaaatctatgtaaattttgtt----CAA-AAGGTATT---ATGTCTCATGGTGCATGGTAAGCGT-TTCATAAATG  
CAAG-ATATTATTG---ATGCTAATATTTTAGGTGAGATTA

>Bushbaby

CCGACTCCATAACTTAATGATTGTTTGCACCTTAATGACCAGTTATTTAATT-CCCTAAGACCTTAATACCTTCCACA  
TTAGGCTGTGGGATT-----  
-----  
-----  
-----  
-----

-----  
-----  
-----  
-----AAATAAGATATT--ATAACTCATAGCACAAAGGTAAAGAC-TCAATAACTG  
CAAT---TTATTATTGATGTTAATATTTTTCGGTGATACTA

>Mouse\_lemur

CTGACTCCACAACCTTAATGACTGT----GCTTA--GACCAGTTATTTAATTGCCCTAAGACCTTAATACCTTCCACA  
TCAGGCTGTAGGATT-----  
-----  
-----  
-----  
-----  
-----  
-----  
-----  
-----  
-----  
-----

-----AAACAAGATATT--ATATCTCGTGGCACATGGTAAACAT-TCAATAAATG  
AAAG---TTATTGTGGATGTTAATATTTTTAGGTGATATTA

>Dog

CTGA-TCTACAACCTTAAAGGCTATCTGA-GCTTC--AACCACCTTATTTAATTTCTCTAAAGTTTTAATACCTTCCACA  
CAAGGATTAAGT-----  
-----  
-----  
-----  
-----  
-----  
-----  
-----  
-----  
-----  
-----

-----AAGATA-T--ATGTCTCATGGCACGGCACATGGTGAATACTCAAAT  
ACAAGTTTTTTTATTG--ATGTTAATAATT--TAAGATGA

>Horse

CTGACTCCACAATTCAATAGCTATCTGT-TCTTC--AACGAGTTATTTAATTTGCCT-AAGACTTAGTACCTTCCACA  
AAAGACTGTGGGATT-----  
-----  
-----  
-----  
-----  
-----  
-----  
-----  
-----  
-----  
-----

-----AAATAAGATATT--ATGTATCATGGCACATGCTGAGCACTTGATTAAGTG  
CAAG-TTTTTATTG--ATGTTAATATTTCAAGTAAGGTTA

## Marker L87

>L1PB4\_3'-End

```
-----actcagaa
acagaaagtcaaataccgcatgttctcacttataagtgggagctaaacaat-----
-----gkgtagacacatggacatacagagtgggaataatagacactggagactcmgaaaggtgggaggggtgggaggggg-
----gtgagggatgagaaattacctaawtgggtacaatgtacactattcgggtgatggktacactaaaagcccagactt
caccactacgcaatatatccatgtaacaaaactgcacttgtaccccctaaatctataaaaaataaaaaa-----
-----
-----
```

>Human

```
AA--TATAAATGAGGAACATAAAATGAAAATAGTGCAATTTACTAGAAAT-GACATCTGTAGTACAGATTTTCATCTA
GAAAATTGACT-----TTT-----TTTCCCTTTT-TACTAAAAATGACAGATTTTGCCTGGAA---AAA----TA
AT----gtgtgtacatggacatggagtgtggaatgatagacattggagacttagaaaagtgggggctcagaagagggg
agggacaggtgggtgacaaattatattaatgggtacagtgcattatatttgagtgactgggtgactaaaaggcaagactt
caccactatgcagtatactgggtgtaacaaaattgcactggatcccttaaatttagac----AAATACATT-----TC
TAAATTGTCCTCCCTAGAACATGGGTTATATCTATGTAGGTAGTCTCTTTGTTCTTCTTCTC-C TTATATTTCTGAG
TCATCTGAGATTTTAACTGAATTAATA-----TGGGGGGAGT-TTTT-GAATTCTCCCTATTCTC-----ATTCTGTG
ACCAGTTAAATTATAATCTCTTT-CCTAAACTGAATAATTTTCTTTTCCATAACCAGTGTGTTTCGAAAG
```

>Chimp

```
AA--TATAAATGAGGAAAATAAAATGAAAATAGTGCAATTTACTAGAAAT-GACATCTATAGTACAGACTTTTCATCTA
GAAAATTGACT-----TTT-----TTTCCCTTTT-TACTAAAAATGACAGATTTTGCCTGGAA---AAA----TA
AT----gtgtgtacatggacatggagtgtggaatgatagacattggagacttagaaaagtgggggctcagaagagggg
agggacaggtgggtgacaaattatattaatgggtacagtgcattatatttgagtgactgggtgactaaaagccaagactt
caccactatgcagtatattagtttaacaaaattgcactggatcccttaaatttcaac----AAATACATT-----TC
TAAATTGTCCTCCCTAGAACATGAGTTATATCTATGTAGGTAGTCTCTTTGTTCTTCTTCTC-C TTATATTTCTGAG
TCATCTGAGATTTTAACTGAATTAATA-----TGGGGGGAGT-TTTT-GAATTATCCCTATTCTC-----ATTCTGTG
ACCAGTTAAATTATAATCTCTTT-CCTAAACTGAATAATTTTCTTTTCCATAACCAGTGTGTTTCGAAAG
```

>Orangutan

```
AA--TATAAATGAGAAACATAAAATGAAAATAGTGCTATTTACTAGAAAT-GACATCTATAGTATAGATTTTCATCTA
GAAAGTTGAAT-----TTT-----TTTCCCTTTT-GACTAAAAATGACA--TTTTGCCTGGAA---AAA----TA
AT----gtgtgtacatggacatggagggtggagtgatagatatttgagacttagaaaagtgcgggctcagaagaggt-
----acaggtgggtgacaaattatattaatgggtacagtgcattatatttgagtgactgggtgactaaaagccaagactt
caccactatgcagtatattagtgtaacagaattgcactggatcccttaaatttagac----AAATACATT-----TC
TAAATTGTCCTCCCTAGAACATGAGTTATATCTATGTAGGTAGTCTCTTTGTTCTTCTTCTC-C TTATATTTCTGAG
TCATCTGAGATTTTAACTGAATTAAGA-----TGGGGGGAGT-TTTT-GAATTATCCCTATTCTC-----ATTCTGTG
ACCAGTTAAATTATAATCTCTTT-CCTAAACTGAATAATTTTCTTTTCCATAACCAGTGTGTTTCAAAG
```

>Baboon

```
AAAATATAAATGAAGAACATAAAATGAAAATAGTGCAATTTACTAGAAAT-GACATCTATAGTACAGATTTTCATCTA
GAAAGTTGAAA-----TTT-----TTCCCCTTTT-TACTAGAAATGACAGATTTTGCCTGGAA---AAA----TA
AT----gtgtgtacatggacatggagtgtggaatgatagacatcggagacttagaaaagtgggggctcagaataggg-
----acaggtggcgacacattatattaatgggtacagtgcattatatttgagtgactgg-----
-----ccttaaatttagac----AAATACATT-----TC
TAAATGTATTTCCCTAGAACATGAGTTATATCTATGTAGGTGCTCTCTTTGTTCTTCTTCTC-C TTATATTTCTGAG
TCATCTGAGATTTTAACTGAATTAATA-----TAGGGGGAGT-TTTT-GAATTATCCCTGTTCTC-----ATTCTGTG
ACCAGTTAAATTATAATCTCTTT-CCTAAACTGAATAATTTTCTTTTCCATAACCAGTGTGTTTGAAAG
```

>Rhesus

```
AAAATATAAATGAAGAACATAAAATGAAAATAGTGCAATTTACTAGAAAT-GACATCTATAGTACAGATGTTTCATCTA
GAAAGTTGAAA-----TTT-----TTCCCCTTTT-TACTAGAAATGACAGATTTTGCCTGGAA---AAA----TA
AT----gtgtgtacatggacatggagtgtggaatgatagacatcagagacttagaaaagtgggggctcagaacaggg-
----acaggtggcgacgcattatattaatgggtacagtgcattatatttgagtgactgggtacactaaaagccaggactt
caccactatgcagtatattcgtgtaacaaaattgcactggatcccttaaatttagac----AAATACATT-----TC
TAAATGTATTTCCCTAGAACATGAGTTATATCTATGTAGGTAGTCTCTTTCTTCTTCTTCTC-C TTATATTTCTGAG
TCATCCGAGATTTTAACTGAATTAATA-----TAGGGGGAGT-TTTT-GAATTATCCCTGTTCTC-----ATTCTGTG
ACCAGTTAAATTATAATCTCTTT-----AATTTTCTTTTCCATAACCAGTGTGTTTCGAAAG
```

>Marmoset

AAAATATAAATGAGGAAAATAAAATGAAAATAGTGCAATTTACTAGAAAT-GATATCTATAGTACAGATTTTCATCTA  
GAAAGTT-ACA-----TTT-----TTCCCCTTTT-AAC-AGAAATGACAGATTTTGCCTGGAA---AAA----TA  
AT----gtgtatacatggacatagagtgtggaatgatagacattggagacttagaaaagtgggggtgcagaagaggg-  
----atgggtgggtgataaagtatttaatgggtagaatgtgtattatttgagtgattgggtacactaaaagccaagactt  
caccactatgcagtttacttgtgtaacaaaattgcactgataacccttaaatttagac----AAACACATT-----TC  
TAAACCATCCTCACTAGAATGTAAGTTTTATTATGTAGGTAGTGTCTTTGTTCTTCTTCTC-CTTATATTTCTGAG  
TCATCTGAGATTTAAATTAATTAAC-----TGGGGGAGT-TTTT-AAATTATACCTGTTCTC-----ATTCTGTG  
ACCAGTTAAATTATAATCTCTTT-CCTAAACTGAATAATTTTCTTTGTCCAGAACCAGTGTGTTAGAAAAG

>Tarsier

AAAACATAAAGAAGAAACATGAAATGAAAATAGTGAGGTCTACTGGAAAT-GACATTTGTAGCACAGATTTTGTCTA  
GAAAGTTG--T-----ATT-----TTCCCCTTTT-CCATAGACATGGCAGATTTTAATTTGCA---AAAATTTT  
AT----gtgaacacatgggcatagagtgtagaatgacagacattggacactcagaaaagtgggagcaggggaaggggg-  
-----tgggtattgggaagttgcttaacgggtacaatgtacgttatcag-gtgatggatacactaatagccaggatgt  
cccc-ctgtac---cccccaatgtaataaaaattgcacgtgtgccccttaagttgtac---AAACAGATT-----TC  
TAGACTGTCTCACTAGGACATAAGCTATATCTATCCAT-TGGTCTCTTTGTTCTGCTTCTC-CTTACGTTTTCTGAA  
TCTTTAGAGATTCAAACGAATCAAAA-----GAGGGGAAT-TTCT-GAATTATCCCTGTTCTA-----ACTCTGTG  
ATCCATTAAATTATAATCTTTTTTCTAAACTGATTAATTTTCTTTATTTCATAACCAGCAAATTCAAAAG

>Bushbaby

AGAGTATAAATGAGGAACATACAATGAAAATGGTGAATTTACTGGAAAT-GACATTTATAGCATAGA-TTTCATCTA  
GAAAGTTGTAT-----CCTTTTT-TCAAAGGACTATCAGACTTTACCTTGAA-----  
-----  
-----AACCAAC-----TC  
TGAGTTGTCTCAGTAGAACATAAGCTACATCTATACACTGACTTTCTTCATTCTGTTTCTA-CTGACAATTCCTAAG  
TCTTCGAAATT-AAACTGAATTGAAA-----GGGAGGAGT-TTCT-TAATTATTCTTCTTCTG-----ACTTTGTA  
ATCAGTTAAATTATAATCT-TTT-CCTGAAGTGAATAATTTTCTTTTTCCATAACCAGCCAGTTCAAAG

>Mouse\_lemur

A-----TAAATGAAGGACATAAAACGAAAATAGTGAGATTTACTAGAAAT-GACATTTATAGCAGAGA-TTTCATCTA  
GAAAGTTGTGT-----TTT-----TTCCCCTTTT-TCATAGGAATGTCAGATTTTACTTTGAA-----  
-----  
-----AAACAAA-----TC  
TAAATTGTCTCACTAGAACATAAGTTACATCTATATGT--ACTCTCTTCATTCTGTTTCTA-TTTACATTTCTAAG  
TCTTCAGGGGTT-AAACTGAATTGAAA-----GGGAGGAGT-TTCT-GAATTATTATTCTTATG-----ACTCTGTG  
ATCAGTTAGATTATAATCT-TTT-CCTGAAGTGAATAATTTGTCTTTTTCCATAATCAGCTAGTTCAAAG

>Tree\_shrew

AA--TATAAATGAAGAACATAAAGTGGAACAGTAAGATTTA-----GT-GATATTTATAACACAGATTTTCTTCCA  
GAAAGTTGTATATTTTCAATTT-----CTTCTCTTTT-TCATAGAAATGAAAGATTTTACTTTGAA-----  
-----  
-----AAA-AATTT-----TC  
TAAATTGTTCTCACCAGAACATAAGCTACATCTGTGTATGTAGTCTTTTTGTTTCTGCTTTTA-CCCTCATTTCCTGAG  
TCTTCAGCAATTTAAGCTGAATTAAT-----GAGT-TTCT-AAATC-TCCCTGTAATC-----ACTCTGGG  
ATCAGTTAAATTATAATCTATTT-TCTAAACTGAATAGTTTTCTTTTCTTATAACCAGTGAATTCAAAAG

>Guinea\_pig

AG--TATAAATGAGGAATATAAATTTACAAGA-----TCTATTAAAG-----TAACACAAATT--TTTATA  
GAAAATTATAT-----T-----TTTCTTTT-TCATAGAAGTAACAAAATT-ACTGTGCA-----  
-----  
-----GAAAAAAGAGAATT-----TC  
TAAATAGTCTTCATCTGAGCATAAGCCACATCTATGTGTGTGGTCTGTT-----CCA-TTCATATTTTTTGA  
TCTTCAGAAATTTAACTTGTAAATA-----GGGGGATGC-TTGCCAAATTA--CCTGTTACC-----ATGCTGTG  
GCCAGTTCCATTATAATCTCCTT-TCTAAACTGAATAACTTCTTTTCTATGATCAGTGAGTTCAAAT

>Dog

AA--CAGAAAAG-----GTAAAAATAGTGAGATTTAGTAGATTTAGAAATTAGTAGTGT--TTTTTTTCTA  
GAAAGTTATAA-----TTTTTCTTTTCTTCTTTTGTTCATAGAAATGACAGATTTTCTCATTGAA-----

```
-----  
-----  
-----ACAAAAAT-----CC  
AGAATTATCCTTACTAGCACACAGGTCACATCCACGTGCATAGG---T--ACTCCCTTCTACCTTACTGCTCCCAAG  
TCTTCAGAGATTT-AGCTGAATTGAGTAGCCAGGGCGGGAGTGTTCT-GAATTATCCTGGTTTCCTGATGACTCTGTG  
ATC---AAACTGTAGTATCTTT-CC-AAACTGAATGATTGTCCTTTTCCATATCCAGGGAGTTCAGAAG  
>Horse  
-----ATGAAAGTAGTGAGATTCACTAGAATTAGAAATTTATAGCACAGATTTTCTTCTA  
GAAAGTTACAA-----TTTTTCTTTTTTACCTTTT-TCATAGGAATGACAGATTTTCATTTTGAA-----  
-----  
-----AAAAAAT-----TC  
TAAATTGTCCTTCTGGAGCCTAGGCTACATCTGTGTGTGTAGTCTCT--ATTCTGCTTCCA-CTCACATTTTCTGAC  
TCTTCAGAGATTTAAGCTGAATTAAG-GTGGGAGGGGGAGT-TTCT-GAATTATCCTTGTTGCC-----ACTCTGTG  
ATCAGTTAAATTATAATATCTTT-CCTAAACTGAATAAGTGTCTTTCCCGTATCCAGTGAGTTCAAAAG
```

## Marker L90

>L1PB4\_3'-End

```
-----  
-----gacatacagagtggaataatagacactggagac-----  
-----tcmgaaaggtgg  
gaggggtgggaggggggtgaggggatgagaaattacctawtgggtacaatgtacactattcgggtgatggktacactaaa  
agcccagacttcaccactacgcaatatatccatgtaacaaaactgcacttgtaccccctaaatctataaaaaataaaaa  
aa-----  
-----  
--
```

>Human

```
ATGCTCCTTCAACTTTTGAATTTTCATTCCATACCTGAGTTTCAAGATAAAAGCAGCAAGATTAATGATGCAATGAAAG  
TGCTGATCTTATTCTAAGAATTTTGCATATATGACTCCTAACAAAATAAA-AA-TGCTAAGTAAAAGCA---CATGC  
TCCTGGAACCACTGAAAAGGAGGTATTGAGATA-TTTGTTTTG---AACTAAGTGAAGAGAA---tcagaaggggtga  
gggggtgggaagtgggtggatgatgagaaattatttagtaggtacaatgtatggtatgtgggtaataacacctgaa  
agacctgatttcaccactatgcaatctatgcatgtaacgaaattacactagtagtcccataaacatgatgcaattttta  
aaaatttaaaaa-----AAAGAAAGTAATGTTAAA---TGGGAGCTTTCTCTGAAAAA-CTCTATTGATCTTTAGA  
AGTTACTTAAGGTACTAAAACATCAACCCA-TCTAGTGATTCACAGAAGAAGATATTATACTTGCTATCTCTAAGCC  
TT
```

>Chimp

```
ATGCTCCTTCAACTTTTGAATTTTCGTTCCATACCTGAGTTTCAAGATAAAAGCAGGAAGATTAATGATGCAATGAAAG  
TGCTGATCTTATTCTAAGAATTTTGCATATATGACTCCTAACAAAATAAA-AA-TGCTAAGTAAAAGCA---CATAT  
TCCTGGAACCACTGAAAAGGAGGAATTGAGATA-TTTGTTTTG---AACTAAGTGAAGAGAA---tctgaaggggtga  
gggggtgggaagtgggtggatgatgagaaattatttagcaggtacaatgtatggtatgtgggtaataacacctgaa  
agacctgacttcaccactatgcaatctatgcatgtaacgaaattacactagtagtcccataaacatgatgcaattttta  
aaaatt-aaaa-----AAAGAAAGTAATGTTAAA---TGGGAGCTTTCTCTGAAAAA-CTCTATTGATCTTTAGA  
AGTTACTTAAGGTACTAAAACATCAACCCA-TCTAGTGATTCACAGAAGAAGATATTATACTTGCTATCTCTAAGCC  
TT
```

>Orangutan

```
ATGCTCCTTCAACTTTTGAATTTTCATTCCATACCTGAGTTTCAAGATAAAAGCAACAAGATTAATGACGCAACGAAAG  
TGCTGATCTTATTCTAAGAATTTTGCATATATGACTCCTAACAAAATAAA-AATTGCTAAGTAAAAGCA---CATAT  
TCCTGGAACCACTGAAAAGGAGGAATTGAGATA-TTTGTTTTG---AACTAAGCAAGAGAA---tcagaaggggtga  
gggggtgggaagtgggtggatgatgagaaattatttagtaggtacaatgtatggtatgtggataataacaccagaa  
agccctgacttcaccgctatgcatgtaacgaaattacactagtagtcccataaacatgatgcaattttta  
aaaatt---aaa-----AAAAAAGTAATGTTAAA---TGGGAGCTTTCTCTGAAAAA-CTCTATTGATCTTTAGA  
AGTTACTTAAGATACTAAAACATCAACCCA-TCTAGTGATTCACAGAAGAAGGTATTATACTTGCTATCTCTAAGCC  
TT
```

>Baboon

```
ATGCTCCTTCAACTTTTGAATTTTCGTTCCATACCTGAGTTTCAAGATAAAAGCAACAAGATTAATGACGCAATAAAAG  
TACTGATCTTTTTCTAAGAATTTTGCATATATGACTCCTAACAAAATAAA-AA-TGCTAAGTAAAAGCA---TATAT  
TCCTGGAATCATCGAAAAGGAGGAATTGAGATA-TTTGTTTTG---AAACCAAGTAAAGAGAA---tcagaaggggtga  
aggggtgggaagtgggtgatgataggaaattatttagtaggtacaatgtatggtatgtaggtaataatcctgaa  
agctctgacttcaccactgtgcaatgtgtgcatgtaacgaaattacactagtagtcccataaacatgatgcaattttta  
aaaatt--aaaaaaag---AACTAAGTAATGTTAAA---TGGGAGCTTTCTCTGAAAAA-CTCCATTGGTCTTTAAA  
AGTTACTTAAGGTACTAAAATTATCAACCCA-CCTAGTGATTCACAGAAGAAGGTATTATACTTGCTATCTCTAATCC  
AT
```

>Rhesus

```
ATGCTCCTTCAACATTTTGAATTTTCGTTCCATACCTGAGTTTCAAGATAAAAGCAACAAGATTAATGACGCAATGAAAG  
TACTGATCTTTTTCTAAGAATTTTGCATATATGACTCCTAACAAAATAAA-----  
-----agggtga  
aggggtgggaagtgggtggatgataggaaattatttagtaggtacaatgtatggtatgtaggtaataatcctgaa  
agctctgacttcaccactatgcaatctgtgcatgtaacgaaattacactagtagtcccataaacatgatgcaattttta  
aaaattaaaaaaaaag---AACTAAGTAATGTTAAA---TGGGAGCTTTCTCTGAAAAA-CTCTATTGGTCTTTAGA  
AGTTACTTAAGGTACTAAAACATCAACCCA-CCTAGTGATTCACAGAAAAGATATTATACTTGCTATCTCTAATCC  
AT
```

>Tarsier

ATGTTTCCTTCAACTTTTAGAATTTTGTTCAA-ACCTGAGTTCAGAAT-AAAGCAGCAAAGTTAATGACACAATGAAAG  
TAGTGATTTT-TTCTATGAATTTT----TAC-----AAATAAA-AA-TACTAAGTAAAAGCA---CATAT  
TCCTGGAACCACTAAAAAGAGGAAGTCATATATTTTATTTTG---AAACTAAGCAAGAAGAC---ttagaagagtga  
aggaatagga--gggtggataaagagaaattacttaataagtgaatgtatgttatttgggtgacagtttccctaaa  
agccctgacttcaccacttcgcaatctatgcatgtggcaaaattacatttgtaccccat-----aaatttgta  
aaaatg-taaaaaatg--AAACTAAGTAATGTTAAA--TGGGAGTGTTCCTCAAAAAA-CGGTATTACTCTTTAGA  
AGTTACTTAAGCTGCTAAAATTATAAACCT-CTCAATGGTTCACAAAAGGGGATATTATACCTGCCATCACTAAGGC  
AT

>Bushbaby

----TGCTTCAAGTTTTTTAATTTAGTTCATTCTGAGCTCAGAGAAAAGGCAACAAGGTTAATCGCACAAATAAAAG  
TAGTGATTTTTTCTACAAATTTGGCAGTATATAGCTCCTAACCAAAACAAA-AA-TGCTAAGTAAACACA---CATAT  
TCCTGGAATCAATAAAAAGGAAGAAGTCAGACATTTTATTGTG-----  
-----  
-----AAACTAAGTAATATTTAAA---TAAGAACTTTCTCTGAAAAA-CCCTTTTAACTTTTAGA  
AATTGCCTAAGCTGCTAAAACCTATAAACCTA-TCCAATGATTCACAGAAAGGGATGTTATACTTGCTATCATTAAAGCC  
AT

>Mouse\_lemur

----TCCTTCAAGTTTTTAGAATCTAGTT-CACACTTGAGCTCAGAGTAAAGGCAACAAGAAT-ATGATGCAATGAAAG  
TAGTGATCTTTTTCTAGGAATTTTGCATATATAACTCATAACCAAAAAAAGAA-TGCTAAGTAAAAACA---CATAT  
TCCTGGAATCATAAAAAAGAGGAAGTCAGATATTTTATTG-G-----  
-----  
-----GAAACTAA---TGTTAAA---AGAGAGCTTTCTCTGAAAAA-CTCTGTTAATCTTTAGA  
ATTTACTTAAGCTGCTAAAACCTATAAACCCACCCCAATGATTCACAGAAGGGGATGTTATACTTGCTACCACTAAGCC  
AT

>Dog

ATATCTCTTCCAGTTTTTAGAATTTAATT-CATACCCAAGTTCAGAGTAAAAGCAATAAGGCTAATGATACAATAAGAG  
TAGTGACTTTTTTCTAAGAATTTGGCAA-AAATAACTCTTAACCAAAATAAA-AA-TGCTAAG-AAAAAAAAGCCATAT  
TCTTGGAACC-AAAGAAAGGAAGAAGTTAGATATGTTGTTTTG-----  
-----  
-----AAACTAAGTAAAGTTAAA---TGAGAGCTTTTTTTGAAAAA-TTCTACTAATCTTTTAGA  
AGTTACTAGAGCTAGCAAAACCATAAAAACG-CCCAATGACTCACAGAAGGGGATATTAGGCTTTCTATCATTAAACC  
AT

>Horse

ATGTTCTTTCCCG-TTTAGAATTTGGTT-CATCCCTGAGTTCAGAGTAAGGACAACAGAG-TAAGGATACAATAAGAG  
TAGTGATCTTTTTCGAAGAATTGCACAATATATAACTTCTAACTAAATAAA-AA-TGCAAGT-AAAAACA---CATAT  
TCCTGGAACC--AAAGAAGGAGGAAGTCAGATGTTTTGTTTTG-----  
-----  
-----AAACTAAGTAAAGTTAAA---TAAGAGCTTTCTCTAAAAAGTTCTCCTTATCTTT---  
AGTTACTTGAGCTAGTAAAACCACAAACACA-TCCAGTGATTCACAGAAGAGGGTCTTACACTTGCTGTCAAGCC  
GT



## Marker L96

>L1PB4\_3'-End

-----  
-----  
-----  
-----gacatacaggggtgg  
gaggggggtgagggatgagaaattacctawtgggt-----acaat-gtacctattcg  
ggtgatggktacctaaaagcccagacttcaccactacgcaatatatccatgtaacaaaactgcacttgtacccccta  
aatctataaaaaat-aaaaaaa-----  
-----

>Human

TTTCCAGGAGATGACACTGGAGCTGACTTTTGAAGATATGGT-AGGAGTTAGCTGGGGG-----  
-----AAA-AAAAAAA-----GC-----  
-----ATGATGCAT-----TTGCTGG  
AGAGGGTGATAGACA-GG-----AG-----ATAAGGCTGGGATCAGATGATGAAGGACCCGAAAACCTG  
TAAAC--TAGATAAGGCTAAATCCACATTATGACATGACTCA---T--ATGCAGCC---aacaatgggtattttgtttg  
ggtgataggtaccctaaaagcccttacat--acactatgca-----tgtaacaaaattattcttataaccata  
catttatgcaaat-aaaaaaa---TACACAAC---AGT---TCAGAAAG-----GAACTACAAAGAACATACAGGCA  
TAACT--ATAGTA-TTTGTCCTGTATTAATATCCAGTTCACCCCA-CCTTAGGAATTGGAGACCTGTCAGGTAAATG-A  
AGCTAAATAAATATCTCC--AGATTGGGGCTCCTTGGAT-CTCTCA-TTT--CTTCT-GTCATCTT-GCTTCTGCCTC  
ATCTG--CCA

>Chimp

TTTCCAGGAGATGACACTGGAGCTGACTTTTGAAGATATGGT-AGGAGTTAGCTGGGGG-----  
-----GAA-AAAAAAA-----GC-----  
-----ATGATGCAT-----TTGCTGG  
AGAGGGTGATAGACA-GG-----AG-----ATAAGGCTGGGATCAGATGATGAAAGACCCGAAAACCTG  
TAAAC--TAGATAAGGCTAAATCCACATTATGACATGACTCA---T--ATGCAGCC---aacaatgggtattttgtttg  
ggtgataggtaccctaaaagcccttacat--acgctatgca-----tgtaacaaaattattcttatgcccata  
catttatgcaaat-aaaaaaa---TACACAAC---AGT---TCAGAAAG-----TAACTACAAAGAACATACAGGCA  
TAACT--ATAGTA-TTTGTCCTGTATTAATATCCAGTTCACCCCA-CCTTAGGAATTGGAGACCTGTCAGGCAAATG-A  
AGCTAAATAAATATCTCC--AGATTGGGGCTCCTTGGAT-CTCTCA-TTT--CTTCT-GTCATCTT-GCTTCTGCCTC  
ATCTG--CCA

>Orangutan

TTTCCAGGAGATGACACTGGAGCTGACTTTTGAAGATATGGT-ATGAGTTAGCTGGGGG-AAAA-----  
-----AAAA-AAAAAAA-----GC-----  
-----ATGATGTAT-----TTGCTGG  
AGAGGGTGATAGATA-GG-----AG-----ATAAGGCTGGGATCAGATGATGAAGGACTGGCAAAAACCTG  
TAGAC--TAGATAAGGCTAAATCCACATTATGACATGACTCA---T--ATGCAGCT---aacagtggtattttgtttg  
ggtgataggtaccctaaaagcccatacat--acactatgca-----tgtaacaaaattattcttataaccata  
catttatgcaaat-aaaaaaa---TACACAAC---AGT---TCAGAAAG-----GAACTACAAAGAACATACAGGCA  
TAACTAATAGTATTTTGTCTGTATTAATATCCAGTTCACCCCA-CCTTAGGAATTGGAGACCTGTCAGGCAAATGAA  
AGCTAAATAAATATCTCCAGAAATTGGGGCTCCTTGGATCCTCTCATTTT--CTTCTGGTCATCTTGGCTTCTGCCTC  
ATCCTGCCCA

>Baboon

GTTCCAGGAGATGACACTAGAGCTGACTTTTGAAGATATGGT-ATGAGCTAGCTGGAGGAAAA-----  
-----AAAA-AAAAAAA-----GC-----  
-----ATGATACAT-----TTGCTGG  
AGAGAGTGATAGAGA-GG-----AG-----ATAAGGCTGGGATCAGATGACCAGGGACCCACAAAACCTG  
TAGAC--TAGATAAGACTGAATCCACATTATGACATGACTCA---C--AGGCAGCC---agcaatgggtattttgtttg  
ggtgataggtaccccaaaagcccttatat--acaccatgca-----tgtaacaaaattcttcttataaccata  
catttacgcaaat-aaaaaaa---TACACAAC---AGTAGTTCAGAAAG-----GAACTACAAAGAGCATACAGGCA  
TAACC--ACAGCA-TTTGTCCTGTATTAATATCCAGTTCACCCCA-CCTTAGGTATTGGAGACCTGTCAGGCAAATG-A  
AGCTAAATAAATATCTCC--AGATTGGGGCTCCTTGGAT-CTCTCA-TTT--CTTCT-GTCATCTT-GCTTCTGCCAC  
ATCTG--CCA

>Rhesus

```
GTTCCAGGAGATGACACTAGAGCTGACTTTTTGAAGATATGGT-ATGAGCTAGCTGGAGG-AAAA-----  
-----AAAA-AAAAAAA-----GC-----  
-----ATGATACAT-----TTGCTGG  
AGAGAGTGACAGAGA-GG-----AG-----ATAAGGCTGGGATCAGATGACGAGGGACCCACAAAACCTG  
TAGAC--TAGATAAGACTGAATCCACATTATGACATGACTCA---C--AGGCAGCC--agcaatggtatthttg  
ggtgataggtacccccaaaagcccttatat--acactatgca-----tghtaacaataattcttcttataccccata  
catttacgcaaat---aaaaa---TACACAAC---AGTAGTTCAGAAAAG-----GAACTACAAAAGAGCATAACAGGCA  
TAACT--ACAGCA-TTTGTCCTGTATT-ACATCCAGTTCACCCCA-CCTTAGGTATTGGAGACCTGTGAGGCAAAATG-A  
AACTAAATAAATATCTCC--AGATTGGGGCTCCTTGGAT-CTCTCA-TTT--CTTCT-GTCATCTT-GCTTCTGCCAC  
ATCTG--CCA
```

>Marmoset

```
TTTCCAGGAGATGACACCGGAACTGACTTTTTGAAGATATGAT-ATGAGTTAGCTGAGGG-----  
-----GAA-AAAAACA-----GC-----  
-----CCGATGCAT-----TTTCTGG  
AGAGGGTGATAGAAA-GG-----AG-----ATAAGGCTGGTATCAGAAGACGAAGGAGCCGAAAACCTA  
TAGAC--TAGACAAGGCTAAATCCACCTTATGACATGATTCA---T--ATGCAGTT--gaacaacggtactttatctg  
ggtgatgggtgtcctaaaagcc-----cactatgca-----tghtaacaataattattcttata-cccata  
catttatgcaaat--aaacaa---CAAAGAAC---AGT---TCAGAAAAG-----GAACTACAAAAGAACATACAGGCC  
TAACT--ACAGTA-TTTGTCCTGCATTAATATCCAGTTCACCCCA-CCGTAAGAATTGAAAATCTGTGAGGAAAAGG-A  
TGCTAAATAAATATCTCG--AGACTGAAGCTCCTTGAAT-CTCTCA-CTT--CTTCT-GTCATCTT-GCTTCTGCCTC  
GACGG--CCA
```

>Tarsier

```
TTTCCAGGAGATGACACTGGAGCTGACTTTTTGAAGCTATGGT-ATGTGTTAGCTGGGCA-----  
-----AAC-CAACAAA-----GC-----  
-----AC-----GG  
AGAGGGTGATAGAAA-GG-----AGTAGAGTAAGCCAGGGATCAGATCACGGAGGACCAGCAAAATGGA  
TGGAT--TGGACAAGGCTGAATTCACACAGTCACATGAATCA---T--ATGCAGTC--tacagtg--tacaatata  
ggtgataggtaccctaaaagccctgacttcaccactatgcaatgtatgcttghtaacaataattactcttgtacccata  
catttatacagatttagaaaa---TACGAAAC---AGT---T---AAAA-----TAATTATAAGGAACATGCAGGCA  
TAAAC--ATAGCA-TTTGTCCTATATTAATATCCAGTTCCTACT-TCTTAGAAAATTGGGGACCTATTAACCCAATG-A  
AGCTAAATAAACATTGAC--AGGC-AGAGCTCTTTGGAT-CCCCTT-TCT--CTTGA-GTCATCTT-TCTTCTCCATC  
ATCTG--CCA
```

>Bushbaby

```
TTTCCAGGAGATGACACTGGAGCTGACTTCTGAATATATGGC-ATGAGTTATCT-GGCC-AAAA-----  
-----AAAA-AAGAAA-----GAAAGAAAAGG  
GTGGGGAGAGACATCTAAAA-TCAAAAAGCATG---ATGATGCAT-----TT-----  
---GGTGATAAAGA-GAGAGAAGA-----AAG---ATACATCTGAGATCAGATCATAAAGGACCAGCAAAA--GG  
TGGACAAGGGTCAAGGCTGAGTCCACATCGTGACAGGAAACA--A--GCACAGTC-----  
-----TACGGAAC---AGT---TCAGGAAGCTCCTGAACTGCAAAGAGCCTCTGGGTA  
TAACC--ACAGGA-CTTGCCCTATGTTAATACCCAATTCCTCCT-CCTTAAGAATTGGGGACCTGTGAGCCAGATG-A  
AGCTAAATAAACATCTCC--AGACTGAGAGTGCTTGGAT-CCCTTT-TTT--CTCGT-GTCATCCATGCTTCCCCACC  
ATCTG--TCA
```

>Mouse\_lemur

```
TTTCCAGCAGATGACACTGGAGCTGACTTTTTGAAGATATGGT-ATGAGTTAGCTGGGCT-AAAA-----  
-----AAAA-AAGAAA-----AA-----  
-----GTGGGACATCCAAAAGTTAAAAAGCATAAAGCATGATGCAT-----TTGCTGA  
ACAGGATGATAAAGA-CAGAG-----AG-----ATAAGCCTGAGATCAGATCATAAAGGACAAGCAAGACGGA  
TGGAC--TGGACAAGGCTGAATCCACATTGTGACATGAAACA---T--GTGCTGTC-----  
-----TACAGAGC---AGT---TCAGAAAAG-----GAACTACAAAAGACATGCAGATA  
TAACT--ATAGCA-TTTATCCTATGTTAATGTCCAGCTCCTCCT-CCTCAGGAATTGGGGACCTGTGAGCCAGATG-A  
AGCAAAATAAATATTTCC--AG---GGATCTCTTTGGAT-TCCTTT-TTT--CTTGT-GTCATCTA-GCTTCCCCATG  
ATCTG--CCA
```

>Guinea\_pig

```
TGTTTCAGAAGATGGTGTCTTGATCTGATTTGTAAGGATATAGT-ATGAGTTAGCTGAGCC-AAAA-----T
AAATAA---AGATATA-----GG-----CGTCCAAAAG-TGGAAAACATGAG-----
-----GTTTAGGAG-----AACTGCATAAAGTTTCATTGTAGCCAG
AGAGAGTGATAATGCTGG-----AG-----AAGAGGCTGGGATCAGGCACAACAGA-ATAGCAAAATGGG
TGGA--TGGA-----TCTCTCTCATGTGAATGTGCATGG--T--GACTTGAA-----
-----TCCTCTGA---CAT---CTGCACAA-----TGGGTAAGAAAAGTAATCAAAAAC
AC-CA--AAC-TA-TTTGTCCTGTGTTAATATATAATTGCTCCT-CCTTAGGAAAATGGATCT-GTTAGCCAAATG-G
AGCTCAGTAAATATCGTC--ACATGAGGGCCTTTTGGAT-CCCTC--TTT--GACCT-GTCATCC-----
-----
```

>Dog

```
TTTTTCAGGAGATAGCACTGGAGCCGACTTTTCGAAGATACAAGTATGAGTTAAGTGGGCC-AAGAAATGAAATGAAATG
AAATGAAATGAGATGAAATAAAAACAAAGCAAGAAGGCAGAACCCACTTTAAAG-TTAGAAA---GT-----
-----ATGATACATTTGGGAACCTGCATATAGTTTGGGATTGTTGG
AGAGGGTG----ACA-GAGAGATAAGCCTAGAGC----AGTAGACTGGGATCAAATCATGGA-AATCAACAAAACGAA
TGGAT--TGAAGTAGGCTGAGTCCACACTGACATGATCATT--TAGAAACAGGC-----
-----TACAAAAC---ACT---TTGAAAT-----GACCTACAGACAACATACATACT
TAACT--ACAGCA-TTTATCCAGTATTCAAATCCAATTCCTTCT-CT-TAAGTACTGAGGTCTATCTGCCAAATG-A
GTCTAAATAAATATCTCT--ACACAGGAACCTTTGGAT-CTTTA-TTTT--CTTTT-GTCATCCT-GCTTCTCCATC
GTCTG--CCA
```

>Horse

```
TTTTTCAGGAGACAACACTGGAGCTGGCCTTTGAAGATATAGT-ATGAGTTAGCTGGATC-ATAAAA-----
-----GGATAA-----GG-----ACACCCAAAACCTTAGAAA---GC-----
-----CTGATGCATTTGAGGAACTGCATATAGTTTCAGGATGGCTGG
AGGGGGTGATGAAGA-GTGAGGTGAGCCTGGAGA----AGCAGACTGGGAGCAGATTATGAAGGATCAGCAAAAGGAC
TGGCT--TGAACAAGGCTGAATCCACATTGTGACGTAAATCA--T--AGGCAGGC-----
-----TACAAAAC---ACT---TTAGAAAC-----AACTGCAAACAACATATGGGTC
TAACT--ACAGCA-TTTGTCCTGTGTTAATATCCAGTTCCTTCT-CCATAGGAACTGGGGACCTGTGAGCCAGATT-A
AACTAAATAAATATCTCC--TTGTAGAGACTCTTTGGAT-CCCTG-TTTTTCTTTT-ATCATCCT-GCTTCTCGATC
ATCTG--CCA
```

Marker L99

>L1PB4\_3'-End

-----  
-----  
-----  
-----gacatacaggggtgg  
gaggggggtgagggatgagaaattacctawtgggt-----acaat-gtacctattcg  
ggtgatggktacctaaaagcccagacttcaccactacgcaatatatccatgtaacaaaactgcacttgtacccccta  
aatctataaaaaat-----aaaaaaa-----  
-----  
-----

>Human

TTTCCAGGAGATGACACTGGAGCTGACTTTTGAAGATATGGT-AGGAGTTAGCTGGGGG-----  
-----AAA-AAAAAAA-----GC-----  
-----ATGATGCAT-----TTGCTGG  
AGAGGGTGATAGACA-GG-----AG-----ATAAGGCTGGGATCAGATGATGAAGGACCCGAAAACCTG  
TAAAC--TAGATAAGGCTAAATCCACATTATGACATGACTCA---T--ATGCAGCC---aacaatgggtattttgtttg  
ggtgataggtaccctaaaagcccttacat--acactatgca-----tgtaacaaaattattcttatacccata  
catttatgcaaat-----aaaaaa---TACACAAC---AGT---TCAGAAAG-----GAACTACAAAGAACATACAGGCA  
TAACT--ATAGTA-TTTGTCCTGTATTAATATCCAGTTCACCCCA-CCTTAGGAATTGGAGACCTGTCAGGTAAATG-A  
AGCTAAATAAATATCTCC--AGATTGGGGCTCCTTGGAT-CTCTCA-TTT--CTTCT-GTCATCTT-GCTTCTGCCTC  
ATCTG--CCA

>Chimp

TTTCCAGGAGATGACACTGGAGCTGACTTTTGAAGATATGGT-AGGAGTTAGCTGGGGG-----  
-----GAA-AAAAAAA-----GC-----  
-----ATGATGCAT-----TTGCTGG  
AGAGGGTGATAGACA-GG-----AG-----ATAAGGCTGGGATCAGATGATGAAAGACCCGAAAACCTG  
TAAAC--TAGATAAGGCTAAATCCACATTATGACATGACTCA---T--ATGCAGCC---aacaatgggtattttgtttg  
ggtgataggtaccctaaaagcccttacat--acgctatgca-----tgtaacaaaattattcttatgcccata  
catttatgcaaat-----aaaaaa---TACACAAC---AGT---TCAGAAAG-----TAACTACAAAGAACATACAGGCA  
TAACT--ATAGTA-TTTGTCCTGTATTAATATCCAGTTCACCCCA-CCTTAGGAATTGGAGACCTGTCAGGCAAATG-A  
AGCTAAATAAATATCTCC--AGATTGGGGCTCCTTGGAT-CTCTCA-TTT--CTTCT-GTCATCTT-GCTTCTGCCTC  
ATCTG--CCA

>Orangutan

TTTCCAGGAGATGACACTGGAGCTGACTTTTGAAGATATGGT-ATGAGTTAGCTGGGGG-AAAA-----  
-----AAAA-AAAAAAA-----GC-----  
-----ATGATGTAT-----TTGCTGG  
AGAGGGTGATAGATA-GG-----AG-----ATAAGGCTGGGATCAGATGATGAAGGACTGGCAAAAACCTG  
TAGAC--TAGATAAGGCTAAATCCACATTATGACATGACTCA---T--ATGCAGCT---aacagtggtattttgtttg  
ggtgataggtaccctaaaagcccatacat--acactatgca-----tgtaacaaaattattcttatacccata  
catttatgcaaat-----aaaaaa---TACACAAC---AGT---TCAGAAAG-----GAACTACAAAGAACATACAGGCA  
TAACTAATAGTATTTTGTCTGTATTAATATCCAGTTCACCCCA-CCTTAGGAATTGGAGACCTGTCAGGCAAATGAA  
AGCTAAATAAATATCTCCAGAAATTGGGGCTCCTTGGATCCTCTCATTTT--CTTCTGGTCATCTTGGCTTCTGCCTC  
ATCCTGCCCA

>Baboon

GTTCCAGGAGATGACACTAGAGCTGACTTTTGAAGATATGGT-ATGAGCTAGCTGGAGGAAAA-----  
-----AAAA-AAAAAAA-----GC-----  
-----ATGATACAT-----TTGCTGG  
AGAGAGTGATAGAGA-GG-----AG-----ATAAGGCTGGGATCAGATGACCAGGGACCCACAAAACCTG  
TAGAC--TAGATAAGACTGAATCCACATTATGACATGACTCA---C--AGGCAGCC---agcaatgggtattttgtttg  
ggtgataggtaccccaaaagcccttatat--acaccatgca-----tgtaacaaaattcttcttatacccata  
catttacgcaaat-----aaaaaa---TACACAAC---AGTAGTTCAGAAAG-----GAACTACAAAGAGCATACAGGCA  
TAACC--ACAGCA-TTTGTCCTGTATTAATATCCAGTTCACCCCA-CCTTAGGTATTGGAGACCTGTCAGGCAAATG-A  
AGCTAAATAAATATCTCC--AGATTGGGGCTCCTTGGAT-CTCTCA-TTT--CTTCT-GTCATCTT-GCTTCTGCCAC  
ATCTG--CCA

>Rhesus

GTTCCAGGAGATGACACTAGAGCTGACTTTTTGAAGATATGGT-ATGAGCTAGCTGGAGG-AAAA-----  
-----AAAA-AAAAAAA-----GC-----  
-----ATGATACAT-----TTGCTGG  
AGAGAGTGACAGAGA-GG-----AG-----ATAAGGCTGGGATCAGATGACGAGGGACCCACAAAACCTG  
TAGAC--TAGATAAGACTGAATCCACATTATGACATGACTCA---C--AGGCAGCC--agcaatggtatthttg  
ggtgataggtacccccaaaagcccttatat--acactatgca-----tghtaacaataattcttcttataccccata  
catttacgcaaat---aaaaa---TACACAAC---AGTAGTTCAGAAAAG-----GAACTACAAAAGAGCATAACAGGCA  
TAACT--ACAGCA-TTTGTCCTGTATT-ACATCCAGTTCACCCCA-CCTTAGGTATTGGAGACCTGTGAGGCAAAATG-A  
AACTAAATAAATATCTCC--AGATTGGGGCTCCTTGGAT-CTCTCA-TTT--CTTCT-GTCATCTT-GCTTCTGCCAC  
ATCTG--CCA

>Marmoset

TTTCCAGGAGATGACACCGGAACTGACTTTTTGAAGATATGAT-ATGAGTTAGCTGAGGG-----  
-----GAA-AAAAACA-----GC-----  
-----CCGATGCAT-----TTTCTGG  
AGAGGGTGATAGAAA-GG-----AG-----ATAAGGCTGGTATCAGAAGACGAAGGAGCCGAAAACCTA  
TAGAC--TAGACAAGGCTAAATCCACCTTATGACATGATTCA---T--ATGCAGTT--gaacaacggtactttatctg  
ggtgatgggtgtcctaaaagcc-----cactatgca-----tghtaacaataattattcttata-cccata  
catttatgcaaat--aaacaa---CAAAGAAC---AGT---TCAGAAAAG-----GAACTACAAAAGAACATACAGGCC  
TAACT--ACAGTA-TTTGTCCTGCATTAATATCCAGTTCACCCCA-CCGTAAGAATTGAAAATCTGTGAGGAAAAGG-A  
TGCTAAATAAATATCTCG--AGACTGAAGCTCCTTGAAT-CTCTCA-CTT--CTTCT-GTCATCTT-GCTTCTGCCTC  
GACGG--CCA

>Tarsier

TTTCCAGGAGATGACACTGGAGCTGACTTTTTGAAGCTATGGT-ATGTGTTAGCTGGGCA-----  
-----AAC-CAACAAA-----GC-----  
-----AC-----GG  
AGAGGGTGATAGAAA-GG-----AGTAGAGTAAGCCAGGGATCAGATCACGGAGGACCAGCAAAATGGA  
TGGAT--TGGACAAGGCTGAATTCACACAGTCACATGAATCA---T--ATGCAGTC--tacagtg--tacaatata  
ggtgataggtaccctaaaagccctgacttcaccactatgcaatgtatgcttghtaacaataattactcttgtacccccata  
catttatacagatttagaaaa---TACGAAAC---AGT---T---AAAA-----TAATTATAAGGAACATGCAGGCA  
TAAAC--ATAGCA-TTTGTCCTATATTAATATCCAGTTCCTACT-TCTTAGAAAATTGGGGACCTATTAACCCAATG-A  
AGCTAAATAAACATTGAC--AGGC-AGAGCTCTTTGGAT-CCCCTT-TCT--CTTGA-GTCATCTT-TCTTCTCCATC  
ATCTG--CCA

>Bushbaby

TTTCCAGGAGATGACACTGGAGCTGACTTCTGAATATATGGC-ATGAGTTATCT-GGCC-AAAA-----  
-----AAAA-AAGAAA-----GAAAGAAAAGG  
GTGGGGAGAGACATCTAAAA-TCAAAAAGCATG---ATGATGCAT-----TT-----  
----GGTGATAAAGA-GAGAGAAGA-----AAG----ATACATCTGAGATCAGATCATAAAGGACCAGCAAAA--GG  
TGGACAAGGGTCAAGGCTGAGTCCACATCGTGACAGGAAACA--A--GCACAGTC-----  
-----TACGGAAC---AGT---TCAGGAAGCTCCTGAACTGCAAAGAGCCTCTGGGTA  
TAACC--ACAGGA-CTTGCCCTATGTTAATACCCAATTCTCCT-CCTTAAGAATTGGGGACCTGTGAGCCAGATG-A  
AGCTAAATAAACATCTCC--AGACTGAGAGTGCTTGGAT-CCCTTT-TTT--CTCGT-GTCATCCATGCTTCCCCACC  
ATCTG--TCA

>Mouse\_lemur

TTTCCAGCAGATGACACTGGAGCTGACTTTTTGAAGATATGGT-ATGAGTTAGCTGGGCT-AAAA-----  
-----AAAA-AAGAAA-----AA-----  
-----GTGGGACATCCAAAAGTTAAAAAGCATAAAGCATGATGCAT-----TTGCTGA  
ACAGGATGATAAAGA-CAGAG-----AG-----ATAAGCCTGAGATCAGATCATAAAGGACAAGCAAGACGGA  
TGGAC--TGGACAAGGCTGAATCCACATTGTGACATGAAACA---T--GTGCTGTC-----  
-----TACAGAGC---AGT---TCAGAAAAG-----GAACTACAAAAGACATGCAGATA  
TAACT--ATAGCA-TTTATCCTATGTTAATGTCCAGCTCCTCCT-CCTCAGGAATTGGGGACCTGTGAGCCAGATG-A  
AGCAAAATAAATATTTCC--AG--GGATCTCTTTGGAT-TCCTTT-TTT--CTTGT-GTCATCTA-GCTTCCCCATG  
ATCTG--CCA

>Guinea\_pig

```
TGTTTCAGAAGATGGTGTCTTGATCTGATTTGTAAGGATATAGT-ATGAGTTAGCTGAGCC-AAAA-----T
AAATAA--AGATATA-----GG-----CGTCCAAAAG-TGGAAAACATGAG-----
-----GTTTAGGAG-----AACTGCATAAAGTTTCATTGTAGCCAG
AGAGAGTGATAATGCTGG-----AG-----AAGAGGCTGGGATCAGGCACAACAGA-ATAGCAAAATGGG
TGGA--TGGA-----TCTCTCTCATGTGAATGTGCATGG--T--GACTTGAA-----
-----TCCTCTGA--CAT--CTGCACAA-----TGGGTAAGAAAAGTAATCAAAAAC
AC-CA--AAC-TA-TTTGTCCTGTGTTAATATATAATTGCTCCT-CCTTAGGAAAATGGATCT-GTTAGCCAAATG-G
AGCTCAGTAAATATCGTC--ACATGAGGGCCTTTTGGAT-CCCTC--TTT--GACCT-GTCATCC-----
-----
```

>Dog

```
TTTTTCAGGAGATAGCACTGGAGCCGACTTTTCGAAGATACAAGTATGAGTTAAGTGGGCC-AAGAAATGAAATGAAATG
AAATGAAATGAGATGAAATAAAAACAAAGCAAGAAGGCAGAACCACCTTTAAAG-TTAGAAA--GT-----
-----ATGATACATTTGGGAACCTGCATATAGTTTGGGATTGTTGG
AGAGGGTG---ACA-GAGAGATAAGCCTAGAGC---AGTAGACTGGGATCAAATCATGGA-AATCAACAAAACGAA
TGGAT--TGAAGTAGGCTGAGTCCACACTGACATGATCATT--TAGAAACAGGC-----
-----TACAAAAC--ACT--TTGAAAT-----GACCTACAGACAACATACATACT
TAACT--ACAGCA-TTTATCCAGTATTCAAATCCAATTCCTTCT-CT-TAAGTACTGAGGTCCTATCTGCCAAATG-A
GTCTAAATAAATATCTCT--ACACAGGAACCTTTTGGAT-CTTTA-TTTT--CTTTT-GTCATCCT-GCTTCTCCATC
GTCTG--CCA
```

>Horse

```
TTTTTCAGGAGACAACACTGGAGCTGGCCTTTGAAGATATAGT-ATGAGTTAGCTGGATC-ATAAAA-----
-----GGATAA-----GG-----ACACCCAAAACCTTAGAAA--GC-----
-----CTGATGCATTTGAGGAACTGCATATAGTTTCCAGGATGGCTGG
AGGGGGTGATGAAGA-GTGAGGTGAGCCTGGAGA---AGCAGACTGGGAGCAGATTATGAAGGATCAGCAAAAGGAC
TGGCT--TGAACAAGGCTGAATCCACATTGTGACGTAAATCA--T--AGGCAGGC-----
-----TACAAAAC--ACT--TTAGAAAC-----AACTGCAAAACAACATATGGGTC
TAACT--ACAGCA-TTTGTCCTGTGTTAATATCCAGTTCCTTCT-CCATAGGAACTGGGGACCTGTCAGCCAGATT-A
AACTAAATAAATATCTCC--TTGTAGAGACTCTTTGGAT-CCCTG-TTTTTCTTTT-ATCATCCT-GCTTCTCGATC
ATCTG--CCA
```

## Marker L101

>L1PB4\_3'-End

```
ACACTGTTGGTGGGAATGTAAATTAGTACAACCTCTATGGAAAACAGTAT-----  
-----ggagattttctcaagaactaaaaatagaactaccattcgatccagcaat  
cccactactgggtatctacccaaaggaaaagaaatcattatatcaaaaa-gatacctgcactcgtatgtttatcgcag  
cactattcacaatagcaaaagatatggaatcaacctaagtgtccatcaatggatgactggataaagaaaaatgtg-----  
-----  
--tatatatacacca----tggaaactactcagccataaaaaagaatgaaatcatgtcttttgcagcaacatggatg  
gaactggaggccattatcctaagtgaataactcagaaacagaaagtcaaataccgcatgttctcacttataagtggg  
agctaaacaatgkgtacacatggacatacagagtggaaatagacactggagactcmgaaagggtggggagg--gtggg  
aggggggtgagggatgagaaattacctaawtgggtacaatgtacactattcgggtgatggktacactaaaagcccagac  
ttcaccactacgcaatataatccatgtaacaaaactgcacttgtaccccctaataatctataaaaaataaaaaa-----  
-----
```

>Human

```
TTGGATCCATCTCAGACTAATTAATCAGAACCCATGGGGATGAGGCCAGACATGAGTGGGTTTTTTTGTCTTTTTT  
A-----AAAAAAGCTCCCT-----aggagattttctcaagaactgaaaatagaactaccatgatccagcaat  
cccacttttgggtatctacccaaaggaagataaattattatataaaaaa-gatacctgcactcaaataattattgcaa  
cactatccacagtagcaaaaaatggaatcaacctaactgtccatccatggatgactggataaagaaaaatgtg-----  
-----  
--tatatatacacacacaatggaatactattcattcgtaaaaaagaacaaagtc-tgtcttttgcagcaaatatggaag  
gaactggaagccattctcttaagtgaagcaactcagaaacagaaaggcaaattccacatgttctcacttacaattggg  
agctaaataatgcatatgcatgggacagagtggtggaataatagacattggagactcggaaagggtggggggg-aatggg  
agaggg-tcaatgatgaaaaattacttaatgagtacaacgtacattatttgggtgatgaatacactaaaagcccacac  
tttaccactatgcaatatggccatgtaacaaaattgcccttacacccttaaatttatacaaaataaaaaataaaaa-  
-----t---AAAAGCTCCTTA---GGGCTGAGAACTACTGCTCCTGTCTATGGGTCCCAGCTTTATTT
```

>Chimp

```
TTGGATCCATCTCAGACTAATTAATCAGAACCCATGGGGATGAGGCCAGACATGAGTGGGTTTTTTTCTTTTTT  
T-----AAAAAAGCTCCCT-----aggagattttctcaagaactgaaaatagaactaccatgatccagcaat  
cccacttttgggtatgtacccaaaggaagataaattattatataaaaaa-gatacctgcactcaaataattattgcaa  
cactatccacagtagcaaaaaatggaatcaacctaactgtccatccatggatgactggataaagaaaaatgtg-----  
-----  
--tatatatacacacacaatggaatactattcattcataaaaaagaacaaagtc-tgtcttttgcagcaaatatggatg  
gaactggaagccattctcttaagtgaagcaactcagaaacagaaaggcaaattccgcatgttctcacttacaattagg  
agctaaataatgcatatgcatggacacagagtggtggaataatagacattggagactcggaaagggtggggggg-aatggg  
agaggg-tcaatgatgaaaaattacttaatgagtacaatgtacattatttgggtgatgaatacactaaaagcccacac  
tttaccactatgcaatatggccatgtaacaaaattgcccttacacccttaaatttatacaaaataaaaaataaaaa-  
-----t---AAAAGCTCCTTA---GGGCTGAGAATTACTGCTCCTATCCTATGGGTCCCAGCTTTATTT
```

>Orangutan

```
TTGATACATCTCAGACTAATTAATCAGAACCCATGGGGATGAGGCCAGACATGAGTGGGTTTTTTTCTTTTTT  
T-----AAAAAAGCTCCCT-----aggagattttctcaagaactgaaaatagaactaccatgatccagcaat  
cccacttttgggtatctacccaaaggaagatacattattatataaaaaa-gatacctgcactcaaataattattgcaa  
cactatccacagtagcaaaagatatggaatcaacctaactgtctatccatgaatgactggataaagaaaaatgtg-----  
-----  
--tatatatacacacacaatggaatactattcatccataaaaaagaacgaagtc-tgtcttttgcagcaaatatggatg  
gaactggaagccattctcttaagtgaagcaactcagaaacagaaaggcaaattccacatgttctcacttacaattagg  
agctaaataatgtatgcatggacacacagtggtggaatgatagacattggagactcggaaagggtggggggg-aatggg  
agatgg-tcaatgatgaaaaattacttaatgagtacaatgtacattatttgggtgatgaatacactaaaagcccacac  
tttaccactatgcaatatggccatgtaacaaaattgcccttacacccttaaattgatacaaaataaaaaa-aaataaa-  
-----t---AAAAGCTCCTCA---GGGCTGAGAACTACTGTTCTCTATCCTATGGGTCCCAGCTTTATTT
```

>Baboon

```
TTGGATTCAATTTAGACAAATTAATCAGAACCCATGGGGATGAGGCCAGACATGAGTGGGTTTTTTTCTTTTTT  
TTTTTA---AAAAAAGCTCCCT-----aggagattttatcaagaactggaaatagaactaccatgatccagcaat  
cccacttttgggtatctacccaaaggaagagaaattattacatagaaaaagatacctgcactcgaatgtttattgca  
cactattcacagtagcaaaagatacggaaatcaacctaactgtccatccatggatgactggataaagaaaaatgtg-----  
-----  
--tatacatatacacacacaatggaatactattcatccataaaaaagagtgaggtc-tgtcttttgcagcaaatatgggtg
```

aaactggaagccattctcttaaatgaagcaactcagaaatagaaaggcaaattccacatgttctcattttataattggg  
agctaaatcatgtgtatgcatgaacacagagtggtggaatgatagacattg-agacttgaaagggcgggggcaatggg  
agagca-tcaatgatgaaaaattacttaatgagtacaatgtacggtatttgggtgatgaatacactaaaagtcacac  
tttaccactatgcaatatggccatgtaacaaaattgccctcacatcccttaaatttatacaaaataaaaa--aataa--  
-----t---AAAAGCTCCTTA---GGGCTGAGAACTACTGCTCCTATCCTATGGGCCCTTGCTTTATTT

>Rhesus

TTGGATTCATTTAGACAAATTAATCAGAACCCATGGGGATGAGGCCAGACATGAGTGGGTTTTTTTTCTTTTTT  
TTT--A---AAAAAAGCTCCTT-----aggagatttctcaagaactggaatagaactaccatgatccagcaat  
cccacttttgggtatctacccaaaggaagagaaattattacataaaaaaagatacctgcactcgaatgtttattgcag  
cactattcacagtagcaaaagatcgggaatcaacctaacctgtccatccgtggatgactggataaagaaaatgtg-----

-----  
--tatacatcacacacaatggaatactcttcatccataaaaaacaatggagtc-tgtcttttgagcaatacgggtg  
aaactggaagccattctctcaaatgaagcaactcagaaatagaaaggcaaattccacatgttctcattttataattggg  
agctaaatcatgtgtatgcatgaacacagagtggtggaatgatagacattg-agacttgaaagggcgggggcaatggg  
agagcg-tcaatgatgaaaaattacttaatgagtacaatgtacggtatttgggtgatgaatacactaaaagtcacac  
tttatacactatgcaatatggccatgtaacaaaattgccctcacatcccttaaatttatacaaaataaaaa--aataa--  
-----t---AAAAGCTCCTTA---GGGCTGAGAACTACTGCTCCTATCCTATGGGCCCTTGGCTT

>Marmoset

GTGGATCCGTCTCAGACTAATTAATCAGAACCCATGGGGATGAGGCCCTAGACATGAGTGGGGTTTTTT---TTCTCT  
A----A---AAAAAATCCTT-----aggagatttctcaagaactaaaaataaaaccacatgtgatctagcaat  
ccccattttgggtatctacccaaaggaagataaattattatataaaaaaagaaacctacactcaaatgtttattgcaa  
cacaattcatagtagcaaaagatagaaatcaacctaacctggtccatccatggatgattggataaagaaaatgtgatcat  
gtgacatagtgtatatacatgtcacgtgtatatacatatgtatataatgtatatactcacatgtgtgtgta  
tctatataatacacacagatggaatactgttcatccataaaaaagaatgaatttgtgtctttcgcagcaaatatggatg  
gaactggaagccattttcttaagtgaagcaactcagaaacaaaaaggcaaattccacatgttctcacttataattagg  
agctaaataatgtgtatgcatggatcggagtggtgaaatgatagacattagagact-ggaagagttggggg-aatggg  
agggag-tcagtgtgaaaaattacttaatgactacaatgtacattattttgatgataaatacactaaaagctgatac  
ttcaccac-atgcaatatggccatgtaacaaaagttgcctttgcacccttaaatttatacaaaataaaagcaataaat  
aaaaac---AAAAGCTCCATA---GGGCTGAGAACTACTGCTCCTATCCTGTGGATTCCCTGCTTTATTT

>Tarsier

TCAGATCCATC-CAGACAAGTTAAATCTGAACCTATGGGAA-AAGATCTAGACATCAGTGTGTTTTTT-----  
-----AAA--AAGTTTCCT-----aggagatttctgaaaaattacaaatagaactaccat--gatccaacagt  
ttcactcctggatctacccagagaaaaagaaatcattttatcaaaaa-gatacctgcactggatgtttattgcag  
cactatttgtgccagcaaaagtcatggaatcaaccaaaagtattcatcaactgatgactggataaagaaaacgtg-----

-----  
-----gtctgtgtacacaatggaatactacacagccataaaaaatgaatgaactcacatcttttgagcaaacgtggatg  
aaactggaggcaattatcctgagtgaaaacactctgacatagaaagtcaaataccacatgtcctaccttcatgtggg  
cgctaaacaatgtggacacatggacatagagtgacagaataatagacactggagacttggaggctaggag--agtgag  
aggggg-tgagggaggagaatthagctaatgggtacaatgtacggtatttgggtggtggttacgctaggagccagac  
ttgaccactgcacgatatacctatgtgccccaaaccggtcttctgtactccttacatttatacaaaatacaaa--aataa--  
-----t---AAATGCTCCCTA---GACTTGAGAACCCTGCTC-TATCCTATGAGACCTCTGCTTTATTTG

>Bushbaby

CCAGATCCATCCCAAATTAATTAATCAGAACCCATGAAGATGAGGCCAGATATCAGTA---TTTTT-----

-----AAAAGCTCCCTA---AGGTTGAGAACTACTGCTC-TATCCTTTGAGAGCCCTCCCTCATTG

>Mouse\_lemur

CCAGATCCATCCAGGTTAATGAAATCAGAACCCATGAAAATGAGGCCAGACATCAGTA---TTTTT-----





## Marker L106

>L1PB4\_3'-End

```
-----aatgaaatcatgtccttttg  
cagcaacatggatgg-----  
-aactggaggccattatcctaagtgaaatagacatacagagtggaataatagacactggagactcmgaaaggtgg---  
-----gaggggtgggagggggggtgagggatgagaaattacctawtgggtacaatgtacactattcgggtgatggkta  
cactaaaagcccagacttcaccactacgcaatatatccatgtaacaaaactgcacttgtaccccctaaatctataaaa  
ataaaaaaa-----  
-----
```

>Human

```
GTTTTCTAATTTTTAAGAGGAGGTCAATTATACCTACCAACAAGGTAGTTATCAACAAGTTGTAGGGTTACAT-GAACA  
AGAATTATTAAGCAAGTTTTGGAAATGTG-AAAAGATCCTAGGTGCTTAATGAACTTT--AAAAAATACACTTAT--  
-aaatggaagctaaataa-tgtgtactcatggac-acagcatagaataagagacgctggagactcagaaggctgt---  
-----gggggggtgaggaggttgagggg-tgagaaattatgtaatgagtacaatgtacactatttgggtaatggcta  
cactaaaagctcagacttcaccactgtgcaatatatccatgtatcaaaaactgcgcttgta-cccctaaatgtatacaa  
ataaaataaattaataaat---TAAACAAGTAAGA---GAA-TGCTTACATTTTTCTTAAGCATTTTATTTAGAAGCA  
TG---TAT---CATGCAAATACACAAAAGAAATTTATTTTCAGAGCCT--GTTT---ATCTTTTAAAAGTACAC-T  
TTTTGTTTT-----C--ACTGTAAGGAGAC----GATTGAACATGCTCCATTCTTATCATCAATGCAGG
```

>Chimp

```
GTTTTCTAATTTTTAAGAGGAGGTCAATTATACCTACTAACAAGGTAGTTATCAACAATTTGTAGGGTTACAT-GAACA  
AAAGTTATTAAGCAAGTTTTGGAAATGTG-AAAAGATCCTAGGTACTTAATGAACTTT--AAAAAATACACTTAT--  
-aaatggaagctaaataa-tgtgtacttatggac-acagcatagaataagagatgctggagactcagaaggctgt---  
-----gggggggtgaggaggttgagcgg-tgagaaattatgtaatgagtacaatgtacactatttgggtaatgggta  
cactaaaagctcagactttaccactgtacaatatatccatgtatcaaaaactgcacttgta-cccc--aatgtatacaa  
ataaaataaattaataaat---TAAACAAGTAAGA---GAA-TGCTTACATTTTTCTTAAGCATTTTATTTAGAAGCA  
TG---TAT---CAAGCAAATACACAAAAGAAATTTATTTTCAGAGCCT--AATT---ATCTTTTAAAAGTACAC-T  
TTTTGTTTT-----C--ACTATAAGGAGAC----TATTGAACATGCTCCATTCTTATCA---ATGCAGG
```

>Orangutan

```
GTTTTCTAATTTTTAAGAGGAGGTCAATTATACCTACCAACAAGGTAGTTATCAACAAGTTGTAGGGTTACAT-GAACA  
AGACTTGTTAAGCAAGTTTTGGAAATGTG-AAAAGATCCTAGGTACTTAATGAACTTT--AAAAAATACACTTAT--  
-aaatggaagctaaataa-tgtatactcatggac-acagcatagaataagagacgctggagactcagaaggctgt---  
-----gggggggtgaggaggttgagggg-tgagaaattatgtaatgagtacaatgtacactatttaggtaatgggta  
cactaaaagctcagacttcaccactgccaatatatccatgtatcaaaaactgcgcttata-cccctaagtgtatacaa  
ataaaataaattaataaat---TAAACAAGTAAGA---GAA-TGCTTACGTGTTTCTTAAGCATTTTATTTAGAAGCA  
TG---TAT---CAAGAAAATACGCAAAGAAATTTATTTTCAGAGCCT--ATTT---ATCTTTTAAAAGTACAC-T  
TTTTGCTTT-----C--ACTATAAGGAGAC----GATTGAACATGCTCCATTCTTATCATCAATGCAGG
```

>Baboon

```
GTTTTCTAATTTTTAAGAGGAGATCAATTATACCTACCAACAAGGCAGTGATCAACAAGTTGTAGGGTTACAT-GAACA  
AGAGTTATTAAGCAAGTTTTGGAAATGTG-AAAAGATCCTAGATACTTAATGAACTTT--AAAAAATACACTTAT--  
-aaatggaagctaaataa-tgtgtatgcatggac-acagcatggaataagagacactggacactcagaaggctgt---  
-----gggtgttggggaggttgagggg-tgcaaaattatgtaatgagcacaatgtacactatttgggtaatgggta  
cgctaaaagctcagacttcaccactgtgcaatatatccatgtatcaaaaactgcacttgta-cccctaagtgtatacaa  
ataaaataaattaataaat---TAAACAAGTAAGA---GAA-TGCTTACATTTTTCTTAAGCAATTTCTTTAGAAGCA  
TG---TAT---CAAGCAAATACACAAAAGAAATTTATTTTCAGAGCCT--ATTT---ATCTTTTAAAAGTACAC-T  
TTTTGTTTT-----C--ACTGTAAGGAGAT----GATTGAACATGCTCCATTCTTATCATCAATGCAGG
```

>Rhesus

```
GTTTTCTAATTTTTAAAAGGAGATCAATTATACCTACCAACAAGGCAGTTATCAACAAGTTGTAGGGTTACAT-GAACA  
AGAGTTATTAAGCAAGTTTTGGAAATGTG-AAAAGATCCTAGATACTTAATGAACTTT--AAAAAATACACTTAT--  
-aaatggaagctaaataa-tgtgtatgcatggac-acaacatggaataagagacactggagactcagaaggctgt---  
-----gggtgttggggaggttgagggg-tgcaaaattatgtaatgagcacaatgtacactatttgggtaatgggta  
cgctaaaagctcagacttcaccactgtgcaatatatccatgtatcaaaaactgcactcgta-cccctaagtgtatacaa  
ataaaataaattaataaat---TAAACAAGTAAGA---GAA-TGCTTACATTTTTCTTAAGCAATTTCTTTAGAAGCA  
TG---TAT---CAAGCAAATACACAAAAGAAATTTATTTTCAGAGCCT--ATTT---ATCTTTTAAAAGTACACTT  
TTTTGTTTT-----C--ACTGTAAGGAGAC----GATTGAACATGCTCCATTCTTATCATCAATGCAGG
```

```

>Tarsier
GTTTTCTAATTTTTAAGAGGAGGTCATCATACTAGCAACAAGTTAGTTGTGAGCAAATTGTAGGATTACAT-GAATG
GGGGTTATTGAACAAGTTGAAGAAGCATGAAAAAATCTTACATGCTTCATGAACTTG---AAAAAATGGACTTAC--
-aatgggagctaaataa-tgtgtacacatggactagagtggtgggatgatagacattggagactcagaggaatgggag
agtagggaggagggtgaaggaagcgagga-tgaaaaattactcaaggggtaaaatgtatgctatttgggtgatgggta
cactaaaatcccagacttaactgctatgcaatatattcatgtatcaaaactgcatttgtatcccctaaatttatgcaa
atgaaataaataaaaaattt---CA---AAATAAGA---GAA-CCCTCAAGTCTTTCTTAGGTGATTCACTTGGGAAGCA
TGACATAT----CAACCAAATAACCAA-----TACAGGGCTT--GCTG----ATCTTTTAAAAGTACTC-C
TTTTTTTTTTTTGAC--TCTATGAGGTGAC----AATGGAGCATGTT--ATTCTTATAATTAATGCGAG
>Bushbaby
GTTTTCTAATTTTTAATAGGAAGTGATCATACTACCAACAAGATAGCTGTGAACAACCTTGCAGGGTTACATAAAACA
AGGCTTATTGAACAAGTTGGAGAAATGTG-AAAAGAT-TTAGCTGCTTAATGAATTTT-----
-----
-----
-----TAAAAATAAGA---GAA-TGCGCAAGTCTTTCTTAGGTAATTCACTCAGAAGTA
GGACATAC----CAACCAAATAAACAAAAGAGACTTATTTTCAAGGATTTATTTT---ATCTTTCAAAGTACAT-T
TA----TTT-----CTAACTATAAGGAGAT----GATCTAACATGGTCTATTCTTATAACCAGTGCAGG
>Mouse_lemur
ATTTCTAATTTTTAAGAGGAGGTAATCACACCTACCAACAAGGTAGTTATGAACAAGTTGTAGGGTTACAT-GAACA
AGGGTTATTGAACAGGTTGTAGAATTGTG-AAAACAT-----CTTAATGAACTTT-----
-----
-----
-----CAAAAATAAGA---GAA-TGCTCAAGTCTTTCTCAGGTAATTCACTTGGGAAGCA
TGATATAG----CAGCCAAATACACAAAAGTGATTTATTTTCAAAGCT---CTTTAAAATATTTTTAAAGGTGCAT-T
TT----TTC-----C--ACTATAAGGAGAT----GATCAAACACGATCTATTCTTATAATCAGTGC---
>Mouse
TTTTTTTAATTGTTAAGAGGAGGTAATTACATCTAAC-TCAGGAT-----
-----AGCTAATTCTACACGCTTAATGAACCTG-----
-----
-----
-----AAAGAAATAAAA---GAACTGCTTTTCATCTTTTGTGG-----TGACAGA
GGTTTTCCATGCCAATTAATACACAAAAGAACTT--ATTAGGATTT--GTTT---ATC-----T
TT----TTG-----T--ACTTTAAAGAAATGCTTATTTGAACCTCCTGGATTCTTACAACCAGTGCCTG
>Guinea_pig
GTTTTCTAATTTTTACAAGGAGGCTGTCCTGTCTACCATTAGGATA-----
-----CTTGAACAAATAGCATAAATGTG-AGGTGATCCCAGGGGCTTAATGAGCTTT-----
-----
-----
-----AAAGAAATAAAA---GAG-TGTCCTGTGTTTCTTAGATGTTTCACTTGGGAAGCA
TGATGTTT---CAACCGAATACAC-AAAAAATTCATATTTAGGACTT--ATTT---ATCTTTTAAATAC-CACAT
TT----TTC-----C--ATAATAAGAGACGATGGTTTTCAATATGCTTAG----TGTAATCAGTGCAGG
>Dog
GTTTTCTAATTTTTAAGAGGAGGTAAGCTCATCTACCAGC-----
AGAATTATTGAATAAGCTGTAGAAATGTG-AAAAGAT-TTATGTGCTTAATGAACTTT-----
-----
-----
-----AAAAAGT--A---AGA--CTCATCTTTTTTAGGCAGTTAACTTGGGAAGCATGA
TG---TAT---CAACCAAATACACAAAAGAAATTTATTTGGAGGACTT--GTTT---ACCTTTGTAAAGCACAT-A
TTGTTTTTG-----C--ACTAGAAAGAGATGATTGTTTGGAGCATGCTGTATTCTTATAATGAGTGCAG-

```

## Marker L109

>L1PB4\_3'-End

```
-----tgagggatgagaaattacctaw-----  
-----tgggatataatgtacactattcgggtgatggktacactaaaagc-----ccagacttcaccactacgcaat  
atatccatgtaacaaaactgcacttgtaccccctaaat-----ctataaaaaataaaaaaa-----  
-----
```

>Human

```
-CAGGCATTTACAAGCGCTAGCTAGCTTCCATGGCTAGCATTAAATTAATAAGA---GGTTTGAGAT---AAAACCTATA  
AATTAA---tggatataatgtgcattattcagatga--gttacctaaaagctgaccagactttaccactacacaat  
atatccatgtaacaaaactgcactggtagcccttacat-----ttatataaataa-a-----CAAACCTAAATT  
GT---ACCCGAAATGA-----GTCTTCGGCATCTCTGCCCAATTTCTCCAAGGAAGCCCGTAGAAG-
```

>Chimp

```
-CAGGCATTTACAAGTGTAGCTAGCTTCCATGGCTAGCATTAAATTAATAAGA---GGTTTGAGAT---AAAACCTATA  
AATTAA---tggatataatgtgcattattcagatga--gttacctaaaagctgaccagactttaccactacacaat  
atatccatgtaacaaaactgcactggtagcccttacat-----ttatataaataa-a-----CAAACCTAAATT  
GT---ACCCGAAATGA-----GTCTTCGGCATCTCTGCCCAATTTCTCCAAGGAAGCCCGTAGAAG-
```

>Orangutan

```
-CAGGCATTTACAAGTGTAGCTAGCTTCCATGGCTAGCATTAAATTAATAAGA---AGTTTGAGAT---AAAACCTGTA  
AATTAA---tggatataatgtgcattattcagatgatggttacctaaaagacgaccagactttaccactacacaat  
atatccatgtaaaaaaactgcactggtagcccttacat-----ttatataaataa-a-----CAAACCTAAATT  
GT---ACCCGAAATGA-----GTCTTCGGCATCTCTGCCCAATTTCTCCAAGGAAGCCTGTAGAAG-
```

>Baboon

```
-CAGGCATTTACAAGTGTAGTTACCTTCCATGGCTAGCATTAAATTAATAAGA---GGTTTGAGAT---AAAACCTATA  
AATTAA---tggatataatgtacattattcagatgatggttacctaaaagctgaccagactttaccactacacaat  
atatccatgtaacaaaactgcactggtagccctttacatttatacatttataaataa-a-----CAAACCTAAATT  
GT---ACCCAAAATGA-----CTCTTTGGCATCTCTGCCCAATTTCTCCAAGGAAGCCCGTAGAAG-
```

>Rhesus

```
-CAGGCATTTACAAGTGTAGTTACCTTCCATGGCTAGCATTAAATTAATAAGA---GGTTTGAGAT---AAAACCTAGA  
AATTAA---tggatataatgtacattattcagatgatggttacgctaaaagctgaccagactttaccactacacaat  
atatccatgtaacagaactgcactggtagccctttacatgtatacatttataaataa-a-----CAAACCTAAATT  
GT---ACCCAAAATGA-----CTCTTTGGCATCTCTGCCCAATTTCTCCAAGGAAGCCCATAGAAG-
```

>Marmoset

```
-CAGGCCTTTACAAGTGTAAATTACCTTCCATGTCTAGCATTAAATAATAAGA---GGTTTAAGAT---AAAACCTATA  
AATCGA---tggatataatatacattatttaggtgatggttacctaaaaccaccagactctaccactgcacgat  
atatccatgtaacaaaactgcacttgtactccttacat-----ttacataaataa-a-----CAACCTCTAAATT  
GT---ACCCAAAATGA-----CTCTTCGGCATCTCTGCCCAATTTCTTCAAGGAAGCCCGTAGCA--
```

>Tarsier

```
-CAGGCATTTACAAATGCT-GTTACTTTCTATGTCTAATGTTAATTAATAAGA---AGTTTGAGAT---A-----TA  
AATCAA---tgggtacaatgcacattatttaggtgatgggtcacattaaaagat---cagatttcactaccagccat  
atatccaagtaataaaaattgcacttgtactccttaact-----ttatacaaaatttta-----AAAACCTATAAGTC  
AT---ATACAAAAGGA-----CTCTTTGGCACCTTGCCCAATTTCTCCAAGAAGCTCATAGCT--
```

>Bushbaby

```
-CAGGCATTTACAAAACGCTAGTTACCTTCCAGGTCTGGGGCTAATTAATAAGA---GGCTTGAGAT-----  
-----  
-----AAGACTATAAATC  
AG---AACCAAAATGA-----CTCTTCGGCACCTTGCCCAATTTCTCCAAGAAGCCACAGCC--
```

>Mouse\_lemur

```
-CAGGCATTTACAAATGCTAGTTACCTTCCATGTCTAAGGTTAATTAATAAGA---GGTTTAAGAT-----  
-----  
-----AAAACCTATAAATC  
AA---AACCAAAATGA-----CTCTTTGGCACCTTGCCCAATTTCTCCAAGAAGCCCATAGCCAT
```

>Tree\_shrew

```
-CAAGCACTTACAAAATTAGCCACCTTCTTGTCTAACATGAATTAGTTAAA---GATTTGGGAT-----  
-----  
-----CAAACCTACAAATC  
AC---ACCCAAAATGA---AGCCTCCTTGATACCCACCCCAATTTCTCCAAGAAGCCCATAGCT--
```

>Mouse

ACAGGCGCATGCTAGCACCAGGAACTTTCCCTGGTGAACATTCTCGAATAAAG---GGTTTGGGAC-----  
-----  
-----TTTACTATAAGTT  
AT---AACC-AAATGATTAGGCCTCTTTGATACCCCTGCCCCATTTCTCCTAAGAAGCTGGTGCCT--

>Guinea\_pig

-GAGGCATTTACACAT--GAGTTACCCTCCCTGGTTAACATAAATGAGTAAGATGAGTTTTAAGAT-----  
-----  
-----ACAGCTATAAATC  
AT---ACCC-AAATGATTGAATCTCTTTGATGCCCCACCTCTAATTTCTGCAAAGAAGCCCATCATT--

>Dog

-CGGGCACTTAGAAATGTTTCATTACTTTCCCTATCTAACATTAATTA-TAAGA---GGCTTGGAA-----  
-----  
-----AAAAC TATAAATC  
AT---ACCCAAAAGGACTAAGCCTCTCTGACACTCTCGCCCCGTTCTCCAAGGAAGCCCATAGCT--

>Horse

-CAGGCATTTACAAGTGTTTCATTACCTTCCCTGACTAACATTAATTAATAAGA---GGCTTGGGA-----  
-----  
-----AA--CTATAAATC  
AT---ACTCAAATGACTAAGCCTCTTTGACACCCCGCCGCAATTTCTC-AGAGGAGCCCAAAGCT--

## Marker L111

>L1PB4\_3'-End

```
tggatggaactggaggccattatcctaagtgaatagacatacagagtggaataatagacactggagactcmgaaagg
-----tgggaggggtgggaggggggtgaggg
atgagaaattacctawtgggtacaatgtacactattcgggtgatggktacactaaaag--cccag-acttcaccacta
cgcaatatatccatgtaacaaaactgcact----tgtaccctcctaaatctataaaaaataaaaaa-----
-----
-----
```

>Human

```
AATACTTTAA-----TTATT-TTTTCACTTACA---TTTTATAGTATTT--ATTGTATGCACCAGAGTG-ATTGGTGA
TAAAAATGGAGGCCCT-----ACTTAAG----TCT-----AAGAGAGTTCT----tgtgaaagtgggagggggatgaggg
ttggaaaattgcctggttaggtgccatggtcactattcagatgatggatacactaaaag--tgcag-acttcaccacta
cgccatatatgctgtaagaaattggcact----tgtacccttgaatacataaaaactttataaaaaa-tt-a---AA
AAGAGTTACT---GTAATGATT-----
ATAAAATGAAAATTCTACGTCATGAGAAAGCATTGTGCCATATTTTTACCAGGGAGCA---TTTTTTTTTTCCTTAGGGG
AAATGAAAAATAATGGCATCTATGATCT
```

>Chimp

```
AATACTTTAA-----TTATT-TTTTCACTTACA---TTTTATAG----T--ATTGTATGCACCAGAGCG-ATTGGTGA
TAAAAATGGAGGCCCT-----ACTTAAG----TCT-----AAGAGAGTTCT----tgtgaaagtgggagggggatgaggg
ttggaaaattgcctggttaggtgcaatggtcactattcagatgatgggtacactaaaag--cgcag-acttcaccacta
tgcaatatatgctgtaagaaattggcact----tgtacccttgaatacataaaaactttataaaaaa-tt-a---AA
AAGAGTTACC---GTAATGATT-----
ATAAAATAAAAATTCTAAGTCATGAGAAAGCATTGTGCCATATTTTTACTGGGAGCA--TTTTTTTTTTCCTTAGGGG
AAATGAAAAATCATGGCATCTATGATCT
```

>Orangutan

```
AATACTTTAA-----TTATT-TTTTCACTTATA---TTTTATAATATTT--ATTGTATGCACAAGAGCT-ATTGGTGA
TAAAAATGGAGGCCCT-----ACTTAAG----TCT-----AAGAGAGTTCT----tgtgaaagtgggagggggatgaggg
ttggaaaattgcctggttaggtacaatggtcactattcagatgatgggtacactaaaag--cgcag-acttcaccacta
cgcaatatatgctgtaagatattggcactggttaggtacccttgaatatataaaaactttctaaaaaa-tt-a---AA
AAGAGTTACT---GTGATGATT-----
ATAAAATAAAAATTCTAAGTCATAAGAAAGCATTGTGCCATATTTTTATTGGGAGCATTTTTTTTTTTTTTTTCCTTAGGGG
AAATGAAAAATAATGGCATCTATGATCT
```

>Baboon

```
AATGCTTTAA-----TTATT-TTTTCACTTACA---TTGTATAGTATTT--ATTGTACACACAAGAGCT-ATTGGTGA
TAAAAATGGAGGCCGTCATAGCCTTAGG----TCT-----AAGAGAGTTCT----tgtgaaagtggga-ggggatgaggg
ttggaaaactgcctggttaggtatagtgttccctggtcagatgatgggtacactaaatg--agcag-acttcaccggtta
cgcaatatacgcctgtaagaaatcggcact----tgtacccttgaatacataaaaacttcctaaaaaa-ttaa---AA
AAGAGTTACT---GTGATGATT-----
ATAAAATAAAAACTGTAAGTCATAAGAAAGCATTGTGCCATATTGTCATTGGAAGCA---TTTTTTTCCCCTTAGGGG
AAATGAAAAATCATGGCATCTATAATCT
```

>Rhesus

```
AATGCTTTAA-----TTATT-TTTTCACTTACA---TTGTATAGTATTT--ATTGTACACACAAGAGCT-ATTGGTGA
TAAAAATGGAGGCCGTCATAGACTTAGG----TCT-----AAGAGAGTTCT----tgtgaaagtggga-ggggatgaggg
ttggaaaactgcctggttaggtacaatggtcctggtcagatgatgggtacactaaatg--cgcag-acttcaccgcta
cgcaatatacgcctgtaagaaatcggcact----tgtacccttgaatacataaaaactttataaaaaattt-a---AA
AAGAGCTACT---GTGACAATT-----
ATAAAATAAAAACTGTAAGTCATAAGAAAGCATTGTGCCATATTTTTATTGGAAGCA--TTTTTTTTTCCCCTTAGGGG
AAATGAAAAATCATGGCATCTATAATCT
```

>Marmoset

```
AATGCTTTAA-----TCATT-TTTTCACTTAGA---TTTTATAGTATTT--ATTGTATCCACAAGAGCT-GTTGGTGA
AAAAAATGGAGGCCCT-----ACTTAAG----TCT-----AAGAGAGTTCT----tgtgaaagtgggagagggatgaggg
ttggaaaattgcctgctgggtacgatggtcactattcagatgacaggtacatgaaaag--cgcag-acttcaccgcta
cgcagtatatccatgtgagacctcggcacg----tgtaccctcgaatgtataaaaacttttgaaaaa-tt-----AA
-AGAGCTACT---GTGATGATTATAAAATAAAATTCTTTTTTTTTTTTTCACCTTGCTCTCATTGGCAAACAGCATGG
ATAAAATAAAACTTCTAAGTCAT-AGCAAGTATTATGCCATAGTTTTATTGGCAGCA--TTTTTTTTTTCCTTAGGGG
```

AAAGGAAAAATAATGGCATCTATAATCT

>Tarsier

AATGCTTTAG-----CCATTATTTTCACTTATA---TTTTATACTTTTT--ATTGTATGCACAAGGGCT-ATTGATGA  
-GAAAATTGAGGTCT-----AATTAAG----CCT----AAAAGAGTTCT----tgtggaagtgggatgggaacgaagg  
ttagaaaatgacctattgagttcaatgttcacgtttcaggtgatggctacactaaaagacttcatcacttcatcacta  
tgcaatatatgcttgaagaatctgcatt---tggaccccc-aaatata-----cttttaaatt-tt-a---AA  
AAGAGTTCTT---GAGCT-AGT-----  
ATAAAATAAAGCTTCTAAGTGATAAGAAAGCATTGTGCCATATTTTAATTGGCAGTA---TTTTTTTCCCTTAGGAG  
AAGATAAAAATAATGGCATCTATAATTT

>Bushbaby

AGAGCCTTGA-TCCCTTTTT-TTCTCACTTCTATTGTTACTTAGTTTTT--ATTGTATGCACAAGAGGT-ATCCATGA  
CAAAAATAGAGGTCT-----AATTAAG----TCT-----  
-----  
-----GA  
AAGAGTTCTT---GTGATAAGT-----  
ATAAAATCAAAGCCTGAGTGATAAGAAAGCGCTGTGCCATATTTTAATTGGCAACA--TTTTCTCTTTCCTTAGA-G  
AAACATGAAACAAGGGCATCTGGAATCT

>Mouse\_lemur

AATGCCTTGA--CCATTTTT-TCCTCACTTATA-----TTTTT--ATTGTATGCACAAGAGGT-ATCCATGA  
CAAAAATAGAGGTCT-----AATTAAG----TCC-----  
-----  
-----AA  
AAGAGTTCTT---TTGATAAGC-----  
ATAAAATAAAAATTCTGAGTGATAAGAAAGCATTGTGCCATATTTTAATTGGCAGCA--TTTTTCC--TCCTTAGG-G  
AAAAATAAAAATAAAGGCAT-TGCAATCT

>Tree\_shrew

AATGCCTTAAACATTTTTTTT-TTCTCACTTATA---TTTTCACATTTTTTAAATTGTATGCATAAGAGCC-ATCTATGA  
CAAATGTAGAAATCT-----AATTAATCTAATCT-----  
-----  
-----AATT  
AAGAGTTCTT---GAGATAATT-----  
ATAAAATAAAAATTATAAGTGGTAAGAAAGCATTATAACCATATTTTAATTGGCAGCA--TTTTTTTT---TAAAGTG  
GAAAATAAAAATAATGACCTTTTATAATCT

>Dog

AATGCCTAATCA---TTCGT-TCCTTACTTAT-----GTTTTT--ATTGTATGCAGAAGAGTTAATCTATGA  
CCAAAATGGAAGTCT-----AATTATG----TCT-----  
-----  
-----AA  
AAACGTTCTT---GCCATAA-----  
GACAAATAAA-AGTCTAAGTGATCAAAAAGCATTGCACCATATTTTAATAGGCAGCA--TTTGTTTTTTCCTTGGT-G  
GAAAATAAA-TAATGCCATCTACAATCT

## Marker L112

>L1PB4\_3'-End

```
aaaaaagaatgaaatcatgtccttttgagcaacatggatggaactggaggccattatcctaagtgaa-----  
-----atagacatacagagtggaataatagacactggagactcmg  
aaaggtgggaggggtgggaggggggtgagggatgagaaattacctawtgggtacaatgtacactattcgggtgatggkt  
acactaaaagcccagacttcaccactacgcaatatatccatgt-aacaaaactgcacttgtaccccctaaatctataa  
aaataaaaaaa-----  
-----
```

>Human

```
TCATAGCTCAATTTTCATT-----AAAAAAGTCCTCAGAATAATTTTTCTTTCCATCCA-TATTTTATCTACCT  
TTGTACATTCAAAGATTC---TTGAATTTACTCTC---attaacataaagggtggaataatagacattgcagactatg  
gaagatgggaggggtggaagtggggcaagccttgaaaatttaccttttgggtacaatgttcattatatt-ggtgggtgggt  
aaactaaaattccagatttcaccattacacagtgatgcatgtaagaaatccacacttgcattccctaaatctataa  
aaagaaaaaggaaaaaaa----agaaaacatattt---TTGAATGTACTCT---GCCAAAATAAACGTCATATAATCC  
AGGTTCCCTCTTTGGT----AGGACAGAGGAGCTGCC-GAAACCTTTGAAATT
```

>Chimp

```
TCATAGCTCAATTTTCATT-----AAAAAAGTCCTCAGAATAATTTTTCTTTCCATCCA-TATTTTATCTACCT  
TTGTACATTCAAAGATTC---TTGAATTTACTCTC---atgaacataaagggtggaataatagacattgcagactatg  
gaaggtgggagggtagaagtggggcaagccttgaaaatttaccttttgagtacaatgttcattatatt-ggtgggtgggt  
acactaaaattccagacttcaccactacacagtgatgcatgtaagaaatccacacttgtattccctaaatctataa  
aaagaaaaaggaaaaaaa----agaaaacatattt---TTAATGTACTCT---GCCAAAATAAACGTCATATAATCC  
AGGTTCCCTCTTTGGT----AGGACAGAGGAGCTGCC-GAAACCTTTGAAATT
```

>Orangutan

```
TCATAGCTCAATTTTCATT-----AAAAAAGTCCTCAGAATAATTTTTCTTTCCATCCA-TATTTTATCTACCT  
TTGTACATTCAAAGATTC---TTGAATTTACTCTC---attaacataaagggtggaataatagacattgcagactatg  
gaaggtgggtgggtggaatggggcaagccttgaaaatttaccttttgggtacaatgttcattatatt-ggtgggtgggt  
acactaaaattccagacttcaccgctacacagtgatgcatgtaagaaatccacacttgtattccctaaatctataa  
aaagaaaaaggaaaaaaa----agaaaaaatattt---TTAATGTACTCT---GCCAAAATAAATGTCATATAATCC  
AGGTTCCCTCTTTGGT----AGGACAGAGGAGCTGCC-GAAACCTTTGAAATT
```

>Baboon

```
TCATAGCTCAATTTTCATT----TAAAAAAAAGTCGGCAGAATAATTTTTCTTTCCAT----CATTTTATCTACCT  
TTGTACATCCAAAGATTC---TTTCATGTACTCTC---atgaacataaagggtggaataatagacattgtagactatg  
gaaggtgggagagtggaagtggggcaagccttgaaaatttacctggtgagtacaatgttcattatatt-ggtgggtgggt  
acactaaaattccagacttcaccaccacacagtatattcatgtaagaaatccacacttgtattccctaaatctataa  
aaag-----tattt---TTAATGTACTCT---GCCAAAATAAATGTCATATAATCC  
AAGTTCCCTCATTGGTAGGAAGGACAAAGGAGCTGCC-AAAACCTTTGAAATT
```

>Rhesus

```
TCATAGCTCAATTTTCATTAAAAAAGTCGGCAGAATAATTTTTCTTTCCATCCATTATTTTATCTACCT  
TTGTACATCCAAAGATTC---TTTCATGTACTCTC---atgaacataaagggtggaataatagacattgtagactatg  
gaaggtgggaaagtggaagtggggcaagccttgaaaatttacctggtgggtacaatgttcattatatt-ggtgggtgggt  
acactaaaattccagacttcaccactacacagtatattcatgtaagaaatccacacttgtattccctaaatctataa  
aaag-----tattt---TTAATGTACTCT---GCCAAAATAAATGTCATATAATCC  
AAGTTCCCTCATTGGTAGGAAGGACAAAGGAGCTGCC-AAAACCTTTGAAATT
```

>Marmoset

```
TCATAGCTCAATTTTCATT-----AAAGTCTGCAGAATAA-TTTTACTTTTCATCTATTATTGTATCTACTT  
TTGTACATCCAATGATTC---TTTAATATACTCTC---atggacataaatggtggaataacagacattgtagactatg  
gaaggtgtgaggggtgggaatggggcaagcattgaagatttacccggtgggtacaatgttcattatatt-actgggtgggt  
acattaaaagcccagacttcaccaccacacagtatatgtagtaagaaatccacacttgtattccctaaatataataa  
aaagaaatgaggaaaaacattattaaaaatatt---TTTAATATACTCT---GCCAAAATAAAGGTCATATAATCC  
AGGTTCCCTCTTTGGT----AGGACAGAGAAGCTATC-AAAACCTTTGAAATT
```

>Tarsier

```
TCATAACTCAATTTTCATA-----AAAATATGCAGATTAA-TTTTGTGTTGACATCCACTATTCTATCTAGCT  
TTGCACGTACAGAGATTA---TTTAATGCACTTTT---aggggcatacagagaaaaataatagacattagagactaca  
aaaggcaggcagggtgggagagggcatgaggggtgaaaaattacctgctgagatgatgttcacttttcaggtaaatgaat  
acactaaaaccagac--cgccactaccaatatatgcatg-taagaaatccaca----tgtaccctcaccataaaa  
ataaaaaataatagaaaaa-----gattc---TTAATGTTCTCT---GCCTAAATAAAGGTTATAAAATCC
```



```

AGGTTTCTCTTTTGGT----AAAACAGAGAAGCTGTC-AAAAACTTTGAAATT
>Bushbaby
TCATAACTCAATTTTCATA-----ATACATCTGCAGAATAG-TTTCACTTTCCATCTATTATTCTACCTACTT
TTGGATATCCAAAGATTC-----
-----
-----ATTAATGTTCTCT--GCCAAAATTAAGTCCATATAGTCC
AGGTTCCCCCTTCGGT----AAAACAGAGAAGTTGTC--AAAGCTTTGAAGTT
>Mouse_lemur
TTGTAACTAAATTTTCATA-----ATGAATCTGCAGAATAA-TTTTGCTTTCCATCTATTATTCTGCCTATCT
TTGCATATCCAAAGATTC-----
-----
-----ATTAATATGCTTT--GCCAAAATAAAGG-CATGTAATCC
AGGTTCCCCCTTTGGT----AAGACAGAAGAGCTGTC-AAAAGCTTTGAAATG
>Tree_shrew
TCATAACTCAGTTTTTCATA-----ACAAATCTGCTGAATAATTTTTTCTACCA---ATTATTCTGCCTATCT
CTGCATATCTAAAGATTC-----
-----
-----TCTAAAGTAATCT--GCCAAAATAAAGCCATATAAATTC
GTTTTCTGTTTTTCAT---AGGGCAGAGGAACTACC-AAAAGCTTTGAAATT
>Mouse
TTCTAAGTCAATTTCCATA-----GCATATCAGTTGAATAA-TGTGACTTTTCAACTATTACTCAATCTGCCT
CTGCATATCCA-GGATTC-----
-----
-----TCTGTGTATTCTT--TCC-AAATCAAACCAATATAATCC
AGATATTCTCTTTTATT---AGCCAGATGGGTTTTTCAAAAAATTTAA--GAT
>Guinea_pig
TCAAAACTCAATTTTGTGTA-----ACAAATTGGCAGAAAAA-TATTCTTTTCCATCTATTATTTGATTTATTT
TTGCATATTCAAAGATTA-----
-----
-----TTTAATGTACTCT--TCAAAAATAAAATCCATATAATCC
AGATTTCTCTTTTGAT---TGAATGTAAGAGTTATC-ACAAGCTTTAAAATT
>Dog
TCATAACTTAATTTT-----CAAATAA-TTTTGCTTTTCTATCCATTATTCTACTTGCCT
TTGCCTATTCAAAAATC-----
-----
-----T--AATAT--CCT---CCAAA-TAAAGGCCATGTG-TTC
AGACTTCTCTTTAGC---AGGACAGAGGAGCTGTC-AAAAGCTTTGAAATC
>Horse
TCATAACACAATTTTCATA-----ACAAATCTGCAAAATAA-TTTTGCTTTTCTATCCATTATTCTATCTATCT
TTGCATGTCCAAAGATTT-----
-----
-----TTTAATATACTTT--TCCAAAAGAAAGGCCATATA-TCC
ATATTTCCCCTTTGGT----AGGACAGAGGACCTGTC-AAAAGCTTTGAAATT

```

## Marker L113

>L1PB4\_3'-End

```
-----agtgatccatcaatggatgactggataaagaaaatgtggtatatatacaccatgga
-----atactactc-----
-----agccat
aaaaagaatgaaatcatgtccttttgagcaacatggatggaactggaggccattatcctaagtgaa---actcagaa
acagaaagtcaaataccgcatgttctcacttataagtgggagctaaacaatgkgtacacatgatagacatacagagtg
gaataatagacactggagactcmgaaaggtgggaggggtgggaggggggtgagggatgagaaattacctawtgggtaca
atgtacactattcgggtgatggktacactaaaagcccagacttcaccactacgcaatatatccatgtaacaaaactgc
acttgtaccccctaaatctataaaaaataaaaaa-----
-----
-----
-----
-----
-----
```

>Human

```
CTCAGAAGTGCAAAGGAGAAGTATTCAACAGGGTAT-AACTAGATCTAGTGTGCATTTTAAACATTTGAAATACATATT
AAAATTGATGCATTT---AAAATGAACTCATG---atattattc-----
-----agccat
aaaagagaatgaaaccatgtccttttgagcaacatggatggaactggagtctattatcataagtgaacaacacagaa
acagaaagtcaaatactgcatgttctcatttatcagtgagagctaaaaaatgggtacacatg---gacatacagtggtg
gagtaatagacactgaagactcgggaaggggtgagagagtcagagggggatgggggaatgagaaattatthaatgggtaca
atgtatattat---ggtgatgaatacaccagaagcctggacttcaccactacataatatccatgtaacaaaacgggt
acttgtactcattaaatattatacaataaattaaatttaaaat---AAAATAAGCTCATG---AACACCAGTCTATCT
--GCACCTTCCAATACTTTCTG--AAAAAAAAA-----CACATAA-----ATTACATGG
-----TATACTGTATACTCTG-ATGCTAAAGAA-TAAGTGTCTATTTTTCAATTAAATA---TATATA---AAAAAA
GATTTGAATGTTTAAATTAATTGACAGCTGATCTAAAAAAAAA---AGGTAATCAGAA-TTTTTTCAT-----
TAGTTGTCACTACCTAGCAAATGTACAA-CCAGAAAGGAATTCACAGTGGAACTAGACTCCTGTGTCCTCC-----
TGACTGCTATAGAATGTAG-GAACATCACCATA
```

>Chimp

```
CTCAGAAGTGCAAAGGAGAAGTATTCAACAGGGTAT-AACTAGATCTAGTGTGCATTTTAAACATTTGAAATACATATT
AAAATCGATGCATTT---AAAATGAACTCATG---atattattc-----
-----agccat
aaaagagaatgaaaccatgtccttttgagcaacatggatggaactggagtctattatcataagtgaacaacacagaa
acagaaagtcaaatactgcatgttctcatttataagtgagagctaaaaaataggtacacatg---gacacacagtggtg
gagtaatagacactgaagactcgggaaggggtgagagagtcagagggggatgggggaatgagaaattactthaatgggtaca
atgtatattat---ggtgatgaatacaccagaagcctggacttcaccactacataatatccatgtaacaaaacagt
acttgtactcattaaatattatacaataaacttaaaatttaaaat---AAAATAAGCTCATG---AACACCAGTCTATCT
--GCACCTTCCAATACTTTCTG--AAAAAAAAAC-----CACATAA-----ATTACATGG
-----TATACTGTATACTCTG-ATGCTAAAGAA-TAAGTGTCTATTTTTCAATTAAATA---TATATA---AAAAAA
GATTTGAATGTTTAAATTAATTGATAGCTGATCTAAAAAAAAA---GGTAATCAGAA-TTTTTTCAT-----
TAGTTGTCACTACCTAGCAAATGTACAA-CCAGAAAGGAATTCACAGTGGAACTAGACTCCTGTGTCCTCC-----
TGACTGCTATAGAATGTAG-GAACATCACCATA
```

>Orangutan

```
CTCAGAAGTGCAAAGGAGAAGTATTCAACAGGGTAT-AACTAGATCTAGTGTGCATTTTAAACATTTGAAATACACATT
AAAATCGATGCATTT---AAAATGAACTCATG---atattattc-----
-----agccat
aaaaatagaatgaaaccatgtccttttgagcaacatggatggaactggagtctattatcataagtgaacaacacagaa
acagaaagtcaaatactgcatgttctcatttataagtgagagctaaaaaatgggtacacatg---gacatacagtttg
gagtaatagacactgaagactcgggaagggtaagagagtcagagggggatgggggaatgagaaattatthaatgggtaca
atctatattat---ggtgaagaatacaccagaagcccagacttcaccactacataatatccatgtaacaaaacgggt
acttgtactcattaaatattatacaataaattaaatttaaaat---AAAATAAGCTCATG---AACACCAGTCTATCT
--GCACCTTCCAATACTTTCTG--AAAAAAAAA-----CACATAA-----ATTACATGG
-----TATACTGTATACTCTG-ATGCTAAAGAA-TGAGTGTCTATTTTTCAATTAAATA---TATATA---AAATAA
GATTTGAATGTTTACATTAATTGATAGCTGATCTAAAAAAAAA---GGTAATCAGAA-TTTTTTCAT-----
AAGGTGTCACTACCTAGCAAATGTACAA-CCAGAAAGGATTTACGACTGGAACTAGACTCCTGTGTCATCTCCG-----
```

TGACTGCTATAGAATGTAG-GAA-----  
>Baboon  
CTCAGAAGTGCAAAGGAGATATATTCAACAGGGTAA-AACTAGATCTAGTGTGCATTTTAAACATTTGAAATACACATT  
AAAATTGATGCATTT----AAAATGAACTC-----atattattc-----  
-----aaccat  
aaaaaagaatgaaaccatgctcttttgcagcaacatggatggaactggagtctattatcataagtgaaacaacagagaa  
acagaaagtcaaatactgcatgttctcatttataagtgggggctaaataatgggtatacatg--gacatacagtatg  
gaataatacacactgatgactcggaagtgtggaagagtcagagggcggatggggaatgagcaattatttaattgggtaca  
atgtacattaatt-ggtgatgaatacaccaaaaagcccagacttcaccactacataatataatccatgtaacaaaactgt  
atgtgactcattaaatttatacaaaataaattaaatt-----a---AAAACAAGCTCATG---AACACCAGTCTATCT  
--GCACCTTCCAACACTTTCTG--AAAAAATAA---ACCACATAA-----ATTACATGG  
-----TATACTGTATACTCTG-ATGCTAAAAAA-TGAGTACTATTTTTCAGCTAAGTA---TATATA---AACGAA  
GATTTGAATGTTTAAATTAATTGATAGCTGACCTAAAAAATAATGGGCAATCAGAA-TTTTTTCAT-----  
TAGTTGTCACTACCTAGCAAATGCACAA-CCAGAAAGGAATTCACAGTGGAACTAGATTCCCTGTCATCCTCC-----  
TGACTGCTATGGAATGTAA-GAACATTGCCATC  
>Rhesus  
CTCAGAAGTGCAAAGGAGACGTATTCAACAGGGTAT-AACTAGATCTAGTGTGCATTTTAAACATTTGAAATACACATT  
AAAATTGATGCATTT----AAAATGAACTCATG---atattattc-----  
-----aaccat  
aaaaaagaatgaaaccatgctcttttgcagcaacatggatggaactggagtctattatcataagtgaaacaacagagca  
acagaaagtcaaatactgcatgttctcatttataagtgggggctaaataatgggtatacatg--gacatacagtatg  
gaataatagacactgacgactcggaagtgtggaagagtcagagggcggatggggaatgagaaactatttaattcgggtaca  
atgtacattaatt-ggtgatgaatacaccaaaaagcccagacttcaccactacataatataatccatgtaacaaaactgt  
atgtgactcattaaatttatacaaaataaattaaatt-----a---AAAATAAGCTCATG---AACACCAGTCTATCT  
--GCACCTTCCAACACTTTCTG--AAAAAATAA---CCACATAA-----ATTACATGG  
-----TATACTGTATACTCTG-ATGCTAAAAAA-TGAGTACTATTTTTCAGCTAAGTA---TATATA---AAAGAA  
GATTTGAATGTTTAAATTAATTGATAGCTGACCTAAAAAATAATGGGCAATCAGAA-TTTTTTCAT-----  
TATTTGTCACTACCTAGCAAATGTACAA-CCAGAAAGGAATTCACAGTGGAACTAGATTCCCTGTCATCCTCC-----  
TGACTGCTATGGAATGTAA-GAACATTGCCATC  
>Marmoset  
CTCAGAAGTGCAAAGGAGAAGTATTCACTGGGGTGT-AACTAAATCTAGTGTGCATTTTAAACATTTGAAATACACATT  
AAAATCAATGCATTT----AAAATGAACTTGTA---ctattcagccataaaaaagaatgaggtcagtggggtgtaact  
aatctagtgatgcattttaacatttgaaatacacattaaatcaatgcattttaaatgaacttgactattcagccat  
aaaaaagaatgagggccatgctcttttgcagcaac----atggaaccagagttcattatcataagcaaaacaacacagaa  
acaaaaagtcaaatacagcatgttctcatttataagtggggagccaaataatgggtacacatg--gacatacactgtg  
gaataatcgatactgaagactcagaaggggtgagagatcgatggggaatggggaatgagaaattatttaattgggtaca  
atgtacattatct-ggtgatgaatacaccaaaaagcccagatgtcaccactacataatataatccacgtaacaaaactgt  
acttgactcattaaatttatacaaaataagttaaatttaaaat---AAAATAAGCTCATG---AACCCAGTCTATCT  
--GCACTTCCAATACTTCTG--GAAAGAAAAA-----ACATAA-----ATTACATGT  
-----TGTACTGTATACTCTG-ATGCTAAAGAA-TAAGTGGCTATTTTTCAACTAAATT---TATATA---AAAGAA  
GATTTGAATGTTTAAATTAATTGATACTGATCTTAAAAGAAA---AGGCAATCAGAA-TTTTTTAT-----  
TAGCAGTCACAACCTAGCAAACATACAA-CCAGAAAGGAATTCACAGTGGAACTAGGCTCCTGTCATCCTCC-----  
TGACTGCTATGGAATGTAA-AAACATCACTGTA  
>Tarsier  
CTCAGAATACCAAAGG-----GAGCAT-AGCTAGATCTAGTGTGCA-ATTAATAATTTGAAACACACATC  
AAAATGATACATTT----AAAATGAGCTCAA---atactattc-----  
-----agccat  
a-----gaaatcacacgtttcacaacaac-----tggaggccatcatcttgggtgaaacaactcagaa  
acagaaagccaactggtgcacatttttacttataagtggaaactaaacaatgaatgcacatg--gatacagagtgtg  
gaatgatggacacagaagactcagaaaggcaagaggggtcacaggggtattgtgagatgagaaattacttaattgatgca  
atatacgttattcaggttacagaaacactaaacgtccaggccttaccacaacacacatattcatgcaatgtagctgc  
acctttattctttaaactaatacaaacgaataaaatgaaaaat---AAAATGAGCATGTG---AA---CAGCCTATTT  
CAGCACCTCCAACACTTTCTG--GAAAAATAAT-----AC-----ATTGCGTGG  
ATGTACTATATTATCTACTCTG-ATACTAAAAAGTTAGTGGATATTTTTTAAACAAAATA---TATATT---AAAGAA  
GATTTGAATGTTGAAATTAATGGATTGCTGATCTGAAAAATAG-----TAACCACAA-TTTTTTCATTACGTTTACA  
TGAATGCCACAACCAAGCATGTGTACGA-CCAGTGGGAATTCACAATGGAAGTAGACTCCTGCCATCTTCT-----  
-----AG-GAA-----

>Bushbaby

CTCAGAATTCCAC-----GGATGTAAACTACAGGCAAGGTGCATTTTTAAAATCGGAAACACAGGTT  
AAAACCTGATGCATTC-----

-----AAAATAAGCTCATG---AACACGAGTCTATGT  
TTGTACTCTCCAGTACATCCTG-----AACAAAAG-----CATCAAG-----ATTACAGGG  
-----CTATGCTG-----CACTC-TCACTAGAGTA-TGAGTGACTATTCTTCAACCAAATA---TATGCT---A---AA  
GATTTGAATGCTTAAATTAAGTGACAGCTGACCTG---AAAA---AGTAATCACAG-TTTTTTCAG-----  
TAGTGGTCACAACCTAGCAATGGTACAACCCAGGCAGGAATTCACGTTGGAAGTCAACTCCTGCTGTTTCACCTCT-  
AGACTGCTATAGAATATAG--CACACCAGGG-A

>Mouse\_lemur

CTCAGAATTCAAAAGACAAGTGTCTACGAGGCATAAACTATATCCACTGTGCACTTTAAAATTTGAAACACACATT  
AA----TATGCATTT-----

-----AAAATAAGTCCATG---AACACTAGTCTATGT  
CAGTACCCTCCAGTATTTCTGGAGAAAAAAAAAAAA-----CCCCACA-----CTAATTTTG  
-----TGGTTCTA---CTCAG-ATGCTAAACAA-TGAGTGACTATTTTTCAACCAAATA---TATGTT---A---AA  
GATTTGAATGTTTTAACTAACTGATAGCTGACCTG---AAAA---AGTAATCACAA-TTTTTTCAT-----  
TAGTGTTCATAACCTAGCAAATGTACCA-CCAGGGAGGAATTCACCGTGAATTCAACTCCTGTATCCACCCCCA  
AGACTGCTATGGAATGTCA-GTACACCAAGGTA

>Mouse

CTCAGAATTCCAA--AGCCACGCTCTGTGAGGCAT-GACCATGCCTCCTGTACATTTCAAAGTTTGAAACACATCTT  
AAAAATTACGTAATT-----

-----GGAGCTCA-----CAGTGCCATTCTTTT  
TAAGTTTCCTCCACATTTGCTA-AAAGGAAAATTATGTATCACTTCAG-----GCTACATAG  
-----GATTATATT---CTTTGGATAATAAGGAA-CAGGCAGCTAGTTATCATGTAAACA---TATATC---A---AA  
GATTTGGGAGTTTAAAGTAAACATACAAACGATCTGAAAACAGC-----CACCACAA-GTTTTCTC-----  
TACTGGCCACAACCCAAAAAATGTACAT-CCAGTGTGGAAGTCCAGAAGAGGAGTGGAC-TCCAACAGCCTCT-----  
AGAACTCTTTGGAGTTGAG-G-----TG

>Dog

CTCAGACTTCCAAAGGCGAAGTGTCTACAGGAAAT-AAATGTATCTAATGTACATTTAAAAGTTGAAATACACATC  
AAAATTGATGAATTT-----

-----AAAGTGAGCTTATG---AATTCCAGTCTATTT  
CTGTGCCCTCCAATAATTCTTT--AAAAACAACA-----ACAACAACAACAACAACAACAACAATTG  
-----GCACATTTTCCACTCTGGATGCTAAAGAA-TAAGTGAATATTTTTCAACCAGATA---TATA-----AT  
GATTTCAATGTTTTAAATTAATTGAAAGCTTAC-----AA-----AATTACAATTTTGTAT-----  
TAGTGGTCACAGTCTAGCAAACCTTATAG-TCAGTGAAGAATTCTATAGGGTTGTTAGACTTTGCCATTCTCT-G-----  
GGACTGCTATGGAATGGAACACACACCAAAGTC

>Horse

CTCAGATTTCTATAGGAGAAGCATTCTGT-GGGCAT-AACTATATCT-ATGTGCATTTAAAAATTTGAAACACACACT  
AAAATGTATGCATTT-----

-----AAAAGGAGCTTATG---AATTACAGTCGACTT  
CATTGCCCTGTAATACTTCCTG---ACAAAAAAGC-----ATAA-----ATTACATTG  
-----GCATGTTTTCTATTCTGGATGCTAAAGAA-TGCGTGGATATTTTTTTCAGCCAAATA---TATATT---AAAGAA  
GATTTGGGTGT-----TTAATTGATAGCTGATGTGA---AAAA-----AATCACCATCTT-TTAT-----  
GAGTGGTCACGATCAAGCAAATGTATAG-TCAGCGAGGAATTCTACAGTGGGACTAGACTCCTATCATCCG-C-----  
AGGCTGTTATGGAATGTAG-GCACACTGAGGTA

## Marker L114

>L1PB4\_3'-End

```
-----gaaaggtgggaggggtgggaggggggtgagggatgaga  
aa-----ttacctawtgggtacaatgtacactattcgggtgatg  
gktacactaaaagcccagacttcaccactacgcaatatatccatgtaacaaaactgcacttgtacccccctaaatctat  
aaaaataaaaaaa-----  
-----
```

--

>Human

```
AGGAATGTTGCACTTAGTCTTATCGTGATAACAGAACAATCCTTATAAGTTTCAACAACATCTGC- TTACAAACATGT  
AGGAGGTGAGAACAAGTCCAATTTTT--ATTTTATCTCA--ttacttaatgagtacaatggacattattcaggtgatg  
gacacacttaaagcccagacttcaccactatgaaatatgtctctgtgaggaaattgcacttgtactccttaaatttat  
acaaataaaaaaacag--CAATA--AATA--CATA-AAGTGTCTGTAAAA-TTCAGTGTTCTTGCAGTTGGTTCACA  
GGTCCTATCCGAGCATAACA-AAATTATTTACACAGCTTGTAACGACCTATTATAGATGGTATTAGAAGAATTCTTCT  
AA
```

>Chimp

```
AGGAATGTTGCACTTAGTCTTATCGTGATAGCAGAACAATCCTTATAAGTTTCAACAACATCTGC- TTACAAACATGT  
AGGAGGTGAGAACAAGTCCAATTTTT--ATTTTATCTCA--ttacttaatgagtacaatggacattattcaggtgatg  
gacacacttaaagcccagacttcaccactatgaaatatgtctctgtaaggaaattgcacttgtactccttaaatttat  
acaaataaaaaaacag--CAATA--AATA--CATA-AAGTGTCTGTAAAA-TTCAGTGTTCTATGCAGTTGGTTCACA  
GGTCCTATCCGAGCATAACA-AAATTATTTACACAGCTTGTAACGACCTATTAGAGATGGTATTAGAAGAATTCTTCT  
AA
```

>Orangutan

```
AGGAATGTTGCACTTAGTCTTATCATGATAGCAGAACAATCCTTGTAAGTTTCAACAACATCTGC- TTACATACATGT  
AGGAGGTGAGAACAAGTCCAATTTTT--ATTTTATCTCA--ttacttaatgagtacgatgaacattattcgggtgatg  
gacacacttaaagcccagacttcaccaccatgaaatatgtccctgtaaggaaattgcacttgtactccttaaatttat  
acaaataaaaaaacag--CAATA--AATA--CATA-AAGTGTCTGTAAAA-TTCAGTGTTCTATGCAGTTCGGTTCACA  
GGTCTTATCCGAGCATAACA-AAATTATTTACACAGCTTGTAACGACCTATTATAGATGGTATTAGAATAATTCTTCT  
AA
```

>Baboon

```
AGGAATATTGC-CCTTAGTCTTATTGTGATAACAGAACAATCCTTTTTAAGTTTTCAGCAACATCTGC- TTACATACATGT  
AGGAGGTGAGTACGAGTCCAATTTTT--ATTTTATCTCA--ttacttaatgagtacaatggacattattcaggtgatg  
gatacacttaaagcccagacttctccactatgaaatatgacctgtaagaaaattgtacttttacttcttaaatttgt  
gcagat-aaaaaacag--CCATA--AATA--CATA-AAGTGTCTGTAAAA-TTCAATGTTCTATGCAGTTCGGTTCACA  
GGTCCTATCTGAGCATAACA-AAATTATTTGCACAGCTTGTAATGACCTAGTTTAAAGTGGTACTAGAACAATTCTTCT  
AA
```

>Rhesus

```
AGGAATATTGC-CCTTAGTCTTATTGTGATAACAGAACAATCCTTTTTAAGTTTTCAGCAACATCTGC- TTACATACATGT  
AGGAGGTGAGAACGAGTCCAATTTTT--ATTTTATCTCA--ttacttaatgagtacaatggacattattcaggtgatg  
gatacacttaaagcccagacttctccactatgaaatatgacctgtaagaaaattgtacttttacttcttaaatttgt  
gcagat-aaaaaacag--CCATA--AATA--CATA-AAGTGTCTGTAAAA-TTCAATGTTCTATGCAGTTCGGTTCACA  
GGTCCTATCTGAGCATAACA-AAATTATTTGCACAGCTTGTAATGACCTAGTTTAAAGTGGTACTAGAACAATTCTTCT  
AA
```

>Marmoset

```
AGGTATATTGCACTTTGTCTTATCATGATAGCAGAACAATGCTTGTAAGTTTCAAGGACATCTGC- TTACATACATGT  
AGGAGGTGAGAACAAGTCCAGT-----GTTTATCTCA--ttacttaatgagtcacaatgaacattattcaagtgcta  
gatatacttaaagctcagacttcaccactatgaaatatgtccatgtaagaaaattgcacttgtattccttaaatttat  
gcaaat-aaaaaacag--CAATA--AATA--CATA-AAGTGTCTGTAAAA-TTCAGTGTGCATGCAGTTCGGTTCACA  
GGTCCTATCTGAACATAA----AATTATTTACACAGCTTGTAATGACCTATTATAGATGGTATTAGAATAATTCTTCT  
AA
```

>Tarsier

```
AGGAATATTGCACTTAGTCTTA---TGAGAGCCAAACCATGCTTATAAATTTCAACAATGTCTGCTTTGTGTACATAC  
AGAAGGTGAGAAAAAGCCCAATTTTT--AATTTATCTTA--ttacttactgggtatagtggtgacattattcaggtgatg  
gacacactaaaagcccagacttcaccaccaaccaatgtatccatgtagcaaaattgcatttgcgccccttaaatttat  
acaaat-aaacaaca--CAACAACAATA--AATACAAGTGTCTGTCAACA-TTCAGTGCTCGTGAGGTCAGTTCACA  
GGTCTTATCCAAACATAATA-AAATTATTTACACAGCTTCTAATGACGTATTATAGATGGCATTGTAAAGACTCTTCC
```

AA  
>Bushbaby  
AGGAACACTGCCCTGAGTTTTATTACGATAGCCAAACAATGCCTGTAAGTTTTCAACAACATCTGCTTTCCATGCACAT  
AGAAGGTGCACATAAGCCCAATTTTT-----  
-----  
-----AATTCTTTTCA--TTTA-AAGTATCCTATACAA-TCAAATGCTTATGCAGTCCCTTACCA  
GATCCTTTCTGGACATAATA-AAATTATTTACATAGCTCTGAATGGTGTATCATAGATGGTATTATAGTGATTCTTCT  
AC  
>Mouse\_lemur  
AGGAATATTGCACTTCGTCTCATCGAGATAGCCAAACAATGCATATGAGTTT---CAACATCTGCTTTACATACACAT  
AGAAGGTGAGCAC-AGTCCAATTTTT-----  
-----  
-----AATTTATTTCA--TTGA-AAGTATCCTGTAAGA-TTCAGTGCTCATGCAGTCAGTTTACA  
GGTCCTATCTGGACATAATA-AAATTATTGATATAGCTTCAAATGGCATAGTATAGATGGTAGTGTAAATGATTCTTCT  
--  
>Tree\_shrew  
AGGACGAATGCACTTAGTAGTCAAATGGTAGCCCAATAATGGTTACGAGTTT---CAATATCTACTTTACATACACCC  
GGAAGGTAAAGAAAACGTCCAATTTTT-----  
-----  
-----AATTAATCCCA--TTT-----AAAA-TCC-----TAGTTCAGA  
GATTATATCTGGGCATAAAA-AACTTTTTTACATAGC-----ACAGTAATGATTCTCTCT  
GA  
>Guinea\_pig  
GAAAATATTGTACTGCATCTAACCAGGATGACAAAACAGTGCT-----GTGTGCAGATGTC-----TGCACACTC  
AAAAGGTGAGAATAAGCCAAAATTTTT-----  
-----  
-----AATCTC-CATA-----AAGAGCTTTGTAAAA-TTCAGT-ATTCTTGATCAGTGTGAA  
GAGCCTAGCTGGGTACAACA-CAATTAGTTGCACAGCTTCTAATGCCATATTATAGATGGTATTGCAGTGATTTGCC  
AA  
>Dog  
AGTAATATCGCACTTAACCTAATCATGATAGTCAAATGGTGTGAGAAGTTTTGACAACATCTGCTTTACAAGTATAT  
GGAAGGCAAAGACAACCCCAATTTTT-----  
-----  
-----AGTTTATCTGA--TTTA-ATGTGTTCTATAAACTTCAGTGTTACATCATCGGTTTACA  
GACCCTCTCTGAACATAATA-AAGTTATTTACACAGCTGCTGATGGCATAGTCGAGGTAGAATTATTAGGATTCTCCC  
AA  
>Horse  
AGTAACATTGCACTTAGTCTAGTCATGACAGTCAAACAATGCTTAGAAGTTTTCAATTGTGTCTGCTTTACACATATAT  
AGAGGATGAGGACAAACCTAAGTTTT-----  
-----  
-----AATTTATCTCT--TTTA-ATGTGTTCTGTAAAAATTCAATGTTACACCAT-----  
---CCTATCTGAACATGATATAAGTTATTTACACAGCCGCTAATGGCATATTATAGTTGGCATTGTTCTGATTCTCCC  
AA

## Marker L122

>L1PB4\_3'-End

-----tagaactaccattcgatccagcaatcccactactgggtatctacccaaaggaaaagaatcattat  
atcaaaaagatacctgcact-----cgtatgtttatcgcagcactattcacaatagcaaagat  
atggaatcaacctaagtgtccatcaatggatgactggataaagaaaatgtggtatatatacaccatggaatactactc  
agccataaaaaagaat-----  
-----  
-----  
-----  
-----  
-----  
-----  
-----  
-----  
-----  
-----  
-----

-----gaaatcatgtcttttg---cagcaacatggatggaactggaggccattatcctaagtgaaa  
taactcagaaacagaaagtcaaataccgcatgttctcacttataagtgggagctaaacaatgkgtacacatggacata  
cagagtggaataatagacactggagactcmgaaagggtgggaggggtgggagggggg--tgagggatgagaaattaccta  
wtgggtacaatgtacactattcgggtgatggkta-----cactaaaagcccagacttcaccactacgcaatataccc  
atgtaacaaaactgcacttgtaccccctaataatctataaaaaataaaaaa-----  
-----

>Human

AGTTTCATGAGTTCACATCAGAACCAAATGAATGTTTTCT----ATGTTAAGAAAAA-TATCAATTCCTC---TTTC  
TCAGATTCAATGTCATGAAAGCTG---TTAAATACT----catagacttatctcagcacaattcacaatagcaaagat  
atggaatcaacctaagtgttcataaatggaggattggataaagaaaatgtattacatacataccccggaatagtattc  
agctataaagacgaat-----  
-----  
-----  
-----  
-----  
-----  
-----  
-----  
-----  
-----  
-----  
-----

-----gaaatcatgtcttctgtaaaagcaacatgggtggaactggaggcaattatcttaattgaaa  
caactcagaaacacaaagtcaaacatcacatcatctcacttctaagtgggagctaaataatgtgtacagttggac-ta  
gaatgtggaataatcaacattggagaatcagaag-aagggagg--gtggaggaagg-taaggggtgataaatgatgta  
atagatacaatgta--ttatcatgggtgacggtaatgggtatgctaaaagccctgacttcaccactgcacaatataccc  
ctgtaacaaaactgtaattgtatccattaaatttatacaaaataa--GAAAAA-TACT----TGGTGTTCATGTTAT  
TTACTTGGGGGAAATATAGTCTATGGTATGTAAATATTCTGAAAGTTTTTC-ATTGA

>Chimp

AGTTTCATGAGTTCACATCAGAACCAAATGAATGTTTTCT----ATGTTAAGAAAAA-TATCAATTCCTT-----TT  
TCAGATTCAATGTCATGAAAGCTG---TTAAATACT----catagacttatctcagcacaattcacaatagcaaagat  
atggaatcaacctaagtgttcataaatggaggattggataaagaaaatgtattacctacatacccagaatagtgttc  
agctataaagacgaat-----  
-----  
-----  
-----  
-----  
-----  
-----  
-----  
-----  
-----  
-----  
-----

-----gaaatcatgtcttttgtaaaagcaacatgggtggaactggaggcaattatcttaattgaaa



caactcagaaacagaaagtcaaacgtcacatcatctcacttctaagtgggagctaaataatgtgtacagttggac-ta  
gaatgtggaataatcaacattggagaatcagaag-aagggagg--gtggaggaagg-taaggggtgataaatgatgta  
atagatacaatgta--ttatcatggtgatggtaaatggttatgctaaaagccctgacttcaccactacacaatatatcc  
ctgtaacaaaactgtaattgtatccattaaatttatacaataa---GAAAAA-TACT----TGGTGTTCATGTTAT  
TTACTTGGGGGAAATATAGTCTATGGTATGTAAATATTCTGAAACTTTTC-ATTGA

>Orangutan

AGTTTCATAAGTTCACATCAGAACAAAATGAATGTTTTCTTCTATGTAAAGAAAA-TGTCAATTCCTC---TTTT  
TCAGAT-CAATGTCATAAAGGCTG---TTAAATACT----catatactta-----gcacaattcacaatagcaaagat  
atggaatcaatctaagtgttcataaatgaatgattgaataaagaaaatgtattacatatgtaccctggaatagtattc  
agctataaagaagaac-----

-----gaaatcatgtcttttgtaaaagcaacatgggtggaactggaggcaattatcttaactgaaa  
caactcagaaacagaaagtcaaacgtcacatcatctcacttctaagtgggagctaaataatgtgtacacttggac-ta  
gaatgtggaataatcaacattggaaaatcagaag-gtgggagg--gtggaggaagg-taagggatgataaatgatgta  
atagatacaatgtacattgttatggtgatggtaaatggttatgataaaaagccctgacttcaccactacacaatatatcc  
ctgtaacaaaactgtaattgtatccattaaatttatacaataa---GAAAAA-TACT----TGATGTTTCGTGTTAT  
TTACTTGGGGGAAATATAGTCTATGGTATGTAAATATTCTGAAAGTTTTTC-ATTGA

> Baboon

AGTTTCATAAGTTCACATCAGAAGCAAATGAATGTTTTCT----ATGTTAAGAAAA-TGTCAATTCCTC---TTTT  
TCAGAT-CAATGTCATAAAGCTA---TTAAATACT----aatatacttatatcagcacaattcacaatagcaaagct  
atggaatcaacctaatgtgttcaa---ggatgattggataaagaaaatgtatgacatacacacactggaatagtattc  
agctataaagaagaat-----

-----ggaatcatgtcttttgtaaaagcaacatggatggaaatggagacaattatcttaattgaaa  
caactcagaaacagaaagtcgaatgtcacatgatctcacttataagtgggagctaaataatgtgtacacttggac-ta  
gaatgtggaatgatcaacattggcgaatcagaag-gtgggagg--gtgggggaagggtgaagggatgataagtgggtga  
atagatgcaatgtacattatttagggatggtaaatggttatgctaaaagccctgacttcagcactacacaatatatca  
ctgtaacaaaactgtaatttatccattaagtttatacaataa---GAAAAA-TACT----TGATGTTTCATGTTAT  
TTACTTGGGGGAAATATAGTCTATGACACGTAAATACTCTGAAAGTTTTCCATTGA

> Rhesus

AGTTTCATAAGTTCACATCAGAAGCAAATGAATGTTTTCT----ATGTTAAGAAAA-TGTCAATTCCTC---TTTT  
TCAGAT-CAATGTCATAAAGCTA---TTAAATACT----aatatacttatatcagcacaattcacaatagcaaagct  
acggaatcaacctaatgtgttcataaatggatgattggataaagaaaatgtatgacatacacacactggaatagtattc  
agctataaagaagaat-----

-----  
-----  
-----gaaatcatgtccttttgtaaaagcaacatggatggaaatggagacaattatccttaattgaaa  
caactcagaaacagaaagtcgaacgtcacatgatctcacttataagtgggagctaaataatgtgtacacttggaac-ta  
gaatgtggaatgatcaacactggcgaatcagaag-gtggggagg--gtgggggaagg-taagggatgataagtgggtgta  
atagatgcaatgtacattatttagggatggttaagtgggttatgctaaaagccctgacttcagcactacacaatatatca  
ctgtaacaaaactgtaattatatccattaagtttacacaaaataa---GAAAAA-TACT---TGATGTTTCATGTTAT  
TTACTTGGGGGAAATATAGTCTATGATACGTAAATATTCTGAAAGTTTCC-ATTGA  
>Marmoset  
AGTTTTATAAATTCACGTCGGAACCAAATGAATGTTTTCTCTTCTATGTCAAGAAAAA-TGCCAATTCCTC--TTTTT  
TCAGAT-CACTGTCATAAAAAGCTA---TTAAATACT----catatacttatctaagcacaattcaciaa-ggcaaagat  
atggaatcaaccttaagtgttcataaatagactactggataaaggaaagggtgttacacacacacactggaatactatac  
agctataaagaagaatATTCTTCTTTTTTTTTTAAATTATACTTTAAAGTTCTGGGCTACATGTGCGGAACATGCAGGTTTTG  
TTATGTAGGTATACACATGGCATGATTGTTTGTCTGCATCGATGCCCTGTGCATGTACCTTAGGTATTTCTCCTAATGT  
TAGCCCCACCGGATCCCCTCACCTCCTGCTATCCCTCCCCTAACCCCTCCCATCCCCTAACAGGCCCTGGTTTGTGAT  
GTTCCCCTCCCTGTATCCATGTGTTCTCATTGTTCAACATCCACTTATGAGTAAGACTATGTGGTGTGGTTGTCTG  
TTCTTGTGTCACTTTTCTGAGAATGATGGTTTTCCAGATTCCATCCATGTCCCTGCAAAGAACATGAACCCATCCCTTTT  
TATAGCTGCATAGTACTCCATGGCATATATGTGCCACATTTTTCTTTATCCAGTCTATCATTAGTGGGCATTTGGGTTG  
ATTCCAAGTCTTTGCTATTATAAACAATACCACAATAAACATATGTGTGCATGTGTCTTTATAAATTGAATGTTTTATA  
ATCCTTTGGGCATACACCCAGTAATGGGATTGCTGGATCAAATGGAATTAATTTCTAGATCCTTGAGGAATCGCCC  
CACTATCTTCCACAATGGTTGAACTAATTTACTCTCCACCAACAGTGTAAAGTAAAGTGTTCCTATTTCTCCACATC  
CTCTCCAGCATCTGTTGTCTCCAGATGTTTTAATGATTGTCATTCTAAGTGGCGTGAGATGGTATCTCAATGTGGTTT  
TGATTTGCATTTCTCTAgaaatcatgtccttttgtaaaagcaacatggatggaaactggaggcaattccttaattgaaa  
caactca--aacagaaagtcaaaagtcacatgatctcactgataagtgggagctacataatgtgtacacttggaac-ta  
gaatgtggaatcatcaacattagagaatcagaag-gtggggagg--gtgggggagg--taagggatgataagttactta  
atagatacaatgtacattattattgtgatggtaagtgggttatgctaaaagaccaacttcaccactacacaatatatcc  
atgtaacaaaactgtatttgtatccatcaagtgtatacaaaaataa---GAAACA-TATT---TGATGTTTCATGTGAT  
TTACTTTGGGGGAAATATAGTCTATGGTATCTAAGTATTCTGAAGGTTT-C-ATTGA  
>Tarsier  
AATTTTATAAATTCATATCAGAGTTTAAATGAATATTTCTATTCTATGTTAAGAAAAA-TATCAGTTCTC---TTCT  
ATAAAT----GTCATAAAAAGCTA---TATAAATAT---ttgtgtgtttattgcaagttctattcccaataacaaagat  
atggaatcagtcataatgtccatcaataaatgactggataaagaaaatgtagtatacatacacaatagactacaattc  
agccataaaaaagaat-----  
-----  
-----  
-----  
-----  
-----  
-----  
-----  
-----  
-----  
-----gaaatcatatatttgtca----caacatggatggaaactggagaccattgttttaggtaaaa  
caactcagaaacagaaagtcaaataaccgcatattctcatttataaatggaa-ctaaataagatgcacacaagaacaca  
gaatgtgtagtaccagacattggagactttaaagtgtgggaagaggtataggaag--taagttatgagaaattactga  
atgggtacagtgacatttttgggg---ggtaattgtt-----gccctgatttcacctcaacacaatatatcc  
atgtaaaaaactgcacttgtatcccctaaatttaacaaaataa---AACAAAATATT----TCATGTT-----AT  
TTAATTAGGGGAAGTACACTTTATGGTAAATAAATATTTTTGAATGTTTTTA-ATTGA  
>Bushbaby  
CATTTTTATGAACTCACATTAGAGCTGAGTCAATGTTTTCTGTTCTTCTTAAGAAAAAATCTCAGTTGCTCATTCTTCT  
GAGGAT-CAATGCTGTAAAAGTTA-----  
-----  
-----  
-----  
-----  
-----

-----TATGAG-TACT-----TTATCTTTCATGTTAT  
TTAAATGGGGGAAATATAATCTATGGTAAATGAATATTCTG----TTTCG-ACTGA

>Mouse\_lemur

AATTTTCAGAAACTCATGGTAGAGCTGAAAGAATGTTTTCTATTCCATCTTAAGAAAAA-TGTCAA--ATC--TTTT  
GCAGGC-CAATGTCATAAAAGCTA-----

-----AAAGAA-TAAT-----TGATCTTTCATGTTAT  
TTATTTGGGGGAAATATAATCTATGATAACTAAATAT-----

>Tree\_shrew

-----TGATGAACTTGCATTATATTCAAATGAATGTTTTCTATTCTATCTTGAAAACAC-TGTCAGTTCCTCTATTGG  
GCAGCT-AAATATCAT-AAAGCTA-----

-----TATAAA-TCCT-----TGATGTCTTATGTATT  
TTG-----AATACAATCTATGGCAACTAAATATTCTGAATGTTTAT-ATTAA

>Guinea\_pig

AGTTTTCATGAACTCACATAGGATTCTAGTGAATGTTTTCTATTTTATGTTAAGAAAAA-TGTGAATTTCTCATCTTTT  
GAATGT-CAGT-GGATAACAGCTA-----



## Marker M02

>MSTB1

```
-----tgtccttagtccatttttgtgt
tgctataaaggaatacctgaggctgggtaattttataaagaaaagaggtttatgttggtcacgggtctgcaggctgtac
aagaagcatggcgccagcatctgcttctggtagggcctcaggctgcttcactcatggcggaaggtgaaggggagcc
ggcgtgtgcagagatcacatggcgagagaggaagcaagagagagagggg----aggtgccaggctctttttaacaa
ccagctctcgcggaactaatagagtgagaactcactcatccccac-cccgagggaggg-cattaatctattcatgag
ggatccgcccccatgacccaaacacctcccattaggccccacctccaacactggggatcaaatttcaacatgaggtt
ggaggggacaaac-----atccaaactatagca-----
```

>Human

```
TCCTTCACAAAAATTTAAGATCTTGATCTATAAATTTATACTCTAAACTTTTACATGAATCAGAACTGTGA-AAAA-
--TACTCTGGATTCTATAGTTATCTTCTAGCAACCAGTATGACTCC---CAAAT---tgtccttagtccatttatg-t
tgtgtgtaaaggaatacctgctggctagataaatttacaagaaaagaggtttatgttggtctgtgattctgcaggctatgc
aagaagcatggtagcagcatctgcattta-tgagg-tctcaagttgcttcactcatggcagaggggtgaaagggacc
agtgtgtgaagagatcacatggcaagaggg-----agcaggcctaagattcccggctcttttcaacaa
ccacttctgtgggaatagtga--aaa-----ctcact--cactcctgagagaatttcatcaagccatccacgag
ggatccacttccgtagcccaaca-----cca-----tgggcatcaaatttcaacatggaactt
ggtgaagcaaaacataccatgcaagccatggca---CAAAT---AATTACCCTAAAACACAATATATTCACCATGT
TATAATTGGAAAAA-TCAATGTCTACATCGTAGGTAGAATTTTGTTAATTATATAGTTTCC-TTACTCATGCCATTC
T
```

>Chimp

```
TCCTTCACAAAAATTTAAGATCTTGATCTATAAATTTATACTCTAAACTTTTACATGAATCAGAACTGTGA-AAAA-
--TACTCTGGATTCTATAGTTATCTTCTAGCAACCAATATGACTCC---CAAAT---tttccttagtccatttatg-t
tgtgtgtaaaggattacctgctggctagataaatttacaagaaaagaggtttatgttggtctgtgattctgcaggctgtgc
aagaagcatggtagcagcatctgcattta-tgagg-tctcaagttgcttcactcatggcagaagggcgaagggacc
agtgtgtgaagagatcacatggcaagaggg-----agcaggcctaagattcccggctcttttcaacaa
ccacttctgtgggaatagtga--aaa-----ctcact--cactcccagagagaatttcatcaagccatccacgag
ggatccacttccatagcccaaca-----cca-----tgggcatcaaatttcaacatggaactt
ggtgaagcaaaacataccatgcaagccgtaggca---CAAAT---AATTACCCTAAAACACAATATATTCACCATGT
TATAATTGGAAAAA-TCAATGTCTACATCGTAGGTAGAATTTTGTTAATTATATAGTTTCC-TTACTCATGCCATTC
T
```

>Orangutan

```
TCCTTCACAAAAATTTAAGATCTTGATCTATAAATTTATACTCTAAACTTTTACATGAATCAGAACTGTGA-AAAA-
--TACTCTGGATTCTATAGTTATCTTCTAGCAACCAATATGACTCC---CAAAT---tgtccttagtccatttatg-t
tgtgtgtaaaggaatacctgctggctagataaatttacaagaaaagaggtttatgttggtcgtgattctgcagggtgtgc
aagaagcatggtagcagcatctgcattta-tgagg-tctcaagttgcttcactcatggcagaagggcgaagggacc
agtgtgtgaagagatcacatggcaagaggg-----agcaggcctaagattccaggctcttttcaacaa
ccacttctgtgggaatagtga--aaa-----ctcact--cactcccagagagaattacatcaagccattcagag
ggatccacttccataacccaaacaactcccaccaggctcaacctccatcactgggcatcaaatttcaacatggaactt
ggtgaagcaaaacataccatgcaaacacagca---CAAAT---AATTACCCTAAAACACAATATATTCACCATGT
TATAATTGGAAAAA-TCAATGTCTACATCGTAGGTAGAATTTTGTTAATTATATAGTTTCC-TTACTCATGCCATTC
T
```

>Baboon

```
TCCTTCACAAAAATTTAAGATTTTGGATCTATAAATTTGTAAGTCTAAACTTTTACATGAATCAGAACTGTGA-AAAA-
--TACTCTGGATTCTATAGTTATCTTCTAGCAACAAATATGACTCC---CAAAT---tgtccttagtccacttatg-t
tgtgtgtaaaggactaccgctggctagataaatttacaagaaaagaggtttatgttggtcctggttctgcaggctgtgc
aagaagaatggtagcagcatctgcattta-tgagggctcaagttgcttcactcatggcagaagggcgaagggacc
agtgtgtgaagggatcacgtaggcaaaaggg-----agcaggcctaagcttccaggctcttttcaacaa
ccacttctgttaggaatagcga--aaa-----ctcact--cactcctgagataattacatcaagccattcatgag
ggatccacttccataacccaaacacttcccaccatgctccacctccatcactgtacatcaaatttcaacatggaactt
ggtgaagcaaaacataccatgcaaacatggcg---CAAAT---AATTACCCTAAAACACAATATATTCACCATGT
TATAGTTGGAAAAA-TCAATGTCTACATCGTAGGTAGAATTTTGTTAATTATATAGTTTCC-TTACTCATGCCATTC
T
```



>Dog

TTGTCACCAAAA-----TCGTAATCTATACATTCTACCC-----TTACTTAAACCAGAACTGTTA-AAAAA  
AATACTTTGGATCCTGTAGTTATCTTTTAAAATCCAGCACAATTCC-----

-----  
-----  
-----  
-----  
-----

-----CAAAT---AATTACCCAAAAGCATGATATATTAACCTTTT  
GAATAAGAAAAAAAAAATCAGCATCCACACACTAGGTGGAATTTTGTTATTACATA-TTTCCGCTACTCCTGATATTC

T





-----ACCAA  
GCTCCTGCTCTTCATCACTGGCCAGT-CCAGATTC---CAGG-----  
A---tgctgtggtttgaatatg-----gtttgtttggccctgccaagtctcatattaaaatttgatccccattgtg  
ggaggttaaggttgcataggggtgggaggcatttggatcctgggggttaggttgggtccctcatgaacgtcatgggtgctt  
ttctcatgggagt-----gtgagttc-ttacttttgg-ttcccctgaaagctgggttgctaaaaagagcctggc  
gcctcct-----cctctccctcttgcctcctctcttgcctctgacttctgc-----  
-----ataggctggctcctcctcaactactgccgtgagtggaagcagcctgaagc-ctcaccagaagcaaatgtgggc  
gccatgctttttgtacagcctgcagaacca-----aataaacctcttt-tatttacaagttaccagcctcaggta  
ttgctttacagaaacacaaa-cagact--gaca---CAGGA---ATA-----GAATAATTTCAATGAATAAATAAA  
-TAGAATCTTATAACCAAATCATAGAAGTGGCAGCTCCC-TTTTAAA-----AC-TTA--GTGTTCTTTCAAACAT  
ATT

>Orangutan

TC---CTCTGCTGCAGGTCTACTGAAACCACTTGTGCCTTATCAGGTTG-----GTGCCCAAATTTCTTTCCCTCTTCT  
TCCATTACATCCCCATCTTGCCTACCTGGTAAACTCCCAGTTGCTCTTCTAGTCTCAACTCAAGTGCTGACTTCTCT  
AAGAGACTGTCT-TAAACTCCTCATAAGACAAAGTCGGATAACTCCTTCTTCAAGCTAAAATAGTATATTCTATTG  
ATTATGTGCCA-CATTGGCATTCTGAACACCTGCCTAGAGGTCTGGGTGC-----CCC-GTCAC  
CTGGAAACTCATGTTGTATCCATTTCTAAACTTTTAGGGGCTGAAGCTACAACAA-----TCAATAA  
GGATAGGCACTC--TGTTTACCT-----AACTACAATATTTTT-----CTCAATCTTTATAATACACAACG  
CTACAGTCTTTT-----TTTGTAGTAAACTAAATCCAAAGAAATAAGTGGTAAAC--AGC  
TGTGAG-----  
-----  
-----ACCAA

ACTCCTGCTCTTCATCACTGGCCAGTCCCAGATTC---CAGG-----  
A---tgctgtggtttgaatatg-----gtttgtttggccctgccaagtctcatattttaaatttgatccccattgtt  
ggaggttaaggttgcataggggtgggaggcatttggatcctgggggtgaggtcgggtccctcatgaacgtcatgggtgcca  
ttctcatgagcagt-----gtgagttcgttacttggg-ttcccctgaaaactgggttgctaaaaagagcctggc  
gcctcct-----cctctccctcttgcctcctctcttgcctctgacttctgc-----  
-----ataggctggctcctcctcaactactgccatgagtggaagcagcctgaagc-ctcatcagaagcaaatgctgggc  
accatgctttttgtacagcctgcagaacca-----aataaacctcttt-tatttataagttaccagcctcaggta  
ttgctttacagaaacacaaa-cagact--gaca---CAGGA---ATA-----GAATAATTTCAATGAATAAATAAA  
-TTGAATCTTATAACCAAATCATAGAAGTGGCAACTCCCTTTTTTAAA-----AC-TTA--GTGTTCTTTCAAACAT  
ATT

> Baboon

TC---CTCTGCTGCAGGTCTACTG-AACCACTTGTG-CCTATCAGGTT-----GTG-CCAAATTTCTTTCCCTCTTCT  
TCCATTACATTTCCCATCTTGCCTACCTGGTAAACCCCACTTGTCTCTTCTAGTCTCAACTCAAGTGCTGACTTCTCT  
AAGAAACAGTCT-TAGACTCCGCGTAAGACAAAGTCAGATAACCCCTTCTTCAAGTTGAAATGGTATATTCTATTG  
ACTATGTGCCA-TGTTGG-ATTCTGAACACCCGCCTAGAGGTCTGGGTGC-----CCC-GTCAC  
CTGGAAACCCGTGTTGTATCCATTTCTAAACTTTTAGGGGCTGAAGCTACCACAA-----CCGATAA  
GGATAGGCACTC--TGTTTACCC-----ACGTGCAAT-----TCATTGTAATACACAATG  
ATACAGTCTTTT-----TTTGTAGTAAACTAAATGCAAAGAAATAAGTGGTAAACTGAGC  
TGTGAG-----  
-----  
-----ACCAA

GCTCCGGCTCTTCATCACCGGCCAGT-CCAGAGTC---CAGG-----  
A---tgctgtggtttggaatatg-----gttcggtttggccctgccaatctcatagtaaaaatttgacctccattgtt  
ggaagtaaggttgcataggggtgggaggcatttggatcctgggagggtcgggtccctcatgaacgtcgtgatgcca  
ttctcacgggagt-----gtgagttc-ttacttttgg-ttccctctgaaaactgggttctaaaaagagcctggc  
gcctcct-----cctctccctcttgcctcctctctctgctgctgacttctgc-----  
-----ataggctggctcctcctcaactactgccatgattggaagcagctctgaaac-ctcatcagaagcaaatgctgggc  
accatgctttttgtacagctctgcagaacca-----aataaacctcttt-tatttgtaagttaccagcctcaggta  
ttgctttacagaaac-----a-cagact--gaca---CAGGA---CCA-----GAACAATTTCAATGAATAAATAAA  
TTTGAATCTTATAACTAAATCATAGAAGTGGCAGCTCCC-TTTTAAA-----AC-TTAAGGTGTTTCAAAAAC--  
ATT

>Rhesus

TC---CTCTGCTGCAGGTCTACTG-AACCACTTGTG-CTTATCAGGTT-----GTG-CCAAATTATTTCCCTCTTCT  
TCCATTACATTCCCATCTTGCCTACCTGGTAAACCCCACTTGTCTTTCTAGTCTCAACTCAAGTGCTGACTTCTCT  
AAGAAACAGTCT-TAGACTCCGCGTAAGACTAAGTCAGATAACCCCTTCTTCAAGTTAAAATGGTATATTCCTATTTG  
ACTATGTGCCA-TGTTGG-ATTCTGAACACCCGCCTAGAGGTCTGGGTGC-----CCC-GTCAC  
CTGGAACCCATGTTGTATCCATTTCTAAACTTTTAGGGGCTGAAGCTACCACAA-----TCGATAA  
GGATAGGCACTC--TGTTTACCC-----ACGTGCAATATTTTT-----CTCATTATTGTAATACACAATG  
ATACAGTCTTTT-----TTTGTAGTAAAACTAAATGCAAAGAAATAAGTGGTAAAACCTGAGC  
CATGAG-----

-----TCCAAA  
GCTCCGGCTCTTCATCACCGGCCAGT-CCAGAGTC---CAGG-----  
A---tgctgtggttggaaatag-----gtttgtttggccctgccaaatctcatagtaaaatttgacctcattggt  
ggaggtaagggttgcatagggtgggaggcatttggatcctgggagggaggctcgggtccctcatgaacgtcatggtgcca  
ttctcacgggagt-----gtgaattc-ttacttttgg-tttccctgaaaactgggtgctaaaaagagcctggc  
gcctcct-----cctctcctcttcttctcctctcctgcggtctgacttctgc-----  
-----ataggctggctcctcctcaactactgccatgattggaagcagctctgaaac-ctcatcggaagcaaatgcgggc  
accatgctttttgtacagtctgcagaacca-----aataaacctcttt-tatttgaagttaccagcctcaggta  
ttgctttacagaaac----a-cagact--gaca---CAGGA---CCA-----GAACAATTTCAATGAATAAATAAA  
TTTGAATCTTATAACTAAATCATAGAAGTGGCAGCTCCC-TTTTAAA-----AC-TTAAGGTGTTTCATTTCAAAAC--  
ATT

>Marmoset

TCTCTCTTTCTGCAGGTCTACTG-AACCACTTGTG-CTTATCAGGTT-----GTG-ACAAATTATTTCCCTCTTCT  
TTCATTACATCCCATCTTGCCTACCTGGTAAATCCCAACTTGTCTTTCTAGTCTCAACTCAAGTGCTGACTTCTCT  
AAGAAACTGTCT-TAGACTCCTCATGAGACAAAGTCAAGTAACCCCTTCTTCAAGCTAAAATAGTATATTCCTATTTG  
ATTATGTGTCA-TGCTGG-ATTCTGAACACCTGCCTAGAGGTCTGGGCAC-----TTT-GTCAC  
CTGGAACCCATGTTGTATTCAATTTCTAAATTTTTAGGGGCTGAAGCTACAATA-----TTAATAA  
GTATAGGTGCTC--TATTTATTT-----AAGTACAATAT-----TTATAATACACAATG  
ATACAATCCTTT-----TTGGTAGTCAAACCAAATCCTAAGAAATAAGTGGCAAAACTGATC  
TGTGAG-----

-----ATCAAA  
GCCCCTGCTCTTCATCA-TGGCCAGT-CCAGATTC---CAGG-----  
A---tgctgtggttgaatagtttttttttttttttggccctgccaagtcttatactgagattgcatctccattggt  
ggaagtaagggttgcatagggtgggaggcatttggaccctaggggtgggatcagggtcc--catgtatgtcatagtaacca  
ttctcatg-gagt-----gtgagttc-ttacttttgg-ttcccctgaaaactggctgctgcaaagaacctggt  
gcctcct-----cctctcctctgttcttcttcttcttgcacatctgacttctgc-----  
-----acaggctggctcctcgtcatctactgcca-----tgaagt-ctcaccaaaagcaaagtc-agc  
atcatgcttttgggtacagtctgcagaacca-----aatacacttcttt-tctttttaagttaccagcctcagtta  
ttcctttacagaaacacaaa-cagact--gaca---CAGAA---CTAAATGAATGAATATTTTCGATGAATAAATCAA  
TTTGATTTTACAGACAAATCATAGAAGTGGCAGCTCCC-TTTTAAA-----CC-TTGA-GTGCTCACTTCAAAACGT  
ATC

>Tarsier

TCTCCCTGTGCTATAGCTGGACTA-AACTATTTGTG-TTTATCCCACTA-----GTG-CCAAATTCCTTCC-----  
-----TCATTTCCCCAGCTACCCTACTTGGTAAACCCCTTACTTGTCTTTCAAGTCTCAACTCAAGTGCTGCTTTCTCT  
CAGAAACTGTCT-TAGACTCCTCATAGGACAAAGT-AGGTAACCCCTTCTTGAAGTTAAAGTAGTATATCCCTGTTTT  
ACCATGTGTCA-GGTTGT-GTTCTGAACACATGCCTAGAGACCTGCCTAT-----TC---TCAT  
CTGGGAACCTCATGTTGTAGCCATTACTAAACATTTAGGGGCAGAGACCATTATAA-----TCAATAA  
TGATAGGCACTCTTTGTTTTTCT-----ATGTGTGATATTTTT-----CTCAGTCTTTATAAAAAACAATG  
ATATAGGTTTTTT-----TGTTTGTGTTTTTTCAGTAAAACTAAATCAAAGAAACAGG-GGCAAAGCTGGGC  
AGTAAAACCAACCCCTTTTTTTTTCAGGCCTCCCTTTGGGAGGCCAAGGTGAGAGAAGTGCCTGAGGCCACGGGTTTTGA  
GACCAGCCTGGGCAACTTGGCGAGACCTCATATCTACAATAAATCAAGAAAAATTAGCTGAGTGTGATAGTGCATGCC  
TGTAGTTCCAGCTACTTGGAAAGGTTGAGGTGGAAGGATGGCCTGAGCCCAGCAGGTCAAGACTGCGGTGGTTGTGAGC  
ATGCCACTGCACTCCAGCTTGAAGTACAGAGTGAAGTCTGACTCAAAAAGCAAAAAACAACAAAACAAAACACCAA  
GCCATGCCCTTCATCATTGGCCAGA-CAAGCTTC---CAGG-----



ATCATGCATCA-GACTGT-ACACTGAACACCTGCTATGGGGTCTGGCTGC-----CCCAATAGC  
CTGGGAACTCGTGG-GTATTCATTCTACATTCCCAGGGCCTGAGTGT-TTATAA-----TCAATTG  
TGTTAGGCACTC--TATCTCTCTCTCCATATGCAGAATTTTTCTTAGTTTTTCCTTAGTCTTTATAATAAACTATG  
ATACAGTCATTA-----CTATCCTTATTTTTGTAATAGAACTACATCCTGAAAAATGGGCAGCAAAGCTAGGC  
TTTGAA-----  
-----  
-----ACCAAG  
GTCTATACTCTTGACCATTAAACAGA-GTAGCTTT-----  
-----  
-----  
-----  
-----  
-----  
-----  
-----  
-----CAGAG---CGA-----GAATAGTTT-----TACA  
TTCTAGTCTTGTGACCAAATCATAGAAGCTAAAATGACA-TTTTAAATAATGAT-TTT--TTTTTAATTTTCAAACAT  
ATA

## Marker M12

>MSTB

```
-----tgatatggttt-ggatggttgcctcc
tccaaatctcatgttgaaatgtgatccccagtggtggaggtggggcctgg-----
-tgggaggtggttgatcatggggcgatccctcatgaatggcttggcgccatccccttggatgatgagtgagttctc
gctctgttagttcacgagatctggttgtttaaagagntggcacctcccc-ctctctctcttgcctccgctctc
gccatgtgacgtgctgctcccccttgccttctgccatgattgnaag-----
-----cttctgagggcctcaccagaagccgagc
agatgccggcgccatgcttctgtacagcctgcagaaccgtgagccaattaaacctc-----ttttctttataaatta
cc-----cagcctcaggtatttctttatagcaacgcaagaacggactaacaca-----
```

>Human

```
TA----CAACTTGGGGTGAGGTG----TGGGCCTGTCCC-ACCAAGGTACTCATCTCTAAGAGGGCAAGAATGGACAG
TGTCATGACCCAGCAGCTCATATTTGGAAAAG---GTTCT--tgatatggttt-ggatatttgcctcc
tccaaatctcatgtgaaatgtg-----ttggcgggtggggcctgg-----
-tgggaggtgctctgggttatgggtgacccctggatagcttgggtgcagctctcacggatcatgagaggcctctc
cgtctattagctcatgctaggcctgggtgtttaaagaagcatggtgc---cccttccctctctcttctgtctgcctc
accttgtga--tgctgctccccctctgctct-ccaccatgagtggaag-----
-----ctgcctgaggcctccaaaga-----agc
agatgctggtgccatgcttcccgtacagcctgcagaaccgtgagccaaatcaacctc-----ttttctttataaatta
cc-----cagccttaggtcttctttagagcaatgcaaaa-tggaccaggaca---GTTCC---CT
AGTTGAAAAGGTAAGCTC-ATTTAAGCATGGGTCTCACTTTTGGCAGGGGTACTGGTGGTAGGGAGATGGCAGAGGGG
TGTCAAAACCTTCAGGCCATGATGGAATTTGAATGACTAGTGTCCCA
```

>Chimp

```
CA----CAACTTGGGGTGAAGTG----TGGGCCTGTCCC-ACCAAGGTACTCATCTCTAAGAGGGCAAGAATGGAAAAG
TGTCATGACCCAGTATACAGCTCATATTTGGAAAAG---GTTCT--tgatatggttt-ggatatttgcctcc
tccaaatctcatgtgaaatgtg-----ttggcgggtggggcctgg-----
-tgggaggtgctctgggttatgggtgacccctggatagcttgggtgcagctctcacggatcatgagaggcctctc
cgtctattagctcatgctaggcctggctgtttaaagaagcatggtgc---cccttccctctctcttctgtctgcctc
accttgtga--tgctgctccccctctgctct-ccaccatgagtagaag-----
-----ctgcctgaggcctccaaaga-----agc
agatgctggtgccatgcttcccgtacagcctgcagaaccatgagccaaatcaacctc-----ttttctttataaatta
cc-----cagccttaggtcttctttagagcaatgcaaaa-tggaccaggaca---GTTCC---CT
AGTTGAAAAGGTAAGCTC-ATTTAAGCATGGGTCTCACTTTTGGCAGGGGTACTGGTGGTAGGGAGATGGCAGAGGGG
TGTCAAAACCTTCAGGCCATGATGGAATTTGAGTACTAGTGTCCCA
```

>Orangutan

```
CATGCACAACCTTGGGGTGAGGTG----TGGGCCTGTCCC-ACCAAGGTACTCATCTCTAAGAAGGCAAGAATGGACAG
TGTCATGACCCAGTATACAGCTCGTATTTGGAAAAG---GTTCT--tgatatagttt-ggatatttgcctcc
tccaaatctcatgtgaaatgtg-----ttggcgggtggggcctgg-----
-tgggaggggtctgggttatgggtgacccctggatagcttgggtgtagctctcacggatcatgagaggcctctc
cctctattagttcatcctaggcctgggtgtttaaagaagcatggtgc---cccttccctctctcctctgtctgcctc
accttgtga--tgctgctccccctctgctct-ccaccatgagtggaag-----
-----ctctctgaggcctccaaaga-----agc
aggtgctggtgccatgcttcccgtacagcctgtagaaccaggagccaaatcaatctc-----ttttctttataaatta
cc-----cagccttaggtcttctttagagcaatgcaaaa-tggaccaagaca---GTTCC---CT
AGTTGAAAAGGTAAGTTC-ATTTAAGCATGGGTCTCACTTTTCGAGGGGTACTGGTGGTAGGGAGATGGCAGAGGGG
TGTCAAAACCTTCAGGCCATGATGGAATTCAGTACTAGTGTCCCA
```

>Baboon

```
CATGCACAACCTTGGGGTGAGGTG----TGGGCCTGTCCC-ACCACGGTACTCACCTCCAAGAGGGCAAGAATGGACAG
TGTCATGACCCAGTATACAGCTCG-ATTTGGAAAAG---GTTAT--tgatatggttt-ggatatttgcctcc
```

tccaaatctcacgtggaatgtg-----ttggaggtggggcctgg-----  
-tgggaggtgtctgggttatgggtgctggaccctgggtgaatagcttgggtgcacctctcactgtcttgagagggcctctc  
cctctattagttcatgctaggcctgggtgtttaaagaagcatgggtgc---cccttccctctctcttccgctccaccctc  
accttgtga--tgcctgctcccctgtgctct-ccaccatgag-gggagCCTGACCACACCCTATGGCTCACTTTTCATA  
AAGCAGGAGGCACTGGACTTCAGAAGGAAACTCACCCAGTCATGATCAGAGGTGAGTGCCCCATGCCTATTTTCCTCAA  
TGGACGCTTCTTGCATATCCAGCACTCATCTGCAACCCCTTTAGAGGCCTctccctgaggcctctaaaga-----agc  
agatgctgggtgtcatgcttcccgtacagcctgcagaacctgagccaaatcaacctc-----ttttctttataaatta  
cc-----cagccttaggtcttctttatagcaatgcaaaa-tggaccaagata---GTTCC---CT  
AGTTGAAAAGGTAAGTTC-ATTTCAGCATGGTTCCTACTTTTGGCAGGGGTACTGGTGGTAGGGAGATGGCAGAGGGG  
TGTCAAACCCTTCAGGCCATGATGGAAATTCAGTGACTAGTGTCTTA

>Rhesus

CATGCACAACCTTGGGGTGAGGTG---TGGGCCTGTCC-ACCATGGTACTCACCTCCAAAAGGGCAAGAATGGACAG  
TGTCCTCCATGGACCCAGTATACAGCTCG-ATTTGGAAAAG---GTTAT---tgatatagttt-ggatatttgtcccc  
tccaaatctcacatggaatgtg-----ttggaggtggggcctgg-----  
-tgggaggtgtctgggttatgggtgctggaccctgggtgaatagcttgggtgcacctctcctctgtcttgagagggcctctc  
cctctattaggtcatgctaggcctgggtgtttaaagaagcttgggtgc---tccttccctctctcttccgctccaccctc  
accttgtga--tgcctgctcccctgtgctct-ccaccacgag-gggagCCTGACCACACCCTATGGCTCACTTTTCATA  
AAGCAGGAGGCACTGGACTTCAGAAGGAAACTCACCCAGTCATGATCAGAGGTGAGTGCCCCATGCCTATTTTCCTCAA  
TGGACGCTCCTTGCATATCCAGCACTCATTTGCAACCCCTTTAGAGGCCTctccctgaggcctctaaaga-----agc  
agatgctgggtgtcagccttcccgtacagcctgcagaacctgagccaaatcaacctc-----ttttctttataaatta  
cc-----cagccttaggtcttctttatagcaatgcaaaa-tggaccaagata---GTTCC---CT  
AGTTGAAAAGGTAAGTTC-ATTTCAGCATGGGTCTACTTTTGGCAGGGGTACTGGTGGTAGGGAGATGGCAGAGGGG  
TGTCAAACCCTTCAGGCCATGATGGAAATTCAGTGACTAGTGTCTTA

>Tarsier

CCTGCACAGCTTGGGGTGAGGAGACATG--CCTGTCTTACCATAGTGCTCGCCTTCAAGAGGGCAAGGGTAGAACG  
CATCCTCCATGGACCCAGGGCACAGC-CATATCGGGAAGAG---GTTCC---tgagagagttttggaatttgtcccc  
tccaaatctcatgtcaaactgtgatccctaattgtt-gaggtgggtgtttgggttatagcagtggtattgggtcaatgag  
gcaggaggtgtctgg-tcaaaggagtggatctctcatgaatggcttgggtgccttctttgaggtaatgagtgagttctt  
gctgtattagttcatacaagatctgggtgtttaaa--agcctgg--c---acctcccttctctctcccttctctctt  
gccatgtga--tgcctgctcac-----  
-----aaga-----gac  
ggggtct--tgccatgttgcttagctagccttgaactcctggcatcaacaatcctcccaccttggcctcccaaagt  
ctgggatgacaggcagcacagcctcagttatttctttacagcagagcaaaa-tggactaagaca---GTTCC---CT  
GGTTGAAAAGGCACATTC-ACCTGAGCCTGGGTCTACTTTTACG-----TAGTGGCGGGAAGGTGGCAGAGGGA  
TATCAGTCCTTTAGGTTCATGATGGAAACTCAGTGACTAGCATGCGA

>Bushbaby

TA---CAACTTGGGGTGAGGGAGGCATG-GCCTGTCCCCTCCACAGTGCTCACCTTTTCAGGGGGCAAGGGTAGACGG  
TGTC-CCCTGGACACAGTGACAGCCCTTATCAGGAAGTG-----  
-----  
-----  
-----  
-----  
-----  
-----  
-----  
-----  
-----  
-----  
-----GTTCC---CT  
GATTGAGAATAGAAATTC-ACTCGAGCACAGGTCTTATTTTTGGT--GGTG-TGGTGGCAGA-----GGG  
CACCAATCCTTTTAGGCCACAATGGAGGCTCAGTGACTAGTGTCC-A

>Mouse\_lemur

CA---CAACTTGGG-TGAGGGAGGCATG-GCCTGTCCCCTCCACAGTGCTCACCTCCAGGGAGCAAGCGCAGACAG  
TGCC-CCATGGATCCAGTGACAGCCCGTATCCAGAAGAG-----  
-----  
-----  
-----  
-----

```
-----  
-----  
-----GCTCC---CT  
ATTTGAAAACACAAATTCACCTGAGCACAGACCTCACTTTTGGC---GGTGCTGGTGGCAGA-----GGG  
GACTGGTCCTTTTCAGGCCACA-TGGAAACTCAGTGACTAGTGTCCCA  
>Tree_shrew  
CATGCACAATTTAGGGCAGGGGAGGCGTG-GCCTCTTCCTACCATGATGCTCACCTCCAGCAGGGCAAGGGCAAACAG  
TGTCC-CCATGGACCCAGTCCACAGCCCATCTTGGGAAAAG-----  
-----  
-----  
-----  
-----  
-----  
-----  
-----  
-----GCT-C---CT  
AGTGGCGAAGGCGAATGC-AGCCAAGCACGGCTGTCACTTT-----GGTGCACCAGTGGTGAAGAGGTGGCAGAGGGG  
TGTCATCC-----AGG-----
```





TTATTTCGTCTACTTACTTCACTGCCAAACCTAAGGGGAAAGAG

>Orangutan

AGGACT-TCTGCCTTCCATCCAGACTTAGAGATCCAGGGGCCTTCGGTTGGGCCTGTGGTGGTTTTCCATTTCACCCA  
GTTGTCTCCACCCCTTCCCAACACGGATCTAGAAGTGATACCAAT---TAGTCATTTAAC-----AACATAAGTTT  
---GTCACCT-GTCATCTTCTGGTCACCCAGGCTCCCAAGCAGTT-TCAAGGCTAACCTATTCTTGGCTTTAGCCTC  
AGCCTCAACCATTACATACATAAAGCTGCCAAA-----  
-----TTC-TCTTCTAGAGTATTTTAGTCTTCTTCCCATCA  
-----GCCCTCAGATATACGAAGGCCAGAATTCTTCTTCTCAAGCACAGACCTAATCATTGTCACTCA---CCTGC-  
--tgatacagtgatgaatatttgtcccctccaaatctcacattgaaatttgatccccaatattggaggtggagcccagt  
gggaagagtt-----ggggcagatgcctcttgaatggctaagtgcc-----atcc-tgtgggattgagtgagtt  
ctcactc--ttagttcccagatctggctgttaaaaagagt-----ctcccctcttcttctcctcct  
ctgtcaccatgtgat-----gccagctcctcttccccttctgcatgactggaagattcctgaagccctcacc  
agaagcagatgctgggtgttatgcttctgtacagcctgcagaacagtgagccaaataaacctctttctttataaatt  
accagcttctgggtattcctttacagcaacat-aaatgaactaagata---CCTGC---TTT--AAAAAAAAT----  
-----GGCTACCAATA-----TTTTACAGAATAAAA-----CCTAAACAACCTCATCCA---GC-  
-----GGACTTTGGGCTTCTTTT-----CTAATGCCCCCATAACAGCCTGTTTCTGGAAAGCCAT  
CCTTATAATGTGAACCCACTGTTCCCTGCGTTCCTCAGTCCCTAGGCTGGACATTTGCTCTCTCCTCCCCCTGGAAA  
GTCTCCCCACCTC-CCCACCACTAACTCTA-TCCACTCATCCCAACTTCAACAAAGTATCCAGATTTCTCCTAGTCA  
AAATTCATCATTCTCTTGTTTTTTCTAATCACTTTGCTTTATAGCA-----CATTTGCATTATATTTATAGTAA  
TTATTCATCTACTTACTTCACTGCCAAACCTAAGGGGAAAGCG

>Baboon

AGGACT-TCTGCTCTCCATCCAGACTTAGAGATCCAGGGGCCTTAAGTTTCATCCTGTGGTGGTTTTCCGTTTTCACTCA  
GTTGTCCCATCCCTTCCAAAAATGGATCCAGAAGTGATACTAAT---TAGTCATTAAAC-----AACCGTAAGTTT  
---GTCACCT-GTCATCTTCTGGTCACCCAGGCTCC----CAGTT-TCAAGGCTAACCTAGTCTTGGCTTTAGCCTC  
AGCCTCAACGATTACATACATT-AGCTGCCAAA-----  
-----TTC-TCTTCTGGAATATTTTAGTCTTCTTCCCATAA  
-----GCCCTCAGATATACAAAGGCCAGAATTCTTTTCTAAAGCACAGACCTAATCATTGTCACTCA---CCTGC-  
--tgatacagtgtaaatatttgtcccctccaaatctcatggtgaaattcgatccccagtggtggagatggagcccagt  
gggaagagtttgggtcatggggcagatgcctcttgaatggctaagtgcc-----atcc-tgtgggattgagtggggtt  
ctcactc--ttagttcccacagatctggctgttaaaaagagtctggcacctcc--ttcccctcttcttctcctcct  
ctctcaccatgtgat-----gccagctcctcttccccttctgcatgagtggaagcttctgaagccctcccc  
agaagcagatggtggcgcttctgcttctgtacagcctgcagaacgggtgagccaaataaacctctttctttataaattc  
accggcctcaggtattcctttacagcaacat-aaatgaactaagaca---CCTGC---TTT--AAAACAAAAT----  
-----GGCTACCAATA-----TTTTACAGAATAAAA-----CCTCAACAACCTCATCCA---GCA  
TTCAGTCTCGACCTACTTGGACTTTGGGCTTCTTTT-----CTAATGCCCCCATAACAGCCTGTTTCTGGAAAGTCAT  
CCTGGTAATGTGACCCACTGTTCCCTGTGTTCTCCAGTCCCTGGGCCTAGACATTTGCTCTCTCCTCCCCCTGGAAA  
ATCTCCTCACCTC-CCCACCACTAACTCTA-TCCACCCATCCCAACTTCAACAAAGTATCCAGATCTCTCCTAGTCA  
AAATTCATCATATTCTCTTGTTTTTTCTAATCACTTTGCTTTA-----AACCATTTGCATTATATTTATAGAAA  
TTATTTGTCTGCTTACTTCACTGCCACACGTAAGGGGAAAGAG

>Rhesus

AGGACT-TCTGCCCTCCATCCAGACTTAGAGATCCAGGGGCCTTAGGTTTCATCCTGTGGTGGTTTTCCGTTTTCACTCA  
GTTGTCCCATCCCTTCCAAAAATGGATCCAGAAGTGATACTAAT---TAGTCATTAAAC-----AACCGTAAGTTT  
---GTCACCT-GTCATCTTCTGGTCACCCAGGCTCC----CAGTT-TCAAGGCTAACCTAGTCTTGGCTTTAGCCTC  
AGCCTCAACGATTACATACATTAAGCTGCCAAA-----  
-----TTC-TCTTCTGGAATATTTTAGTCTTCTTCCCATAA  
-----GCCCTCAGATATACAAAGGCCAGAATTCTTTTCTAAAGCACAGACCTAATCATTGTCACTCA---CCTGC-  
--taatacagtgtaaatatttgtcccctccaaatctcatggtgaaattcgatccccagtggtggagatggagcccagt  
gggaagagtttgggtcatggggcagatgcctcttgaatggctaagtgcc-----atcc-tgtgggattgagtggggtt  
ctcactc--ttagttcccacagatctggctgttaaaaagagtctggcaccttc---ctcccctcttcttctcctcct  
ctctcaccatgtgat-----gccagctcctcttccccttctgcatgagtggaagcttctgaagccctcccc  
agaagcagatggtggcgcttctgcttctgtgagcctgcagaacgggtgagccaaataaacctctttctttataaattc  
accggcctcaggtattcctttacagcaacat-aaatgaactaagaca---CCTGC---TTT--AAAACAAAAT----  
-----GGCTACCAATA-----TTTTACAGAATAAAA-----CCTCAACAACCTCATCCA---GCA  
TTCAGTCTCAACCTACTTGGACTTTGGGCTTCTTTT-----CTAATGCCCCCATAACAGCCTGTTTCTGGAAAGTCAT  
CCTGGTAATGTGACCCACTGTTCCCTGTGTTCTCCAGTCCCTGGGCCTAGACATTTGCTCTCTCCTCCCCCTGGAAA  
ATCTCCTCACCTC-CCCACCACTAACTCTA-TCCACCCATCCCAACTTCAACAAAGTATCCAGATCTCTCCTAGTCA  
AAATTCATCATATTCTCTTGTTTTTTCTAATCACTTTGCTTTA-----AACCATTTGCATTATATTTATAGAAG  
TTATTTGTCTGCTTACTTCACTGCCACACGTAAGGGGAAAGAG

>Marmoset

ATGACT-TCTGCCCTCTATTTCAGAGTTAGAGATCCAGGGGCTTCAGTCGGGCCTGTGGTGGTTTTCCCGTTTTACCCCA  
GTTTTCCCTACCCTTTCCAGCACTGATCCAGAAGTGATGCTAAT---CAGTCATTTAAC-----AACCGTAAGTTTT  
---GTTACCT-GTCATCTTCCTGGTCACCCAGGTTCCCAAGCAGTT-TCAAGGCTAACCTAGTCTTGGCTATAGCCTC  
AGCCTCAACCATTACGTACAATAAGCTGCCAAA-----  
-----TTG-TCTTCTAGAGTATTTTAGTCTTCTTCCCATAA  
-----GTCCTGAGATACACAAAGACCGGAGTTATCTTTCTAAGGCACAGACCTAATCATTATCACTCA---CCTGC-  
--tgatatagtgatgaacatttgtcccctccaaatctcatggtgcaatttggatcccccaacactggggacgggacccagt  
gggaggagttttgggtcac-ggggcagatctctcctgaatggctatgtgcc-----atccttggggatttagtaagtt  
ctcactc--ttagttcccagagatctgg-tgttaaaaagagtctgtcacctcc---cttccctcttcttcccct-  
ctgtcaccatgtgat-----gccagctcctcttccccttctgcatgaatggaagcttcccgaagccgtcacc  
agaagcagatgcttctg-tatgcttctgtacagcctgcagaactgtaagccaaataaacctcttcttataaatt  
accagcctcaggtattcctttacagcaacat-aaatgaattaagaca---CTTGC---TTT-TAAAAAAAT----  
-----GGCTGCCAGTT-----TTTTACAGAATAAAA-----CCTAAGCAACGCATCCA---GCA  
TTCAGTCCCAACCTATTGGAGTTTGGGCTTCTTTT-----CTATTGCCACCATACAGCGTGATCCTGGAAAACCAT  
CCTGATCATGTGACCCCACTGTGCCCTGTGTCTCCAGTCCCTAGGCCTGGATGTTTGTCTCTCCTCCCCTGGAAA  
ATCTCTTACCTC-CCCACCCTTACTCTA-TCTACCCTCCACCTTCTACAAAGTATCCAGATTTCTGTCTCATC-  
AAATTCATCACATTCTCTTGTCTTCTAATCACTTTGCTTTCATAGCACATTAACCATTTGCATTATATTTATATTA-  
TTATTTGTCTACTTACTTCACTACCACCTGAGGGGAAAGGG

>Tarsier

-----CTGTGATGGTTTTCTGTTTTACCCCA  
ATTTTCCCCACACTTTCCACCCTAACCAGAAAGTGATACTAATAAATAGTCATTTAAC-----AAGCACAGGTCT  
---CTCACCTGGCCATCTCTCTTGTACCCAGGTTCCCAAGAACT-TCAAGGTTAAGCTAGCCATGGTCT--GTCTC  
AGCCTCAACCATCACATCCTCTAAGTTACTAAATCCTGTATCTTCTTCTCAGCAATATTTTCTACATGTATTTCTC  
TCTTGCATCTAGCCTCCCTAGTTAAGGCCCTCATCT---TTC-TCTTCTAGGGTATTTTAGTCTCGTTCCCATAA  
-----GCCCTCAGATATACAAAGGTCAGAATTTTATTCTAAAGCA---ATCCGATCATTGTCACTCA---CTGGC-  
--taatactggtggcatgttcatcacctccaaatctcatggtgaaatgtgggtcaccaatgtcagaaatggggcataat  
gggagggtgttgggtcatgggaacagattccttatgaatgggttggcacc-----attctcacaggcttgagtgaatt  
cacactc--ttagttcccacgagacctggctatt--aaagagtctggcacctcctcttctctcttcttcttcttctt-  
---tgaacttgtgac-----actggcttcttctctcttcccctgtgg--ggaagtttctgatgccctctcc  
agcagcagatactggcaccagggtttttatacatcctgcaacattgtgagccaaataaaacttctt--tttataaatt  
actccgcttcagggtatttctttatataaacac-aaatggacaagata---CCTGC---TTT---TAAAAAAT----  
-----GGTTCCCAATTTTTTTCTTTTACAGAATAAAA-----CTCTAGCAATGCATCCA---GCA  
TTCAGCGTCAACCTAATTGGACTCTGGTTTTTTTTTTTTTCTAATGCCCTCCATTAGTCTATTCTAGAAAAGGCTT  
CCTAACAAGATGACCGCACTGTGCCCTGTGCTCTCCAGCCTTTAGGCCTGGACTTCTGCTCTTCCCTCCCCTAGAAA  
GTCATTCCACCTTGTCTGTTACTAATTCTA-TCCACACAACCTCACTTTCTCAAAGCATCCAGATTTCTCCCAAGTC-  
ATTTTCATCTCTTTCCCTTGTCTTTCTAATCA--TTGTTTTA-----TGAATTTACA-----  
TTATTTGTCTACTTCTCCTGCCATACTTGAGGAGAAAGGA

>Bushbaby

ATGACTCCCTGCCCCC-ACTCAGTGTAC-AGATCCA-GGGCCTTCAGTTGGACCCATGGTGGTTTTCTATTTACCTG  
GCTTTTCTCATCTTTCTCAACAATGACCCACAAGTGATTCTA-----TTATCATTAGACTCAGAGGACTATGGGTTT  
AGAGAAGTATGGCCATCTTCTAGTCACTCAGGCTCCCAAGCAGCT-TCAAACTAAGTCTAGCCTTGGCCTCAGTCTC  
AGCCTCAACTATCACATCTGATAAGGTGCCAGATTCTGAAGATTTACCCTCAGCAACATCTCTCACATGTATTTCTT  
CCTTGTACCCAGCCTCCCTGATTAAGGCCCTCATCATTTA-TTCATCTTTTAGAATAT--AATCTCCCTCCTCATTA  
-----GCCCTCAGATATACCAATATAGAATCCCCTTTCTAAAGCAAACGCATCATCATTGTCACTCA-----  
-----  
-----  
-----  
-----  
-----  
-----  
-----  
-----  
-----CCTGC---TTT--AAAAAGGAG-----  
-----GTGGGGAGTGGCTCCT-ACT-----TTTTGCAGAATAAAA-----CCCAAACAATTCATCCA---GCA  
TTCGGTCTCAACCTAAGTGGACTCCAGGCTTCTTTT-----CCAATGCCCTCCACCCAGC-TGTTCTT-AAAGCCAT  
CCTGATAAGGTGACCCCACTGTGCCCTGTGCGCTCTTGTCTCCAGGCCTGAACTTATGCC-CCCCTTCTCCCTAGAAA  
GTCTTTCCACCTC-CCCACCACCAACTCTG-TCCAACCATCCACATTCTCAAAGCATCCAGATATCTCTTTAGTCA  
AAATTCAACTCATCCCCTTGTCTTTTGTAAATCACTTTCTTTATAGAACACT-AACCACTTGCATTATATGTATA----  
CTCTTTTTCTGCCTACT-----TGAGGGGAATGGG





TGTTAGATCAAATACAT-----TACAGGTATTTACTGCTGGGTGGAGTAGCATTATTT---ATGTA CTT--TTGT  
ATCTTTATTTTTAGCTGCATCTGGTGAAGTGATCAGAATCAACCTTGTTTTGAAGCTGGATATATTAAATCCCCACTTT  
ACTGGGAGCTCCCTCAGC---ACATGTCTGAGGAACT---GAGGG---tgctatggtttggatatttgatccctccaa  
agcccatattgaa-----ggaggggggtgcctgggtggaaggtggttgggtc----atgggtgggtggat  
ccctcatgaatggcttggagccattc----ttgcagtagtgagtgagttcttactcttttcattcccatgacagctgg  
ttgtaagaagagcctggcatct-cctccccctctctcttgcctcctctcttgcctatgtgatctctgcacacaccagct  
cccctttgctttctgtcaggagtggaagcggcctgaggcttcacaagctgc-----ccagtcttc-----c  
agccagtagaatcatgagtaaagtaaact--tttctctataaattaccagcctcggatattccttcatagcaa-ac  
-aggcagactaagatg--G-GGG---CCTGCCACTCAAGGTGGCAG-TGCTGATAGATTTCCCAAGGCCCTTAGATTT  
ATATCCCTCATCCCCACCCA-----CTGACCATAACCACAGTCCATCTAGCCCTGTTTCATTGCTGGGG---AT  
ACTAGCACTCAGCTGAGAAGACATCACTGCTTCTTC--CCAGGAAAGCCCCCTTGTTGATGCTCATGCGCTGGTTGA-T  
ATTGGCTGGCACCATCTGTA C TCTAACTTTTACAGAGTCTTAA-----AGAATCCAGGCCCAGTGT TTTGTTCTC---  
---TTCTCTAAA A C TCAAAT TGA--TGTTTTCT

> Baboon

TGGGGATGGGGTGAAGGATGTCAAATGGTCCTTAGAGCTGCTACTGATAGAAGCCACAGGGATTTACTACTTGGCCTA  
GTAAGTTTTT-TGAAGCCACTTCAAGACTGGAAAAAAGGCACAGATAAA--CATTCTGATATTAATGGAGCACAGA  
AATTTGTTTTT CAGGTACCTAGATCCTAAGCTCTCTGGCCTCCAGATTCTGCCCTGGAAGCTTGCAGGATGAGGCCCT-  
-----ATACAT-----TACGGGTATTTACTGCTGGGTGGAGTAGCATTATTT---ATGTA CTT--TTGT  
ATCTTCATTTTTAGCTGCATCTGGTGAAGTGATCAGAATCAACCTTGATTGAAGCTGGATATATTATATCCCCACTTT  
ACTGGGAGCTCCCTCAGC---ACATGTCTGAGGAACT---GAGGA---tgctatggtttggatatttgatccctccaa  
agctcatgttgaa-----ggaggggggtgcctcttgggaggtggttgggtc----acgggtgggtggat  
ccctcatgaatggcttggagccattc----ttgcagtagtgagtgagatctcactcttttcattcccatgacagctgg  
ttgtaagaagagcctggcatctccctccccctctctcttgcctcctctcttgcctatgtgatctctgcacacaccagct  
cccctttgctttctgtcaggagtggaagcagcctgaggcttcacaagctgc-----ccagtcttc-----c  
agccagtagaatcatgagccaagtaaact--tttctctataaattacctagccttggatagccttcatagcaaacac  
-aggcagactaagatg--G-GGG---TCTGCCACTCAAGGTGGCAG-TGCTGATAGATTTCCCAAGGCCCTTAGATTT  
ATATCCCTCATCCCCACCCA-----CTAACCATAACCACAGCCACCTAGCCCTGTTGCATTAAGCCTGGGG---AT  
ACTAGCACTCAGCTGAGAGGACATCACTGCTTCTTC--CCAGGAAAGCCCC---TTGATGCTCATGGGCTGGTTGA-T  
ATTGGCTGGCACCATCTGTA C TCTAACTTTTACAGAGTCTTAA-----AGAATCTAGGCCCAGTGT TTTGTTCTC---  
---TTCTCTAAA A C TCAAAT TCGA--TGTTTTCT

> Rhesus

TGGGGATGGGGTGAAGGATGTCAAATGGTCCTTAGAGCTGCTACTGATAGAAGCCACAGGGATTTACTACTTGGCCTA  
GTAAG-TTTT-TGAAGCCACTTCAAGACAGGAAAAAAGGCACAGATAAA--CATTCTGATATTAATGGAGCAGAGA  
AATTTGTTTTT CAGGTACCTAGATCCTAAGCTCTCTGGCCTCCAGATTCTGCCCTGGAAGCTTGCAGGATGAGGCCCT--  
-----ATACAT-----TACGGGTATTTACTGCTGGGTGGAGTAGCATTATTT---ACGTAATT--TTGT  
ATCTTCATTTTTAGCTGCATCTGGTGAAGTGATCAGAATCAACCTTGATTGAAGCTGGATATATTATATCCCCACTTT  
ACTGGGAGCTCCCTCAGC---ACATGTCTGAGGAACT---GAGGG---tgctatgatttggatatttgatccctccaa  
agctcatgttgaa-----ggaggggggtgcctcttgggaggtggttgggtc----acgggtgggtggat  
ccctcatgaatggcttggagccattc----ttgcagtagtgagtgagatctcactcttttcattcccatgacagctgg  
ttgtaagaagagcctggcatctccctccccctctctcttgcctcctctcttgcctatgtgatctctgcacacaccagct  
cccctttgctttctgtcaggagtggaagcagcctgaggcttcacaagctgc-----ccagtcttc-----c  
agccagtagaatcatgagccaagtaaact--tttctctataaattacctagccttggatagccttcatagcaaacac  
-aggcagactaagatg--G-GGG---TCTGCCACTCAAGGTGGCAG-TGCTGATAGATTTCCCAAGGCCCTTAGATTT  
ATATCCCTCATCCCCACCCA-----CTAACCATAACCACAGCCACCTAGCCCTGTTGCATTAAGCCTGGGG---AT  
ACTAGCACTCAGCTGAGAGGACATCACTGCTTCTTC--CCACGAAAGCCCC---TTGATGCTCATGGGCTGGTTGA-T  
ATTGGCTGGCACCATCTGTA C TCTAACTTTTACAGAGTCTTAA-----AGAATCTAGGCCCAGTGT TTTGTTCTC---  
---TTCTCTAAA A C TCAAAT TCGA--TGTTTTCT

> Marmoset

TGGGGATGGGGATGAAGGATGTCAAATGGTCCTTAGAGCGGCTTCTGATAGAAGCCACAGGGATTTACTACTTGGCCTA  
GTAGTTTTT-TCCAGCCACTTCAAGGCTGGAAAAAAGACACAGAGAAAATCATTCCAGGTATTAATGGAGCTATGA  
AATTTGTTTTT CAGGTACTTACATCCTAAGTTCCCTGGCCTCCAGATCCTGCCCTGGAAGCTTGCAGGATGAAGCCCTT  
TGTTAGATCAAATACAT-----TACGGGTATTTACTGCTGAGTAGAATAACATTTATTT---ATGTA CTT--TTGT  
ATTTTTATTTTTAGCTGCATCTGGTGAAGTGATCAGAATCAACCTTGTTTTGAAGCTGGATATATTAAATGCCACTTT  
ACTGGGAGCTCCCTCAGC---ACATGTCTGAGGAACT---GAGGG---tggatggtttggatattttgatccctccga  
agttcatgttgaa-----ggaggtgggtgcctcgtgggaggtggttgggtc----atgggtggcagat  
ccctcaggaatagcttggagctattc----ttgcaatagtgagtgattctcactcttttcggtcccatgacagctgg  
ttgtaagaagagcctggcaccctccctcacctgcctcttgcctcctctctcaccatgtgatctctgtacatgccagct



TTGTTCTCTAAAACATAAATAGA--TGTTTTCT

>Horse

-GGGGCTGGGGTGGAGGGTGCCAAATGGCCCTTAGAGCTACCGCTCATAAAAACCAGAGGGATTTGCTACTTGGCTTG  
GCAAGTTCTT-TCCAGCCACCTGAAGGCT-----GGGTCCAGGGAAGACCATTCCGGATATCATATGGAGCACTGA  
AATTTGTTTTTCAGGCAATCACATCCTAAAACCTCCCTGACCATCAGGTCTGCCTGGGCTGTTGGTGGGGTGAGGTCTC  
TGTCAGATCAAATACGT-----TAGGAATATTTACTGCTGGGACAAGTTGCATTTGTTTATCATGTACTT-ACGT  
ATGTTTATTTTTAGCCATAACCGTTGGAGTGATCAGAACTGACCTGATTTGAAGCTGGCTGTGTTAAAGTCCCAGTTT  
ACTGGGGGCTCCCTCAGC--AC-----AT-----

-----  
-----  
-----  
-----  
-----

-----GGGG--CCTGGTCACTCAAAGTAGAAGGTCCTGACAGAGCTCCTAGAGCCCTTTG-TC  
ATA-TACCCAC--CCTTCC-----CCGACCACACCACAG-CCATGGGGGCTGGTGCAATGAGCCCAAAGATTAT  
TCTAGGATTGAGCTGGGAGAACATCCCTGACTTTTA--CCAGGGGGCCCTTGTGAA--TCAGGGGCTGGCTGA-T  
GTTGGTTGGCACCA-CTGTACCATATCTTCTAGAAAATCCTTAT-----AGAATCTGGGCCATTGTTTGTCTCTCC  
CTGTCTCTAAAACATAAACGGAGCTGTCTTCT





atagattaatgacctcccttgaagggg-----gtgagtaagttctcactctg--agttcctatgagagctggt  
tggtatacagggcacagcacctccctccctctctcttctgcttccctccccaccatgtgatctctgtgatgctggct-  
--cctgttcacctcccactatgagtgcaagcaggttgatgacctcacg--agaagcagatgctggcactattcttctt  
gtataggctgtagaaccataaggcaataaacctcctttctttataaattaccagcctcaggtattcctttatagta  
acacagat-----atggactaagaca---CTTGT---TCTGGAATTGCACAGCATAAGG  
AATGAGTCATTCTTACGTTTCCTTCTTC----TTATTACCTGTGGTGACCAACCACAGTGCTCCCTTACCAGGTGATC  
TTTGGCCTAACTCCAAGAGCTCCCCTTAATGGCAGATCTTATCAGTT-GCTGCTCACCTTCCCTCTCCATTTTCTTT  
CATTTGTCACTGACATTCTGCCC-CCTCCCAGTCAGACTGTAAACAGAGGATGTCCAACCAAACAGTGGCCCTTCTGC  
AGGAATTTAGATTGAGATGAGGA

> Baboon

CAAGTTATATGGCTATATGCGTGGTTTTATACTTGTATGAAGTACTTGCTGTC--TAGTGAATTTAAATCTGAG-AAA  
AAAGATTTAAGCTGAAGAAATATAATGTCTGCCAGAAGGCAGAGGGGCAATTTGTGAGAGAACATCAAGGTATCC-TA  
AATCATAACAATATTACCATAGTTGAAATATCCATGCTCCAAGTAGATG-----CGTTCAATATTCCAAACAC  
TGCTAGAGAGTAGAGCACAGAGTCTTCAAC-TTTGTTCTGGGTGTTCCGGGGAGCAATCATATTTTCTCATTTTTCC  
TGTATTGGTGCCTTTGATGCCACAGTGTGTAT---CTTGT---tgtgatagtttggatgtttgtcccttccaaatatac  
a-tctgaaatttgggtccccaaggttgaagggcagggcttcgtgggagttgtttggatcatgggagcaaatccctcatga  
atagattaatgacctctcttgaagggg-----gtaagtgtcactctg--agttcacatgagagctgct  
tggtataaagggcacagcacctccctccctctctcttctgcttccctccccaccatgtgatctgtgtgcatgctggctc  
cccctgtt---ctcccactatgagtgcaagcaggttgatgacctcacc--agaagcagatgctggcactattcttctt  
gtacaggcagtagaaccgtaaggcaataaa---cctttttttataaattaccagctcaggtattcctttatagta  
acacagatattggactaagacacttgttctggaatggactaagaca---CTTGT---TCTGGAATTGCACAGCATAAGG  
AATGAGTCATGCTTACGTTTGTCTTCTTC----TCATTACCTGTGGTGACCAACCACAGTGCTCCCTTACCAGGTGATC  
TTTGGCCTAACTCCAAGAGGT-CCCTTAATGGCAGATCTTATCAGTT-GCTGCTCACCTTCCCTCTCCGTTTTCTGT  
CATTTGTCACTGACATTCTGCCC-CCTCCCAGTCAGACTGTAAACAGAGGATGTCCAATCAAGCAGTGACCCTTCTGC  
AGGAATTTAGATGCAAGATGGGGA

> Rhesus

CAAGTTATATGGCTATATGCATGGTTTTATACTTGTATAAAGTACTTGCTGTC--TAGTGAATTTAAATCTGAG-AAT  
AAAGATTTAAGCTGAAGAAATATAATGTCTGCCAGAGGGCAGAGGGGCAATTTGTGAGAGAACATCAAGGTATCC-TA  
AATCATAACAATATTACCATAGTTGAAATATCCATGCTCCAAGTAGATG-----TGTTCAAGATTCCAAACAC  
TGCTAGAGAGGAGAGCACAGAGTCTTCAAC-TTTGTTCTGGGTGTTCCGGGGAGCAATCATATTTTCTAATTTTCTC  
TGTATTGGTGCCTTTTATGCCACAGTGTGTAT---CTTGT---tggtatagtttggatgtttgtcccttccaaatatac  
a-tctgaaatttgggtccccaaggttgaaggttagggcttcgtgggagttgtttggatcatgggagcaaatccctcatga  
atagattaatgacctctcttgaagggg-----gtaagtgtcactctg--agttcgcatgagagctgct  
tggtataaagggcacagcacctccctccctctctcttctgcttccctccccaccatgtgatctgtgtgcatgctggctc  
cccctgttcacctcccactatgagtgcaaacaggttgatgacctcacc--agaagcagatgctggcactattcttctt  
gtataggcagtagaaccgtaaggcaataaa---cctttctttataaattaccagcctcaggtattcctttatagta  
acacagatattggact--gacacttgttctggaatggactaagaca---CTTGT---TCTGGAATTGCACAGCATAAGG  
AATGAGTCATGCTTACGTTTGTCTTCTTC----TCATTACCTGTGGTGACCAACCACAGTGCTCCCTTACCAGGTGATC  
TTTGGCCTAACTCCAAGAGGT-CCCTTAATGGCAGATCTTATCAGTT-GCTGCTCACCTTCCCTCTCTGTTTTCTGT  
CATTTGTCACTGACATTCTGCCC-CCTCCCAGTCAGACTGTAAACAGAGGATGTCCAATCAAGCAGTGACCCTTCTGC  
AGGAATTTAGATGCAAGATGGGGA

> Marmoset

CAAGTTATATAGCTATATGCATGGTTTTATATTTGTATAAAGTACTTGCTGTC--TCATGAATTTAAATCTGAG-AAT  
AAAGATTTAAGCTGAAGAAATATAATGTCTGCCAGAGGGCAGAGGGGCAATTTGTGAGAGAACATCCAGCTATCC-TA  
AATCATAACAATATTACCATAATTGAAATATTTCATGCTCCAAGTAGTTG-----TGTTCAAGATTCCAAATGC  
TGCTAGAGAGGAGAGAACAC--AGTCTTCTACTTTTGTCTGGGTGTTCCAGGGAGCACTTATTTTCTCATTTTTCT  
TGTATTGGTACCCTTGATGCCACAGCATGTAT---CTTGT---tgctatagtttggatctgtcccttccaaatatac  
a-tttgaaatttgggtcaccaaggatgaaggttagggcttctgtgagttgtttggatcatgggggcaaatccctcatga  
atagattaatgcctactcttgaagggg-----gtgagtgagttctcac-ctg--aggtcccatgagtgctggt  
cggtataaaagacacagcacctccctcctctctctcttctgcttccctccatcacgtgacctctgtgcatgctggct-  
--ccttttcacctcccaccatgagtggaagcaggtgatgatctcaccaaagaagcagatgctggcaccattcttctt  
gtataggctgtgtaa-----ctttctttataaattaccagccttaggtattcctttatagta  
acacagaa-----atgaacaaaaca---CTTGT---TCTAGAATTGCACAGCATAAGA  
---GAGTCATGCTTATGTTTGTCTTCTTC----TCATTACTTGTGGTGACCAACCACAGTGCTCCCTTACCAGGTGATC  
TTTGGCCAAACTCCAAGAGCT-CCCTTAATGGTAGATCTTATCAGTT-GCTGCTCACCTTCCCTCTCCATTTTCTCAGT  
CATTTGTCACTGATGTTCTGCCC-CCTCCCAGTCAGACTGTAAACAGAGGATGCCAATCAAAGAGTGGCCCTTTTGC  
AGGAATTTAGATTCAAGATAGGGA

>Tarsier  
CAAGTTCTATAGCTCTATGTATGCTTTTTATACTGCTATAAAGCACTTGTAGTCG-CAGTGAATTTAAATATGGA-AAT  
AAAGATTTAAGCTGAAGAAATATAATGTCTGCCAGAGGACAGAGGGAC-ATTAGTCAGAGGACATTGAGGTATCC-TA  
AATCACATCATATTACCACCATAGGAATATCTATGCTCCCATATCTACTTGGAGCTGTTGCTCAAGGTGCTAAATGC  
TTTTTGGAGAGTAGAACACAGAGTCTTCTAC-TATGTTCTGGGTGTTTCAGGGAACA--CTTACTTTCTTACTTTTTCT  
TGTATTGTTATCTTTGGTGCCACCATATGTAT---TTCGT---tgctatagtttggacgtcgttcc--tccaaatctc  
a-t-----gttggg---agtattggaactggtgtttaatgggaggtggttgagtcattggagat-ggtcccttatga  
atagattaacgccttcctttggtggtgatggggaagagtgagtgagttcttactctgttcattcccacagaagtggg  
tgtaaaaaggcctgacacctccttccccctctctcttgccttctctcttgcctgtatgatctctgcacaagccatct-  
--ccccttcattcttctgtcttgagcagaagcagcctgaggttcttgtc--agatgcagatgctggggaatgcttctt  
gtacagccggcagaaccatgagccaaataaacctctccttttcataaatgacctcttcaggtattcctttgtagca  
actcagaa-----atggactaagaaa---CTTGT---TCTGG--TTGTACACCATAAAGG  
AACAA-----TTTTCTTCTTA---TTATTATCTGAGGTAAACAACCACTATGTTGCTTT-CCAGATGATC  
TCTGGCCTAA-TCCAAGTACT-CTCTTTGTGAGAT-TCTTGCTAATTGGCTGCTTAATCTCCCTTCTTTATTTTCCAG  
CATTTGCTGTTGATCTGCTGTTT-CCTTCCAGGCAGACTGTT-ACAGAGGAGGCTCAACCAAACAGCGACCCTTCTAC  
AGAAATTTGGATTCAAGA----GA

>Bushbaby  
CAAGTTATATAGCTCTGTGCATGTTTTTCTACTTGTACAAAATACTTGTCTGTT--TAGTGAACCTCAAATCT-----  
-----GCAAAGAAATATAATATCTGCCAGGTGGCAGAGAGGGCGATTTTTTCAAGTGGACATCTAGGC-----  
-ATCACACCATGGTACCATAACTGAGATATCCATGCCCGAGGTAGATG-----TGCTCAAAGCGCTAAATGC  
TGTTAGAGGGAAGAACACAGTGTCTTCTAC-TTTGTCCTGGGTATTGTAGGAAGCACTATTATTTTTCCCGTTCTTCG  
TGTGTTGGTGCTTTTGGCACCAGCAGTATACAT-----  
-----  
-----  
-----  
-----CTGGT---CCTGGCCTTGCACAGCACAAGG  
AGTGAGTCTTACCTGT-CTTGCCTCATC----CCCTGACCTGTGGTGAACAGTCATACAGCTACCTTTCCAGATGCTC  
TTTGGCCTAATCCCTTGGAGCT-GCCTTCATGGAGGCTCTCACAAGG-GGCTGCTCACTATCCCGTCTTCATTTTTCTAA  
TGTTTGGCACTGAGCTGCTGCCCTCTGCTCAGACAGACTGCT-ACAGAGAAGGGCCAACCAA--AACGGAGCTTCTGC  
AGGATTTGGAATTCAAAA----TG

>Mouse\_lemur  
CAAGTTATATAGCTCTATGCACGCTTTTTATACTTGTATAAAGTACTTGTATGTC--TAGTGAACCTAAATCTGGG-AAT  
AAAGATTTAGGGTGAAGAAATATAACGTCTGCCAGAGGGCAGAGGGGCAACTGGTCAGTGGATGTCAAGGTACCC-TA  
AATCACAGTATAGTGCC-----ATCTCCATGCTCCAAGTAGATG-----TGTTT-AAGTGCAGAAATGC  
TGTTAGAGAGTAGAACACAGTGTCTTTTAC-TTTGTCCTGGCTGTTCCAGGGAGCACTTTAGTTTTCTTCATTCTTCA  
TGTACTGTTACCTTTGGCACCACAGTATATAT-----  
-----  
-----  
-----  
-----CTTGT--ACCTGGTCTTGCATGGCATTAAAG  
CATCAGTCTTACCTAT-TTTGCTTCTT-----CTTACCTGTGTTGAACGACCATAGTGCTGCTTTTTGCAGATGATC  
TTTGGCCTAAGTCCCTGAGCT-GTCTTCACGGAGGCTCTTCTGGTTGGCAGCTCACCTCCCATCTTCATTTTTCTGA  
TGTTTGGCACTGACCTGCTTCC--CTGTTAGGTGAGACTGTT-ACAGACAGGGGCAACCAA--AATGGACCTTCTGC  
AGGGATTTGGATTCAATATGAAAA

>Dog  
CAAGTTATATAGCTATATGTATGCTTTTTATACTGGTATAAATGATGGCATTATCCAGTGAATTT-GACCTGGGAAAA  
AAAGATTTAAGCTGAAGAAATGTAATGTCTGCCAGAGGGCACAGGGGTAATTTGACAGAGAATATCAAGGTGTCCTTA  
TATACCCCATATTATCATAATTGAAATACCCATGCTCCAGGTAGATG-----TTTGTAAAGGTGTTAAATGC  
TGTT----AGCAGAAAAGAGAGTCTTGTGTTG-TTTGTCCTCAGAGTTCAGG-AGCACTCTTACTGTCCGGGTTCTTCT  
TGT-----CC-TATAACTTAT-----  
-----  
-----

-----  
-----  
-----CTTGC---TCTGGGATTTTACAGCATAAGG  
AGCATGTATTGGTTATCTTTGCTTTTTCTCATTTCGTTACCTGCACCAAATGGCAGTGGTGCTGCCTTTCCAGGTAGTC  
TGTGGCCTAACCTAGCCAGCT-CCCTTTGTGGTGGCACTTCCTGGTTGGTGGCTCACCTG--TGTCTTCCACCTCCTG  
CCCTCACCTCTGACCTGATGCCT-CCTTCCACTTACACGGCT-ACACAGGAGGCTTGAC-AA---GTGACACTTCCT  
ACGAA---AACTGAAA-----

## Marker M17

>MSTB1

```
-----  
-----tgctatagtttgatggttgc  
ccctccaaacctcatggtgaaatttgatccccagtggtggaggtggggcctaagggagggtggttgggtca-tgggg  
gcggatccctcatgaatagattaatgccctccctcggggggtgggatgagt-----  
-----  
-----gagttct-----cactctattagttcccgcgagagctgggtgttaaa  
aa-gagcctggcac-----ctcccctctctctctcttctctctctctcgcctatgagatctctgcacacgccggctc  
cccttcaccttccgcatgagtggaagcagcctgaggccctcaccagaagcagatgctggcgccatgcttcttctgaca  
gcctgcagaaccgtgagccaaataaacctctttctttataaattaccagcctcaggtattcctttatagcaacaca  
aatggactaagaca-----  
-----  
-----  
-----
```

>Human

```
AT-CGACTC---TCAGCAAGTAATTTTTAAAGCCTTCTAT-GTGCCAGGCTCTGCACGAGCTACTGTAAAATTTCAA  
AAGATAAGTAAAACGCAGTTCTTGCCAAACAAC-----TTTGAAA---CACAT---tgctaaggtctagatggttgc  
ctcctccaaacctcatggtgaaatttgatccttagtgctggaggtggtggcctaataaggagggtgactaggtca-tgggt  
gtggatcctttgtgactgattaatgccctc-ctttg-----tggtgagt-----  
-----  
-----gagttct-----tactctcttagatcctacaacagctgggtgttaaa  
aa-gagcctggcac-----ctccccttctctcttcttctcttcttcttcttctgcatgtaatctctgcacatgctggctt  
tccttcacctactgccatgagtggaag-agcctgaggccctcaccagatgcaactgctcaatcttgaactttc---ca  
ggcatcagaatcatgagccaaacaaactt--tttaaaaataaattaccagctcttctggtattatattttatagcaacaca  
aatggactaagaca---CACAT---TTATTTCATGAATGATAGATAACAATAGTTCATCATGAAGAGAACATGGTTG  
TGTAGATAATGGAATGAGCCTGATGAAGGTAAGGATGTTGATGATTAAGCTGGTGGGACAGACACAAAAGGTTTGTGTG  
AGGCTTATGTCATAT--GTTATGTAGAAAATACTTC-CTTCTTACATAAAAACTATTAATGTTGGTATT-AGTTTTT  
TATAATTCACATAACAAATAAGCATAACATTTAGCAA-----TATCTTTT---TATTACCTCACAGATGTGTAGGTGAG  
AAGTTTCAGGCTTATTCTGAATTAACGGTTTTCTCTACTCT
```

>Chimp

```
AT-TGACTC---TCAGCAAGTAATTTTT-GAAAGCCTTCTAT-GTGCCAGGCTCTGTATGAGCTACTGTAAAATTTCAA  
AAGATGAGTAAGATGCAGTTCTTGCCAAACAAC-----TTTGAAA---CACAT---tgtaaggtctggatggttgc  
ctcctccaaacctcatggtgaaatttgatcctaagtgctggaggtggtggcctaataaggagggtgactaggtca-tgggt  
gtggatcctttgtgactgattaatgccctc-ctttg-----tggtgagt-----  
-----  
-----gagttct-----tactctcttagaccctacaagagctgggtgttaaa  
aa-gagcctggcac-----ctccccctatctcttcttcttcttcttcttcttctgcatgtaatctctgcacatgctggctc  
tccttcacctaccgccatgagtggaag-agcccgaggccctcaccagatgcaactgctcaatcttgaactttc---ca  
ggcatcagaatcatgagccaaacaaactt--tttaaaaataaattaccagctcttctggtattatattttatagcaacaca  
aatggactaagaca---CACAT---TTATTTCATGAATGATAGATAACAATAGTTCATCATGAAGAGAACATGGTTG  
TGTAGATAATGGAATAAGCCTGATGAAGGTAAGGATGTTGATGATTAAGCTGGTGGGACAGACACAAAAGGTTTGTATG  
AGGCTTATGCCATAT--GTTATGTAGAAAATACTTC-CTTCTTACATAAAAACTATTAATGTTGGTATT-AGTTTTT  
TATAATTCACATAACGAATAAGCATAACCTTTAGCAA-----TATCTTTT---TATTACCTCACGTTTGTGTAGGTGAG  
AAGTTTCAGGCTTATTCTGAATTAACGGTTTTCTCTACTCT
```

>Orangutan

```
AT-TGACTC---TCAGCAAGTAATTTTTGAAAGCCTTCTAT-GTGTGAGGCTGTGCATGAGCTACTGTAAAATTTCAA  
AAGATGAGTAAGACATGGTTCTTGCCAAACAAT-----TTTGAAA---TGCAT---tgctaaggtctggatggttgc  
ctcctccaaacctcatggtgaaatttgatcctaagtggtggaggtggtggcctaataaggagggtgactaggtca-tgggt  
gtggatcctttgtgactgattaatgccctc-ctttg-----tggtgagt-----  
-----  
-----gagctct-----tactctcttagatcctatgacagctgggtgttaaa  
aa-gaagctggcac-----cttcccctctctcttcttcttcttcttcttcttctgcatgtaatctctgcacatgctggctt  
tccttcacctactgccatgagtggaag-agcctgaggccctcaccagatgcaactgctcaatcttgaactttc---ca  
ggcatcagaatcatgagccaaacaaactt--tttaaaaataaattaccagctcttgagtattatattttatagcaacacc
```

aaatggactaagaca---CACAT---TTATTCATGAATGCTAGAATCACAATAGTTCATCATGAAGAGAACATGGTTG  
TGTAGATAATAGAATGAGCCTGATGAAGGTAAGGATGTTGATGATTAAGCTGGTGAGACAGACACAAAGGTTTGTATG  
AGGCTTATGCCATGT---GTTATGTAGAAATACTTC---CTTCTTACATAAAAACTATTAATGTTGGTATT-AGTTTTC  
TATAATCCCATAACAAATAAGCATACATTTAGCAA-----TATCTTTT---TATTACCTCACAGTTGTGTAGGTGAG  
AAGTTCAGGCTTATTCTGAATTAACAGTTTTCTCTACTCT

>Baboon

AT-TGACTC-AATCAGCAAGTAATTTTTGAAAACCTTCTAT-GTGCCAGGCTCTGCATGAGCTACTGTAAAATTTCAA  
AAGATG-----CGGTTCTTGCCAAACACC-----TTTGAAA---CGCAT---tgctaaggctctggaggtttgt  
ctcctccaaacctcatggtgaaatttgattcctaaggttgagggtgtggtcctaataaggagggtgaccaggtaactaggt  
gtggatccttttgtgaactgattaaagcccta-ctttg-----tggtgaat-----

-----gagctct-----tactctcttagatcctatgacagccagttgttaaa  
aa-gagcctggcat-----ctccccctctctctgtcctcctttgttgccatgtaactcctcgcacatgctggctc  
tccttcacctactgcatgagtggaag-aggctgaggcctccaccagatgcaactgctcagtcttgaactttc---ca  
ggcatcagaatcatgagccaaacaaactt--taaaaaataaattacccaaccttggtgattattttatagcaacaca  
aaatggactaaggca---CACAT---TTATTCATGAATGATAGAATCACCATAGTTCATCATGGAGAGAACATGGTTG  
TGTAGATAATGGAATGAGCCTGATGAAGGTAAGGATGTTGATAATTAAGCTGGTGGGACAGACACAAAGGTTTGTATG  
AGGCTTATGACATAT---GTTATGTAGAAATACTTC---CTTCTCACATAAAAACTATTAAGTGTGGTATT-ACTTTTC  
TATAATCCCATAACAAATAAGCATACATTTAGCAA-----TATCTTTT---TATTACCTCACAGTTGTGTAGGTGAG  
AAGTTCAGGCTTATTCTGAATTAGCGTTTTCTCTACTCT

>Rhesus

AT-TGACTC-AATCAGCAAGTAATTTTTGAAAACCTTCTAT-GTGCCAGGCTCTGCATGAGCTACTGTAAAATTTCAA  
AAGATG-----CGGTTCTTGCCAAACACC-----TTTGAAA---CGCAT---tgctaaggctctggaggtttgt  
ctcctccaaacctcatggtgaaatttgattcctaaggttgagggtgtggtcctaataaggagggtgaccaggtaactaggt  
gtggatccttttgtgaactgattaaagcccta-ctttg-----tggtgagt-----

-----gagctct-----tactctcttagatcctatgacagccagttgttaaa  
aa-gagcctggcat-----ctccccctctgtctgtcctcctttgttgccatgtaactcctcgcacatgctggctc  
tccttcacctactgcatgagtggaag-aggctgaggcctccaccagatgcaactgctcagtcttgaactttc---ca  
ggcatcagaatcatgagccaaacaaactt--taaaaaataaattacccaaccttggtgattattttatagcaacaca  
aaatggactaaggca---CACAT---TTATTCAGGAATGATAGAATCACCATAGTTCATTATGGAGAGAACATGGTTG  
TGTAGATAATGGAATGAGCCTGATGAAGGTAAGGATGTTGATAATTAAGCTGGTGGGACAGACACAAAGGTTTGTATG  
AGGCTTATGCCATAT---GTTATGTAGAAATACTTC---CTTCTCACATAAAAACTATTAAGTGTGGTATT-ACTTTTC  
TATAATCCCATAACAAATAAGCATACATTTAGCAA-----TATCTTTT---TATTACCTCACAGTTGTGTAGGTGAG  
AAGTTCAGGCTTACTCTGAATTAGCGTTTTCTCTAC---

>Tarsier

AT-TAACTT-AATCAAAAAGTAATTTCTGAAAACCTTCTAC-ATGACAGAGTCTGGATTGGTTATTTTTAAAAATTTGA  
AAGATGAGAAAAGACTCAGCTCTTGTCAAATAAC-----TTTGAAA---CATGT---ggctatggcttgaatgtttgt  
cttcttttaaaattcatggtgaaatttgatctccaattttgaaagtgagacctaatgagaggtatttaggtca-tggga  
atggattcctcatgaatagatcagtgcctcttcttag-----atgtgagttcttactctattgctcctcctcctctt  
tttttttttccagttggagtctcactctgctcaccagactggagtgagttggctgctcccggccaccgcagcctcgac  
ctgctgggtctctggcaatccttctgctcagcctccatctattgctctcttaattcctggtagagctggctgttaaa  
aaagatcttggtagaggtacatcttccccctctctctctctcttctctctctcttattgcaatcctcgcacatgctagcta  
tcctctccttttcagtgagcagaaaa-c-----agtccctcatgagatgaggct-----tcttgaacttgg---ca  
gcatcagaatcctgagccaaatgaacctcctttctttataagttatccagtcttaggtgtc--ttcatagcaacaca  
aaatgtactaagaca---CAAAAT---TTATTCATGAATAACAG-----TTTCATCACAAGAAGAACACAGTTT  
CAGAGAAGAAGGAATGAGTCAGATAAAGATAAATATGTTGGTAACCTAAGGGGGCAGGGCAGACACAAAGGTTTGCCTG  
AGCCCTATATCATATCATGCTATGTAGGAAAAATTA-CATCTTACATAAAAACTACTAAATGTTAGCATC-AGTTTTTC  
TGTACATTCTATATCAAATAACCATAGATTTAGCAACGTAATATCTTTT---TATTATCTCACAGTTCTGTATATGAG  
ATGTCAGTGATTCTACGAGTTAGTTGTTTTTCTACT-

>Bushbaby

AT-CAACTT-AATCAATAAGTGGTTTTGGACAACCTTTCTAA-GTGCCAGCCTCTCCACTAGGTGCTACAAAAATTA  
AAGATGAGTAACACTCAGTTTTTCACTAAAACACATTTATTTGAAA---CACAT-----  
-----  
-----  
-----

```

-----
-----
-----
-----TTATTTGTGAGTGATCTAGTCACTATAGTTTCATCATGAAGAGAATGTGGCAA
TAACAATGATGGTATGAGGGAGGTCAAGGTAAGGATGTGGTTGACTGAGCTGGCAG-GAAGACACTAAGGTTTGGGTG
GGGCCTACTCCATATCATGTTACCTAGAAAAATTTTACCTGTTACATAAACACCATTAAATACTTATAAC-AGCTTTC
TATAGCTTTCAGGC-AATGACCATAAATGTACCAACG-TAATACCTTTTAATTATCATCTCCCATTTTGGTAAGTGAG
AAGTCCAGGCACACTAAGAGCCAGCTGTTTTCTCTACTC-
>Mouse_lemur
AT-CTACTC-AATCAACAAGTGGTTTTAGAAAACTTTCTAT-GTGCCAGGCTCTGCACTAGGTGCTACAAGAATTA
AAGATGAGCAAGACTAATTTCTTGCCAAAAAC-----TTTGAA---AACAT-----
-----
-----
-----
-----
-----
-----
-----
-----TCAATCATGAATGATCAAATCACAATAGTTCGTTAAGAGGAGAACATGGTGG
TAAAAAAGATGATATGAGGGAGATGAATGCAAGGACATGCATGACTAATCTGGTGGTGCCGACACTAAGGTTTGTGTG
AGGCCTATACCATATCATGTTATGTAGAAAAATTTTACTTATTACATAAAAACATTAAATGTTTGTATC-AGTTTCC
TATAGCTTTCATAACAAATAACTCTAAATTTACCAACTTAACACCCTTTAATTATCATCTCATGGTTCTGTAGATGAG
AAGTCCAGGAATATTGTGAGTCAACTATTTCTCCATTCC
>Tree_shrew
AT-CAAA-----TCAACAAGTGGTTGTTAAGAAGTGTCTAC-GTGGCAGGCTCTGCATTAGGTGCTACGAACATCTTA
CAAATGAGTTAGACTCAATTCCTACAGAAAAAT-----TTTGA-----AACA-----
-----
-----
-----
-----
-----
-----
-----
-----GAATGACAGAGTCACAATGGTTCATCACAGGGAGAAGATGAGTA
TGTGGAGGATGGGGTCAGGCAGGTGGAGATACAGATGTTGACAACCTGCGCTGCTGGGGCAGACAGTAAGTTATGTGTG
ACGCCCACACCATATCTTGTCTTGTAGGAAAGTTTTACTTCTTATATAAA--CCATTAAATGTTTGCATCCATTTTTC
AATAACTTCTATAA-AACCAACCATAAAGTTAGCAA-----CTTT--TATTGTCTTACAGTTTTGTAGGTGAG
GATTCTGGGCA-----CAGCTGTTTTCTCTACTT-
>Dog
ATGCATCTCAAAGCAACAAGTGAATTATTGAAGACTTATTATAGTGCCAGGTTCTACCCAGGTACTATGAAAATTA
ACAATGACTAAGTCTCAGTTCCTTGCCAAAAACC-----TTTGAA---CACAT-----
-----
-----
-----
-----
-----
-----
-----
-----TTACTCATGAGTCATAGAGTCACAATTTTCTCACAAAAAGAGCACAGTGG
-AAAGATGACACGATGAGGCACAGGCAAGTCAGAATGTTGATGACTATGCTGGCAGG-TGGATAGTAAGTTTTGTGTG
AGGCCTATACCATGTCTGTTATTATAGGAAATTTTACTTCTTATATAAAAGCTAAT---GTTTGA---GTTTTT
TAGGGTTTTCCAAAAAAACAACCACAAATTTGGCAACTTAATAC-CTTT--TATCAGCTCTTAGTTCTGCCCGTGAG
AAGTCTAGGTGTAGCCTGGCTCAACTGTTTTTCTCTTAC

```



TATAAAAGAGGGAT-TATGTATA-----TAGAGAA---AAGAAGAGT  
GAATTAAG-----GAAAGAACTTAAGGAATGTGGAA-TT-----AAG-AAGAGCAGGAAGGAGACTCC  
AGAAGAGAGGTTGAGATGGAA--CCATCAGAGTTAGGAGAAAGAATCAATGAATAACATCAAATAACCCAGA-TTT--  
---TG-GGG---AG-----TGATGCTCAAATGTTGTAG---TGGTG---atatataatttggatgtttgcct  
tccaaatctcatggtgaaatttgatcctgaacattggaggtgg-acctggtgggaggtgtttgggtcatgggt-ctga  
ttcctcataagtggcttgac--gctgccttgacagtaataaatgaactcttgctctattcgttcctgagagatctg-at  
tgtaaaaggagcctggcatctc-cacctatctctcttgctcccactctctccatttgacatgactgcaccccttg  
ccttttgccatgaataaaaagattcctgagatccttaccagaa-----acagatgcctgtgcatgcct---ataaagc  
ctacagaactgtgagccaaataaaaactccttttaaaataaattactcagcctcaggtatttcctttatagcaatgcaa  
-aatggaccaagaca---TGTGG---TACCATAAATGATAATGACACAT-----TT-GTTTAAATAATGA  
TGTGTTGACTAAACTTTGG---AGAACCAATTGCACAAAATGTTGGAAGTTTAAACAGATTTTACAGATTTGGAGAT  
CAAATGAGAGATAGTTGAGTAACTATTTGCAGTTATT---TGTTTTCAATGAGTGTGGATAATCTGCCTCAGAATTT  
GACTTTAAG-AGAAAAGGAGAAAACTAAA-GAGTAAAAATCAAAGAGAGTGATTAGAGTTAAAGCAGT

>Baboon

AACAGTTAAAGGCTGTTT--AGCAACCAAATATGCATCAGGCACAGATTTATGGGGAACATATTTGAAAGAAAAGAAG  
GTGGATTTAGTTTTGAATATTTAGGGCTTGTGATGCCTATAGAATGTTCAAGTGGGA-ATGTCCAGTGGGCAGATAGAA  
TTGCAGCTCTGGAGAGATTTTGGACTTGGGGATAAGATTTTGGGAAGTCAGCATCTAAGGGGGAGTTGGACCTCTGGA  
TACAAAAGAGGGGT-TATGTATA-----TAGAGAA---GAGAGGAGT  
GAATTAAG-----GAAAGAACTTAAGGAATGTGGTA-TTGGGAATTTAATTAAG-AAGAGCAGGAAGGAGACTCC  
TGAAGAGAGGCTGAGATGGAA--CCATCACACTTAGGAGAAATAATCAATGAATGGCATCAAATAACCCAGA-TTT--  
---GG-GGGCG-GG-----TGATGCTCAAATGTTGTAG---TGGTA---atatgtaatttggatgtttgtgctc  
tccaaatctcatggtgaaatttgatcctgaacattggaggtgg-acctggtgggaggtgtttgggtcatgggggcaga  
ttcctcataagtggcttgat--gctgccttgacagtaagaaatgaactcttgctctatttgctcctgagaggtctg-at  
tgtaaaagaagcctggcatctc-cacctatctctcttgctctcactctctccatttgacatgactgtaccgcttg  
ccttttgccatgaataaaaagcttctgagatccttaccagaa-----acagatgccagtgcctgcct---atgcagc  
ctaccaaactgtgagccaaataaaaactccttttaaaataaattactcagcctcaggtatttcctttatagcaatgcaa  
-aatggaccaagaca---TGTGG---TATCATAAATGATAATGACAGAT-----TG-GTTTAAATAATGA  
TGTCTTGACTAAACGTTGG---AGAAACAGTTGCACAAAATGCTGGAAGTTTAAACAGATTTTACAGATTTGGAGAT  
CAAATGAGAGATAGATGCGTAACTATTTGCAGTTATT---TGTTTTCCAGTGTGGATAATCTGCCTCAGAATTT  
GACTTTAAG-AGAAAAGGAGAAAAAGTAAA-GAGTAAAACTGAAAGATAGTGATTAGAGTTAAAGCAGT

>Rhesus

AACAGTTAAAGGCTGTTT--AGCAACCAAATATGCATCAGGCACAGATTTATGGGGAACATATTTGAAAGAAA-GAAG  
GTGGATTTAGTTTTGAATATTTAGGGCTTGTGATGCCTATAGAATGTTCAAGTGGGA-ATGTCCAGTGGGCAGATAGAA  
TTGCAGCTCTGGAGAGATTTTGGACTTGGGGATAAGATTTTGGGACTTCAGCATCTAAGGGGGAGTTGGACCTCTAGA  
TACAAAAGAGGGGT-TATGTATA-----TAGAGAA---GAGAGGAGT  
GAATTAAG-----GAAATAACTTAAGGAATGTGGTA-TTGGGAATTTAATTAAG-AAGAGCAGGAAGGAGACTCC  
TGAAGAGAGGCTGAGATGGAA--CCATCACACTTAGGAGAAATAATCAATGAATGGCATCAAATAACCCAGA-TTT--  
---GG-GGGCG-GG-----TGATGCTCAAATGTTATAG---TGGTA---atatgtaatttggatgtttgtgctc  
ttcaaatctcatggtgaaatttgatcctgaacattggaggtgg-acctggtgggaggtgtttgggtcatgggggaaaa  
ttcctcgtaaagtggcttgat--gctgccttgacagtaagaaatgaaatcttgctctatttgctcctgagagatctg-at  
tgtaaaagaagcctggcatctc-cacctatctctcttgctctcactctctccatttgacatgactgtaccgcttg  
ccttttgccatgaataaaaagcttctgagatccttaccagaa-----acagatgccagtgcctgcct---atgcagc  
ctaccaaactgtgagccaaataaaaactccttttaaaataaattactcagcctcaggtatttcctttatagcaatgcaa  
-aatggaccaagaca---TGTGG---TATCATAAATGATAATGACAGAT-----TG-GTTTAAATAATGA  
TGTCTTGACTAAACGTTGG---AGAAACAGTTGCACAAAATGCTGGAAGTTTAAACAGATTTTACAGATTTGGAGAT  
CAAATGAGAGATAGATGCGTAACTATTTGCAGTTATT---TGTTTTCCAGTGTGGATAATCTGCCTCAGAATTT  
GACTTTAAG-AGAAAAGGAGAAAAAGTAAA-GAGTAAAACTGAAAGATAGTGATTAGAGTTAAAGCACT

>Marmoset

AGGC-----TGTTT--GGCAACCAACTATGCATCAGGCACAGATTTGTGGGGAACGTATTTGAAAGAAAAGAAG  
GTGGATTTGTTTT-----GCCTATAGAATGTTCAAGTGGGA-ATGCCAGTGGGCAGATAGAA  
TTGCAGCTCTGGAGAGATTTTGCCTTGGGTATACGATCTGGGGACATCAACATCTAATGGGGAATTGGACCTTTGGA  
TATAAAAGAGGGAT-TCTGTGTA-----TAGAGAA---GAGAGCAGT  
GAACTAAG-----GAAAGCACTTAAGGAACATGGAA-TTCAGAATTTAATTAAG-ACCAGCAGGAAGGAGATTGC  
TGGAGAGAGG-----AATCAATGAGTGGCATCAAATAACCCAGA-TTT--  
---TG-GGG---GG-----TGTTGCTCAAATGTTGTAG---TGGTC---gtatataatttggatgttt-----  
-tcatatctcactttgaaatttgaaactgaacattggaggggg-acctcgtgggaggtgtttgagtcagggg-----  
-----gcagatttggagtaatagatgagctcttgctctattcagatccttagagatctg-at







## Marker M20

>MSTB1

```
-----  
-----  
-----  
-tgctatagtttgggatgtttgtcccctccaaacctcatggtgaaatttgatccccagtggtggaggt-ggggccta  
gggaggtgtttgggtcatggggcggatccctcatgaatagattaatg-----ccctccctcggggggtgggatgag  
gagttctcactctattagttcccgcgagagctgggtgtaaaaagagcctggcacctccctcctctctctcttgc  
ctctctcgccatgtgatctctgcacacgcggctccccttcacctccgccatgagtggaagcagcctgaggccctca  
ccagaagcagatgctggcgccatgcttctgtacagcctgcagaaccgtgagccaaataaacctcttttctttataa  
ttaccagcctcaggtattcctttatagcaacacaaaatggactaagaca-----  
-----
```

>Human

```
TTCCACCCTTTAACCAATATCTAAAA-CTTC-CCCCAGGACTATTCTAGGGTATCATGACTCAGGGATT-----  
-AT-----CCT-----GAGATT---  
---TAGTTGAA-TTCTTCTTTCTAGATCT--GTCAGTGATTCATAGAGGCAGTTAGCAGGAACTGAAG---ATACC--  
-aggcataatttggatatttgttccctccaaatctcatggtgaaacttgatccctaagtgtgaaggt-ggggcctagt  
gggaggtgcttgggtcatggaggcagatccctcatgaatgacttgctgcccccttgtccccatcccacagtaatgag  
gagtactccctccattagatcacctgatagctggctggttaaaagagcatggcacccctccccctctctctc--ttt  
ttccttctcc----ctggccacctgatggttgcctcccttctgcatgctggaagcttccctgaagccctca  
gcagaagcagatgctgggtgccatgcttctgtacatcctgcagaactatgagccaaataaacctcctttctttataa  
ttaccctgccccaggtattcctttatagcgatgcaa--tacactaagaca---ATACC---CAAGATTCAAATGCATG  
CACGCAATATGTCGTTAAGCTTCC-----TTCTA-----AGAGCCATATGAGATAGGATCATTACTTAGCAGGGCT  
CATTCTCCATCAGTTCTTACACAGACTTGT
```

>Chimp

```
TTCCACCCTTTAACCAATATCTAAAA-CTTC-CCCCAGGACTATTCTAGGGTATCATGACTCAGGGATT-----  
-AT-----CCT-----GAGATT---  
---TAGTTGAA-TTCTTCTTTCTAGATCT--GTCAGTGATTCAGAGAGGCAGTTAGCAGGAACTGAAG---ATACC--  
-aggataaatttggatatttgttccctccaaatctcatggtgaaatttgatccctaagtgtgaaggt-ggggcctagt  
gggaggtgcttgggtcatggaggcagatccctcatgaatgacttgctgctcccccttgtccccatcccacagtaatgag  
gagtactccctccattagatcacctgatagctggctggttaaaagagcatggcacccctccccactctctctc--ttt  
ttccttctcc----ctggccacctgatggttgcctcccttctgcatgctggaagcttccctgaagccctca  
gcagaagcagatgctgggtgccatgcttctgtacatcctgcagaactatgagccaaataaacctcctttctttataa  
ttaccctgccccaggtattcctttatagcgatgcaa--tacactaagaca---ATACC---CAAGATTCAAATGCATG  
CACGCAGTATGTCGTTAAGCTTCC-----TTCTA-----AGAGCCATGTAAGATAGGATCATTACTTAGCAGGGCT  
CATTCTCCATCAGTTCTTACACAGACTTGT
```

>Orangutan

```
TTCCACCCTTTAACCAATATCTAAAA-CTTC-CCCCAAGACTATTCTAGGGTATCATGACTCAGGGATT-----  
-AT-----CCT-----GAGATT---  
---TAGTTGAA-TTCTTCTTTCTAGATAT--GTCAGTGATTCATAGAGGCAGTTAAGAGGAACTGAAG---ATACC--  
-aggatagtttggatatttgttccctccaaatctcatggtgaaatttgatccctaagtgtgaaggt-ggggcctagt  
gggaggtgcttgggtcatggaggcagatccctcgtgaatgacttgctgctcccccttgtccccatcccacagtaatgag  
gagtactccctccattagatcacctgatagctggctggttaaaagagcaggtgccccctccctactctctctc--ttt  
ttccttctcc----ctggccacctgatggttgcctcccttctgcatgctggaagcttccctgaagccctca  
gcagaagcagatgctgggtgccatgcttctgtacatcctgaagaactatgagccaaataaacctcctttctttataa  
ttatcctgccccaggtattcctttatagtgatgcaa--tacactaagaca---ATACC---CAAGATTCAAATGCATG  
CACGCAATATGTCGTTAAGCTTCC-----TTCGA-----AGAGCCGTGTAAGATAGGATCATTACTTAGCAGGGCT  
CATTCTCCATCAGTTCTTACACAGACTTGT
```

>Baboon

```
TTCCACCCTTTAATCAATATCTAAAA-CTTC-ACCCAGGACTATTCTAGGGTATCATGACTCAGGGATT-----  
-AT-----CCT-----GAGATT---  
---TAGTTGAA-ATCTTCTTTCTATATCT--GTCAGTGATTCATAGAGGCATTTTGCAGAACTGAAG---ACACC--  
-aggataaattgggatatttgttccctccaaatctcaagttgaaatttgatccctaagtgtgaaggt-ggggcctagt  
gggaggtgcttgggtcatggaggcagatccctcatgaatcacttgggtgttcccttgtcccccaaccacagtaatgag  
gagtactctctccattagtttacctgatagctggctgcttaaaagagcaggtgctccccactctctctctctt
```

ttccttctcc----ctggccacatgatgtttgccccctttcccttctgtcatgcgtggaagcttcctgaagccctca  
gcagaagcagatgctgggtgccctgcttcttggttcacctgcagaactgtgagccaaataaacctcctttctttataaa  
ctaccttgccccaggtattactttatagtgatgcaa--tacactaagaca---ATATC---CAAGATTCAAATGCATG  
CACGCACTATGTTG-TAAGCTTCC-----TTCTA-----AGAGCCATATAAGATAGGATCATTATTTAATAGGGCT  
CATTCTCCATCCATTCTTACACAGACTTGT

>Rhesus

TTCCACCCCTTAATCAATATCTAAAA-CTTC-ACCCAGGACTATTCTAGGGTATCATGACTCAGGGATT-----  
-AT-----CCT-----GAGATT---  
---TAGTTGAA-ATCTTCTTTCTATATCT--GTCAGTGATTCATAGAGGCATTTTGCAGAAACTGAAG---ACACC--  
-aggataattgggatatttggttccctccaaatctcaagttgaaatttgatccctaagtgtgaaggt-ggggcctagt  
gggaggtgttttggatcatggaggcagatccctcatgaatgacttgggtgttcccttgtccccaaccacagtaagt  
gagtactctctccattagtttatctgatagctgactgctttaaagagcatggcaccgctcctcactctctctctt  
ttccttctcc----ctggccacatgatgtttgccccctttcccttctgtcatgcgtggaagcttcctgaagccctca  
gcagaagcagatgctgggtgccctgcttcttggttcacctgcagaactatgagccaaataaacctcctttctttataaa  
ttaccttgccccaggtattactttatagtgatgcaa--tacactacgaca---ATATC---CAAGATTCAAATGCATG  
CACGCACTATGTTG-TAAGCTTCC-----TTCTA-----AGAGCCATATAAGATAGGATCATTATTTAACAGGGCT  
CATTCTCCATCCGTTCTTACACAGACTTGT

>Marmoset

TTCCATCCTTTAACCAATATCTAACA-C-----CCTAGGACTATTCTGGGGTATCAAGACTTAGGGATT-----  
-AT-----CCT-----  
-----GTTGAA----TTCTTTCTAGATCT--GCCAGTGATTCACAGAGGCAGTTAGAGGGACTTGAAG---ATACC--  
-agataaatttgaatatttggttccctccaaatctcaggttgaaagttgatccctaattttgaaggtgggggtctagt  
gggaggtgttttcatcatagaggcagatccttc-----acttgtgtccctctgtcccccacacagtgatgagt  
gagatctccctctcttaattcacctgatagttggctgtttaaagagcatggcactcctcctc-----ccctc--ttt  
t-----tcc----ctggccatgtgatgtttgtcctcctcctcctccttctgcatggaatcttctgaagccttca  
gcagaagtagatgctgtctgtccttctgtacatcttgcagaactatgagccaaataaacctcctttctttataaa  
ttaccctgccccaggtattcctttacaccgatgcaa--tagactaagaca---ATATC---CAAGATGCAAATGCAGA  
CATGCAATATGTTG-TAAGCTTAT-----TTTTA-----AAAACCGTATCAGATAGGATCATTACTTAGCAGGGCC  
CATTCTCTGCGAGCTTTTACACAGACTTGT

>Tarsier

TTCCATCTCTCAATCAATATCTAAAA-CTTCTTCCCATGGCTTTTTCTATGGTATCATGGCTTAAGATTT-----  
-AT-----TCTCTGGGT-----TTGAAATT---  
---TAGTTGAA-CCCCT-TTCCAGATCT--GTCAGTGATTTGTAGACACCGTTAGCAGGAACTGAAC---ATACC--  
-caatataagtttgaatatttggttccctccaaatctcatggtgaaatttgatacccaaagttggaggt-atggccaagt  
-ggaggtgttttggatcatgg-ggcgaattcctcatgaatggctggctgcccgc-----actgcggtaatgagt  
gaat-----tttgatt--ctagtaactgggtgtttaaagagcatggcaccctctcctttctctctc--ttt  
ttcttcttcc----ctcactgtgtcaagccagcttcccttccctttatgcagtgagc-gaagtttctgaagccctta  
ccagaatcagatgctgggtgccatgcttcttgaaacagcctgcagaacatgagccaaagtaaaccttattttctttattga  
ttattcagccgcaggtattcctttacagcaacacag--tgggctaagaca---ATATC---CAAGATTCAAATGTGTG  
CATGTGGTATGTCTGTAAGCTCCCT-GAATTCTA-----AGATCCCTGAAAGTAA-----  
-ATTCTCTATCAGTTCTTACACAGA-----

>Bushbaby

TTCTTCTCTCAACCAACAGCTAGAC-TTCC-TCCTAAGGCTGTTCTAGGGTATTGTGGCTTGGAGATT-----  
-ATTCTCTGGGCTCT-----GAGATT---  
---TAGTTGAC-TCCTTCTTTCCAGATCT--GTCAGTGATTTGTAGAGGTAAGTAGC-GGAAATGAGG-----  
-----  
-----  
-----  
-----  
-----ATACC---CA-GATTCCAGTATGTA  
TACCTGATATATCC-TGAGCTCTCTCCAATCCTA-----AGAGCCCTACAAAATACAATCATCTACTTAGCAGGGCC  
ATTTCTCTGTCAATTCTCATGCAGAACTGT

>Mouse\_lemur

TGCCATCTCTCAACCAATAACTAAACATTCC-TCCTAAGGTTATTCTAGGGTATCATGACTCAGAGATT-----  
-AT--ACTGAGTCT-----GAGATT---  
---TAGTTGAC-TGCCCTTTCTAGATCT--GTCAGTGATTTGTAGAGGCAGCTAGCAGGAGCTGAAG-----





AAGGATTTACACTGTCTGAGGCTTAGAAAAGCTGTGTGAATTGCTTGTCTTTAGGAAAGAGTTTCAGT---CAGCA---  
GAAGTTATCTTGTCACTGAGAAGGT-GAAGTGATTCTTTACCTAAGACTGTGAAATCAATATGTCAACTGAGTTCTA  
AATGTAATTCACC---ATGCT---tgctatagtttggatataatga-tcctccaaatttctgttgaaatttgatcccc  
aacattggagctgaagcctaataaggaggtgttgggtcatgggg-tagatccctcatgaa-----tggccttgactg  
cctcacagaaatgagtgagttattgttctattagttccct-gagggctgggtggtt--caagaagctggcgcttccctc  
cttctctcctgcctcctcctct-----tgcattgtagtctgcacaaattga-cacccttttgccttccaccatga  
gtggaagcagcctg-aacaccctttagaagcaagtgtggcaccatgcttcttgcacaacctgta-aactgtgaagca  
ggtaaacctttatactttataaattaactatgctcagacattactttatagcaacacaa-acagactaagaca---AT  
GCT---CAATCAGCTGGCAAAATCTTACATTTATGTGCTGGGAGC-----TTAGTCCTTTTGGGCTGCCGTAAC  
AAAATGCCCT-AGACTGGATTGCTTATAA-----ACCATGGGAATTTATTTCTCACGGTTGTGGAATCAGAGAAGTCG  
AAGATCAAGGCAACAGCTGATTCTGTATCTGGTGAGGACCTGATTTCTGATTACAGATGGCACCTTCTTGTGTATC  
CTCAGGTAGTGAAGGGGC-----AAGGCATTAATATTACTCATGAAGACTCTTA  
CCCCATGACCTAATCACCTCCACAGGCTGTATTTT

>Orangutan

ATAGGAAATGATTAAGAGAGAA---AGACTCACTTACAAATGAAGAGAGGCATCAATGTAGTCAACCTTTGCTTATAT  
CTGTTCTTGAGGGAATGA-GTGGATTGCTATAACCAGCATGTCAATTTCAAATAAATTCTGTTTACTTCCAGGATGGAT  
TTTAG-TTCTTTCTATGACAGTGGGAGGCTTTGCTCTGGGAATTCACAAGATATTAAGAAAAACCATACAGCCTG  
AAGGATTTACACTGTCTGAGGCTTAGAAAAGCTGCGTGAATTGCCTGTCTTTAGGAAAGAGTTTCAGT---CAGCA---  
GAAGTTTTCTTGTCACTGAGAAGGT-GAAGTGATTCTTTACCTATGATTGTGAAATCAATGTGTCAACTTAGTTCTA  
AAGGTAATTCACC---ATGCT---tgctgtagtttggatataatga-tcctccaaatttcatggttgaaatttgatcccc  
accattggagctgaagcctaataaggaggtgttgggtcatgggg-tagatccctcatgaa-----cggccttgactg  
cctcacagaaatgagtgagttattgttctattagttccct-gagggctgggtggtt--caagaggtggcaattccctc  
ctctctctcttgcctcctcctct-----tgcctgcacaaaccag-ctctcttttgccttccaccatga  
gtggaagcagcctg-aacaccctttagaagcaggtgtggcaccatgcttcttgcacagcctgta-aactgtgaagca  
ggtaaacctttatactttacaaattaactaggtcagacattcttcatagtaacagaa-acagactcagaca---AT  
GCT---CAATCAGCTGGTAAATCTTACATTTATGTGCTGGGAGC-----TTAGTCCTTTTGGGCTGCCGTAAC  
AAAATGCCCT-AGACTGGTTGCTTATAA-----ACCATGGGAATTTATTTCTCACAGTTGTGGAATCTGAGAAGTCC  
AAGATCAAGGCAACAGCAGATTCTGTATCTGGTGAGGCTGATTTCTGATTACAGATGGCACCTTCTTGTGTATC  
CTTAGGTGGTAGAAGAGGC-----AAGGCATTAATCTCATTTCATGAAGGCTCTTA  
CCCTCATGATCTAATTACCTCCACAGGCTGTATCTC

>Rhesus

AAAGGAAATGAGTAAAAGAGAA---AGGCTCACTTACAAATGAAGAGAGGCATCAATGTAGTCAACCTTTGCTTGTAT  
CTGTTCTTGAGGGAATGA-GTAGATTGCTATAACCAGCATGTCAATTTCAAATAAATTCTGTTTACTTCCAGGATGGAT  
TTTAG-TTCTTTCTATGACAGTGGGAGGCTTTGTTCTGGGAATTCACAAGATATTAAGAAAAACCATACAGCCTG  
AAGGATTTACACTGTCTGAGGCTTAGAAAAGCTGTGTGAATTGCTTGTCTTTAGGAAAGAGTTTCAGT---CAGCA---  
GAAGTTATCTTGTCACTGAGAAGGT-GAAGTGATTCTTTACCTAAGACTGTGAAATCAATATGTCAACTGAGTTCTA  
AATGTAATTCACC---ATGCT---tgctatagtttggatataatga-tcctccaaatttctgttgaaatttgatcccc  
aacattggagctgaaccctaataaggaggtgttgggtcatggag-taaatccctcatgaa-----cggccttgactg  
tctcacaaaaatgagtgagttattgttctattatttccct-gagggctgggtggtt--caaaaagctggcacttccctc  
cttctctcctgcctcctcctct-----tgcattgtagtctgcacaaattga-ctcccttttgccttccaccatga  
gtggaagcagcctg-aacaccctttaaaagcaagtgtggcaccatgcttcttgcacaacctgta-aactgtgaagca  
ggtaaacctttatactttataaattaactatgctcagacattactttatagcaacacaa-acagactaagaca---AT  
GCT---CAATCAGCTGGCAAAATCTTACATTTATGTGCTGGGAGC-----TTAGTCCTTTTGGGCTGCCGTAAC  
AAAATGCCCT-AGACTGGATTGCTTATAA-----ACCATGGGAATTTATTTCTCACAGTTGTGGAATCAGAGAAGTCC  
AAGATCAAGGCAACAGCTGATTCTGTATCTGGTGAGGACCTGATTTCTGATTACAGATGGCACCTTCTTGTATATC  
CTCAGGTAGTGAAGGGGA-----AAGGCATTAATATTGTTTCATGAAGACTCTTA  
CCCCATGACCTAATCACCTCCACAGGCTGTATTTT

>Marmoset

ATAGCAAAAAGTTAAAAGAGAA---GGAATCATTACAAATGAAGAGAGGCATCAATTTAGTCAACCTTTGCTTATAT  
ATGTTCTTGAGGGAATGA-GCGGATTGCTATAATTAGAATGTCAATTTCAAATAAATTCTGTTTACTTCCAGGATGAAT  
TTTAG-TTCTTTCTATGACACTGGGAGGTTTTGTTCTGGGAATTCACAAGATATTAAGAAAAACCATACAGCCTG  
AAGGATTTACACTGTCTGAGGCTTGAAAAGCTGTGTGAATTGCCTGTCTTTAGGAAAGAGTTTCAGT---TAGCA---  
GAAGTTATCTTGTCACTGAGAAGGT-GAAGAGATTCTTTACCTAAGATTATGAGATCAACATGTCAACTGAGCTCTA  
AATGTAACACACT---ATGTT---tgctatagtttggatgtagta-tcctccaaatttctgttgaaatttgatcccc  
aacatgggagttgaagcctaataaggagatgtgtaggtcatgggg-tatatccctcgtgaa-----tggccttgactg  
actcacagatatgagtgagttattgtctatcagttccct-gagggctgggtggtt--cgagaagctgagacttccctt  
ctctctctc--acctcctcctct-----tgcattgtagtctatacaaaactga-cttcttttgccttccactatga

gtggaagcagcctt-aacacccttcagaagcaggtgctggcatcatacttcttgacacaacctgta-aactctgaagca  
ggtaaacctttatactttataaattaactagcctcagacattcctttataacaacacaa-acaggcaagaca---AT  
GCT---CAATCATCTGGTGAAATCTTACATTTATGTGATGGGAGCTGA-CTGCTTTAGTCCTTTTGGGCTGCTATAAC  
AAAATGCCCT-AGACTGGGTTGCTTATAA-----ACCATGGGAATTTATTTCTCACAGTTCTGGAACTGAGAAGTCC  
AAGATCAAGGCAACAGCAGATTCCGTATCTGGTGGGGCCCTGATTTCTGATTCACAGATGGCACCTTCTTGT---ATC  
CTCAGGTGGTGGAAAGGAC-----AAGGCACTAATCTCATTTCATGAAGGCTCTTG  
CCCTCATGATCCAATCACCTCCCACATGCTCTATCTC

>Tarsier

ATAGTGAATAATT--AGGTATA---AGGATCACTTAAAAATGAAGACAAGCAT-ATT--AGTCAACCTTTACATTTAC  
CTGCTCTTGAGGGAATGA-GTGGATTGTTATCACCAGCATGTATTCCAAATAGTTCTGTCTGACTTCAGGATGGAT  
TTTAGTTTTTTTTCTATGACAATCAAAGGCTTTGTTCTGGGAATTCACAAGATATTTAAAAGAAAAACCGTGCAGCCTG  
AAGGATTTCTCACTGTCTCAGGCCCGAAAACGTGTGAATTGTCTGTCTTTAGGGAAGACTTTAGTCTGCAGAA---  
GAAGTTATCTTGTCACTGAGAAGGT-GAAGTGATTCTTTCATGAAAACTGTGAAATCAATATGTCAACTGAATTTTA  
AATGTAATCCACC---ATGCT---tgctagagtttggatagatga-cc-----aacctcatgttgaaatttgatcctc  
agtgttagaggtg-agcgtaatggaaggtgtttgggtcatgggg-cagatctttcatgga-----tgacttggtgtca  
ccctctggtaagagtgagttctcactctatctatccctccagggctgggtgttgaaaagagtggtgaccttctc  
ctctctctcttgcctctctctt-----catgctgtgatctctgaacacaccag-ttcccttggccataccttataa  
gtggaagcagcctatgcctctcatcagaagcaggtgctggtaccatgctcttctgtacagaccgcagaacactgagcca  
aataaatgttggttcccttataaatgaccagcctcaggtgttccctttagcaacacaa-acatattaagaca---TT  
ATT---CCCTTAACTGGTGAAATCTTACATTTATGTGCCAGGAGCTGACCTCCTTAAAGACCTTTTGGGCTGCTATAAC  
AAAATGCCAT-AGAATGACTGGCTTATGG-----ATAAGAGGAATTTTGTCTTACAGTTCTGGAGGCCAGGTAGTTT  
AAGATCAAGTCACCAGCAGGCTTCCGTATCTGGTGAGAGACTGCTTTCTGGTTTCATGGATGGCACCTTCTTATGGTGTC  
TTCAAGTGGTGGAAAGGTACAAGGCAACTCTCTGGG-GCTCTGTTATAAAGGCACTAATACCTTTTCATGAAGG-TTTTG  
CCCTTATGACCTAATCATCTCCTAAAGGCTGCACCTC

>Bushbaby

GTAATGAATAATTAAGACAGAA---GGAATCGCCAG----TGAAGAGATGCTTCATTTTCAGTCAAAGTTTGTCTGTAT  
CTGTTCTTGAGGGAAGA-GTGGATTACCATGACTAGCATGTATTCCAAGTAATTCTGTGCGACCACAGAATATAC  
TTTAG-TTCCTTCTTGCGGTGGAAGGCTTTGTTCTGAGAATTCACAAGATATT-AAAGAAAAACCATATGGCCTA  
AAGGATTTATATGGACTAAGACCTGGAAAGCTGTGTGTTGGTGCCTGTTTTTGGGAAGAGTTTCAGT---CAGCA---  
GAAGTTACCTTGTGGTGAGAAGCT-GAAGTGATTCTTTTACCAAAGGTTGGGAAATCAATATGTCACTGAATTTCTA  
AATTTAACTCACC-----  
-----  
-----  
-----  
-----  
-----

-----AT  
GCT---CACTGGGCTGGTGAAAGTTGTACATTTATGTGCCAGGACC-TG-GTGACTTACTCTTTTGGGGCTGCCATCAT  
AGACTG-----GGT---GGTGGCTTTTAAAAAATAAAATAGCAATTTATTTCTTACAGGTCT-GAGGCTGGGAAGTCC  
AAGATGAAGACACCATCAGACTCAGTGTCTGGTGAGGGCTGACTTCTGGGTTTCACGGAAGGAACACA-----T  
CTTCAGGGACAGAAGAGGTAAGGCAGATCTCTGGGCCCTTTTATAGGAACGCTCATCTATTCTCTGATGACTCTTG  
TACTCATAACCTAATGACCTCCCAAAGGCACCGTGTCT

>Mouse\_lemur

ATAGTGAA----TAAGGGAGAA---GGAATCAGAAA----CGAAGAGATG-TACATTTTCAGTTAAACTTTGCTTTATAT  
CTGCTCTTGAGATAAAGA-GTGCAT-----GTCAGTATGCCATTTCCAATAAATTTGTTTACTTCAGGATGTCT  
TTTAG-TTCCTTCTATGGCAATGGAAGACTTTGTTCTAGGAATTCATAAGATATTTAAAAGAAAAACACACAGCCTA  
AAGGATTCACACTGACTGAGATCTGGAAAGCTGTGTAGATTGCCTGTCTTTAGGGA--AGTTTAGT---CAGCAGAA  
GAAGTTATCTTGTCACTGAGAAGCT-GAAGTAATTTCTTTTACCAAAGGTTGTGAAATCAATATGTCAACTGAATTTCTA  
AATGTAATCTACC-----  
-----  
-----  
-----  
-----

-----AT  
GCT---CAATCAGCTGGTGAAATTTGTACATTTACATGCCAGGAGC-TGCCTGTCTTACTCTTTTTGGGCAGCTGTAAC  
AAAATGCCAGCAGTCTGGGTGGCTTATAAAA---AAAATAGCGATTTATTTCTCACAGTTCTGGAGGTTGGGAAGTCC  
AAGATCAAGACATAAGCAGATTAAGTGTCTGGTGAGGGCTTGTGCTCCGGTTCATAGATGGCACTTGTCTGTGTT  
CTTAGGGGGTGAAGGGGCTGGGCAGACCTCTGGGCCCTTTTATAAGGGCACTAGTCCCATTCTCTGATGGATCTTG



CCCTCATGACCTAATTACCTCCCAAATGTGCCACCTC

>Dog

ATAGCAAATGGTTTTAATGGG---AGAATCACTTATAAATGAAGAAATGTG---TTCTATCGATTTTTGTTTCATAT  
CTGTTCTTGAGGAAAAGAAGTAGATTGCCATAACTAGTGTATCATTTCCAAATAATTCTGTATGATTCCAGGATGGAT  
TTTAA-TTCCTTCTTATGACAAT-GGAGGCTTTGTTCTGGAAATTCACAACTGTTAAAAGAAAACTATATAGACTA  
AAGGATTTGTGCTGACTGAGGACTGGAAAGCTATATAAATTCCTGTCTTTAGGGATGACT--AGT---CAGCAGAG  
GAAGTCATCATGTACAGAAAAGCTGGAAGTGATTCTTTCACCAAATGTTGTGAAATCAATATGCCAATTGAACTCTA  
AATGTAATCTACC-----

-----AT  
GTT---TGATCAACTGGTGAAC TTGTACATTTGTGTGCCAG-----

>Horse

ATAGTG-ATTATTTTAAAGGGAGAAAGAATTACCTACAAATGGAAAGATGCATTG-CTTTATCAATCTTGGCTTATGT  
GTGCTCTTGAGGGAAAGAGGAGAATTACCATAATCTGTGTGTCAATTTCCAAATAATTCTGTCTGACTTGAGGATGGAT  
TTCAG-TTCCTGCCTATGACAGTGGGAGGCTTTGTTCTGGAAATTCACAACTATTGAAAGAAAAACCATACAGCCTA  
AAGGATCCACACTGACTGAGGGCTGGGAAGCTATGTAAATTCCTGTCTTTAGGGGAGAGTTTCACT---CAGCAGAA  
GAAGGTATCACACCACAGAGAAGGTGGAAGTGATTCTTTTACCAAAGCTTGTGAAATGAATATGTCAACTGAATTCTA  
AATGTAATCCACT-----

-----GT  
TCT---CAATCAGGTAGTGAAC TTATACATCTATGTGCCAG-----



TGTCTTT-----GGGGAGTAATGAGGAGAAGAACTTCCTAGTTCATGTCCTAGTTAGGCTCTTAGAAG-A  
AAAAC-AAAAAATGTTTTTGTGACCTGAAG---AATA---CTAGG---tgatatagcttgatatttgcctctccaa  
atctcattttgaaatttg-atccccagtggtggag-atgggggtctagcgggaggtggttggggtc-atggggggcggatc  
cctcatgaatgacttggtgccattcttat-gggat-----tcagtgagttcttgctgt--tagtttccgggagatctg  
gttgtcaaaaagagtctggcatcttattcagtgccctcccttctcccctgactatttctctccctttctcactctctct  
ttctc-----tgtctcacttccctgccatgtgatcttt--acacaccagctccccctcccccttctgccatgactg  
gaagcttccctgaagtccgtgacagaagcagaatagagtgctatacttcttgtagcagcctgcag-aactatggtccaaa  
taaacctctttttgttataaatta-cccagtcctcaggtattcc-tttatagcaa-tgcaa-atggactaagaca---C  
TGGG---CTTGGG-ATTAGTTTTGGGGATGTACCTAGAACCCTTCAG----TTAATGT---AGTCTACTCTTATTTCC  
TAGTTATC--ACTAC

>Rhesus

ATGG-AATGG-TTCTAAATATCACAAAATTTTCTCCTCGGTCCCTTCTTT-AGTCTTTTCTT-CATCTTAGCTCTG  
CATGCTTTAATTTAGTT-GGTTGGTTTTTCTTGACTTACATT--G--GGTG-----GGTT  
TGTCTTT-----GGGGAGTAATGAGGAGAAGAACTTCCTAGTTCATGTCCTAGTTAGGCTCTTAGAAG-A  
AAAAC-AAAAAATGTTTTTGTGACCTGAAG---AATA---CTAGG---tgatatagcttgatatttgcctctccaa  
atctcattttgaaatttg-atccccagtggtggag-atgggggtctagtgagggtggttggggtc-gtggggggcggatc  
cctcatgaatgacttggtgccattctttt-gggat-----tcagtgagttcttgctgt--tagtttccgggagatctg  
gttgtcaaaaagagtctgcaatcttattcagtgccctcccttctcccctgactatttctctccctttctcactctctct  
ttctc-----tgtctcacttccctgccatgtgatcttt--acacaccagctccccctcccccttctgccatgactg  
gaagcttccctgaagtccgtgacagaagcagaatagagtgctatacttcttgtagcagcctgcag-aactatggtccaaa  
taaacctctttttgttataaatta-cccagtcctcaggtattcc-tttatagcaa-tgcaa-atggactaagaca---C  
TGGG---CTTGGG-GTTAGTTTTGGGGATGTACCTAGAACCCTTCAG----TTAATGT---AGTCTACTCTTATTTCC  
TAGTTATC--AGTAC

>Marmoset

ATGG-AATGG-TTCTAAATATCACAAAATTTTCTCCTCGGTCCCTTCTT-----TTTCTT-CACCTAATCTCTG  
CATGCTCTAATTTAGCT-GCTTGGCTTTTTCTTGACTTACAGT--G--GGTG-----AGTT  
TGTCTTT-----GGGGAGTAATGA-GAGAAGAACTTCCTAGTTTTGTGTCCAGTTGGGCTCTTAGAAG-A  
AAAAT--AAAAACATTTTTTGTGACCTGAAG---AATA---CTAAG---tgacatagcttgatatttgcctccctccaa  
atctcatttttaaaatttg-atctccagtggtggag-atgggggtctgggtggaaggt-----gtc-atagggggcagatc  
cctcatgaatggcttggtg-----agtttctgggagatctg  
gttgtc-aaaagagtctggcatcttattcagtgccctcccttctctcctgctgttctctctccttctcactctctct  
ctctc-----ttacttccctgccatttgatcttt--acacaccagctcccccttcccccttctgccatgactg  
gaagcttccctgcagtcctgccagaaac-----gagtgctgtggttcttgtagcggcctgcag-aacctatggtccaaa  
taaacgtctttttgttataaatta-cccagccttaggtattcc-tttacagcaa-tacaa-atggactaaggca---C  
TGGG---TTTGGG-GTTAGTTTTGGGGATGTACCTAGAACTTTTTCAT----TTAATGC---AATA-ATTCTTATTTCC  
TAGTTATC--AGTAA

>Tarsier

ACTG-AATGA-TTCTAAGTATCACACAATTTTTCTCCT--GTCTCTTTCTT-AGACTTTTCTT-CCCCTCATTCTG  
CTTCTTTAATTCATTT-GGTTGGTTTTTCTTGACTTACATT--G--AATG-----GGGT  
TCTCTTT-----GAAGAGTAATGT-GAGAAGAAAT-----TCTTGGTTCAGATCTCAGAGG-A  
AAAAC-AAGTAA-GTTTTTGTGACCTGGAG---AATA---CTGGG---tgatatcggttgatatttgcctccctcc-a  
atctcatggtgaaatttg-atccttagtgtagaag-gtgggg-----agtc-atggga-----c  
cctcatgaatgactttatggttcttcttggtgggggt-----tgagtgagttcttactct--tagctcct--gatacctg  
gttgt-----ctggca-----cccccg-----ttctctttctgtctctctat  
ctctc-----tactcacttcttgccatgatcttc--aaatgccatttccccctt-ccccttccatcaggagtg  
gaagcttcttgaggctcctcaccagaagcagaagctgacactatgcttcttgtagcagcctacag-atctgtgagccaaa  
taaaacctt---ttataaatta-cccagccttaggtattcc-tttataacag-cacaa-atggactaagaca---C  
TGGG---TTTGGG-GTTAGTTCTTGGGATGTTTCTGAAGCCTTTTCAG----TTGATGC-AGAGTCTACTCATATTTCC  
AGGTTATT--AGTAC

>Bushbaby

ATGG-AATGA-TTCATAACTATAAAAATTTCTCTTCTAGGTCCCTAA----AGTCTTTTCTTCCCCCTTGTCTCTG  
CACATTTTAATTAGGTT-TG-----TTTCTTGACATATATC--T--GGTG-----GGGC  
TGTCTTT-----GAGGATTAATGT-GAAAAGAACT-----TCCTTGTTCAGATCTAAGAGG-A  
AAAAC--AAATATGTTTTTGTGATCTGGAG---AATA-----

-----  
-----  
-----  
-----C  
TGGG--TTTGGG-ATTAGTACTTGGGATGTCCCTGAAAACCTTTCAG---GTAATGC-TGAGTCTACTCTTATTTTC  
CATTATT--AGTAC

>Mouse\_lemur

ATTG-AATGG-CTCTTAATACAATAAACATTTCTCTCCTGGGTCCTTCTTT-AGTCTTTCCTT-CCCTTTGTGTCTG  
AACACTTTAATTTACTT-GGTTGGTTTTTCTTGACATACATC--C--GCTT-----GGGT  
TGTCTTT-----GAGAAGTAATGT-GAAAAGAACT-----TCCTGGTTCAGATCTAAGAGGAA  
AAAAC--AAATATGTTTTTGTGACCTGGAG--AATA-----

-----  
-----  
-----  
-----C  
TGGG--TTTGGG-ATTAGTACTTAGGATGTTCTGAAACTTTTCGG---TTAATGC-AAAGCCTACTGTTATTTCC  
CAGTTATT--AGTAC

>Mouse

A-AG-AGAGG-TCCCAGCTCCTACAAGCACCTCTCTCCTGTTTGTGTTGTTTGTGTTTAAACC-TTCATTGCCCTC  
AAATCT---GGCCTCT-----TTCAGT--A--GGT-----  
TGTTTGTTCGTGAATTAAGGTTAGTAATGC-AAAAGTAACT-----TCCAGGTTTAGAGCTCAGGGG-G  
AAATT---ATGACTTATTGTGCCCGTAG--AATA-----

-----  
-----  
-----  
-----C  
TAAG--TTTGGG-GCTAATTCCTTGTCTTTGCCCTTGAACCTTCTGGTGGGACAACGGCAGATTGT-CT-CTAGTTTC  
TACTCACT--ACTAT

>Dog

GTGG-AATGA-TTCTTAATACCATCAA-ATTTCTC-----TTT-ATTCT-----TTCCTG  
CACAGTTTAATTCATTT-GGTTGATTTTTCTGAAATACATC--TTGGGTGTGTGTGTGTGTGTGTGTGTGTGTGT  
TGCTTTT-----TAGGAGTAAAGT-GAGAAGAAACC-----TCCTGGCTTAGATCTCAGAAG-A  
AAAAA--A-----TCTGTGACCTGGAG--AACA-----

-----  
-----  
-----  
-----C  
TAGG--TTTGGG-GTTAGTTCTTGGGA-GTCCTTGGAACTTTTCAG---TAAATGGCAGACTCTACTCTTATTTTA  
TAGTTATC--AGTAC

>Horse

ATGG-ATTGT-TTCTTAATGCCATAAACACTTCTCTCTTGGGTCCCATGTTT-AGTCTTTTCTT-CCCTTTGTTTCTG  
CACACGTTAATTCAGTT-GGTCGGCTTTTCTCACAACACC--T--GGTG-----GGGT  
TGGCTTT-----TAGGAGTAAAGT-GAGAAGAACT-----TCATGGTTCAGACCTCAAAGG-A  
AAAAC--AAGTAAGTTTTCTGTGAGGCGGAG--AACG-----

-----  
-----  
-----  
-----C  
CAGC--TTTGGT-GTTAGTTCTCGGGATGTCCCTGGAAC-TTTCAG---TCAATGGCAGAGTCTGCTCTTATTTTCG  
TAGTCATC--GGTAA





AGCTTGTCTCAAGCA-CTGAATGTGAAGATGGATGCTTGGGTAGAGCTTAAAGTAGTTGAAAGGAGATGAACTGAGC  
TCCTCCTTAAAAGCACCACATGTAT-TTGTTAATAGTTATCATAGGCCATGCCTGTAG--CAGCCCAGGAAAA---GT  
CCT---tgatagagtttggatatttgttggcc-tccaaatctcatatcaaaatttgattcccaatggttatagataggac  
ctgatgggaagtgtttgggtcacagggacagattcttcatgaatgtcttgggtgcatcctcggactag---tgagtg  
agttattactc--ttaattaccatgacaactggctgttaaaaagagcctggcaccttgctccctctctctctctctc  
ctctcttgccgtgtgatgc-----ttgctttcctttacccttctgcatgagtagaagcctccctgaagccctcat  
ctaaa-----gcagaactataagccaaacaaatcccttttctttata  
aat-accagcctcatgtattcctttataacaatgcaaaatgcactaagaca---GTCCC---CAAGT--GGACATGC  
GTGGGA--TTCCTCGACTCTCTAATGCAGGTGCAGTTAAGGGGCATTTACCTCAGTCCTGGTACAACAAAAATTCCAA  
GGCCTAGAATCTATATTAGTCTGAGCAGCAAAATTGTTGCTTTGTATGGTAGGTTAATTTGCTTCTGGG--TAAAAA  
GATGGCCATGGGTATAAAAAGGTGGAGTCCATGCTTCTCTGGCCCCGTGGGCATCTCACTTTATCCACACAGCCAAAGA  
CCACCAACCACAGCTATATTTCCATGATAAGTGTGGGTAGA

>Marmoset

GAGAAATACTTGGCACAGGCCTAAAATGAGTTACT-ATT-----TAGCTCCAGCTACCTGAAGATGGTCAAAT  
CCTCTACAGCACTGGTTGGAGTTAAGAGGAATTTGAGGGAGTGACCAAGATATGTCCTACATCCAGTTGGAGGCCAGT  
CTAGTTCTGTA-CAGTGGTGAGCTACAAGCTTACTTAGAGATGTGCCAAGACATAACT--GAAGACAT-CAGAATTTG  
ATGCTATTGAGAAAA---TGTCCTTTTTAAGATGGGATCTCAAGAGGAGTTGCCTCAGTTGGCAGCAACTGCAAGTCG  
AGCTTGTCTCAAGCA-CTGAATGTGAAGATGGATGCTTGGGTGGGGCTTAA-GGAGTTGAAAGGAATTGAACTGAGC  
TCCTCCTTAAAAATACCACATGTAT-TTGTTAAAAGTTATGTTAGGCCATCCCTATAG--CAGCCCAGGAAAA---GT  
TCT---tgatagagtttggatatttgtccccatccaagtctcttgtcaaaatttgattcccaatggttggagacaggac  
ttgatgggaagtgttaggggtcacggagacagatttctcatgaatgtcttgggtgccttctcgggaataa---tgagtt  
agttcttactc--ttagttccatgacaactggctgttaaaaagagcctggcaccttcc-acctctctctctctctctc  
ctctcttgccgtgtgatgc-----ttgctttcctttacccttcttccatgagcagaagcctccctgaagccctcat  
ctaaa-----gaagaactgtgaaccaaaacaaacctcttttctttata  
aattaccagcctcatgtattcctttatagcaatgcaaaatgcactaagaca---GTCCT---CAAT---GGACATGC  
ATGGGA--TTCCTGGACTCTTGAATGCAGATGCAGTTAAGGGGCATTTACCCAGTCTTGGTACAACAAAAATTCCAA  
GGCCTAGAATCTATATTAGTCTGAGTAGCAGAATTGTTACTTTGTATGACAGGTTAAGTGGATTCTGGG--TAAAAA  
TATGGCTGTGGGTATAAAAAGGTGGAGTCCATGCTTCTCTGACCTGGTGGGCATCTCACTTCATCCATACAGCCAAAGC  
CCACCAACCACAGCTGTATTTTTCATGTTAAGCATGGGCAGA

>Tarsier

GAGAAATATTTGGCACAGGCCTGAAGTGCCTACTAGTC-----TAGTTGAAGCTGCCTGAAGATGGTCAAAA  
CCTCCATGGGACTGGTTG-AGCCTGGAGGAATTTGAAGGAATGGCCAACATGTCTCCCATGACCAATGGCAGGCCAGT  
CTACGT-GGCA-TGGCAGTGTGCTACAAGCTTATCTAAAGAAGTGTGAGATGTGAAT--GAAGACATTCAGAAGCTG  
ATTCTGTAGAGGAAA-CATGTCCTTCTTGAGATGAGCTCTCTGAAGGAATTGCCTCCATTGGCAGCAGCTGTAGATCA  
GACATGTTCTGCAACA-TCAACTATGAAGATGGATGCTTGGGTAGAATGGCT-ATTGTTGAGAAGAGCCAACTTGAGT  
TCATCCTTGTGAATATTACATGTTTGTGTAATGGCTGTGATGGGCCATGCCTGTGT--TGGCCCAGGAAAA---GT  
CCC---agaaatagtttggatatttgttccc-tcctggctcatggtgaaatttgatccccactggttggagtggggc  
ctgggtgggtgggtatttgggtcatggggg-cagcgcctcatgaatgacttgggtgggtacctccttgggtgtaa-----  
---ttttgctc--ttagttcccgtgaaatctggctgtaa-aagaacctggcatttcttcccctctcc-----tc  
ctttctcagcaggtgacacact-----gtcctccactttgccttccaccttgagtgaaatctccctgaagctctcac  
cagagacagatgcaggcaccatgctgattcctatacagcctgcagaggcatgagccacatgaacctcttttctttata  
aattttccagtccttatatggttctttatagcaatataaaatggactaagatg---GTTCC---CAT--GCAGACACAC  
GTGGAA--TTTCTGGACTTT--AACCAAGGTGTAGTTGAGGAGCATTACCCAGTCTGGCACAGCAAGGATTTCAA  
GGCTTGAATCTACATTAA-CCTCAGTAGCAGGATGATTGCTTTGT-----GTAGCTTCAGGG--TAAAAA  
CATGA-TGTGGGTGTGTAAG-----TCTAGCTTCTCTGGCCTAGTGG-CATCTCACTTCATCTACACAGCCA-AGA  
TCTCCAACCTTCAGGGATAATTCATGATCAACATGGGCAGA

>Bushbaby

AAGAAATACTTGGCATAGACCTGATGTGAGGTTACT-CTG-----TAGTTACAACCTGCCTGAGGATGGTCAAAA-  
-----GAAGCACTGGTTGGAGCCAAGAAGAATTTGAAGGGATGACAGAGATGTCTCCTCTGCCAGTGGATGGCTGGT  
TTACTTCTGTGGTAGTGGCAAGCTACAAATTCCTTAGAGAAGG-CCAAGACATCAAT--GAAGACATTTAGAAGCTA  
ATGCTATTGCAGAAA---CATCCTTCTTAATATGAAATCTCTGGAGGAGTTGCCATAGTTGGCAGGAACCTGGAAATCA  
GACATGTTCTCAACCCACTAAGGATGAAGATAGACACCTGGATGGAGCTTAA-GAAGTTGAGAGAAAACCAATTTGAGC  
TCCTCCTCGAGACCACTGCATATCTACTGTTAAAGGTTGTGGCAGGCCATGCCTGT---CAGCCCAGGAGCA-----  
-----  
-----  
-----  
-----

-----GTCCC---CAAG---GGATATAC  
ATGAGA--CTCCAAGACTTTCCAATGCAGGTGTGGTTATGGGGCAATTTAGCCAGTCCTGCTACAATAAGAATTTTGG  
AGTCTAGAATCTGTATTAGTCCTGAGTAGCAGAACTGTTGCTTTGCATGATG-CTTAAGTGATTTCTGGGTAAAAAAA  
TATGCCTGTAGGTATAAATGGCTGAGACTATACTTCTCTGGCTGGGTGGGCCTCTTGCTTCATCCACACAGCCA-AAA  
CCACCAACCTCCACTATTTTTGCATGATAAATATGTGCAGA

>Mouse\_lemur

GAGAAACACTTGGCACAGGACTGATGTGAGGTA-CT-GAG-----CAGTTATAACTGCCTGAAGATGGTCAAA-  
-----GGAACACTGGTTGAAGCCAAGAA---TTTGAAGGAATGACCAAGATGTCCCCTGTGCCCAATGGAAGGGCAGT  
CTACTTTTTGCA-TAGTGGTGAGCTAAAGGTT-ACCTAAAGAAGT-GTAAGACATGAAACAAAAGACATTTAGAAGCTA  
ATGCTATTGAGGAAA--TATCCTTCTTAATATGAGATCTCTGGAGGAGTTGCTACAGTTGGTGGCAACTGGAAGTCA  
GACA-----CTAAGTATGAAGATGGAGGGTTGGGTGGGGCTTAA-GAAGTTGAGAGGAACCAAACCTGAGC  
TCCTCCTTGAGACCACTGCATGTCTGCTCTGAATGGTTATGGCAGGCCATGCCTGTGTACAACCCAGGGACA-----  
-----  
-----  
-----  
-----

-----GTCCC---CAAGGGACAACATAC  
ATGGGA--TTCCTAGACTCTCCAATGCCGATGCAGTTAAGAGCCATTTAGTCCAGTTCTGTCAACAATAAAAAATTTGA  
GGCCTAGGATCTATAGTAGTCTAAGTAGCAGAATTATTGCTTTGTATGATGGCATAAGTGATTTCTAGG--AGAAAA  
TATGGCTGTAGGTATAAAGGCTGAGGCTATACTTCTCTGGCCTGG-GAGCACTTTGCTTCATCCATACAGCCC-AGA  
CCATCAACCTCCAGTATTTTTCCATGATAAACACGGGCAGA

>Dog

GGGAAGTATTTGGCACAAAGCCTGAAGTACAGTGCT-GCCTAGTACTGTCCAGTTGTGACTCTCTG-AAAGAATCAAAG  
CTCCACAACA-TGGTTGAAGACAAGAAGATTTTGAAGG--GGGCCAAGATGTCTACCATAACCAATG-AAGGCCAAT  
CTAATTTTATA-GGAAGGTGAGCTACAAGTTTATCCAGCCATGTGCCAAGACATCAAT--GAAGATAATCAAACGCTA  
ATGCTATTGAGGAAG-CATGTCCTTCTAAAACGAGATTGCTGGAGGAGTTGCCACAGTTGCCAGCAACTGGAAGTCA  
GACA--TTC--AAGCA-CAGAAT-----ACGCTTGGGTAGAGCTTAA-TTCAT-GAGAGGAGCCAAACCAAAC  
TCCTCTTTGAAACTACTATATGTCTATAGCAAATAGTTATGACAGGCCATG--GGGG--CTGTCCATAGAAA-----  
-----  
-----  
-----  
-----

-----GTCCA---CAAGT--AGACATAC  
ATGGGAAATTCATGGCTTCTCCAACACAGCTGCAATTAAGAGGTGATTACTCCAATTTGG-TGCAATAAGAATTTTCAT  
GGCTTAGAGTCTCTATTAGTTCTGAGTAGCAGAAGTATTGCTTTGTATGGAAA-----  
CAT-----GACAGAATTGATACTTCTATGCCCTGGTGAGCATCTCATTCCACCCACACAGCCA-AGA  
CCACCAACCTCAGGTCTGTTTTCCATGGTAAACTTGGGTGGG

>Horse

AGGAAGTACTTGGCACAGGCCTGAAGGGCAGTGTT-GTCCAGTGCTGTCCAGTTGCAACTCCCTGTAGATGGTCAAAG  
CTTC-----TGGTTAGAGCCAAGAGGATTTTGAAGGGGTGACCAAGATGTCTCTCATGCCAGTGGAAGGCCAGT  
CTACTTCTGCA-TGGAGATAAGCTACAAGTTTACCCAGAGAGGCACCAAGACATTAAT--GAAGACACTCAGACGCTA  
ATGCT-TTGAG-----CAGAGACGAGATCTCTGGAGGAGTTGCCACAGTTGGCGGCAAGTGGAAAGTCA  
GACT--CTCTCAAGCA-CAGAAT-----CTGCTTGATG-GAGCTTAA-TTAGTTGAGAAGAACCAAACCTCGAAT  
TCCTCCTGGAGACCACTACGTGTCTATTGTGAATAGTTACGACAGGCTGTGCCTGGGG--TCACCCATGCAAA-----  
-----  
-----  
-----  
-----

-----GTCTC---CAAGT--CGACACAG  
ATGGGAAACTCCTGGCTTCTCCAGCACAG-----CACAAACAAGAACTTCAA  
GACCCAGAATCTCTATTAGTCTGAGCAGCAGAATTATTGCTTCATATGATGACTCAAGTGGTTTCTAGG--TGAAA  
CGT-----GGCAGAGTCCATGCTTCTCTGCCCTTGGGGCATCTCACTCCACCCATACAACCTA-AGA  
CCACCAACCTCAGGTATGTTTTCCATGAGAAACAAGGATGGA





**Marker M25**

>MSTB1

-----  
-----  
-----tgtcttagtccattttgtggttgctataa  
aggaatacctgaggctgggtaatttataaagaaaagaggtttatttggctcacggttctgcaggctgtacaagaagca  
tggcgccagcatctgcttctggtgagggcctcaggctgcttccactcatggcgggaaggtgaaggggagccggcgtgtg  
cagagatcacatggcgagagaggaagcaagagagagaggagga-----ggtgccaggctc-----  
-----ttttaacaaccagctctcgcgggaactaatagagtgagaactcactcatccccaccccgagggga  
gggcattaatctattcatgagggatccg-ccccatgacccaaacacctcccattaggccccacctccaacactgggg  
atcaaatttcaacatgaggtttggag-gggacaaacatccaaa-----ctatagca-----  
-----  
-----  
-----

>Human

TAGATGTACCAACATTAAGAAACATGATAG----GAGAGAGATTTGAGGATTCTCAACGGGTCAGGTGCTGAG----G  
GA-CCACAC----TAAGTACATTTAGGGTCATTGCCACCCAATAGTTGATTGATTGTTGTGAAGCCCAATA---TTTG  
ACAGGAATAGCCCAACAAGCTGTGTTTGGGAAACA---ATAA--G---tgtcttagtccatt-tgttttgctataa  
agaaacacttgagactgggtaatttataaagaaaagaggtttatttggctcacagttctgcaggctgtacaagaagca  
tagtgccaacatctgcttctcgtgagggcttccaggctgcttctacgcatggcacaaggggaaggggagccagtggtgt  
gcagatatca-atgaaaagaga-gggagcaagagagagaggaggaga-ggggggaggcagggtt-----  
-----tttttttaacaactagttcttgtgggaactaagagtgaga-acttac----tccc-----atgagaa  
tgacaccaagccattcacaagggatctg-ccccgtgatccaaatacctc-tgccaggc-----  
-----aagaggggcaacaaaccataatctgcaccatagca--A-AAAG-----GTTTCC  
CCTTTTAGCTGGGAATATCTAATTGCTGTGGCACTGATTGCTGAACATAAATAGCTGTTACTATCGATAAC-TGCAGA  
GGGCTTTTATATT-----TAATTGGTCAGC-----AGTCAGAGGTAGCTTGATATGGAGAGAGATCTTGTAACTA  
A-C-TCTCAACCATAATTTAGATACTGGGAAGGA-TTTTCTCTTCTGACCCAGCAA-----AATACT-TTGCTG  
CCTGCTCAGTGGTTTTGGAAAATTATTATTAGAGTAGACAGCTTGATAA-TGGACTCATCCAATGAAATTCTATGGATT  
GAAAATAATCTAGATTTTATATTTAACAGCATAAGAGTAGTTCCAAGATATATT---AACTAAGACA

>Chimp

TAGATGTACCAACATTAAGAAACATGATAG----GAGAGAGATTTAAGGATTCTCAACGGGTCAGGTGCTGAG----G  
GA-CCACAT----TAAGTACATTTAGGGTCATTCCCACCCAATAGTTGATTGATTGTTGTGAAGCCCAATA---TTTG  
ACAGGAATAGCCAGACAAGCTGTGTTTAAAGAAACA---ATAA--G---tgtcttagtccatt-tgttttgctataa  
agaaacacttgagactgggtaatttataaagaaaagaggtttatttggctcacagttctgcaggctgtacaagaagca  
tagtgccaacatctgcttctgatgagggcttccaggctgctgctacgcatggcacaaggggaaggggagccagtggtgt  
gcagatatca-atgaaaagaga-gggagcaagagacagag--aggaga-ggggggtgccagggtt-----  
-----ctttt---aacaactagttcttgtgggaactaagagtgaga-acttac----tccc-----atgagaa  
tgacaccaagccattcacaagggatctg-ccccgtgatccaaatacctc-tgccaggc-----  
-----aagaggggcaacaaaccataatctgcaccatagca--A-AAAG-----GTTTCC  
CCTTTTAGCTGGGAATGTCTAATTGCTGTGGCACTGATTGCTGAACATAAATAGCTGTTACTATTGATAAC-TGCAGA  
GGGCTTTTATATT-----TAATTGGTCAGC-----AGTCAGAGGTAGCTTGATATGGAGAGAGATTTGTAACTA  
A-C-TCTCAACCATAATTTAGGTAAGGTAAGGA-TTTTCTCTTCTGACCCAGCAA-----AATACT-TTGCTG  
CCTGCTCAGTGGTTTTGGAAAATTATTATTAGAGTAGACAGCTTGATAA-TGGACTCATCCAATGAAATTCTATGGATT  
GAAAATAATCTAGATTTTATATTTAACAGCATAAGAGTAGTTCCAAGATATATT---AACTAAGACA

>Orangutan

TAGATGTACCAACATTAAGAAACATGATAG----GAGAGAGATTTGAGGAGTCTCAACAGGTCAGGTGCTGAG----G  
GA-CCACAC----TAAGTACATTTAGGGTCATTCCCACCCAATAGCTGATTGATTGTTGTGAAGCCCAATA---TTTG  
ACAGGAATAGCCCAACAAGCTGTGTTTGGGAAACA---ATAA--G---tgtcttagtccatt-tgttttgctataa  
agaaacacttgagactgggtaatttataaagaaaagaggtttatttggctcacagttctgcaggctgtacaagaagca  
tagtgccaacatctgcttctggtgagggcttccaggctgcttctaccatggcacaaggggaaggggagccagtggtgt  
gcagagatca-atgaaaagagaggggaacaagagag-----aggaga-ggggggtgccagggtt-----  
-----ttttt---aacaactggttcttgtgggaactaagagtgaga-acttac----tccc-----atgagaa  
tgacaccaagccattcacaagggatctg-ccccatgatccaaatacctc-tgccaggc-----  
-----aagaggggcaacaaaccataatctgcagcatagca--A-AAAG-----GTTTCC

CCTTTTAGCTGGGAATATCTAATTGCTGTGGCACTGATTGCTGAACAGAAATAGCTGTTACTATCGATAAC-TGCAGA  
AGGCTTTTATATT-----TAATTGGTCAAC-----AGTCAGAGGTAGCTTGATATGGAGAGAGATCTTGTAAC  
A-C-TCTCAACCATAATTTTAGGTACTGGGAAGGA-TTTTCTCTTCTGACCCAGCAA-----AATACT-TTGCTG  
CCTGCTCAGTGGTTTGGAAAATTATTATTAGAGCAGACAGCTTGATAA-TGGACTCATCCAGTGAAATTCTATAGATT  
GAAAATAATCTAGATTTTATATTTAACAGCATAAGAATAGTTCCAAGATATATT---AACTAAGACA

>Baboon

TAGATGTACCAACATTAAGAAACATGATAG----GAGAGAGATTTGAGGATTCTCAAGGGGTGAGGTGCTGAG----G  
GA-CCACACTGTATAAGTGCATTTAGGGTCATTCCCACCCAATAGCTGATTGATTGTTGTGAAGCCCAATA---TTTG  
ACAGGAATAGCCTAAACAAACTGTGTTTAAAGGAAACA---TTAA--G---tggcttagtccatt-tgttttgctataa  
agaaacacttgagactgggtaatttataaaggaaaagaggtttatctggctcacagttctgcaggctgtaaaataagca  
tgggtccaacat---cttctgggtgagggcttcagggtgcttctagccatggcacaagggaggaggagccagtgctgct  
gcagagatca-atgagaagaaa-gggagcgagagagagag--aggagagggggggtgcccagttttttttttttggtt  
tggtttttggttttttttaacaactagttcttctgtgggaactaagattgaga-acttac-----tccc-----atgagaa  
tgacaccaagccattcacaagggatctg-ccaccatgatccaaatacctcttggcaggccccaccttcaaca-ctggg  
gtcaaatttcaacatgaaatttgatgagggcaacaaccatctgaccatagca---A-AAAG-----GTTTCC  
CCTTTTAGCTGGGAATAGCTAATTGCTGTGGCACTGATTGCTGAACAGATACAGCTGTTACTAT--CTAAC-TGCAGA  
AGGCTTTTATATT-----TAAGTGATCAGC-----AGTCAGAGGTAGCTTGATATGGAGAGAGATCTTGTAAC  
A-C-TCTCAACCATAATTTTAGGTACTGGGAAGGA-CTTTCTCTTCTGACCCAGCAA-----AATACT-TTACCTG  
CCTGCTCAGTGGTTTGGAAAATTATCTTTAGAGCAGACAGCTTTATAA-TGGACTCATCCAATGAAATTCTGTAGATT  
GAAAATAATCTAGA-TTACATTTAACAGCATAAGAAAAGTTCCAAGATATGTT---AACTATGACA

>Rhesus

TAGATGTACCAACATTAAGAAACATGATAG----GAGAGAGATTTGAGGATTCTCAAGGGGTGAGGTGCTGAG----G  
GA-CCACACTGTATAGGTACATTTAGGGTCATTCCCACCCAATAGCTGATTGATTGTTGTGAAGCCCAATA---TTTG  
ACAGGAATAGCCTAAACAAACTGTGTTTAAAGGAAACA---TTAA--G---tggcttagtccatt-tgttttgctataa  
agaaacacttgagactgggtaatttataaaggaaaagaggtttatctggctcacagttctgcaggctgtaaaataagca  
tgggtccaacat---cttctgggtgagggcttcagggtgcttctagccatggcacaagggaggggagccagtgctgct  
gcagagatca-atgagaagaaa-gggagcgagagagagag--aggaga-ggggggtgcccagtttt-ttggttttggtt  
tggtttttg-ttttttttaacaactagttcttctgtgggaactaagattgaga-acttac-----tccc-----atgagaa  
tgacaccaagccattcacaagggatctg-ccccatgatccaaatacctcttggcaggccccaccttcaaca-ctggg  
gtcaaatttcaacatgaaatttgatgagggcaacaaccatctgaccatagca---A-AAAG-----GTTTCC  
CCTTTTAGCTGGGAATAGCTAATTGCTGTGGCACTGATTGCTGAACAGATACAGCTGTTACTATCGATAAC-TGCAGA  
AGGCTTTTTTATT-----TAATTGGTCAGC-----AGTCAGAGGTAGCTTGATATGGAGAGAGATCTTGTAAC  
A-C-TCTCAACCATAATTTTAGGTACTGGGAAGGT-CTTTCTCTTCTGACCCAGCAA-----AATACT-TTGCTG  
CCTGCTCAGTGGTTTGGAAAATTATTTTTAGAGCAGACAGCTTTATAA-TGGACTCATCCAATGAAATTCTGTAGATT  
GAAAATAATCTAGA-TTACATTTAACAGCATAAGAAAAGTTCCAAGGTACGTT---AACTATGACA

>Marmoset

TAGATGTACCAAAATTAAGAAACATGAT-----AGAGATCTGAGGATTCTCAAGGGGTGAGGTACTGAG----G  
CA-CCACACTATATAAGTACATTTAGGATCATTACCACCCAATAGCTGATTGAGGGTTACGAAGCCAGCA---TTTG  
ACAGGAATAGCCCCAACAAAGCTGTGTTTAAAGGAAACA---ATAA--A---tgtcttagtccatt-tgttttactgtaa  
agaaatagtgcgagactgggtaatttataaagaaaagaggtttatctggctcacagttctgcaggctgtacaggaagca  
tagtatcagcatctgcttctgggtgaaggcttcaggctgcttttaccatggcac-agggggaaggggagccagttttt  
acagagatca-atgaggagaga-ggaagcaagagagagaa--aggaga-cggaggtgcccaggttc-----  
-----athtt---aacaactcattcctgtgggagctaagagtgaga-acttac-----tccc-----atgagaa  
tgggtgccaagtccagcgaagggattgg-ctcccagatccaaatacctcttggcagccccaccttcaaca-ctggt  
gtcaaatttcaacatgaaatttggtgacggttaacaaccatctacactacagca---C-AAAG-----GTTTCC  
CCTTTTAGCTTGGAAATATCTAATTGGTATGGCACTGATTGCTGAACAGAAATAGCTGTTACTATCAATATA-AAGAGA  
AGGCTTTTATATT-----TAA-TGGTCAGC-----AGTCAGAGGTAGCTTGATGTGGAATGAGATCTTGTAAC  
A-T-TCTCAACTATAATTTAGGTACTGGGAA----TTTCTCTTCTGACCCAGCAA-----AATACT-TTGCTG  
TCTGCTCAGTGGTTTGGAAAATTATTTTTAAAGCAGACAGCTTGATAA-TAGACTCATCTAATGAAATTCTATAGATT  
GAAAATAATCTAGT-TTATATTTAACACATGAGAATAGTTCTAAGATATATT---AATTGAGACA

>Tarsier

TAGACACACCAACATTTAAAACTTGATAGAGAAAAGAGAGATCTGA-----GTCATGTGCTGAG----A  
AA-TCACTCTATATACATGCATTTAGGGTCATTTCCACCCAACAGCTGACTCAGTGTGATAAAGCCAGAA---TTTG  
AC-----AACTGTCTTTAAAGAAACA---ATAAATG---tgtcttagtccatt-tgtgttgctataa  
aggaatatctaagactgtgttatttataaagaaaatagtttatttggctcacagttctgcaggctgtacaagatgca  
tgggtgtaacatctgcttctggtaatagcctcagaaagcttcactgatgggtgaaaggggaaaggggaacca---ttat  
gtggagatcacatgggtgagaga-ggaagcaagagagt-----ggaaga-----ggtgccaagttc-----

-----ttttt---aacaaccagttctcatgggaaataagattgaga-actcactcattcct-----gagagaa  
tgacatcaagccattcatgagggatcta-ccccacaatccaaacaccttccactaagccatacctttaatatctggg  
atcaaatttcaacctgagactt-gttgggaccaagaaccacatgtaaaccacagaa---AAAAAG-----ATTTCA  
CTAGTTAGAATGGGCTCTTAAATTG-TATAAACTTATTG-TGGTCAGAAATAGCTATTTCATAATGATGAC-TACACA  
A-GCTTTGTATT-----AAA-TGGT-AGC-----CACTAGAGAC-GCTTAA--GTGAGTCATATCTGGTAACTA  
-----  
-----

>Bushbaby

TAGATGAGCCAACAATTCAAACCTTGATAG----AAGAGACAACCTGAGGATTCCCAAATCGTCCAGTGCTGGG----G  
G--TTACATGATGTAA-----GTCATTCCCATCCAACAGCTGATGCAGGGCTCTAAAGCTCAGGA---TGTG  
ATGTGAATAGCCCAAACAAGCTGTGCCTAAGGAAACA-----  
-----  
-----  
-----

-----A---CA-----ATTTCA  
GCATTTATCTGGGAATATCAAATTGCTATGACACTGATTGTTGATGAGATATAGCTTTTTCATGACAATGAC-TGCAGG  
AGACTTTGTAAT-----TAATTGTTTCAGC-----AT-CAGAAGTAGCTTTCTGTGGAGTCAAATCTGGTAACTG  
----TCTCTACTGTAATTTTGGGTATTGGGAAGGA-CTTCCTTTTCTTACTCAGCAAAATATTAATACC-TGGCCTG  
CCTGCTCAGTGGTTTAGAAAATTATTTTTAGAGCAGACAGCTTTATGG-TAGACCTATGCTGTGATGTTCTATACATT  
GAAAATAGTCTAGATTTATATTTAATGGCAT--AAATATATTCAAGATATATTATCAACTG--AAA  
-----

>Mouse\_lemur

TAGAGACACTGATACTGAAAACTTGATAG----AG-----ATTTGGAGATTCCAAAGTAGGCACGTGCTTGA----G  
GGCTCACACTCTCTGA-----GTCATTCCCATCCGACACCTGATTGAGTGTGAGGAAGCTCAGGA---TCTG  
ACAGGAGTAGCCCAAACCTAGCTGTGCCT-AGGAAACA-----  
-----  
-----  
-----

-----A-AACC-----TTTTAA  
CCATTTATCTGGAAATATCAAATTGCTATGACACTGATTATTGAGCAGAAATAGTTATTTCATGAAAATGGC-TGCAGA  
AGGCGCTG-----TAATTGGTTCAGC-----AG-TAGAAGTAGCTTTATGTGGAGTCCAGATGGAGTAACTC  
----ATTCTACCATAATTGCATGTATTGGGAAGGACCTTCCTCTTTCTTACCCAGCAA-----AATCCT-TTGCCTG  
CCTACTCAGTGGTTTAGAAAATTGTTTTTAGAACTGACAGCTTTATGGATAGACCCATCCAGTCAAATTTCTATAGGCT  
GCAAATAATCTAGGTTTATATTTAATGGCATG-AAATATATCCAAGACATATTGTTAACTGAAAAA  
-----

>Guinea\_pig

TAGATATGCAAACATTTTAAACCTTGACAGC---AGAGAGATCTGAAAATTCTTATGGAGCCAAGTGATAAG---G  
GA-TTGGATTATACAAGTGCATTTAGGGTCATTTCCACCCGACAGCTAATTGAGTGTATGAAGCATAAGA---TGTG  
GCAGGAATAGCTCAAATAAGCTGTGCCTAAGGAAACA-----  
-----  
-----  
-----

-----A-GGAA----TAATTTTG  
CTGTTTA-CTGAGAATAGCAAATTTCTATGAGACTGATTGTTGATCAGAAATAGCTGTTTCTAATGATGAC-TGCAAA  
AGTCTTTGCAAT-----TACTTGGGGAGT-----AGTCAAAGGTAGGTTTACACAAAGTCAAAGTGGTAAATA  
A-C-TTTGTAACATGCTTATAGGTGTT-GGATGAG-CTTTTTCTTTCTAATCTAGCAC-----AATATTTTTGCCTG  
CATGGTCACTGGTTTGGAAAATTATTTTTGAGCAGACATCTTTAGGA-GAAACCCATCCAGTGAAGTTGTGTAGATT  
AAAAATAATCTAGATTTGTATTTTCATGATATTTAAATT--TATGACAT-----TAACTGAA-AA  
-----

>Mouse

-----TTTTAAAAATTTGAAAGCTATGAGAGCGACTTGAGGATGCCCAAGGAGTCAAGAGCAGAG----G  
GA-TCATATTTTCAAGAGTGTAGTTAAGGCCGTTTTTTCAGCCAACCTGCTAATTGAGGTTCTGAG---TGAAGCTTCCC  
ACAGGAATAGCAGCAACAGGCTA-GACTGAGGCAATA-----  
-----





AAATTAGGC-ACCTGTACCTTGAAGAAGGCTGACAATAATCTTGGACATTTCTTGAATCTCACTGGCTGATGGCACCC  
GTTTT---ACCTA---tgctatgatttggatggttggccatcc-aaatctcatgttcaaatttgat--ccccagta-  
tggaggtgcagcctaaggggaggtggttgggtcacattgctggggagcagatccctcatgaatagattaa-ttccct-a  
gggttggggcggtgagtgagttcttgttccattagttcccatgacagctggt-gttaaaaagagcctggcattatc  
ctcg-ctcttgcctcctctctc----accatgtggt--cgcgaaatgctggctccctttctc-cttccac---tgtga  
-----gtggcctgaggttttctccaaatgcagataccagcaccatgcttct-----tgtacagcct  
gcag-accatgagccaaataaaacttcttttctatataaattaccagcctcagctattccttt-----aagcaacac  
aaacaaagaca---ACCCA---TCCCTGACTTAATTCCAACAAGATTATTTCAATGTTC--AAATTT-TTAAAACCTC  
CTGAAGAC-TATGAAT---ACCAGAGTACCTATAAATATACATATTTCTCACCCAAAAGGACAGGGCTCTTATTT-CC  
>Orangutan  
CATCCCCTAC--TCTGGCTA--ATGAGTGACCATTCTGCTTTAG-CATTGATAAATTGAGCCTCATAACAT---TCC  
TCCTGCCTACCAGATAA---CATTTAG--GAGACTTAATCATAGAATCCCTTCC-----ATTTTCTGACAGCATC  
CAATCCAGAGCAAAGCCCTGCTGCCTTGAACCCTC-TCTAAAACCA----CCTAACGTACACCTGAGTCTATAAATC  
TTTTT--TCAACACCCTTTTACTGAGATGCCCTGCAGTTCTCAATGGTGTGAGGTCTT-CCCCTGCAACAAGTCAAT  
AAGTCCAA-TTTCATCTGA-----ATTCAGGAG-TATGTTCTTGGTGGTCTTTGCTATAGGATACTGACATCATCCA  
TCTGGAAGTCATCAATGATATCATCCATC--CAGAAGTATGT--TAAATCATTGGCAGCCTAAATC-----TGTCAT  
AAATTAGGC-ACCTGTACCTTGGAGAAGGTTGATGATAATCTTGGACATTTCTGAATCTCACTGGCTGATGGTAACC  
ATTTT---ACCCA---tgctatgatttggatggttggccatcc-aaatctcatgttcaaatttcat--ccccagtg-  
tggaggtgcagcctaaggggaggtggttgggtcacattgctggggagcagatccctcatgaataga-taa-ttccct-g  
gggttggggcggtgagtgacttcttgttccattagttcccatgacagctggt-gtttagagagagcctggcatttctc  
cttg-ctcttgcctcctctctc----accatgtggt--ctgcaaatgcccggctccctttcccttttccac---tgtga  
tttagcctgtgatttagcctgaggttttctccaaatgcagataccagcaccatgcttcttgtacagcctgtacagcct  
gcag-accatgagccaaataaaacttcttttctatataaattaccagcctcaggtattccttt-----aagcaacac  
aaacaaagaca---ACCCA---TCCCTGACTTAATTCCAACAAGATTATTTGATGTTCCTCAAAAATTT-TGAAAACCTC  
CTGAAGAC-TATGAAT---ACCAGAGTACCTATAAATATACATATTTCTCACCCAAAAGGACAGGACTCTTATTT-CC  
>Rhesus  
CGTCCCCCTAC--TCTGGCTA--ATCAGTGACCACGTCTGCTTTAC-CACTGATAAATTGAGCCTCATAACATCCCTCC  
TCCTACCTACCAGGTAA---CATTTAG--GAGACTTAATCCTAGAATCCCTTCC-----ATTTTCTGACAACATC  
CAATCCAGAGCAAAGCCCTGCTTCCCTTGAACCCTC-TCCAAAATCA----CCT----TACACCTGAGTCTATAAATC  
TTTTT--T-AACACCCTTTTACTGAGATGCCCTGCAGTCCCAATGGTGTGTGGTCTT-CCCCTGCACCAAGTCAAT  
AAATCCAA-TTTCATCTGA-----ATTCAGGAG-TATGTTCTTGGTGGTCTTTGCTATAGGACATTGACATCATCCA  
TCTGGAAGTCATCAATGATATCATCCATC--CAGAAGTATGT--TATATCAACT-GCAGGCTAAATC-----TGTCAT  
AAATTAGGC-ACCTGTACCTTGGAGAAGGCTGACAATAATCTTGGACATTTCTTGAATCTCACTGGCTGATGGCACCC  
ATTTT---ACCTA---tgctatgatttggatggttggccatcc-aaatctcatgttcaaatttgat--ccccagta-  
tggaggtgcagcctaaggggaggtggttgggtcacactgctggggagcagatccctcatgaatagattaa-ttccct-a  
gggtcggggcggtgagtgagttcttgttccgtagttcccatgacagctggt-gttaaaaagagcctggcattatc  
ctcg-ctcttgcctcctctctc----accatgtggt--ctgcaaatgcccggctccctttctc-cttccac---tgtga  
-----gtggcctgaggttttctccaaatgcagataccagcaccatgcttct-----tgtacagcct  
gcag-accatgagccaaataaaacttcttttctatataaattaccagcctcagctattccttt-----aagcaacac  
aaacaaagaca---ACCCA---TCCCTGACTTAATTCCAACAAGATTATTTCAATGTTC--AAATTT-TTAAAACCTC  
CTGAAGAC-TATGAAT---ACCAGAGTACCTATAAATATACATATTTCTCACCCAAAAGGACAGGGCTCTTATTT-CC  
>Marmoset  
CAT--CCCTAG--TCTGGCTA--ATGAATGGCTGCTTCTGCTTTAC-CACTGATAAATTGAGCCTCAGACCC---TGC  
TCCTGCCTACCACATAA---CGTTCAG--GAGACTTTCATCATAGAAT-CCTTCC-----ATTTCCCGACA----T  
CAATCCAGAGCAAAGCCCTGCTTCCGTGAACC-----AAAACCA----CCCA-----  
----C--T-CACACC----TACTGAGATGCGCTGCGGTCCCAATGGTGTGTGGTCTT-CCCCTGCAACAAGTCAAC  
ACATCCAACCTTTTGTCTGA-----ATTCAGGAG-TACATTCTTGGTGTGATCTTTGCTATAGGACATTGACAT-ATCCA  
TCTGGAAGTCATCAATAA-----CACC--CAGAAGTATGT--TTTAACATTT-GCAGCCTAAACCTAATTTGTTCAT  
CAATTAGGC-ACCTGTGACTTGGAGAAGGTCGATGATAATCTTGGCCGTTTCTTGAATCTCACTGGCTGATGGTAACC  
ATTTT---ACCCA---cgctatgattgggatggttgg---tcc-aaatctcatgttgcatttgatccccccagtg-  
tgggggtgcagcctaaggggaggtggttgggtcacattgcaggaagcagacccctcatgaagagg-taagttccct-g  
gggtcggggcagtttagtgaattcttgtctccaccagttccacagagagctggg-gttaaaaagagcctggta-ttctc  
cttg-ctcttgcctcctctctc----accacgtggt--ggggaaatgcccggctccatttccc-cctcaac---tgtga  
-----gtagcctgaggttttctccaaacgcagatgccagctaccatgcttct-----tgtacagccc  
gcagaacctgaactaaataaac-----ttctaggtaaataactcagcctccggctattccttc-----aagcaacac  
aac-----GCCCA---TCCCTGACTTAATTCCAACAAGGTTATTTTGTATGTTC--AAATTT-TTAAAACCTC  
CTGAAGAC-TATGAAT---ACCACAGTACCTACAAACATAGGCTTTTCTCACCCAAAAG-----

>Tarsier  
TATCGCCCTGC--CCTGGCTA-----TGCTGCTGCTTTA--CATTGATAACTT-----  
-----AA--GAGACCTAATCATAGAATCCCTTCT-----ACTTCCTGACAGCATC  
CAACCCAGAGCAAAGCCCTGCTTCCCTCGAGCCCTC-TCCAGAATCA----CAT-ACCCAAGCCTAAAGCCTCTTAATC  
----C--T-AACACTCTTTTTCTCAGA-GCCATATAGTTCCCAATGGTGTGCACTCTC-CACCTGCCAACAAGTCACT  
GAATCCAA-TTTAGTTCCAGGAGTTTGTTCAGGAG-CATGTTCTTGGTGGCCTCGGCTACAGGAGAT-----  
-----CATC--CAGAAGTGTGT--TATGTCATTT-ACTGCCTAAGCC-----TGTCAC  
ATATTAGTC-ACCTATGATAGGCAGAAGGTCAATGACAAGCTTGGGTA-TTCTGGTATTTACCTGATGATGGCAACC  
ATTTT---ACCCA---tgctacagt-----gttgtaccctccaaaatctcaggtccaaatgat--ccccaatg-  
gcagagggggagcccaatgtgatgcgtttgggtcat-----ggaggtggatccatcataaataaattaa-tgacct-c  
cctcagaggtgaggggatgagtttccactatactagttcccatgagaactgat-gtca--agagcctgccacctccc  
tccacctcttgcttccctctc---gcataggatccctgcacacattggctctcctcctt-ctaccatgagtgcaa  
-----gcagcctgaggccctcacaagatgcagc-----ctctatgcttct-----tgtacagcct  
gcaaaactgtaagccaaataaatctcttttctttataaattatacagtttt-ggtattcctttatagacacactaaac  
agactatgcca--ACCCA--TCCCCAACTTAATCCCAACAAGATTAGTCCAATGTTC--AAATTC-CAAAAACCTTC  
CTGAAGTC-TGTGAAT--GCCAGAG-----GGCTCTTATTC-TC

>Bushbaby  
CATATTCCTGTAGCCTGGTGAACATGAGTGACGGCTGTTGCATTAC-CATTGATAACTTTAGCATCATACT---TCT  
TCCTGCATACT-----TCCAGAA--GTGACCTTGTGATAG-ATCCCGTCT-----ATTTCTTCACAGCATT  
CAATCCAGAGCAAAGCCCTACTTCCCTGGGACCCTCTTCCAAAACCA----CACAATTCAAGCCCAAATCCTATAAATC  
CTTCC--T-TATTACATTTTACCAAGGTGC-----CCAAGTGGTGTGTGGTCTT-CCTGCTGCAACAAGTCAGC  
AGGTCCAACCTTTTATCTGA-----GTTCCAGGAGTTACTCTGGGTGGTC--TGCTACAGGACACTGACAT-----  
-----CATC--CACAAGTTTGTCTATATCATTG-TAGCCTAACAC-----TGTAAT  
AAATAATT--ACTTATGACTTTGAGAAGGTGAGGACAACCCTGGGGA-GTC-TATATTTACCTGTTGATGACAACC  
ATTTT-----

-----ACCCA---TTCCTGACTTAATTCTAACAAGATTATTTCAAT-----TTC-TTAAAACCTTC  
CTGAAGAT-AATGAAT--ACCAGGTATACAGAAATGCACTGACTTCTCACCC-TAAGGAGAGGGCTCTGATTTCCC

>Mouse\_lemur  
CACATCCCTGTA-CCTGGCTAATATGAGTGACTGCTGCAGCTTTAC-CACCAATAACTTTAATCTCATACT---TCC  
TCCTGCCTACTAGATTAAGACGTAGAA--GAGACCTAATCACAGAATCCCTTCTGTTTCCTCATTTCCTCACAGCATC  
CAACCCAGAGCAAAGCCCT-----TCTTCCAAAACCA----CCTAATTCAAGCCCAAATCC-----  
--TTC--A-TAACACCTTCTATTGAGATGCCATAAATCCCAATGGTGCATGGTCTTCCCTGTTGTAACAAGT----  
AGGCCCAACTTTTGTCTGA-----GCTCAGGAA-TATGTTCTTGGTGGTCTTTGCTACAGGACGTTGA-----  
-----CACAAGTATGT--TACATCATTG-GCAGCCTAA-AC-----TGTCAT  
AAATTAGTCAACCTATGACTTGGAGAAGGTCTGTGATAACCTTGGGCA-GTCTTGTATTTGAGCTGCTCATGGCAA-C  
ATTTT-----

-----ACCCA---TTCCTGACTTAATTCCAACAAGATTATTTCAATGTTTC--TAGTTC-TTAAAACCTTC  
CTGAAGATAAACGAAT--ACCAGGTACCCATAAATACACATATTTCTCACCCAAAAGATAGGGCTCTTATTT-CC

>Tree\_shrew  
TATCCCC-AT--CCTGGTTACTATGAGTAACTGTTGCTACTTTATACTTGGATAACTTTAGTCTCATTTCAT---TCC  
TCCTGCCTCCTAGACAA--GATTTAGAAGAGACCTAATCATAGAATCCCTTCT-----ATTTCTGATAGCAGA  
CAATCCAGAGCAAAGCCTTGCTTCCCTTGAACACTC-TCCAAAACCTG----A--AACTCAAGTCCAAACCCATAAATC  
CTTTT--T-AGCACCTTTTTATTGGAATGTCCTATAGTTCCCAAGAGTGCATGATCTTCCCATTGAGGGAAATCAGT  
AAATCCAA-----GTTCCGGGCG-TGTGTTCTTGGTGGTCTTTGCTACAGGACGTTGACATCACC--  
-----CATC--CAGATGTGCAT--TATGTCATGT-GCAGCCTAAACC-----TGCCAT  
AAATTAGTC-ATCTGCATCTTGGAGAAGGTGATGGTAAACTTGCAGCA-TTCTTGTATTTACCTCCTAATGACAACA  
C--TT-----





## Marker M28

>MSTB1

```
-----  
-----  
-----tgctat---agt  
ttgga-----tgtttgtcccctccaaacctcatggtgaaatgtgatcccagtggtggaggtggggcctaagggga  
gggtgtttgggtcatgggggaggatccctcatgaatagattaatgccctc---cctc-----gggggtggggatgagt  
gagttctcactctattagttcccgcgagagctggttgttaaaaagagcctggcacc-tccctcctctctctcttgcct  
cctctctcgccatgtgatctctgcacacgccggctccccttcaccttcgcatgagtggaagcagcctgaggccctc  
accagaagcagatgc---tggcgccatgcttctgtacagcctgcagaaccgtgagccaaataaacctcttttcttta  
taaattaccagcctcaggtattcctttatagcaacacaaaatggactaagaca-----  
-----  
-----
```

>Human

```
AACTAGGAATACAGTGGTATTCTACAGCAGTACTTAAGCCAAAGTCCCAG-TCTTCATCAAGCTTACATTC-----  
---CCATGGAACAT-----ACAGTC-AATAACAAAGTCAACAAATAAGTTCTACAGTTTGAGGCAATAATAAGTTATA  
TGAAGAAAAATAAAGCTGGGAA-----GGAGTATAAA-----GAAT---GGT-GGGG---tgctgctatggt  
ttacatacagatttgtttgtccccttcaagtctcatggtgaaatgtggtcatcaatgtttgaggtggggcctagtggga  
ggggtttaggtcataaggggtggatccctcatgaacggcatggtgccatc---ctc-----attagttgcactctat  
cagttccccagag---agttttcctgaaagctgg-tggtgaaaagggccagggcacc-tcccttccctctcttgcctcc  
tttctc--accatgtgatctctgcacacgccagcccccttccccttcgctgtgagtggaagcagcttgagccctc  
accagaagctgatgc---tgggtgccatgcttcttatacagcctgctgaacagtgagccaaataaacctcttttat-ta  
taaattaccagcgcagatgtattcctttattgcaacgc-aacagg-ctaagaca---GG-----TGGGG-----G  
AAAGCACACCTTCTGAGAGTGGTCCTTTCTAGAGGTGCTCCACTAACCACCCGAGGGAAAAATAGCCCCTGAACTT  
CTGCCATCCCTCTCTATCATTATCAGGCATTATAGTGTATATATATTTCCAGAGCC--TTTAGCTCTGAAAGGAAAA  
-----CCTTATCAAAGAAGGGATGGGGATGGAGGTTTACTCCCTTACT
```

>Chimp

```
AACTAGGAATACAGTGGTATTCTACAGCAGTACTTAAGCCAAAGTCCCAG-TCTTCATCAAGCTTACATTC-----  
---CCATGGAACAT-----ACAGTC-AATAACAAAGTCAACAAAGTAAGTTCTACAGTTTGAGGCAATAATAAGTTATA  
TGAAGAAAAATAAAGCTGGGAA-----GGAGTATAAA-----GAAT---GGT-GGGG---tgctgctatggt  
ttacatacagatttgtttgtccccttcaagtctcatggtgaaatgtggtcatcaatgtttgaggtggggcctagtggga  
ggggtttaggtcataaggggtggatccctcatgaacggcatggtgccatc---ctc-----attagttgcactctat  
cagttccccagag---agttttcctgaaagctgg-tggtgaaaagggccagggcacc-tcccttccctctcttgcctct  
tttctc--accatgtgatctctgcacacgccagcccccttccccttcgctgtgagtggaagcagcttgagccctc  
accagaagctgatgctggtggtgccatgcttcttatacagcctgctgaacagtgagccaaataaacctcttttat-ta  
taaactaccagcgcagatgtattcctttattgcaatgc-aacagg-ctaagaca---GG-----TGGAG-----G  
AAAGCACACCTTCTGAGGGTGGTCCTTTCTAGAGGTGCTCCTCTAACCACCCGAGGGAAAAATAGCCCCTGACCTT  
CTGCCATCCCTCTCTATCATTATCAGGCATTATAGTGTATATATATTTCCAGAGCC--TTTAGCTCTGAAAGGAAAA  
-----CCTTATCAAAGAAGGGATGGGGATGGAGGTTTACTCCCTTACT
```

>Orangutan

```
AACTAGGAATACAGTGGTACTCTACAGCAGTACTT-AGCCAAAGTCTGG-TC-TCATCAAGCTTACATTC-----  
---CCATGGGACAG-----ACAGTC-AATAACAAAGTCAACAAATAAGTTCTATAGTTTGAGGTAATCATAAGTTACA  
TGAAGAAAAATAAAGCTGGGAA-----GGAGTATAAA-----GAAT---GGT-GGGG---tgctgctatggt  
ttacatacagatttgtttgtccccttcaagtatcatggtgaaatgtggtcatcagtggtggaggtggggcctagtggga  
ggggtttaggtcat-ggggtggatccctcatgaatggcatggtgccatc---gtc-----attagttgcaatctat  
cagttccccagag---agttttcctgagagctgg-tggtgaaaagggccggggcacc-tcccttccctctcttgcctcc  
tttctc--accatgtgatttctgcacacgccaatcccccttccccttccactatgagtggaagcagcttgagccctc  
accagaagctgatgc---tgggtgccatgcttcttatacagcctgctgaaaagtgagccaaataaacctcttttct-ta  
t----taccagcc-tatgtattcctttatagcaacgc-aacagg-ctaacaca---GG-----TCGGG-----G  
AAAGCACACTTTCTGAGGGTGGTCCTTTCCAGAGGTGCTCCTCTGACCACCCGAGGGAAAAATAGCCCCTGACCTT  
CTGCCATCCCTCTCTATCATTATCAGGCATTATAGTGTATATATATTTCCAGAGCC--TTTAGCTCTGAAAGGAAAA  
-----CCTTATCAAAGAAGGGATGGGGATGGAGGTTTACTCCCTTACT
```

>Baboon

```
AACTGGGAATACAGTGGTACTCTATAGCAGTACTTAAGCCAAAGTCCCAG-TCTTCATCAAGCTTACATTC-----  
---CCATGGGATGTAATTGACAGTC-AATAACAAAGTCAACAAATAAGTTTTATAATTTGAGGCAATAACAAGTTATA
```

TGAAGAAAAATAAAGCTGGGAA-----GGAGTATAAA-----GAAT---GGC-GGGG---tgcttttgtggc  
ttacgtatgatttgtttgtctccttcaagtctcatggtgaaatttgggtcatcagtggtggaggtggggcctagtggga  
ggcgtttaggccatgggggtggatccctcatgaatggcatggtgccgctc---ctc-----ttagtttgcactcttt  
cagttccccagag---agttttcctgagagctgg-tggtgaaaggactgggact-tccctttcctctcttgcctcc  
tgtctc--accatgtgatctctgcacatgccagcccccttccccttccactgtgagtagaagcagctggagctcctc  
accagaagctgatgc---tggtgccatgcttccctatacagcctgctgaacagtgagccaaataaacctctttct-ta  
taaattaccagcctcgtgtattcctttatagcaacgt-aacagg-ctaagata---GA-----TGGGG-----G  
AAAGCACCCTCTCCTGAGGGTGGTCCTTTCCAGAGGTGCTCCTCTGACCGCCCTGGGGAAAATAGCCCCTGACCGT  
CTGCCATCCCTCTCTATCATTATCAGGCATTATAGTGTATATATATTTCAAAGCC--TTTAGCTCTGAAAGGAAAA  
-----CCTTATCAAAGAAGAGATGGGGATGGAGGTTTACTCCCTTACT

>Rhesus

AACTGGGAATACAGTGGTACTCTATAGCAATACTTAAGCCAAAGTCCCAG-TCTTCATCAAGCTTACATTC-----  
---CCATGGGATGTAATTGACAGTC-AATAACAAAGTCAACAAATAAGTTTTATAATTTGAGGCAATAACAAGTTATA  
TGAAGAAAAATAAAGCTGGGAA-----GGAGAATAAA-----GAAT---GGC-GGGG---tgcttttgtggc  
ttacgtatgatttgtttgtctccttcaagtctcatggtgaaatttgggtcatcagtggtggaggtggggcctagtggga  
ggcgtttaggccatgggggtggat-cctcatgaatggcatggtgccatc---ctc-----ttagtttgcactcttt  
cagttccccagag---agttttcctgagagctgg-tggtgaaaggactgggacc-tccctttcctc-cttgcctcc  
tgtctc--accatgtgatctctgcacatgccagcccccttccccttccactgtgagtagaagcagctggagctcctc  
accagaagctgatgc---tggtgccatgcttccctatacagcctgctgaacagtgagccaaataaacatctttct-ta  
taaattaccagcctcgtgtattcctttatagcaacgc-aacagg-ctaagaca---GA-----TGGGG-----G  
AAAGCACCCTCTCCTGAGGGTGGTCCTTTCCAGAGGTGCTCCTCTGACTGCCCTGGGGAAAATAGCCCCTGACCGT  
CTGCACATCCCTCTCTATCATTATCAGGCATTATAGTGTATATATATTTCAAAGCC--TTTAGCTCTGAAAGGAAAA  
-----CCTTATCAAAGAAGAGATGGGGATGGAGGTTTACTCCCTTACT

>Marmoset

TACTAGGAATACAGTGGTACTCTACAGCAGTACTGAAG-CAAAGTCCCAG-TCTTCATCAAGCCTACTTTC-----  
---CCATGGGACAG-----ACAGTC-ACTAAAAAAGTCAACAAATAACTTCTA-AATTTGAGGCAGTAATAAGTGATA  
TGAAGAAAAATAAAGCTGGGAA-----GGAGTATAAA-----GAAT---GGT-GGGG---tgctgctatggt  
tcgcatagcatttgtttgtccccatcaagtctcatggtgaaattcggtcatcagtggtggaggtggggcctgggtggga  
ggggtttgggtcatgggggctggatccctcatgaatggcatggtgccatc---ctcaaggtaattagtttgcgctctgt  
cagtttccc--ag---agttttcctgagagctgg-tactgaaaggggcggggcacc--cccctccccttccacttcc  
tttctc--accatgtgatctctgcacatgccagcccccttccccttccactgtgagtcgaaacagcttgaggccctc  
accagaggctgatgc---tggtgccatgcttcttgtacagcctgctgaacagtgagccaaataaacctctttct-ta  
taaactaccagactcatgcattcctttacagcaatgc-aacaga-ctaagacg---GGGGGGTGGGGG-----G  
GAAGCACCCTTTCCGGAGGGTGTCTTTCCAGAGGTGCTCCTCTGACC-----  
-----TATCCCTCTCTATCACTGTGACAGATTATAGTGTATATATATTTTCCAGAGCC--TTTAGCTCTGAAAGGAAAA  
-----CCCTTATCAAAGAAGGGATGAGGATAGAGATTTAC-CCCTTACT

>Tarsier

AACTAGGAATAC-----CAGTGCCACACAAGCCAGAGTCCCTG-TCCTCATCAAACCTCCATTT-----  
---CCATGGGAGAG-----TCAGACAAACAACAAAGTCAACAACCAGGTTCTATCATTGAGGCAAAAATAAGCAATA  
GGAAGAAAAATAAAGCTGGGGGTGGGGGTGGAGTACAGA-----GAAT---AATGGGGG---tggtgctatggt  
tt-----tgccaagaatcatattgaagtctgatccccagtggtggagatagggcctgggtggga  
ggtaatttaactcttgg-----ggtagccaccattgtagtc-----atgcgttctcactc--t  
tagtatccgagag---ggttttccctagagttggttgctagagagcctggcaccttccccttctctctaa--ttc  
tctctt--ggtgagtgatct-----gcctactctggttccctctccaccatgagtagaaccttcccaggtcctc  
cacagaagatgatgc---tagcgtgtgcttcttgtacagcctgtgaggcaatgagccaaataatcct-tttct-tc  
aaaattacctggtctcaggtattccttttgagtaacacaaatgaa-ctaagaca---GG-----TGGGG-----  
-CAGTGCCGGTATCCTTAGGGTGGTTC-TTCCAGAGGTGCTTCTCTGATGACCCGAAGGAAAATACCC-----  
CTGTCCATCCCTCTCTATCATTATCTGAAATTATAGTGTT--TATGTTACCAGAGCT--TTTAGCTCTGAAGGGGAAA  
-----TCATGGTCAAGAAAGGGATGGGGGTGAAGGTTCACTCTTTTACT

>Bushbaby

AAGTAGGAAT-----AGTATTATTCAAGCCCAAGTTTCTG-TCCTCATCAAACCTCCACTC-----  
---CCACAGTAGAG-----ACAGAC-AATAACAAAGTGCATGAATAAGTTCTGTAATTTGAGGCAGTAACAGGTGACA  
TGAAGAAAAACAAGCTGGGAA-----GGAGGATGAT-----AAGT-----  
-----  
-----  
-----  
-----

```

-----GG-----TGGGG---TGGAGG
GGAGGGCCACTTTTTCTGAGGGAGGCTCCTTCCTACCAGGACTTCTCTAGACACCT-TTGGAAAATAGTCC-----
CTGTTACACCCTTCCCTCTCCTTATTTG-AATTACAGTGTCTACATGTTTCCAGGACC--TTTAGCTCTGAAGGAGAAA
-----CCTTTATTAAAGAAGGATTGGGGATTGGGGTTTGCTTTCTTACT
>Mouse_lemur
AACTGAGAATAC-----AGTGTTACCCAAGCCAAAGTT--TG-TCCTAATCAAATTTACATTC-----
---CCACAGGACAA-----AC--AC-AGTATCAAGTCCAATAAGTAAGTTCTATAATTTGAGGCAGTAATAGGTGATA
TGAAGAAAAACAAAGCTGGGAA-----GGAGAATAAA-----GAAC-----
-----
-----
-----
-----
-----AG-----TGGGA-----GG
GTAGGGCCACTTTTTCTAAGGTGATTCTTTCTGGAGGTGCTTCTCTGACCACC--TTGGGAAACAGTCCCA-----
CTGCCCCTCCCTTTCTCTCAGTATTTGAAATTACAGTGTTTACATGTTTCCACAGCCTTTTTAGCATTGAAGGGGAAA
-----TCTTTTTTAAAGAAGGAGTGAGGATGGGAGGTTACTCCCTTACT
>Mouse
AGCTAGGAGTAG-----AGTGAAGGTCAAACCAAAGCTGTATGTCTCCATCAGACATACATTCTGGCGG
GAGAGGGAGTGGGG-----ACAGGC-AATGGCAAAGTAAAATATAAGAATATAAGAAGGGAGACAATGAGCA----AC
GTGAAGGAAAAGAGTCTGGGAA-----GGATTCAATCTTTATT--GAAT-----
-----
-----
-----
-----
-----TGTA
TCAGGGATGCTTTGCCAAG---GGTTCTTCCCCAGAGGTCTGTCTATG-----AAGAAAAGTGGCACCC-----
CTGCTCAACCGT-TCTGGGAACTGTGAAATTGTGGTGTT--TGTATTTCCAGAGGG--TTAGGGTGTGCCAGGACAG
AGCTTGCCTTCATCAAGGGCAGACCAGAGATGGGGATCCCCCTCCCCGCT

```

Marker M29

>MSTB1

-----  
-----  
-----  
-----tgctatagtttg--gat  
gtttgtcccctccaaacctcatggtgaaatgatccccagtggtggagggtggggcctaagggagggtggttgggtca  
tgggggaggatcccctcatgaatagattaatgccctcccctcgggggtggggatgagtgagttctcactctattagttccc  
gcgagagctggttgtaaaa-agagcctggcacctcccctcctcctcctccttgccttct-----ctctcgcc--  
-----atgtgatctctgcacacgcccgtccccttcaccttccgccatgagtggaagcagcctgaggcc  
ctcaccagaagcagatgctggcgccatgcttctgtacagcctgcagaaccgtgagccaaataaacctcttttcttta  
taaattaccagcctcaggtattcctttatagcaacacaaaatggactaagaca-----  
-----  
-----

>Human

GCTCAG-----ATTCTCACTGCCAAGTTCTG-----CTTCC-CTTT---GGATCTCATTAAATAGCCACTGCCACCTC  
CTCTGGGTTACTCTCGGTGGTCAAACCTTTCTTTTCGCATTCT-GCCCAAACAGAAT-CCTGAAC-ATACCTTTATG  
GCTACAACCAAGCCATAAGGCTGGAAA-AGACTTTACTTGATACTCAGGGTACCACCACACCCCTCATACCATCAGG  
ATTGTCTTGTGTTGTTTTAATAGAGTAGGTTGCCATAAATGTTTGTAAC---ATGGC---tgctatagtttgctttt  
gtttgcctctccaaatctcatggtgaaatgtgagctctagttttgcatgtggag-ctaagggagggtggttggatca  
taaaggtgagtcctcatgactggccttgatgccgggctaa---tgataaatgagtgagttttgctttatttgtttc  
atgaaagtcggttgtaaaaaagagcctggcacgctccctgctcatgctctcgcctctct-----ctctctctca  
tttctctctcatcatgtgatctctgcacacactgtctccactttaccttccattataagtagaagcagcctgaagcc  
ctcaccagaagcagatgcttgtgccatgctttttatagcctgtagaactggaagccaaataaacctcttttcttta  
taaataccagctctacagtattcctttatagcaacgcaaa-tggacttagata---ATGGCA---TGAGGTAACCAA  
TTACAAAATAGGAACAGCTTTCTAGAGCTCATCTCTGTAGCCCTTTTTACTGGCTGCCCTGTACCCTTCTGGGGGACA  
TCAT---CAAATACCCTTTACAACCCTGGAGTACATGCTTAGGTCTCTTGGCATAAAAACAGAGTTCCTCATGAGAAC  
TCCAGAGAGGCAAGTGGCCTCCTATACCCAA

>Chimp

GCTCAG-----ATTCTCACTGCCAAGTTCTG-----CTTCC-CTTT---GGATCTCATTAAATAGCCACTGCCACCTC  
CTCTGGGTTACTCTCGGTGGTCAAACCTTTCTTTTCGCATTCT-GCCCAAACAGAAT-CCTGAAC-ATACCTTTTATG  
GATACAACCAAGCCATAAGGCTGGAAA-AGACTTTACTTGATACTCAGGGTACCACCACAACCCCTCATACCATCAGG  
ATTGTCTTGTGTTGTTTTAATAGAGTAGGTTGCCATAAATGTTTGTAAC---ATGGC---tgctatagtttgctttt  
gtttgcctctccaaatctcatggtgaaatgtgagctctagttttgcatgtggag-ctaagggagggtggttggatca  
taaaggtgagtcctcatgactggccttgatgccgctgctaa---tgataa-tgagtgagttttgctttatttgtttc  
atgaaagtcagtttgtaaaaaagagcctggcacgctccctgctcatgctctcgcctctct-----ctctct---a  
tttctctctcatcatgtgatctctgcacacactgtctccactttaccttccattataagtagaagcagcctgaagcc  
ctcaccagaagcagatgcttgtgccatgctttttatagcctgtagaactggaagccaaataaacctcttttcttta  
taaataccagctctacagtattcctttatagcaacacaaa-tggacttagata---ATGGCA---TGAGGTAACCAA  
TTACAAAATAGGAACAGCTTTCTAGAGCTCATCTCTGTAGCCCTTTTTACTGGCTGCCCTGTACCCTTCTGGGGGACA  
TCAT---CAAATACCCTTTACAACCCTGGAGCACATGCTTAGGTCTCTTAGCATAAAAACAGAGTTCCTCATGAGAAC  
TCCAGAGAGGCAAGTGGCCTCCTATACCCAA

>Baboon

GCTCAG-----ATTCTCACTCCAAGATTCTG-----TTCCC-TTTG---GGATCTCACTAATAGCCACTGCCTCCTT  
CTCTGGGTTGCTCTCAGTGGTCCAACCTTCTTTTCACATTCT-GCCCAAACAGAAT-CCTGAAC-ATAGCTGTTATG  
GCTACAACCACACCATAAGGCTGGAAA-AGACTTTACTTGATACTCATGGTG-----CCCTCATACCATCAGG  
ATTGTCTTGTGTTGTTTTAATAGGGTAGGTTGCCATAAATGTTTCGTAAC---ATGGC---tgccacagtttggtttt  
gtttgcctctccaaatctcatggttaaatgtgagccatagttttgcatgtggat-ctaagggagggtggttggatca  
taaaggtgaatgactcatgactgtcttgatgctgtgctaa---tggtaa-tgagtgagttttgctttattcatttcc  
atgaaagccaggtattaaaaaagagcctggaacctccctgctcatgctct-----ctctct----  
-----ctcatcatgtgatctctgcacacactgtctccccttcacctccatt-taagcagaagcatcctgaagcc  
ctcaccagcagcagatgctgggtgccatgctttttatagcctgcagaactggaagccaaataaacctcttttcttta  
taaataccagctctgcggcagtcctttacagcaacacaaa-tggactaagata---ACGGCA---TGAGGTAACCAA  
TCACAAAATAGGAACAGCTTTCTAGAGCTCATTGCTGTAGCCCTTTTTACTGGCTGCCCTGCACACTTATGGGGGACA  
TCAT---CAAATACCCTTTACAACCCTGGAGCACATGCTTAGGTCTCTTAGCATAAAAACAGAGTTCCTCATGAGACC

TCCAGAAAGGCAAATGGCCTCCTATCCCCAA

>Orangutan

GCTCAG-----ATTCTCACTGCCAAGGTGCTGCTTCCCTTCC-CTTT---GGATCTCACTAATAGCCACTGCCACCTC  
CTCTGGGTTGCTCTCGGTGGTCCAAATTTCTTTTTGCATTCT-GCCCAAACAGAAT-CCTGAAT-ATACCTCTTATG  
GCTACAACCAAGCCATAAGGCTGGAAA-AGACTTTACTTGATACTCAGGGTACCATCACAACCCCTCATACCATCAGG  
ATTGTCCTGTTTTGTTTTTAATAGAGTAGGTGGTCCATAAATGTTTGTAAC---ATGGC---tgctatagtttgctttt  
gtttgcctctccaaatctcatggttgaaatttgagctctagttttgcatgtggag-ttaatgggaggtgtttggatca  
taaagatgagtcctcatgactggccttgatgcccgtgctaa---tggtaa-tgagtgagttttgctttactcgtttcc  
atgaaagtccggttgtaaaaaagagcctgggacctccctgctcatgctctcactctctctctcctcctctctca  
tttctctctcatcatgtgatctctgcacacactgtctccacttcacactccattataagtagaagcagcctgaagcc  
ctcaccagaagcagatgcttgtgcccctgtcttttatatagcctgtagaactgaaagccaaataaacctcttttcttta  
taaatcaccagctctacagtattcctttatagcaacacaaa-tggacttagata---ATGGCA---TGAGGTAACCAA  
TTACAAAATAGGAACAGCTTTTCTAAAGCTCATCGCTGTAGCCCTTTTTACTGGCTGCCCTGTACCCTTCTGGGGGACA  
TCAT---CAAATACCCTTTACAACCCTGGAGCACATGCTTAGGTCTCTTAGCATAAAACAGAGTTCCTCATGAGACC  
TCCAGAGAGGCAAGTGGCCTCCTATACCCAA

>Rhesus

GCTCAG-----ATTCTCACTCCAAGTTCTG-----TTCCC-TTTG---GGATCTCACTAATAGCCACTGCCTCCTT  
CTCTGGGTTGCTCTCGGTGGTCCAACCTTCTTTTACATTCT-GCCCAAACAGAAT-CCTGAAC-ATAGCTGTTATG  
GCTACAACCACACCATAAGGCTGGAAA-AGACTTTACTTGATACTCATGGTG-----CCCTCATACCATCAGG  
ATTGCTTTGTTTTGTTTTTAATAGGGTAGGTGGTCCATAAATGTTTATAAC---ATGGC---tgccacagtttggtttt  
gtttgcctctccaaatctcatggttcaaatttgagctatagttttgcatgtggat-ctaaggggaggtgtttggatca  
taaaggtgaatgactcatgactgtcttgatgctgtgctaa---tggtaa-tgagtgagttttgctttattcatttcc  
atgaaagccaggtattaaaaaagagcctggaacctccctgctcatgctct-----ctctctctca  
tttctctctcatcatgtgatctctgcacacactgtctccccttcaccctccatt-taagtagaagcagcctgaagcc  
ctcaccagtagcagatgctggtgcccctgtcttttatatagcctgcagaactggaagccaaataaacctcttttcttta  
taaatcaccagctctacagctcggcagctctttacagcaacacaaa-tggactaagata---ACGGCA---TGAGGTAACCAA  
TCACAAAATAGGAACAGCTTTCTAGAGCTCATTTGCTGTAGCTCTTTTTACTGGCTGCCCTGCACACTTATGGGGGACA  
TCAT---CAAATACCCTTTACAACCCTGGAGCACATGCTTAGGTCTCTTAGCATAAAACAGAGTTCCTCAT-AGACC  
TCCAGAAAGGCAAATGGCCTCCTATCCCCAA

>Marmoset

GCTCAG-----ATTCTCACTCCAAGTTCTG-----CTTCC-CTTT--GGGATCTCACTAATAGCCACTGCCACCTC  
CTCTGGGTTGCTCTCGGTGGTCCAACCTTCTTTTACATTCCAGGCCAAACAGACTCCCTGAAC-ATAGCTCTTATG  
GCTACAACCAAATCATAAGGCTGG-AA-AGACTTTACTTGATACTCAGGGTACCACCGCAC-CCCTCATGCCATCAGG  
AGTGTC----TTGTTTTTAATAGGGTAGGTGGTCTGTAAATGTTTGTAAC---ATGGC---tgctatagtttggt-ttt  
gtttgcctctccaaatctcatggttgaaatttgagctccagttttgcatg-gggg-caaatgggagggcgtttggatca  
taaagggcaatccctcatgactggccttgatgctgtgctca---tggtaa-tgagtgagttttgctttattaatttcc  
atgaaagccggtgggtttaaaaagag-ctggcacctccctgctctctctttctctcacttt-----ctctctctca  
cttctctctcatcatgtgatctctgtacatagtgcttccccttcaccctccatcataagtagaagcagcctgaagcc  
cttgccagaagcagatgctggtgcccctgttttatatagcctacagaactagaagccaaacaaacctcttttcttta  
taaatcaccagctctgaggtattcctttacagcaacacaaa-tggactaagata---ATGGTG---TGAGGTAACCAA  
TTACCAAATAGGAACAA-TTTCTAGAACTCACCCTGTAGCCCTTTTTACTGGCTATCCCACACCTTTCT-GGGGACA  
TCAT---CAAATACACTTTACAACCCTGGAGCACATGCTTAGGTCTCTTAGCATGAAACAGGGTTCCTCTCGAGACC  
TCCAGAGAGGCAAGTAGCTTCTATCCCCAG

>Tarsier

ACTCA-----CTTCTCACTTCTAAGGCTCTG-----CTTCC-CTTTGGGGGGTTTTCACTAATAGCCATTGCCACCTC  
CTCTGGGTTGCTTAGGCAATCCATCTTCTTTTACCTTCCAGTCCAAATAGAATCCCTGAAC-ATAGCATATATG  
GCTGCAGTCAAGTCATAAGCCTGGGAC-AGA-TTTACTTGATACTCAGGGTGCCAGCATACTTTTCTACAGTCAAG  
A-----TTTCATAGGTTAGCT---CTATAAATGTTTGAGC---A-----tttgg-ttt  
gtttgacctcttcgaatctcatggaaaaatttaaaacccagtggttgggtggggcctaa-gggtgacgtttgggtca  
tgcgggcagatccctcattaatggcttgggtgctgctctca---tagtaa-taagtaagttttcactccattagctcct  
ac-----aagagcctggcactctccctact-----ctctttcttg  
cttcccctcttgccatgtgatctctgcacacacaggttctccctcaccttccctccataagtgcaagca--ccgaaacc  
ctcatgagaagcagatgctggtgacacacttcttatacaacctacagaactgtgagacaaataaatctgttttcttta  
taattatccagctcttgggcattcctttatagcaacacaaa-caaa-gaagaca---ATGGCA---TTAGGTAACCAA  
TTACAACAGAGGGTCAACTTTTTAGGGTTCTTGCTGTAGCTCTTCTGCTGACTACTCTGCACCCCTCTGGTGGACA  
CCAT---CAAACAC-CACTGCAACCCAGAAATACATGCTTAGCACTCTTAGCATAAATATATATTCACTCTTGGGACC  
TCCAAAAGGCAAGTGGCTTTCTATGCCCA

>Bushbaby

```
ACTCA-----TTCTCACCTCCAAGGCTCTG-----TTTCC-CTTT-AGGAATCTCACTAAGAGCCATT-----  
-----GCTGCTTTAGGTGGTCCAACCTTCTCTTTTACATT-----CAAATGGAGTCCCTGACC-TTACCTCCTATG  
GATACAATCAAGCCATGAGGCTGGAAC-AGACTTTACCTGA-----TACACCTCT-----TTAGA  
ATTGTCTTGTGTTTTGTTTTAATATGGTAGGTGCTCTATAAATGTCTGTAAC-----  
-----  
-----  
-----  
-----  
-----ATGGTA---TTA-----A  
TTATAAATGGGGTTAACTTCTAGAGCTCTTTGCTCTAGCCCTTCTACAGGCTGATCTGCACCCTTCTGGTGGGCA  
CCAT---CAAATAGCTCTTGGCAACCCAGAAGCATGTGTTTAGGGCTCTTAGCATAAATATGATCCCTTT-CAAACC  
TCCAGAGGGGCAAGTGGCATCCTAGCCACAG
```

>Mouse\_lemur

```
ACCCA-----TTCTCACC-CCAAAGCTCTG-----CTTCC-CTTT-GGGGATCTCACTAGGAGCCACTGCTGCCTC  
CTTTGGGCTGCTTTAGGTGATCCAACCTTCTCTTTTACATTCCAGTCCAAACAGAGCCTCTGGCC-ATAGCTCTCAC-  
GACACAACCAAGCCATGTGGCTGGAAC-AGACTTTACCTGAGACCCAGGATACCACCACACCCCT-----TCAGG  
ATCATATTGTTTTGTTTTAATATGGTAGGTTCTCTATAAATGTTTGTAAAC-----  
-----  
-----  
-----  
-----  
-----ATGGCA---TCAGGTAGCTAA  
TTACAAATGGGCTCAACTCTCTAGAGCTCTTTGCTCTAGTTCTTCTACTGGCTGGTCTGCACCCTTCTGGTGGGCA  
CCAT---CAAACAGCCCTTGGCAACCCAGAAGCACGTGCTTAGGTCTCTTAGCATAAATATGATCCCTTTGGGGATC  
TCCAAGAGGCAAATGGCATCCTATCCCCAG
```

>Guinea\_pig

```
AGTGCG-----ATTGTCCT-CCAAAACCTCTA-----CTGTC-CTAG---GGGG-TCACTAATCTTC-CTGCCACCTC  
TACTACATTGCTTTAGATGAGCCAGTGACCTCTTTTACATTTGAGCCCAAACAGAATCCTTGAAC-ACAGTTTATTTG  
CTTACAACCAGG-CTGTAGCCTAGAAC-AGATTGTACTTGATCCTCAGGACAACATCGCACCCCTTCTAACATTAGG  
ATTGTTTTGCTTG---TTAA--CATTAGGTGCTCTGCAAATGTCTATAACC-----  
-----  
-----  
-----  
-----  
-----ATGGCA---TCTGGTGATCAA  
GTACAAACTCAGGTCAACTTTCTAGAGCTCCTTCTTCCAGTCTTCTACTGACTGGTCTGCATCCTTCTCTGGACA  
GCTT---CAAAGCACTCTCTTAAAACCCAGAAGCATGTGCTTACATGTCTGAACATAAAT-TCCCTTCT---GACACC  
TCTCGAGAGGTAAGTGGT-GTTCCTTCCCAG
```

>Mouse

```
ATTGAG-----ATTCTACCC-CC-AGGCTCTT-----TCTCC-TTTG---GGAACCTCAGTAATGGCC-TTGACACCTC  
TGCTGGGTGACTGAAGGTGACCTAACTTCTGTTTCACTGTGAAGTCCAGACAGAATCCACACAT-GTAGTTCTTTGTA  
TCTATAACTAGG-CACGGGACTGGAAC-AGACTTGATTTGCTACTCAGGATGCCATTACCCCATCTCTACAGCTATG  
ACTGTCTTGTGTTTTGTTTTAATTCTCTATGTGCCTTAACAATCTTTATGAT-----  
-----  
-----  
-----  
-----  
-----GTGGTA---CTAGGTAATCAA  
TTACAAA-CAGACTCAACATCTAAAAGTTGTTGCCTCAACCCTTCTTCTGGCTATTAGA---TTCCTC-----  
---T---CAAATACCTCTTGTACCCCAAAGCACATGATTAGGATTTTTAGCATAAATGTGGTTTTCT-----GTCC  
TCCAGACAGGCCAATG---TCCCCTCTCTAA
```

>Dog

TCCCAGGCTTCCCGGTCACCCCCAAGGCTATG-----CTTCCGCTTG---GGAGCTCAGTAATGGCCAAAACCGCCTC  
TGCCTGGTGGTTTTAGATGGTCTGACTTCCTTTTTTACATTTTACAGCTGAAGTGGAAACCCTGAACCCTACCTCTTCTA  
GCTAAAACCATAACCATAAGGTTTGAATAAACTTAACTGCTACTCAGGTTTTCCACCACA-CCCTCCCTGCAGTCAGT  
GTGGTCTTATTTGTTTTTAATGTAGTAGGTTCTCTATTAAGGTTTATAAC-----  
-----  
-----  
-----  
-----  
-----

-----ATGGCA---TTTGGTAATCGG  
TTACAAAACAA-----TTTTGAGA-CTTTCTGTTCTAGCCTTTCTTACTCACTAGTCTTCACCCTCTTGGTGGAGA  
CCAT---CAAAGCACCCCTTACAACCCAGGAGCATGTGTATAGCCCACCTTAGCATAAAAATATGGGTTTCTC-TGATACC  
TCCAGAGAAGCAAGTGGTGTACCTCCCCAG

>Horse

TCTCAA-----GTTCTCACCCCA-ACCCTCCA-----CTTCC-CTTT---GGATCTCACTAATAGCCAATGCCACCTC  
CACCTGGTTGTTTTAGGTGGTCTGACTTCCTCTTTTATATTCTGCCCCAAACGGAAACCCTATACCCTACCTCATATG  
GCTAAAACCAGGCAGTAGGGTTTGAACGAGACTTTGCTGGCTGCTGAGGATACCACCACACCCCTCCCTGCAGTCAGA  
ATGGTCTGTTTTGTTTTTAATACGGTAGATGCTCTATCAACGTTTGTAAAC-----  
-----  
-----  
-----  
-----

-----ATGGCA---TTAGGTACTCAA  
CTACTAAATAGAATCAACTTTTTGAGAGCTCATTGCTCCAGCCCTTCTACTGACTGGGCTGTGCCCTCCTGGTGGAGA  
CCCTTTTACAAAGCACCCCTTGCAACCCA-AAGCATATGCTTAGCTATGTTGGCGTAAAATATGGTTCTTCTTGGTACC  
TCCAGAGAGGCAAATAGTGTCCCCTCCCCAG



## Marker M30

>MSTB1

```
-----  
-----  
-----  
-----  
-----tgctatagtttgatggtt-gt  
cccctccaaacctcatggtgaaatgatccccagtggtggaggtggggcctaaggggaggtggttgggcatggggg  
cggatcc---ctcatgaatagattaatg--ccctccctcgggggtggggatgagtgagttctcactctattagttcccg  
cgagagctggttgtaaaaagagcctggcacctccctcctctctctctctctctctctctctcgcctatgctctctgca  
cacgccggctccccttcacctccgcatgagtggaagcagcctgagggcctcaccagaagcagatgctggcgccatg  
cttcttgtagcctgcagaaccgtgagccaataaacctcttttc-----ttataaattaccagcctcaggtatt  
cctttatagcaacacaaaatggactaagaca-----  
-----
```

>Human

```
GGCTAATGTTGGTTCCCCCTCCCCAAG-AAATGG---AGGCAGAAAAGTCCCTCCATGAAGATAGGTTCCATAGTAG  
GCCTGTGAGATGGCGCTGTGGGACCTGTCACAGGGG-GA-AGATCAGGGAAACAGAAGATGGCACCCAGTGGCAGCCC  
CC-----TGAAG-----AAGT-AATGTCCTTTGAGGTGAATTGCTTCCAATCTTGCCACTTCT--TGTTTATT  
TACTCC-AGAA---TTTTTAATGAAGCCTAATC-----CAGG---GGGCC---tgatatagtttgagtatttttt  
ccccttcaaatcttatggtgaaatgatccccagtggtggaaggtagggcctggtaggggggtggttggggtt-gtgggg  
gcagaaa--gctcataaccaacttgggtgctattctcctcttggaatgtgtgagtgtaactg---tattagttcctg  
caagatctgattggtgaaaagatcctggcaactcttccc-actctcttgtttctctctcttgccatgtga-----  
cacacctgggtccccttccccttctgacatgagtggaagtagctctagtccttagctgggagcagatgctgggtgcctg  
cttcttgtagcctgtagcaaccatgagccaataaacctcttttttaaaaatacataaattacctagcctcaggtatt  
cctttatagaaacacaaacag-actaagaca---GAGAT---C-----TTTCTGGTTTCAGCTCC-ACCTCCAGGC  
ATGAGGGAAGGCCCTTAGCATCCA-AGTG--ATCCTCTC-
```

>Chimp

```
GGCTAATGTTGTTCCCCCTCCCCAAG-AAATGG---AGGCAGAAAAGTCCCTCCATGAAGATAGGTTCCATAGTAG  
GCCTGTGAGATGGCGCTGTGGGACCTGTCACATGGG-GA-AGATCA-GGAAACAGAAGATGGCACCCGGTGGCAGCCC  
CC-----TGAAG-----AAGT-AATGTCCTTTGAGGTGAATTGCTTCCAATCTTGCCACTTCT--TGTTTATT  
TACTCC-AGAA---TTTTTAATGAAGCCTAATC-----CAGG---GGGCC---tgatatagtttgagtatttttt  
ccccttcaaatcttatggtgaaatgatccccagtggtggaaggtagggcctggtaggggggtggttggggtt-gtgggg  
gcagaaa--gctcataaccaacttgggtgctattctcctcttggaatgtgtgagtgtaactg---tattagttcctg  
caagatctgattggtgaaaagatcctggcaactcttccc-actctcttgtttctctctcttgccatgtga-----  
cacacctgggtccccttccccttctgacatgagtggaagtagctctagtccttagctgggagcagatgctgggtgcctg  
cttcttgtagcctgtagcaaccatgagccaataaacctcttttttaaaaatacataaattacctagcctcaggtatt  
cctttatagaaacacaaacag-actaagaca---GAGAT---C-----TTTCTGGTTTCAGCTCC-ACCTCCAGGC  
ATGAGGGAAGGCCCTTAGCATCCA-AGTG--ATCCTCTC-
```

>Orangutan

```
GGCTAATGTTGGTTCCCCCTCCCCAAG-AAATGG---AGGCAGAAAAGTGCCTCCATGAAGATGGGTTCCATAGTAG  
GCCTGCGAGATGGCGCTGTGGGACCTGTCACAGGGG-GA-AGATCA-AGAAACAGAAGATGGCACCCGGTGGCAGCCA  
CC-----TGAAG-----AAGT-AATGTCCTGTGAGGTGAATTGCTTCCAATCTTGCCACTTCT--TGTTTATT  
TACTCC-AGAA---TTTTTAGTGAAGCCTAATC-----CAGG---GGGCC---tgatatagtttgagtatttttt  
ccccttcaaatcttttggtgaaatgatccccagtggtggaaggtaggg-ctggtagaggggtggttggggtt-gtgggg  
gcagaaa--gctcataaccaacttgggtgctattctcctcttggaatgtgtgagtgccaactg---tatcagttcccg  
caagatctgattggtgaaaagatcctggcaactcttccc-actctcttgtttctctctcttgccatgtga-----  
cacacctgggtccccttccccttctgacatgagtggaagtagcttttagtccctagctgggagcagatgctgggtgcctg  
cttcttgtagcctgtagcaaccatgagccaataaacctcttttttaaaaatacataaattacctagcctcaggtatt  
cctttatagaaacacaaacag-actaagaca---GAGAT---C-----TTTCTGGTTTCAGCTCC-ACCTCCAGGC  
ATGAGGGAAGACCCTTAGCATCCA-AGTG--ATCCTCTC-
```

>Baboon

```
GGCTAATGTTGGTTCCCCCTCCCCAAG-AAATTG---AGGCAGAAAAGTGCCTCCATGAAGATAGGTTCCACAGTAG  
GCCTGAGAGATGGCGCTGTGGGACCTGTCACAGGGG-AG-AGATCA-GGAAACAGAAGATGGCACCCAGTGGCAGCCC  
CC-----TGAAG-----AAGT-AATGTCCTGTGAGGTGAATTGCTTCTAATCTTGCCACTTCT--TGTTTATT  
TACTCC-AGAA---TTTTTAATGAAGCCTAATC-----CAGG---GGGCC---tgatatagtttgagta-ttttt  
ccccttcaattcttatggtgaaatgatccccagtggtggaagatagggcctggtagggagtggttggggtt-gtgggtg  
gcagaat--cctcatgaccaacttgggtgctattctcctcttggaatgtgtgagtgtaactg---tattagttccca
```

caagatctgattggtgaaaagagccagggcagctcttccc-----tgtttcctctcttgcctatgtga-----  
cacacctggtcccccttcccccttctgacatgagtgaagtagcttttagtccgtagccaggagcagatgctggtgccata  
cttcttgtgcaactctgcagaaccatgagtcaaataaacctctttttaaaaatacataaattacctagcctcaggtatt  
cctttacagaaacacaaacag-actaagaca---GAGAT---C-----TTTCTGGTTTTAGCTCC-ACCTCCAGGC  
ATGAGGGAAGGGTCTTAGCATCCA-AGTG--GTCCTCTC-

>Rhesus

GGCTAATGTTGGTTCCTCCCTCCCAAG-AAATGG---AGGCAGAAAAGTGCCTCCATGAAGACAGGTTCCATAGTAG  
GCCTGAGAGATGGTGTGTGGGACCTGTACAGGGG-AG-AGATCA-GGAAACAGAAGATGGCACCCAGTGGCAGCCC  
CC-----TGAAG-----AAGT-AATGTCCTGTGAGGTGAATGGCTTCTAATCTTGCCACTTCT--TATTTATT  
TACTCC-AGAA---TTTTTAATGAAGCCTAATC-----CAGG---GGGCC---tgatatagtttgagta-ttttt  
ccccctcaattcttatggttgaagtttgatccccagtggtgaagatagggcctggtaggggggtggttggggtt-gtgggg  
gcagaat--cctcatgaccaacttgggtgctattctcctcttggtaagtgtgtgagtgctaactg---tattagttcca  
caagatctgattggtgaaaagagccagggcagctcttccc-----tgtttcctctcttgcctatgtga-----  
cacacctggtcccccttcccccttctgacatgagtgaagtagcttttagtccatagccaggagcagatgctggtgccata  
cttcttgtgcaactctgcagaaccatgagtcaaataaacctctttttaaaaatacataaattacctagcctcaggtatt  
cctttacagaaacacaaacag-actaagaca---GAGAT---C-----TTTCTGGTTTTAGTTC-ACCTCCAGGC  
ATGAGGGAAGGGCCTTAGCATCCA-AGTG--GTCCTCTC-

>Marmoset

GGCTAATGTTGGTTCCTCTCCCTCCCAAG-AAATGG---AGGCAGAAATGTGCCCCCATGAGGGTTCGTTCCATAGTAG  
GCCCCGAGAGACGACGTTGGGGGACCTGTACAGGGG-AG-AGACTA-GGAAACAT--GATGGCATCCGGTGGCAGCC-  
CC-----TGAAG-----AAGT--ATGTCCTTCGAGGTGAATTGCTTCCAATCTTGCCATTTCT--TGTTTATT  
TACTCC-AGAA---TTTGTAGTGAAGCCGAATC-----CAGG---GGGCC---tgatataatttgaatg-tttgt  
ccccctcaaatcttatggttcaagtttgatctccaaagttggaggtagggcctggtaggggggtggttggggtt-gtgggg  
gcagaat--cctcatgaccagcttgggtgctattctcctcttggtaatgcatgagtgctaata---tattagttcca  
taagagctgattggtgaaaagagcctggcaactcctcccc-actctctctggttctctcttgcctatgtga-----  
cacacctggtcccccttcccccttctgacctgagtggaagcagctatagagccccctggctgggaa-agacactagtgccacg  
tttctcgtacagctctgcagaaccatgagccaaagcctcttttttaaaaatacataaattacctagccttagatatt  
cctttctagaaaacacaaaag-actaagaca---GAGAT---C-----CTTCTGGTTTTAGCTCC-ACCCGAGGC  
AACAAGGAAGGGCCTTAGCATCCA-AGTT--GTCCTCTC-

>Tarsier

GGCTAATGCTCG-TCCCTCTCCCTCCCAAG-AAGCAGGTTAAGCAGGAAAGTGTCTCCATGAAAACAGGTTTTCACAGAAG  
GCCTGAAAGATGGGAGAGTGGAAACCTGTACATGGG-GGCAGACCA-GGAGACAG-AGAAGGTATCTGGTGGCAACCT  
CCTCACCAAAGTTGAAG-----AAGTAAATATCCTACGAGGTGAATTTTCTCTAGTCTTGCCA---CC--TATTTATT  
TACCCTGGGAA---TTTTTAATAAAGCCTAATC-----CAGG---GGGTC---tgacatagtttagata-tttgt  
ctcctctatatctcatggttgaagcttgatccccagtggttagaggtggagcctggtaggggggtggttgggttcatgaag  
ggtggatccccctcatgaacagtttgggtgctgttccca---cagattgagggagctctcctc---aataagaaccg  
gagatcctgattgctg-ccagagcctggcaccatctcacc-tctctcttgcctcctctcttggcatgtga-----  
-----ctcttctgctatga-tcatcatcctcccaaacctcctcagaaacagatgctggcactata  
cttcttgtacagcccgcaggactgtaagccatataaacctcttttc---tttatatgtaacttagcct-aagtatt  
ccttcacagaaacaccaacgg-aaaaagata---GGACC---C-----ATTCTTGTCTCAGTTCT-CTCTCCAGGC  
ATGAGGGAAGGCCTTAATTTCTG-AGTA--GTGCTTTCT

>Bushbaby

-----AGGC-----CTTGTTGAGGGTAGGTTTTCATCCTAG  
GCTTAAGAGATGGTGTGTGGGACTTCCCATGTGGACAG-AGACTA-GGAGAATG--AAGCCACCTAGAGGGAGCCT  
TCTGTC-----TGGAG-----AAGA-AATGTTCTGTGAGGCGAATGGTTTCCAGTCTGCAATTTTT--AGTTTACT  
TTCTCT-GGGA---TTGAA-----GCATCATTCGGGGCAGG-----  
-----  
-----  
-----  
-----  
-----  
-----  
-----  
-----  
-----GGGC---C-----TTTGTGGTCTCAGCACT-ATC-----  
-----GAAAGATCTTTGCATCTG-TGTT--G--CTTATC

>Mouse\_lemur

-----AGGT-----CACGCTGAGGGTGTGTTTTCATTGTAG  
GCCTAAGAGATGGTGTGTGGGACCTGCCATGTGGGCAG-AGACCA-GGAGACAGAAACAGGCAGCGGGAAGTAGCCT  
CTTTAT-----TGAAG-----AAGT-AATGTCCTCTGAGATGAATTGTCTCCAGTCTGCACTTCT--TGTTTATT



## Marker M34

>MSTB1

```
-----  
-----tgctatagtttggatggttg--  
-----tccccccaacacctcatggtgaaatgatccccagtggtggaggtggggcctaataaggagggtggttgggtca  
tgggggaggatccctcatgaatagattaatgccctccctc-ggggtggggatgagtgagttctcactctattagttcc  
cgcgagagctgggtggttaaaaagagcctggcacc-----tccctcctctctctcttgcctcctcctc  
gccatgtgatctctgcacacgccggctccccctt---caccttcgccatgagtggaagcagcctgaggccctcacca  
gaagcagatgctggcgccatgcttctgtacagcctgcagaaccgtgagccaaataaacctcttttctttataaatta  
cccagcctcaggtattcctttatagcaacacaaaatggactaagaca-----  
-----
```

>Human

```
TTTTCTCTTTATCATCTAAGGTTGGATATCTCCTCCAGGTTACACAGGAC-----ATAGCAGTTGCTTGAGATG  
GAACAA-----TCTAAAAGCAAATGATGTAAGTTAAAAGAACATA---CAACC---tgatatagtttggatatttg--  
-----ttccctccaaatcacttggtgaaatgatcctcagtggtggaagtggggcatagtgaggcacttgggtca  
tgggagcagatcgctcatgaacaacttggtgtcaccct-cagggtaatgggtgag-----tcgctctattagttcc  
tgggagaactgattggttaaaaagagcctgccacctccattttctctctctcctttctcttttgcctcctaatttcttt  
gccacgtgacctctgcacatgccagctgccctttgccccatctcaccgtgaag-----tgaaatcctcacca  
gaagcaaatgctggcaccatgcttcatgtacagcatgcagaactatgaaccaaataaacctctctctgtataaatta  
ctcagcctctgggtatttctttattgcaatgcaaa-taaactaagaaa---TGGCC---ATTTTCAGTTCTATGTATAAC  
TGC-TT-ATTCTTACTGGCAAAACTTCCCCTTCC-AACCAACT
```

>Chimp

```
TTTTCTCTTTATCATCTAAGGTTGGATATCTCCTCCAGGTTACACAGGAC-----ATAGCAGTTGCTTGAGATG  
GAACAA-----TCTAAAAGCAAATGATGTAAGTTAAAAGAACATA---CAACC---tgatatagtttggatatttg--  
-----ttccctccaaatcacttggtgaaatgatcctcagtggtggaagtggggcatagtgaggcacttgggtca  
tgggagcagatcgctcatgaacaacttggtgtcaccct-cagggtaatgggtgag-----tcgctctattagttcc  
tgggagaactgattggttaaaaagagcctggcaccctccattttctctctctcctttctcttttgcctcctaatttcttt  
gccacgtgacctctgcacatgccagctgccctttgccccatctcaccgtgaag-----tgaaatcctcacca  
gaagcaaatgctggcaccatgcttcatgtacagcatgcagaactatgaaccaaataaacctctctctgtataaatta  
ctcagcctctgggtatttctttattgcaatgcaaa-taaactaagaaa---TGGCC---ATTTTCAGTTCTATGTATAAC  
TGC-TT-ATTCTTACTGGCAAAACTTCCCCTTCC-AACCAACT
```

>Orangutan

```
TTTTCTCTTTATCATCTAAGGTTGGATATCTCCTCCAGGTTACACAAGAC-----ACAGCAGTTGCTTGAGATG  
GAACAA-----TCTAAAAGCAAATGATATAAGTTAAAAGAACATA---CAACC---tgatatagtttggatatttg--  
-----ttccctccaaatcacttgctgaaatgatccccagtggtggaagtggggcatagtgagaggcacttgggtca  
tgggaacagatcgctcatgagcaacttggtgtcaccct-caggataatgagtgag-----tcgcctctattagttcc  
tgggagaagtgattggttaaaaagagcctggcaccctccattttctctctctcctttctcttttgcctcctaatttcttt  
gccacgtgacctctgcacatgccagctgccctttgccccatctcaccatgaag-----tgaaatcctcacca  
gaagcaaatgctggcaccgtgcttctgtacagcatgcagaactatgaacaaaaaacctctctctgtataaatta  
ctcagcctctgggtatttctttattgcaatgcaaa-taaactaagaaa---TGGCC---ATTTTCAGTTCTATGTATAAC  
TGC-TT-ATTCTTACTGGCAAAACTTCCCCTTCC-AACCAACT
```

> Baboon

```
TTTTCTCTTTATCATCTAAGGTTGGATATTTCTCCTCCAGGTTACACAAGAC-----ATAGCAGTTGCTAAAGATG  
AAACAA-----TCTAAAAGCAAATGATGTAATTTAAAAGAACATA---CAACC---tgatatagtttggatattcg--  
-----ttcccttcaaatcacttggtgaaatgtaatccccaatggtggaagtggggcttagtgggaggcatttgggtca  
tggg-gcagatccctcacgagcagcttgttgcacatccttcatggtaatgaatgag-----taagtctattagttcc  
tgggagaactgattggttaaaaagagcctggcaccctccattttctctctctcctttctcttttgcctctgatttcttt  
gccccgtgacctctgcacatgccagttccccctttgccc--atctcaccatgaag-----tgaaatcctcacca  
gaagcaaatgctggcaccatgcttctgtacagcatacagaactatgaaccaaataaatctcttttctgtatgaatta  
ctcagcttccagcatttctttattgcaatgcaaa-taaactaagaaa---TGGCC---ATTTTCAGTTCTATGTATAAC  
TGC-TTTATTCTTACTGGCAAAACTTCCCCTTTC-AACCAGCT
```

>Rhesus

```
TTTTCTCTTTATCATCTAAGGTTGGATATTACCTCCAGGTTACACAAGAC-----ATAGCAGTTGCTAAAGATG  
AAACAA-----TCTAAAAGCAAATGATGTAATTTAAAAGAACATA---CAACC---tgatatagtttggatattcg--  
-----ttcccttcaaatcacttggtgaaatgtaatccccaatggtggaagtggggcatagtgaggcatttgggtca  
tggg-gcagatccctcacgagcagcttgttgcacatccttcatggtaatgaatgag-----taactctattatttcc
```





## Marker M34

>MSTB1

```
-----  
-----  
-----tgctatagtttggatgtttgtcccctccaaacctcatggtgaaatttgat  
ccccagtggtggaggtggggcctaattgggaggtgtttgggtcatgggggaggatccctcatgaatagattaatgccct  
ccctcgggggtggg--gatgagtgagttctcactctattagtt-----cccgcgagagctgggtggt-----aaaaag  
agcctgg----cacctcc--ctcctctctctcttgcctcc--tctct-----cgccatgtgatctctgc  
acacgccggctccccttcaccttcgccatgagtggaagcagcctgaggccctcaccagaagcagatgctggcgccat  
gcttctgtacagcctgcagaaccgtgagccaaataaacctcttttctttataaattaccagcctcaggtattcctt  
tatagcaacacaaaatggactaagaca-----  
-----
```

>Human

```
CCTCCTCCCTCATAGCCTCTTTCTGAAGAGCATTCCCTCAATAAATAATGGCACCTGAAT-CCTTGTCTCAGGCTCTG  
CTCCTGAAAGTCCAACATAAAACAGTGTACCTCCAGGTTAGGCTATTGTCTCAAAACCT-GAATTATTTTGGCTTAAT  
TTAGATTGTATTGGAAT---AAATG---tgctatagtttagagattcgtccc-cacaaaccccatggtgaaagtcttat  
cc-caatggttagagatgggacctgatgaaaggtgtttgggtcatgagggtggattccccacgagtag----atgccct  
ctctggggaagggagagtgatgagctcttgcctctattaatt-----cccacaagagctgggtggt-----aaaaag  
agcctgg----cacctcc----ctcctttcccttgccttc--tctctctcacttcccctcttaccatgtgatctctgc  
acatgctgattccccttccctcttctgcatgagtggaacag-ttgaggccctcac----agcagatgctggcaccat  
gcttctgtacagcctgcagaactgtgagccaaataaacctcttttatttataaattaccagcctcaagtattcctt  
tatatcaacacaaaatggactaagaca---AAATC---CTTCCTCATTTTGAGGTCACATAAATGTAATAAATTTTG  
AGTAGGTTCT-----TAGAATTACAAATAT-----ATTGTATACAA  
AGGCAGAACTTTCCATATTTTCAGT---TGGCCAGTTCATTGCCATCCAAGCTGTGACGGTGTGAGAAGGAAAATAG  
GAATGCTTTTATT
```

>Chimp

```
CCTCCTCCCTCATAGCCTCTTTCTGAAGAGCATTCCCTCGATAAATAATGGCACCTGAAT-CCTTGTCTCAGGCTCTG  
CTCCTGAAAGTCCAACATAAAACAGTGTACCTCCAGGTTAGGCTATTGTCTCAAAACCT-GAATTATTTTGGCTTAAT  
TTAGATTGTATTGGAAT---AAATG---tgctatagtttagagattcatccc-cccaaaccccatggtgaaagtcttat  
cc-caatggttagagatggggcctgatgaaaggtgtttgggtcatgagggtggattccccatgaatag----atgccct  
ctctggggaagggagagtgatgagctcttgcctctgtaatt-----cccacaagagctgggtggt-----aaaaag  
agcctgg----cacctcc----ctcctttcccttgccttc--tctctctcacttcccctcttaccatgtgatctctgc  
acatgctgattccccttccctcttctgacatgagtggaacag-ttgacaccctcac----ggcagatgctggcaccat  
gcttctgtacagcctgcagaactgtgagccaaataaacctcttttatttataaattaccagcctcaagtattcctt  
tatatcaacacaaaatggactaagaca---AAATC---CTTCCTCATTTTGAGGTCACATAAATGTAATAAATTTTG  
AGTAGGTTCT-----TAGAATTACAAATAT-----ATTGTATACAA  
AGGCAGAACTTTCCATATTTTCAGT---TGGCCAGTTCATTGCCATCCAAGCTGTGACAGTGTGAGAAGGAAAATAG  
GAATGCTTTTATT
```

>Orangutan

```
CCTCCTCCCTCATAGCCTCTTTCTGAAGAGCATTCCCTCAATAAATAATGGCACCTGAAT-CCTTGTCTCAGGTTCTG  
CTCCTGAAAGTCCAACATAAAACAGTGTACCTCCAGGTTAGGCTATTGTCTCAAAACCT-GAATTATTTTGGCTTAAT  
TTAGATTGTATTGGAAT---AAATG---tgctatagtttagagattcatccc-cccaaaccccatggtgaaagtcttat  
cc-cagtgtgaaagatggggcctgatgaaaggtgtttgggtcatgagggtggataccccacgaatag----atgccct  
ctctggggaagggagagtgatgagctcttgcctctattaatt-----cccacaaaagctgggtggt-----aaaaag  
agcctgg----cacctcc----ctcctttcccttgccttc--tctctctcacttcccctcttaccatgtgatctctgc  
acacgctgattccccttccctcttctgcatgagtggaacag-ttgaggccctcac----agcagatgctggcaccat  
gcttctgtacagcctgcagaactgtgagccaaataaacctcttttatttataaattaccagcctcaagtattcctt  
tatatcaacacaaaatggactaagaca---AAATC---CTTCCTCATTTTGAGGTCACATAAATGTAATAAATTTTG  
AGTAGGTTCT-----TAGAATTACAAATAT-----ATTGTATACAA  
AGGCAGAACTTTCCATATTTTCAGT---TAGCCAGTTCATTGCCATCCAAGCTGTGACAGTGTGAGAAGGAAAATAG  
GAATGCTTTTATT
```

>Baboon

















caccgtgagtggaagcagcttatgaccttcactag- agcagatgctggcaccatgcttcttgaacaacctgcagaacc  
atgagccaaataaacctcttttctttgtaaattacctagcctcagatattcctttatagcaacacaaaatggactaag  
aca---AAGCT-----TCTATTCAAACCCAGAT-AGGCTCCTTGTTGTTTGAAGAATAAGAAGTACAGAACAACA  
GCACAGCTGTAGGAATAAACCCATATAATTCAGT-GGGCATCCAGTTTCTATTTAC-----AA-GGAACAGG-TACA  
GTTTCATCTTTTTATTTTCTA-TTTTTATATTCATGTGAAACGA

>Rhesus

TA----TTTGTGATGCAAATTTTATGGAGGTCAACCAAGGGCACAGT-----TCGCTATTAGGTACCTTGCA  
ACTCAGGATAAAGGGAAAATAGGATGCAGGG-----TGGAACAGAAAATGGAATGGTAAAGCAGAAGAAAATGCCCT  
AA-----CTGGAATAA---AGACT---tcatatagtttggtatggttcttcccccttaaattctcatgttgaaa-ttgat  
tcccattggtggaggtagggcctaataggtaggtggttgggcccagagaggg---ttgggctccctcatgaatggag  
tagtgcccaccggcctgggagagaggtgtgaattctccctctgttagttcctgagagagctgggtattgaaaagag  
tctg-cacctccttctct---cttgcctcctctcttggccatgggggtgctgacatgctggctcccccttcaccttc  
caccgtgagtggaagcagcttatgaccttcactag- agcagatgctggcaccatgcttcttgaacaacctgcagaacc  
atgagccaaataaacctcttttctttgtaaattacctagcctcagatattcctttatagcaacacaaaatggactaag  
aca---AAGCT-----TCTATTCAAACCCAGAT-AGGCTCCTTGTTGTTTGAAGAATAAGAAGTACAGAACAACA  
GCACAGCTGTACGAATAAACCCATATAATTCAGT-GGGCATCCAGTTTCTATTTAC-----AA-GGAACAGG-TACA  
GTTTCATCTTTTTATTTTCTA-TT-----ATGTGAAAAGA

>Marmoset

TA----TTGGTGATACAAGTTTTATAGAGGTCAACGAAGGACACAGT-----TAGCTATTAGGTACCTTACA  
ATGCAGGATAAAGGGAAAATACAATCCAGAG-----TGGAATAAGAAAATGAAATGGTAAACAGAAAGAAAATGTCTT  
AA-----CTGGAATAA---AGACT---tgatatagtttggtatggttcatcccccttgaatttttatgttgaaa-ttgat  
tgccagtggtggaggttagggcctaataggtaggtggttgggtcatggcagaggggtcatggggatccccacgaa-----  
tagtgcccaccactgtgggagaggggtgtgaattctccctctgttagttcctgaaagatctgggtattgaacagac  
tctacacctcctt-----gtctcttgcctatgggatctctgacatgctggctcccccttcccccttc  
caccatgagtagaagtagcctgtgaccttcactagaagcagatgctggaacctatgctccccgaacagtctgcagaacc  
atgagccaaataaacctcttttctttataaaattacctagcctcagatattactttatagcaacacaaaatggactaag  
aca---AAGCT-----TCTATTCAAACCCAAATATAGGGTCTTGTTGTTTGAAGAATAAGAAGTACAGAACAACA  
GCACGGATATAGAAATACACCCATATAAATCACT-GGGCATC-----ATATTTAC-----AA-GGAACAGG-TACA  
ATTTATCTTTTTATTTTCTA-TTTTTATATTCATGAGAAAAGA

>Tarsier

TC----TTTTTTATGCCA-----AGTTCAACCAAGGGCATATTCAACTTACTGTATCTATTAGGTACCTTGCC  
GTGCAG-----GAGAATAGGATCAGGGGACAAAAAAAAAAGAAAATGGAAAGGTAAAGCAGAAGAAAATACCTT  
AA-----CGGGAATAA---AGCCT---tgatgaagggtgg-----gtcttctccaaatctcatgttgaaatttgat  
catcagtggtggaggtggggcctaataggtaggtggttagcc-----t---gatccctcccaataaat  
ggattccc-----tggaaggtgggggggg-----  
-----tgggggggggtggtggtgcccagctccggt---cttc  
ctccatgagaggaaacagcctgaggccctcactggaagcagatgctagctccatagcactt-----ttgcagaaca  
gtgagcaaaataaacctcttttctttataagttaccagacgcaggtattcctttatagaaacacaaaacggactaag  
atg---AGGCT-----TCGATTCAAACCCAAGC-AGGGCCCTTGTCCTTTGAAGGATAGGGGTACAAAACAA-A  
GCAAGGCATTAGGAATAAACCCACCTGAATCGCTGGGGCATCCAGTTTCTATTTAC-----AAGGGAATAGC-TACA  
GTTAATCTT-----TTTTTATATTCATGAGAAAAA

>Bushbaby

TC----ATTCTGATTCAAGTTTTATAGAGGC-----GCTTGCCGTAGCTATTGAGTCACCTTCCA  
AGGCAGAGTAAATGAAAATAGGATCAAAGG-----TCAAAAAGAAAATGGAATGGTAAAGCAGAAGAAAATGTCTT  
AA-----CTAGAATGA-----  
-----  
-----  
-----  
-----  
-----  
-----  
-----  
-----AGGCT---CGCTTCTATTTAAACCCAAGCAAAAATGCTTGTCTTTTGGAGGGTGG-----  
-----TAGGAATATAACCCACATAAATCACTGGGGCGTCCAGTTTCTATTTATTTACAAG-GAAAAAACTGCA  
GCTTATTTTTTTTTCTA-TTTTTATATTCCTAAGAAAAA-

>Mouse\_lemur

TC----ATTTTGATACAAGTTCTATAGAGGTCAACCAAGGGCACAGTCAGCTTGCCATAGCTATTAGGTACCTTGCA  
CTGCAGGGTCAGTGAAAAT--GATCAGGGG-----TCAAAAAGAAAATGTAATGGTAAACAGAAAGAAAATGTCTT  
AA-----TTGGAATAC-----

```

-----
-----
-----
-----
-----AGGCT-----TCAATTCAAACCCACGC-AGAGTACTTGTCTTTGAAGGATAGTAGGTGCAAAACAATA
GCAAAGCAATAGGAGTAAAACCCACATAAATCACTGCGATATCCAGTTTCTATCTAC-----AA-GGAAAAAGCTACA
GTTTCATCTTTTATTTTCTA-TTTTTATATTAATGGGGAAAAAC
>Tree_shrew
CC----TTTTTGATACAAGTTTTCATGAAGGTCAACTGAGAACATAGC----TTGCTACAGCTAT--GGTCACCTTACA
GAG-AGGGTCAAGGAGACATAGGATTAAGGG-----CAGAAAAGGAAAGTGAATAGTAAAAGAGAAGAAAATGGCTT
CTTCTGAACTGGAATA-----
-----
-----
-----
-----AGGCT-----TCTATTCAAATCCAAGG-----TCCTTG-----GAGGCACAGAACAGTA
GCGAGACAATGGAAATAAAACCCACATAAATCACT-GTA--ATAGTTTCTATTAG-----AAGGGAAAAAA-ACCA
GTTTCATCTTTAATTTTCTATTTTTTGTATTCATGAGAAAAAA
>Guinea_pig
CT----TCTTTAGTACAAATTTAATTAAGGTCAAGGGCATGGTCAGCCTGCTGCAGCTATTAGGTCACTCTCACA
AAGGAAGGTCAAGGGGAAGCAGAATCAAGGG-----CCAAAAAAAAA-AAAGAATGAAAAAACAGAAGAAAATATGTT
AA-----CTGGAATAA-----
-----
-----
-----
-----AGGCT-----TCTGTACCAAACCCATGC-A-GGTCCTGGTCTTCTAGG-ATTCAAAGTATAAAACAATA
GCAAATAACAGGAATAAGAGCCACACAGATCGCTGGGGAGAGTAG-----ATC-----CA
GGTCATCCTTTGTTTTT-C-A-TTCCTGTGTTTCATGAGAAGCAA
>Dog
TCTTTTTTTTTTGGAACGGGTTTTATAAGGGCAACCCAAGGGTACAGCCAGCTTGCTCTAGCAGTTAGGTGCTCAACA
ATTGAGGGTCAAGGGAAAATAGGGTCGGAGG-C---CCAAAAATAAAACAGACTGGTTA---GAGATAAAAC-----
AA-----CTGGAATAA-----
-----
-----
-----
-----AGACT-----TCTTTTCAAATGCAAGC-AGAATCCTTGCCCTTGAAGAACAGAAGGTACAAAACAATG
GCAAGACAACAGGAATAAAAGCCACAT-AATCATTGGGCTATTAGTTTCTCTTTAC-----AA-GGAAGAAGCTCCA
GTTTCATCCTTTATTTTCT---TGTTTATATTCATGAGCAAAAC

```



## Marker M40

>MSTB

```
-----  
-----tgatatggtttggatggtttgtccctccaaat  
ctcatggtgaaatgtgatccccagtggtggaggtggggcctgggtgggaggtggtttggatcatgggggaggatccctca  
tgaatggcttggcgccatcccc-ttgggtgatgagtgagttctcgctctggttag-----  
-----ttcacgcgagatctggttgtttaaaagagntnggcacctccccctct----ctctcttgctcc  
cgctctcgccatgtgacgtgctgct-----cccccttgcg-----ttctgcatgattgnaagctt  
cctgaggcctcaccagaagccgagcagatgcccggcgccatgcttctctgtacagcctgcagaaccgtgagccaattaa  
cctcttttctttataaaattaccagcctcaggtatttctttatagcaacgcaagaacggactaacaca-----  
-----
```

>Human

```
AGAACAT--TTTCTCTTAAGTTCAGTATAG-CTATACAACCTGCTTTCTATAATGATTTAATTTTTTCCACTACTTTAC  
AAAATGCTTATTAGACATATAAA-GGGATAATTGG---TAGGT---aaatatagtctgcatatattgtctc-tccaaat  
ctcatggtgaaatgtgattgccagtggttagaggcagggcctactgggaggtatttgggtcatgggggagatccctca  
tgaagacttgggtgccc-----atggtaatgagtgagttctg-ctctggttg-----tttct-  
-----agagcgttgggttgttggaaagagtctggcac-ctccctgctc-----ttctccttccat  
ccctctctccccacatggtgctgctg-----tccccattgccatgaggggtatatattctgcatgagtgatgctt  
cctgaggcccccacaccaga----tgcagatggttggtaaccatccttcttctgtacggccttcagaactgtaagccacataaa  
cctcttttctttataaaatttctggtctcaagcattcctttattgcaa--cacaaatggactaagaca---GTAGG--  
-CAATTGGACAGAGGAGTCTGGG-TTCAGGGAAGCGGTTTAAGCTAGAGTTATCAAGATTATAGTTGCATGAAATTTT  
GTGATATTGCATGTGATCATGGTAGAAATGAGTGTGTA-
```

>Chimp

```
AGAACAT--TTTCTCTTAAGTTCAGTATAG-CTATACAACCTGCTTTCTATAATGATTTAATTTTTTCCACTACTTTAC  
AAAATGCTTATTAGACATATAAA-GGGATAATTGG---TAGGT---aaatatagtctgcatatattgtctc-tccaaat  
ctcatggtgaaatgtgattgccagtggttagaggcagggcctactgggaggtatttgggtcatgggggagatccctca  
tgaagacttgggtgccc-----atggtaatgagtgagttctg-ctctggttg-----tttct-  
-----agagcgttgggttgttggaaagagtctggcac-ctccctgctc-----ttctccttccat  
ccctctctccccacatggtgctgctg-----tccccattgccatgaggggtatatattctgcatgagtgatgctt  
cctgaggcccccacaccaga----tgcagatggttggtaaccatccttcttctgtacggccttcagaactgtaagccacataaa  
cctcttttctttataaaatttctggtctcaagcattcctttattgcaa--cacaaatggactaagaca---GTAGG--  
-CAATTGGACAGAGGAGTCTGGG-TTCAGGGAAGCGGTTTAAGCTAGAGTTATCAAGATTATAGTTGCATGAAATTTT  
GTGATATTGCATGTGGTCATGGTAGAAATGAGTGTGTA
```

>Orangutan

```
AGAACAT--TTTCTCTTAAGTTCAGTATAG-CTATACAACCTGCTTTCTATAATGATTTAATTTTTTCCACTACTTTAC  
AAGATGCTTATTAGACATATAAA-GGGATACTTGG---TAGGT---aaatatagtttggatatttgtctc-tccaaat  
ctcatggtgaaatgtgattgccagtggttagaggtagggcctactgggaggtatttgggtcatgggggagatccctca  
tgaagacttgggtgccc-----atggtaatgagtgagttctg-ctctggttag-----tttct-  
-----agagagttgattggttggaaagagtctggcac-ctccctgctc-----ttctccttccat  
ccctctctccccacgtggtgctgctg-----tccccattgccatgaggggtatacattctgcatgagtgatgctt  
cctgaggcccccacaccgga----tgcagatggttggtaaccatccttcttctgtacagccttcagaactgtaagccaaataaa  
cctcttttctttataaaatttctggtctcaagcattcctttattgtaa--cataaacggactaagaca---GTAGG--  
-TAATTGGACAGAGGAGTCTGGG-TTCAGGGAAGCGGTTTAAGCTAGTGTATCAAGATTATAGTTGCATGAAATTTT  
GTGATATTGCATGTGATCATGGCAGAAATGAGTGTGTA
```

>Baboon

```
AGAACAT--TTTCTCTTAAGTTCAGTATAG-CTATACTACTGCTTTGTATAATGATTTAATTTTTTCCACTACTTTAC  
AAGACGCTTATTAGAGATATAAA-GGGATACCCAG---TAGGT---aaataactttggatatttgtccc-tctaaat  
ctcatggtgaaatgtgattgccagtggttggaggtagggcctactgggaggtatttgggtcatgggggagatccctca  
tgaagacttgggtgccc-----atggtaatgagtgagtttgg-ctctggttag-----tttct-  
-----ggagagttgattggttggaaagagtctggcac-ctccctctc-----ttctccttccat  
ccctctctccccatggtgctgctg-----tccccattgccatgaggggtatacattctgcatgagtgatgctt  
cctgaggccctcaccata----tgcagatggttggtaaccatccttcttctgtacagccttcagaactgtaagccaaataaa  
cctcttttctttataaaatataccaatctccagcattcctttattgcaa--cacaaacggactaagaca---GTAGG--  
-CAATTGGACAGAGGAGTCTGGGGTTTCAGGGAAGTGGTTTAAGCTAGAGTTATCAAGATTATAGTTGCATGAAATTTT  
GTGACATTGCATGTGATCATTGTAGAAATGAGTATAG
```

>Rhesus

AGAACAT--TTTCTCTTAAGTTCAGTATAG-CTATACTACTGCTTTGTATAATGACTTATTTTTTCCACTACTTTAC  
AAGACGCTTATTAGAGATATAAA-GGGATACCCAG---TAGGT---aaatatagtttggatatttgtccc-tctaaat  
ctcatgttgaaatttgattgccagtggtggaggtagggcactactgggaggtatttgggtcatggggcagatccctca  
tgaaaaactttgtgcc-----atggtaatgagtgagtttg-ctctgtag-----tttct-  
-----ggagagttgattggtgaaaagagctctggcac-ctccctctc----ttctctttccat  
ccctctctccccatgtgatgcctgc-----tccccattgccattagggatatacattctgccatgagtatagctt  
cctgaggccctcaccata---tgcagatggttggtaccatccttcttgtacagctttcagaactgtaagccaaataaa  
cctctttctttataaaaatccaatctccagcattcctttattgcaa--caciaacggactaagaca---GTAGG--  
-CAATTGGACAGAGGAGTCTGGGGTTCAGGGAAAGTGGTTTTAAGCTAGAGTTATCGAGATTATAGTTGCATGAAATTTT  
ATGACATTGCATGTGATCATGGTAGAAATGAGTATAG

>Marmoset

AGAACAT--TTTCTCTTAAGTTCAGTATAG-CTATACAACCTGCTTTGTATAATGATTTTTATTTTTTCCACTACTTTAC  
AAGACGCCTATAAGACCTATGAA-GAGATA-CTGG---TAGGT---aagtagagtttgatattttccc-tccaaat  
ctcatgttgaaatttgactaccggtattggatgtagggcactactgggagatggttgatcgtggggcagattcctca  
tgaaagacttgggtgct-----atggtaatgagtgaggtctg-ctgtgtag-----tattct-  
-----agagagttgattggtgaaaagagctctggcac-ctccctctc----ttctctttccat  
ccctctctgaccggtgtgatgcctgt-----tccccattgccatgagtgtatagcttctgccatgagtgtatgctt  
cctgaggctgtgaaaaga---tgcagatggtgctaccatccttcttgcacagccttcagaactgtaagccaaataaa  
cctcttctctttataaaaatctctgtctcaagtattcctttattgcaa--caciaatggactaagaca---GTAGG--  
-CAATTGGACAGAGGAGTTTGGGGTTCAGGGAAAGTGGTTTTAAGCTAGAGTTATCAAGATTATTTTTCCATGAAATTTT  
GTGATATTGCATGTGATCATGGTAGAAATGAGTGTGG

>Tarsier

GGAACAG--TTTCTCTTAAGTTCAGTATAA-CTGCA-AACTGCTTTGTATAATGACTTCATTTTTCTC-ATTACTTTAT  
GAGATGCCTATTAGTCATACAAATGCGATATTTGG---CAGGT---ga-tatagtttggatatttgtccc-tccaaat  
ctcttctgaaatttgatccccaaagttagaggttggcctagagggaggggcttgggtcatggggcagactcctca  
aaagtggcttggggacttttctgatggtaatgagtgaaattccttcttggtagattgtgagatcactgatttttct  
ttatcctatttacaataagacagagctgattggt-gaaaaagcctggcactctccctctccttcttcttctgcttct  
ctctcttggcacatgtaattctctgcatatggttggtccacttcc-----ccttctgccatgagtggagttt  
cctgaagccctcac-aga---tgcagatgccaattccatgctaattgtacagtttgcagaactacgagtcagtaaa  
cctattttctttataaattaccagtgctgggtacttctttatagtag--caciaatgaactaagata---GTAGA--  
-CAACTGGACAGAGGTGTCTGGAGTTCAGGAAAGTAGTTTAGGCTAGAACTACCAAGCTTATAGTTGCATATAATTTT  
ATGACACTGTGTAAGATCATGGGAGAAATGAGCATAG

>Bushbaby

AGAACACAGTGTCTC--AAGGTCAGTATAA-CTATACAACCTGCTTTGTGCAATGACTTAATTTTTCTTACGGCTTTAT  
GAGATACCTATGAGCC-----ATGCCAGGGA-----  
-----  
-----  
-----  
-----  
-----  
-----  
-----  
-----  
-----  
-----CAGTT--  
-CAGCTGGACAGAGGAGTCTAAAGTTCAGGGAAATGGTTTTAGGTGAGAGCT-----AGTT-CACACAGTTTTC  
ATGGTATTGTGTGAGATGGAGGGAGACATGAACGTAG

>Mouse\_lemur

AGAACACAGTTACTCCTAAGTCCAGTATAAACTATAACAACCTGTTTTGTGTAATGAATTAATTTTTTCCACTACTTTAT  
GAGATGCCTATTGGCCATGTAAA-AGGGATGGTTG-----  
-----  
-----  
-----  
-----  
-----  
-----  
-----  
-----  
-----  
-----GTAGT--  
-CAACTGGACAGAGGAGTCTGAAGTTCAGGGAAAGTGGTTTTAGGCTAGAGTTTATAAGCCTATAGTTGCACACAATTTT  
ATGATATTGTGTGAGATCATGGGAGAAATGGATGTAA

>Dog

ACAACACAGTTT---TTAAGTTCAATATAA-CTACACAAGTCTTTGTGTAATGATTTCTTTCTTCCCACTATTTTAT  
GAGATGTCTATTAGCCACACAAA-GGGCATGGTTG-----

-----  
-----  
-----  
-----

-----GTAGG--  
-CAACTGGAAAGAGAAGTCCAGAGTTCTGGGAAGTGATTTAGACTAGAAATATTAAGCTTACAGTTGAACACTATTTT  
GTGCTATTTTGTGAGATAATGGGAAGAATGAAGATAG

>Horse

AGAACATAGTTTCTCTTAAGT----ATAA-TTACACAAGTCTTTGTGTAATAACTTTCATTTTTCCCACTACTTTTAT  
GAGCTCACTATTAGCCACACAAA-GGGCATAACTG-----

-----  
-----  
-----  
-----

-----GTAGG--  
-CAGTTGGACAGAGGAGTCCAGAGTTTCCAGGAATGTGGTTGAGGCTGGAGCTATCAAGCTTATATCTGAACACAATTTT  
GTGATATTTTGTGAGATCATGGGAGGAATGAGAGTA-

## Marker M42

>MSTB1

```
-----  
-----  
-----tgctatagtttgggatgtttgtccctccaaacctcatggtgaaatttgatccccagtggt  
tggaggtggggcctaattgggaggtgtttgggtcatggggcggtatccctcatgaatagattaatgccctccctcgggg  
tggggatgagtgagttctcactctattagttcccgcgagagctggttgtaaaaagagcctggcacctccctcctctc  
tctcttgcttccctctctcgccatgtgatctctgcacacgccggctccccctcacctccgccatgagtggaagcagcc  
tgaggccctcaccagaagcagatgctggcgccatgcttctgtacagcctgcagaacctgagccaaataaacctctt  
ttctttataaattaccagcctcaggtattcctttatagcaacacaaaatggactaagaca-----  
-----
```

>Human

```
CCTTGTTACAAGATAGCAATGTCAGGAGGGAATGAGACACAGAGAAGGTAAATTTTTATTGGGG-----GGTAGAAA  
TTCAGAGTAA--GTCTGAACCAAGGGGAGATATACATAGTCAAATTGGATAGCCCATATATTCTGTATACTTAAGATG  
GAGTAA-G---GTCAG---tgacatagtttgggatgtttgtcctctccaaatctcatggtgaaatttgggtccccattt  
tgtaattggagctctagtgggaggtgtttgggttatgggacagattcttcatgaatggcttattgctgcactt-----  
--gtaatgaatgagctcttgctcttttagttcccaccagaattgattggtgaaaagaggctggcacctccctccc-a  
tctcttgcccccttttgcaccctgtgac-----acgtcggctcccccttgccttctgccatgagtggaagcatct  
tgaggccctcaacagaagcagatgctgacatcatgcttcttgtacagcctgcagaactatgggccaataaacctctt  
ttctttataaattaccacacctcaagtattcctttatagcaatac--aatgaactaagca---GTCAG-----TGTG  
CGTCAAAA-AAA-----TTGATGAGAAA-----TATTGGATCTCCCAT--GGTAAGCTCAC  
CACATAGGGCAT-----GTGGACTCACAGACA
```

>Chimp

```
CCTTGTTACAAGATAGCAATGTCAGGAGGGAATGAGACACAGAGAAGGTAAATTTTTATTGGGG-----GGTAGAAA  
TTCAGAGTAA--GTCTGAACCAAGGGGAGATATACATAGTCAAATTGGATAGCCCATATATTCTGTATACTTAAGATG  
GAGTAA-G---GTCAG---tgacatagtttgggatgtttgtcctctccaaatctcatggtgaaatttgggtccccattt  
tgtaattggagctctagtgggaggtgtttgggttatgggacagattcttcatgaatggcttattgctgcactt-----g  
tggaatgaatgagctcttgctcttttagttcccaccagaattgattggtgaaaagaggctggcacctccctccc-g  
tctcttgcccccttttgcaccctgtgac-----acgtcggctcccccttgccttctgccatgagtggaagcatct  
tgaggccctcaacagaagcagatgctgacatcatgcttcttgtacagcctgcagaactatgggccaataaacctctt  
ttctttataaattaccacacctcaagtattcctttatagcaatac--aatgaactaaggca---GTCAG-----TGTG  
CGTCAAAA-AAA-----TTGATGAGAAA-----TATTGGATCTCCCAT--GGTAAGCTCAC  
CACATAGGGCAT-----GTGGACTCACAGACA
```

>Orangutan

```
CCTTGTTACAAGATAGCAATGTCAGGAGGGAATGAGACACAGAGAAGGTAAATTTTTATTGGAG-----TGGTAGAAA  
TTCAGAGTAA--GTCTGAACCAAGGGGAGATATACATAGTCAAATTGGATAGCCCATATATTCTGTATACTTAAGATG  
GAGTAA-G---GTCAG---tgacatagtttgggatgtttgtcctctccaaatctcatggtgaaatttgggtccctcattt  
tgtaattggagctctggtgggaggtgtttgggttatgggacagattcttcatgaatggcttattgctgcactt-----g  
tggaatgaatgagctcttgctcttttagttcccaccagaattgattggtgaaaagaggctggcacctccctccc-t  
tctcttgctcctctttcaccctgtgac-----acgtcggctcccccttgccttctgccatgagtggaagcatct  
tgaggccctcaacagaagcagatgctgacaacatgcttcttgtacagcctgcagaactatgggccaataaacctctt  
ttctttataaattaccacacctcaagtattcctttatagcaatac--aatgaactaaggca---GCCAG-----TGTG  
CGTCAAAA-AAA-----TTGATGAGAAA-----TATTGGATCTCCCAT--GGTAAGCTCAC  
CACATAGGGCAT-----GTGGACTCACAGACA
```

>Baboon

```
CCTTGTTATAAGATAGCAATGTCAGGAGGGAATGAGACACAGAGAAGGTAAATTTTTGATTGGGG-----GTAGAAA  
TTCAGAATAA--GTCCAAACCAAGGGGAGATATACATAGTCAAATTGGATAGCCCATATATTCTGTATACTTAAGACA  
GAGTAA-G---GTCAG---tgacatagtttgtatgtttgtactctccaaatctcacggtgaaatttgggtccccattt  
tgggaattggagctctggtgggaggtgttttgtcatgggacagattcttcatgaatggcttgggtgctgcactt-----g  
tggaatgaatgagctcttgctcttttagttcccaccagaactgattggtgaaaagagcctggcacaaccctccctc  
tctcttgctcctctttcaccctgtaac-----acctcggctcccccttgccttctgccatgagtggaagcatct  
tgaggccctcaacagaagcagttgctgacatcatgcttcttgtacagcctgcagaactatgggccaataaacctctt  
ttctttataaattactcagcctcaagtattcctttatagcagtaac--aatgaactaaggca---GTCAG-----TGTG  
CGTCAAAAGCAA-----TTGATGAGAAA-----TATTGGATCTCCCAT--GGTAAGCTCAC  
CACATGGGGCAT-----GTGGGACTCACAGACA
```

>Rhesus

CCTTGTTATAAGATAGCAATGTCAGGAGGAATGAGACACAGAGAAGGTAAATTTTGATTTGGGG-----GTAGAAA  
TTCAGAATAA--GTCCAAACCAAGGGGAGATATACATAGTCAAATTTGGATAGCCCATATATTCTGTATACTTAAGACA  
GAGTAA-G---GTCAG---tgacatagtttgcagtttgcctctccaaatctcacgttgaaatttgggtccccattt  
tgggaattggagctctggtgggaggtgtttgggtcatgggacagattcctcatgaatggcttgggtgctgcaactt---g  
tggaatgaatgagctcttgcctcttttagttcccaccagaactgattggtgaaaagagcctggcacctccctcccctc  
tctcttgcctccctctttcaccctgtaac-----acctcggctccccttgccttctgccatgagtggaagcatct  
tgaggccctcaacagaagcagttgctgacatcatgcttcttgtacagcctgcagaactatgggccaataaaccactt  
ttctttataaattactcagcctcaagtattcttttatagcagtac-aaatgaactaaggca---GTCAG-----TGTG  
CGTCAAAGCAAA-----TTGATGAGAAA-----TATTGGATCTCCCAC-GGTAAGCTCAC  
CACATGGGGCAT-----GTGGGCACTCAGAGACA

>Marmoset

CCTTGTTACAAGATAGCAATGTCAGGAAGGAATGAGACACAGAGAAGGTAAATTTTGATTTGGGG-----GTTAGAAA  
TTCAGAATCA--GTCCTAATCATGCGGAAATGTTTCGTAGTCAAATTTGGATAGCCCATATATTCTGTATACTGAAGATG  
GAGTAA-G---GTCGG---tggtatcgtttgtacatttctcctctccaaatctcatggtgaaatttgggtc-cccattt  
tgggaagtggggcctggtgggagatgtttgggtcgtgggacagattcctcatgaatggcttgggtgctgctcctt---g  
tggccataaatgagctcttgcctcttttcgttccaccagaactgattggtgaaaagaacctggccccctccctcccctc  
tctcttgcctccctcttgcaccctgtgac-----accggcctccccttggtttctgccatgagtgaaagcatct  
tgaggccttcaacaggagcagatgctgatggtgcttcttatacagcctgcagaactatgagccaaataaacttctt  
ttctttataaattaccagccacaagtagtcttttatagcaatac-aaa---ctaaggca---GTCAG-----TGTA  
TGTCAAAA-GAA-----T-GAAGAGAAA-----TATTGGGTTTCCAAT-GGTAAGCACAC  
AACATAGGGCAT-----GTGAGCAC-----A

>Tarsier

TCTTGTCCTAGATACAATGCCAGGAGAGAATGAAAAACAGAGAATGCACATTTTTATTGGGG-----GTCAGAAA  
TTCAGAATAA--GTCCTAACCAAGGGGAGATATGCCTGGCCAAATTTGGATAGCCCATATAATTCTGTAT-----G  
GAGTAA-G---GTCAG---taatacagtttggatctctgtccccttccaaatctcatgctgaaatgagatcccggtgt  
tggaggtggggcctggtggaaggtgttt-----gggggtagatcccttataaatgtcttcacaccattctt---g  
tggaatgagtaagttcttgcctctattagttactgtgacagttgggtggtgaaaagagcctggcacctcccagcc--  
---cttacttctctcttgcacagtgaccttgcacacaccagctccacggtgcttccaccgagagtgaggagcagcc  
tgaaatcctcttcagaagcagatgctggttccatgcttcttgtacagcctgcagaactgtgagccaaacaca-----g  
ttctttataaacgacctagcctcgggtattcttttatagcaattc-aaacaaaca-----GTG  
TGTCAAAA--AAA-----TTGATAAGAAA-----TATTTGATCTCCCAC-GATAAGCTCAC  
CACACAGAGCATTGAGTGAGCATGTGAGCATTACAGACA

>Bushbaby

----ATCACTAGATTGCAACGTTAGGAAGGAATGAGATGCAGAGAAGGTAAAGTTTGGGTCTGGAG-----GGCTGAAA  
CTCACCATCA--GCCCTAA-CAAGGGGAG--ATCCTTGGCCAAATTTGGACAGCCCATATAATTCTGCATACTTAAATG  
GAGTAA-----  
-----  
-----  
-----  
-----GTCAG-----TATG  
TGTCAAAA-AAA-----AAAAAAAATGGTGAGAAA-----TATTTGCTCTCCCCT-GGTAGGCTCAG  
CACACAAACCAC-----ATGAGCACTCACAGACG

>Mouse\_lemur

TCCTGTCCTAGATAGCAATGTCAGGAAGGAATGAGACACAGGAAGGTAAAGTTTGGATTAGCAG-----GGCAGAAA  
TTCAGAATTA--GTCCTAA-CGAGGGGAGGTATCGCTGGCCAAATTTGGACAGCCCGTAAATTTCTGCATACCTAAGATA  
GAGTAATA-----  
-----  
-----  
-----GTCAG-----TGTG  
TGTCAGAAA-AAA-----AAAAAGGGTTGAGGAA-----TACTTGATCTCCCAT-GATAGGCTCAC  
CACATAAGGCAG-----ATGAGCAAACACAGAC-



Marker M45

>MSTB1

-----  
-----  
-----tgctatag-----tttggatgtttgtcccctccaaacctcatggtgaaat  
ttgatccccagtggtggaggtggggcctaattgggaggtggttgggtcatggggcgatccctcatgaatagattaat  
gccctccctcggggggtgggatgagtgagttctcactctattagttcccgcgagag-----ctggttgtaa  
aaagagcctggcacctccctcctctctctctt--gcttctctctcgcctatgtgatctctgcacacgccggctccct  
tcaccttccgcatgagtggaagcagcctgaggccctcaccagaagcagatgctggcgccatgcttcttgtagcct  
gcagaaccgtgagcca-aataaacctcttttctttataaattaccagcctcaggtattcctttatagcaacacaaa  
tggactaagaca-----  
-----

>Human

TGAAGTCAAAGATTTAAGGTCCACAGACTCTGGACCCCATCCCCTTAGCCTCTGTGCTTTCTGCCTCCATCAGTGAGT  
TCCAAGCCTAAGTGTGAGAGATCTCTAGGAGCAGAGGTCTCAGGGATATCTATTAGAATATTCTACAGTG---TATTG  
AAAACATAGGTATCC---AGGTC---tgctgtgg-----atatggtttatttgtcccaccaagtctcaggtagaat  
gtggt-cccattggtggaggt-gggcctggtaggaggtgttagggtcat-ggggtggatccctcatgaatggcttgggt  
g-----catcctggtggtaatgagagagttttactcagcaaattcccagatgagagtttctcaagagctggttattaa  
aaagagcctggcacctcctccctttctctctc--actttctctctcaccacttgatctctgcacacacaggctccct  
tcaccttctgcatgagtggaagcagcctgaggccctcaccagaagcagatgctgggtgcatgcttcttgtaggctc  
gcagaactgtaagccaaaataaacctcttttctttataaattaccagccttacgtattcctttatagcaacacaa-a  
tggactaataca---GGGCC---CAACCTAAAAACGCAGA-GCTGCAGGCC-----  
--TGAGTAATTCCTGCCTAGCCACACTCAGGAACCTTTGGCCTACAGACCACCTCTGTAGCAGGCACCTGC---TT  
TTCACCAGGCCCATAGTAATTTCTGATTAGGGAGTGGGCAGATTACAATTTGAGAGAAACAGAGGCTCAGAAGGACC  
TGAAGGTCGTTCCAGC

>Chimp

TGAAGTCAAAGATTTAAGGTCCACAGACTCTGGACCCCATCCCCTTAGCCTCTATGCTTTCTGCTTCCATCAGTGGGT  
TCCAAGCCTAAGTGTGAGAGATCTCTAGGAGCAGAGGTCTCAGGGATATCTATTAGAATATTCTACAGTG---TATTG  
AAAACACAGGTATCC---AGGTC---tgctgtgg-----atatggtttatttgtcccaccaagtctcatggtagaat  
gtggt-cccattggtggaggt-gggcctggtaggaggtgttagggtcac-ggggtggatccctcatgaatggcttgggt  
g-----catcctggtggtaatgagagagttttactcagcaaattcccagatgagagtttctcaagagctggttattaa  
aaagagcctggcacctcctccctttctctctc--actttctctctcaccacttgatctctgcacatacaggctccct  
tcaccttctgcatgagtggaagcagcctgaggccctcaccagaagcagatgctgggtgcatgcttcttgtaggctc  
gcagaactgtaagccaaaataaacctcttttctttataaattaccagccttacgtattcctttatagcaacacaa-a  
tggactaataca---GGGCC---CAACCTAAAAGACGCAGA-GCTGCAGGCC-----  
--TGAGTAATTCCTGCCTAGCCACACTCAGGAATTTTGGCCTGCAGACCACCTCTGTAGCAGGCACCTGC---TT  
TTCACCAGGCCCATAGTAATTTCTGATTAGGGAGTGGGCAGATTACAATTTGAGAGAAACAGAGGCTCAGAAGGACGC  
TGAAGGTCATTCCAGC

>Orangutan

TGAAGTCAAAGATTTAAGGTCCACAGACTCTGGACCCCATCCCCTTAGCCTCTATGCTTTCTGCCTCCATCAGTGAGT  
TCTAAGCCTAAGTGTGAGAGATCTCTAGGAACAGAGGTCTCAGGGATATCTATTAGAATATTCTACAGTG---TATTG  
AAAACACGGGTATCC---AGGTC---tgctgtgg-----atatggtttatttgtcccaccaagtctcatggtagaat  
gtggt-cccattggttaggt-gggcctggtaggaggtgttagggtcat-ggggtggatccctcatgaatggcttgggt  
g-----catgctggttagtaatgagagagttttactcagcaaattcccagatgacagtttctcaagagctggttattaa  
aaagagcctggcacctcctccctttctctctc--acttctctctcaccacttgatctctgcacacacaggctccct  
tcactttctgcccagagtggaagcagcctgaggccctcaccagaagcagatgctgggtgcatgcttcttgtaggctc  
gcagaaccgtgagccaaaataaacctcttttctttataaattaccagccttatgtattcctttatagcaacacaa-a  
tggactaataca---GGGCC---CAGCCTAAAAACCCGGA-GCTGCAGGCCTGAGTGTCTGCACTGTTATCAAGGCC  
CATGAGTAATTCCTGCCTAGCCACACTCAGGAACCTCTGGCCTGCAGACCACCTCTGCAGCAGGCACCTGC---TT  
TTCACCAGGCCCCAGTAATTTCTGATTAGGGAGTGGGCAGATTACAATTTGAGAGAAACAGAGGCTCAGAAGGACC  
TGAAGGTTGTTCCAGC

>Baboon

TGGAGTCAAAGATTTAAGGTCCACAGACTTTGGACCCCATCCCCTCAGCCTCTATGCTTTCTGCCTCCATCAGTGAGT  
TCCAAGCCTAAGTGTGAGAGATCTCTAGGAGCAGAGGTCTCAGGGATATCTACTAGAATATTCTACAGTG---TATTG

AAAACATGGGTATCC---AGGTC---tgctgtgg-----atatggtttacctgtcccagcaagtctcatggtagaat  
gtggt-cccagtggtggaggt-gggcctggttaggaggtggttagggtcat-ggggtggatccctcatgaatggcttggt  
g-----catcctggtggtaatgagagag-ttttactcggcaaattcccagacagtttccctcaagagctggttattaa  
aaaaagcctggcacctcctccctctctctctcacttcctgtctcaccacttgatctccgcacacacaggctccccg  
tctccttctgccacaagtggaagcagcctgaggccctcaccagaagcagatgctggcgccatgcttccctgtatggctc  
gcagaactgtgagccaaaataaaaactcttttctttataaagcaccagccttatgtattcctttatagcaacacaa-a  
tggactcataca---GGGCC---CAACCTAAAAAACCCAGA-TCTGCAGGCCTGAGTGTCTGCACTGTTGTCAAGGCC  
CATGAGTAATTCCTGCCAGCCACACTCAGGAACCTTTGGCCTGCAGACCGCACTCTGCAGCAGGCACCTGC----TT  
TTCACCGGGACCCTAGTAATTCGATTACAGGGAGTGGGCACATTACAGTTTGAGAGAAACGCAGGCTCAGAAGGACC  
TGAAGGTCCTTCCAGC

>Rhesus

TAGAGTCAAAGATTCAAGGTCCACAGACTTTGGACCCCATCCCCTTAGCCTCTATGCTTTCTGCCTCCATCAGTGAGT  
TCCAGGCCTAAGTGTGAGAGATCTCTAGGAGCAGAGGTCTCAGGGATATCTACTAGAATATTCTACAGTG---TATTG  
AAAACATGGCTATCC---AGGTC---tgctgtgg-----atatggtttacctgtcccagcaagtctcatggtagaat  
gtgat-cccagtggtggaggt-gggcctggttaggaggtggttagggtcat-ggggtggatccctcatgaatggcttggt  
g-----catcctggtggtaatgagagag-ttttactcagcaaattcccgtgagagcttccctcaagagctggttattaa  
aaaaagcctggcacctcctccctctctctctc--acttctctgtctcaccacttgatctccgctcatacaggctccccg  
tctccttctgccacagagtggaagcagcctgaggccctcaccagaagcagatgctggcgccatgcttccctgtatggctc  
gcagaactgtgagccaaaataaaaactcttttctttataaagcaccagccttatgtattcctttatagcaacacaa-a  
tggactcataca---GGGCC---CAACTTTAAAAAACCCAGA-TCTGCAGGCCTGAGTGTCTGCACTGTTATCAAGGCC  
CATGAGTAATTCCTGCCAGCCACACTCAGGAACCTTTGGCCTGCAGACCGCACTCTGCAGCAGGCACCTGC----TT  
TTCACGGGGACCCTAGTAATTCGATTACAGGGAGTGGGCAGATTACAGTTTGAGAGAAACGCAGGCTCAGAAGGACC  
TGGAGGTCCTTCCAGC

>Marmoset

TGGAGCCAAAGCTTTAAGGTCCACACACTGTGGACCTCATGCCCTTAAGTTCTATGCTGTCTGCCTCCATCGGTGTGT  
TCCAAGCCT--GTGTTTCGAGATCTCTAACAGCAGAGGTCCCAGGGCTATCTACTAGAATATTTCGACAGTG---TATTA  
AAAACACGGGTATCC---AGGTC---tgctgtgg-----atatggtttgcttggccctgccaagtctcatggcagaat  
gtggt-cccg-tgtagaggt--ggccttgttaggaggtggttaggatcgt-ggggtgaattcctcatgaatggcttggt  
g-----catcctggtggtaacgagagaggttttactcagcaaattcccagagaggttccctcaagagctggttcttaa  
aaagagcctagcatgtcttccctctctctctc--acttctctctcaccactcgatctctgcacacaccggctccct  
tcaccttctgccacaagtggaagcagcctggggccttcatcagaagcaggtaccagcgccatgcttcttctgcccagctc  
gcaaaagtgtgagcc-aaataaacctcttttctttataaattgccagccttgggtattctttatagcaaaaacaa-a  
tggactaata-a---AGGCC---CAAATAAAAAAACCCAGC-TCTGCAGGCCCGAGTGTCTGCACCGTTATCGAGGCC  
CGTGAGTAATTCCTGCCAGCCACACTCAGGAACCTCGGCCTGCAGACCACGCTCTGCAGCAGGCACCTGC----TC  
TTCACAGGCCCTTAGCAATTCGACTCAGGGAGTAGGCAGATTACAGTTTGAGAGAAACACAGGCTCAGAAGGACAC  
TGAAGGTCCTTCCAGC

>Tarsier

TGTGGTCAAAGATTTAAGGTCTATAGACTCT-----ATTCCCTTAACCTCTATGCTGTCTGTCTCCATCAGTGAGT  
TCTAAACTTAAGTGTGAGAGCTCTCTAAGATTGGAGGTCTGGAGCTGTCTATTAGAATATTCTAAAGAG---TACTA  
AAAATATAGATGTCT---AGGAC---cgctatggtttgtataggggtggtttggccttgccagctctcatggtgaaat  
ctgatccccagtggttggaggtggggcctggcaggaggtggttggataatgggggcaga---tcatgaatggcttggt  
ga-----ccttctagcaatgagtgagttcttctcagttaatccccgtgagagttcccttgagagctagttgtaaa  
aaagagcatggtagcttctgcctttctccctctggcttctctctctcctcctcagccatgtcatctc--cacaccaagct-ccct  
tcgcccgtccaccatgagtggaagcttccctgaggccctcacaaaagcagatgcctgtgcccgtggttcttctgtagagact  
gcagaactataagcc-aactaaagcacttttattataagttaccagctcaggcattcctttacagcaacataa-a  
aggacttatctg---GGGCC---CAACCTAAAA-----GG-ATTCTGGGGCTGAGAGTCTGTATTGT-----  
-----ATTTTCTACACGCTCA----CAGGAACCTCTGGCCTGGAGCCCACACTCCAAAACAGGGGCCTGC----TT  
TTCACAGGGCCCTGGGGAACCTCTGA-TCAGAGAGTGGGCAGATT-----GAGAAGCACTGGCTCAGAAGGACAC  
TGAAGGTTG-----

>Bushbaby

TGGGGCCAAAGACTTAAGGTC-----TGGCCCCTAGGCCCTTAATCTCTATGCTCCCGGCCTCCATCAGTGC-T  
TTCTACTGTACTTGTGAGAGATTTCTAGGATTGGAGGTCCCAGGGACATCTAACAGAGTATTCTACAGTA---TATTA  
GAGATGTAGATGTCT-----  
-----  
-----  
-----  
-----



```

-----
-----GGGTC---CAACCTAAAAGACCTGAT-GCTGCAGGCCTGAGTGTCCACGCCACGGACAAGTCT
CACGGGCAATTCTCTGCGCAGTCACTCAGGAACTGTGGCCTGGAG-CCACACACTGCTGTAGAAGCTTGCTTGCTT
TTCCCGAGGGCCTGAGCAATGCTGTTTCAGGGCACAGGCAGATTACAGCGT--GAGAAAGGCAGGCTC---AGGACAC
TGAA-GTCCTTCCATC
>Mouse_lemur
TGGGGC-----CCCATGGCT-----TGAAC-----TAACCTCTGTGCCGTCTGCCTCCAGCAGGGAGG
TGAAAACCTTAGGTGTCAGTGATCTCTAGGATTGGAGGTCCCAGAGGCATCGAATAGAATATTCCACAGTG---CATCA
GAAATATAGATGTCT-----
-----
-----
-----
-----
-----GGGGC---CAACCTAAAAGACCCGAT-GCTGTAGGCCTGCGTGTGTGCACCATGGACAAGTCC
TGCGGGTAAGTCCCTGCACAGCCACACTCAGGAGCT-----CACAGACTGCAGCAGGAACCTTGC-----T
GTCACAAGGCCCCGAGTGATGCTGTTT-----CAGGCAGATTACGGTTT--GAGAAACGCAGGCTCAGAAGGACAC
TGAAGGTCCTTCCATC
>Tree_shrew
TGAAGCTAAAGACTTACAGTTCACAGACTCTGGACCCCATCCCCTTTCACCTCTCTGCTACCTACCTCCATCAGTGACT
TCTAAATGCACGTGTTGGAGGT--GAGGATCTGAGGTCCCAGACCGCCCTAGTAGAATATCCAATGGGGTGTATTATA
ACAACACAGTGATCC-----
-----
-----
-----
-----AGGCC---CAACCTGAAAACCTCAGACTCTGCAGGCCTGAGCATCTGCCTTGCTAGCAAGTCC
TCTCTACAATTTCCCGCACGGCTACACCTAGGACCTCTGGCCTGGAACACATGCTCTGCAGCAGGAACCTGC----GT
TTTCTCAGCGCCCCAG---GCTGTCTCAGGGAGTGGCCAGATCACAGTGT--GAGAAACACAGGCTCAGAAAGACAC
CGAC-GTCCTTCCAGT
>Guinea_pig
-AAGGCCAAAGATTTGAGGGCCACAGGCTCTGGACCCCATTTCTTAACTTCCATG----CTGTCTCCCTCAATGAGA
TCTCAACTAGCAAGGCAGAGAGTCTTAGAATCAGCACTCCCAGAGCTAGGGATCAGGACATTCTACAAAGTG-CATTA
AAAGCACTGGTGTCC-----
-----
-----
-----
-----TGGCC---AATCTAGGGGACTCAGACACTGCAAGCCTGAG-----
CATCTGCATCAACCCCACTGGTCAACCTTGCAAAGCTCAAGGACTTTGGCGGGGTATCCACAGTCATCAGC--AGGC
AACCGCAGGCCCTAA---GCAGCTGTTACAGCAGTGGGCAGATTCTGTTTCAAACCACACACATGAAAAGACAC
TGACGTTCTTCCAGC

```

## Marker M47

>MSTB

```
-----  
-----tgatatggtttggatggtttgtcccctccaaatctcatggtgaaatgtgatcc  
ccagtgttggaggtggggcctggtgggaggtggtttggatcatggggcggatccctcatgaatggcttggcgccatcc  
ccttggatgatgagtgagttctcgctctgtagttcacgcgagatctgggtggttaaagagntggcacctccccct  
ctctctcttgcctccgctctcgcca---tgtgacgtgctgctcccccttcgccttctgccatgattgnaagcttcc  
gagg-cctcaccagaagccgagcagatgcccggcgcctgcttccctgtacagcctgcagaaccgtgagccaattaaacc  
tcttttctttataaattaccagcctcaggtatttctttatagcaacgcaagaacggactaacaca-----  
-----
```

>Human

```
AATAGTTCAGAGACAATTTTGC GGGTAGGGTTTTGGTGGCAGATCTATTCAC TTATCCTCA--TTTTTTT---TTTT  
TGTT CAGAATAGTGA---ATCTT---tgatgtagcttgaatggtttgtcccctccaagtctcatggtgacatgtgatcc  
ccagtgttgcaggtggggcctggtgggaggtggtttgggtcatga-ggtggattcctcg-ggacagtttgatgccattc  
tgacaagatggagtgagttcttactctt--ggctcctgcaagatctgggtggt-----aagtctgctgcctcctccc  
ctctctttggcctcctcctctcttctgctgacttattttctcccccttcacctccaccatgagtagaaacttcat  
gaggacttcaccagaagctgagcagatgctggtaccgtgcttccctgtataacctgcagaacctgagccaaataaatc  
tcttttctttatgaattaccagccccaggcattccattatagcaatgcaa--atggactaagaca---ACCTT---T  
AAAAAACTAATAAATAAAAAATATCATTTAATACTACTATTCTT
```

>Chimp

```
AATAGTTCAGAGACAATTTTGC TGGTAGGGTGGTGGCAGATCTATTCAC TTATACTCA--TTTTTTT---TTTT  
TGTT CAGAATAGTGA---ATCTT---tgatgtagcttgaatggtttgtcccctccaagtctcatggtgacatgtgatcc  
ccagtgttgcaggtggggcctggtgggaggtggtttgggtcatga-ggtggattcctca-ggacggtttgatgccattc  
tgacaagatggagtgagttcttactctt--ggctcctgcaagatctgggtggt-----aagtctgctgcctcctccc  
ctctctttggcctcctcctctcttctgctgacttattttctcccccttcacctccaccatgagtagaaacttcat  
gaggacttcaccagaagctgagcagatgctggtaccatgcttccctgtataacctgcagaacctgagccaaataaatc  
tcttttctttatgaattaccagccccaggcattccattatagcaatgcaa--atggactaagaca---ACCTT---T  
AAAAAACTAATAAATAAAAAATATCATTTAATACTACTATTCTT
```

>Orangutan

```
AATAGTTCAGAGACAATTTTTCTGGTAGGGCACTGGTGGCAGATCCATTAC TTATCCTCA---TTTTTTT---TG TG  
TGTT CAGAATAGTGA---ATCTT---tgatatagcttgaatggtttgtcccctccaagtctcatggtgacatgtgaccc  
ccagtgttgcaggtggggcctgatgggaggtggtttgggtcatga-ggtggattcctca-ggacggtttgatgccattc  
tgacaagatggagtgagttcttactctt--ggctcctgcaagatctgggtggttaagagaagtctgctgcctcctccc  
ctctctttggcctcctcctctcttctgctgacttattttgtcccccttcacattccaccatgagtagaaacttct  
gaggacttcaccagaagctgagcagatgctggtaccatgcttccctgtatagcctgcagaacctgagccaaataaatc  
tcttttctttatgaattaccagcctcaggcattccattatagcaatgcaa--atggactaagaca---AGCTT---T  
-AAAAAGCTATTAATAAAAAATATCGTTTAATACTACTATTCTT
```

>Baboon

```
AATAGTTCAGAGACAATTTTTGC TGGTAGAGTGGTGGCAGATCTGTTAC TTATCCTCA--TTTTTTT---TTGTTGT  
TGTT CAGAATAGTGA---ATCTT---tgatatagcttgaatggtttgtcccctccaagtctcatggtgacatgtgatcc  
ccagtgttgcaggtggggcctggtgggaggtggtttgggtcatga-ggtggattccttg-ggatgggttgggtgccattc  
tcacaagatggagtgagttcttactctt--ggctcctgcaagatctgggtggttaagagaagtctgctgcctcctccc  
ctctctttggcctcctcctctcttctgctgacttattttgtaccgcttcacctccaccatgagtagaaacttct  
gaggacttcaccagaagctgagcagatgctggcgcctgcttcccgcctagcctgcagaacctcagccaaataaatc  
tgtttctttatgaattaccagcctcaggcattccactatagcaatgcaa--atggactaagaca---ACCTT---T  
-TAAAACTATTAATAAAAAATATCATTTAATACTACTATTCTT
```

>Rhesus

```
AATAGTTCAGAGACAATTTTTGC TGGTAGAGTGGTGGCAGATCTGTTAC TTATCCTCA--TTTTTTT---TTTT  
TGTT CAGAATAGTGA---ATCTT---ttatatagcttgaatggtttgtcccctccaagtctcatggtgacatgtgatcc  
ccagtgttgcaggtggggcctggtgggaggtggtttgggtcatga-ggtggattccttg-ggatgggttgggtgccattc  
tcacaagatggagtgagttcttactctt--ggctcctgcaagatctggctggttaagagaagtctgctgcctcctccc  
ctctctttggcctcctcctctcttctgctgacttattttgtcccacttcacctccaccatgagtagaaacttct  
gaggacttcaccagaagctgagcagacgctggcgcctgcttcccgcctagcctgcagaacctcagccaaataaatc  
tgtttctttatgaattaccagcctcaggcattccactatagcaatgcaa--atggactaagaca---ACCTT---T  
-TAAAACTATTAATAAAAAATATCATTTAATACTACTATTCTT
```

>Marmoset

AATAGTTGAGAGACAATTTTGCTGGTAGGGCACTGGT-GCAGATCTATTTACTTATCTTCATTTTTTTTTT---TTGT  
TGTTTCAGAACATTGA---ATCTT---tgatatagcttgaatgtttgtcccctccaagtctcatgttgacatgtgatcc  
ccagtggtggaggtggggcctgggtgggaggtgtttgggtcatga-ggtggattcctcg-ggatggctctgatgccattc  
tcacaagatggagtgagttcttactctt--ggcttctgcaagatctgggtgtaagaggagctctgggtgcctttttctc  
ctctctttggcctcctcttctcttctgtcatgtgaaatatttgcctccccttcatcttccaccatcagtggaacttctc  
gaggacttcaccagaagctgagcagatgctggcgccatgcttccctgtacagcctgcagaacctagagccaaataaacc  
tcttttctttataaattaccagcctcagggcatcccactagagcaatgcaa--atggactaagaca---ACCTT---T  
AAAAAAAAAGATTAGATAAAAAATATTATTTAATACACCACTCTT

>Tarsier

AATAGTTAAGACACAATTTTGCTGGTAGGGCATTAGTGGTTGATCCATTACCTATCCTTA--ATTTGCTGCTGTTGT  
TGCTAAGAACAGTGA---ACCTT---t-atctagtttgggtatctgtcctctccgaatcttatgttgaaatgtgatcc  
ccagcataggtggtaggacctggaggggaagtg-ttgggtcagga-ggtggatccctcatgaactgctgggtgctgttc  
ttgcaggattgagcaggttcttactgtt--agcttctcaagatatggctgttgaaaaaagtctgggtgcctcctccc  
acctc--tggcctcttcccactcactgtgggacacacctgcttcc-cctcgtcttctgcatgattggaagcttctc  
gagg-cctcatcaga-----agcaaatgctggcaccatgcttcttgtacagcctgcagaacctgaaactgacacatc  
tcttttctttataagttatccaatctcgggtaatccatttttagcaacacaa--atggact--gaca---ATCTT---A  
AAGTAAGCCATTAAAT-AAAATATTATTTATTATACTGTTGTT

>Bushbaby

AATATCCAAGAGTCAGTTT-----TGGAGGCTGATCTATTTATCTATCCTCA---TTATTT----T--T  
TGTTTCATAACAGTGA-----  
-----  
-----  
-----  
-----GCCTT---G  
-----AATTATTAATAAAACTATTATCTGCTAAACTGTCCTC

>Mouse\_lemur

AACAGTGAAGGGACAGCTT-----CGGCTGCAGATCTACTCACCTATCCTCA---TTTTTT---TTGT  
TGTTTCATAACAGTGA-----  
-----  
-----  
-----ACCGT---G  
AAACAAATTATTAATGAAAATATTATTTGATAAACTGTTCTT

>Horse

---GCTAAGAGGCAGTTTTGCCACTAGGGGGTTAGGGGAAAGTTTATGCACCTATCCTCA-----TTT---CTTT  
GGTTCTGAACAGTGA-----  
-----  
-----  
-----AACTT---A  
AAATAAACTTTAAAT---ACTGATATTTAAACACTGTTCTT



caccttgctttttgtacagcctgtagaactgtaagccagctaagcctctttttctttataaatgaccattcctcaggt  
gttcctttatagcaa-----atgactgagata----ACACC---CAACCTCCCTGTGACTATGCTTCTGACCCAC  
TGCAGCTTCACTGGCTCCTTCGTTAC----TCTGATTTTTTACCTGATTCACTGCTTCTTATTTC-----TAATGGCT  
TTCATGTTACCAAGAAG-AGCTCAGTATC--CACCTG-----TCTCCCAAAGGCCTCCCTCTCATGTGAAC  
TGAAAAAATCTTG

>Baboon

TTC----TAACACTGAAACCTTCTT-----GTCACATCTTTCTAAATGA-----ATTTTGGAGGTATCTTTGGTGACT  
GGTCTGTCCAGAGCCATAGAAAATGTCAGAATCATGCTT-ATGTTTATGACCATTTTCTTTTTCATCCACCCTCTCCAC  
CTGCAAGCTGGCTACGGGCTTCGAAGAACTTTC-TTAGTGGGGAGGGCTGAAGAACAGCAACAGCACAC-GATCATT  
TATTGTTACCATCTCAGGCTATTGACATCAACTCAGTCAAATAATTAACCCACTCATATTTCAAAGCTTCTAGTAA  
CTACC-ATGGCCATTAATTTTAACTCAA-ATTCCACTCTTGGCATCTGAAGTTCTGCCAGA---GCTCC---tgat  
-tactttgaatatctgtctcctccaaatctcatggtgacggttgatcctt--tggtggaggtggggcctgggtgggagg  
tggttgggtcacaggggagatccctcatgaatggcttgat---accaacctgtagtaatgcaggagtttttgctcta  
ttcgcttacctgagagttggttgggttgaagggcatggtacctctccccctctctctcttctgctcccttctctgctaa  
gtgatgctgctctcctt-atcttctggtatgagtggaagctccctgcagccctcaccagaag-----cagatggtgc  
caccatgctttttgtacagctctgcagaactgtgagccaaataaggctcttttctttataaatgaccattcctcaggt  
gttactttatagcaa-----atgactgagaca----ACTCC---CAACCTCCCCGTGACTATGCTTCTGACCCAC  
TGCAGCTTCACTGTCTCCTTCCTGACTCTATCTGATTCTTTCAGTGATTCACTGCTTCTTATTTC-----TAATGGCT  
TTCCTGTTACCAAGAAG-AGCTCAGTATC--CACCA-----TCTCCCAAAGTCTCCCTCTCATGTGAAC  
TGAAAAAATCTTG

>Rhesus

TTC----TAACACTGAAACCTTCTT-----GTCACATCTTTCTAAATGA-----ATTTTGGAGGTATCTTTGGTGACT  
GGTCTGTCCAGAGCCATAGAAAATGTCAGAATCATGCTT-ATGTTTCTGACCATTTTCTTTTTCATCCACCCTCTCCAC  
CTGCAAGCTGGCTACAGGCTTCGAAGAACTTTC-TTAGTGGGGAGGGCTGAAGAACAGCAACAGCACAC-CATCACC-  
-ATTGTTACCATCTCAGGCTGTTGACATCAACTCAGTCAAATAATTAACCCACTCATATTTCAAAGCTTCTAGTAA  
CTACC-ATGGCCATTAATTTTAACTCAA-ATTCCACTCTTGGCATCTGAAGTTCTGCCAGA---GCTCC---tgat  
-tactttgaatatctgtctcctccaaatctcatggtgacggttgatacctt--tggtggaggtggggcctgggtgggagg  
tggttgggtcacaggggagatccctcatgaatggcttggt---accaacctgtagtaatgcaggagtttttgctcta  
ttcgcttacctgagaattggttgggttgaagggcatggtacctctccccctctctctcttctgctcccttctctgctaa  
gtgatgctgctctcctt-atcttctggtatgagtggaagctccctgcagccctcaccaggag-----cagatggtgc  
caccatgctttttgtacagctctgcagaactgtgagccaaataaggctcttttctttataaatgacccttctcaggt  
gttcctttatagcaa-----atacactgagaca----ACTCC---CAACCTCCCCGTGACTATGCTTCTGACCCAC  
TGTAGCTTCACTGGCTCCTTCCTGACTCTATCTGATTCTTTCACCTGATTCACTGCTTCTTATTTC-----TAATGGCT  
TTCCTGTTACCAAGAAG-AGCTCAGTATC--CACCA-----TCTCCCAAAGGCCTCCCTCTCATGTGAAC  
TGAAAAAATCTTA

>Marmoset

TTCGACCTAACACTGAAAACCTTCTAAGACAGAAACATCTTTCTAAGTAA-----ATTTTGGAGATATCTCAGGTGACC  
AGTCTATCCAGAGCCATAGAAAATGGCAGAATCATGCTT-GTGTCCATGACCATTTTCTTTTTCATCCACCCTCTCCAC  
CTGCAAGCTGAGTGTGGGCTTCAAAGAACTTTCATTGTGGGAAGGGCTGAAGAACATCAACAGCACACGAATCATC-  
-ATTGTTACTATCTCAGGC-ATTGACATCAACTCAATGAAATAATTAACCCCAAGCATATTTCAAAGCTTCTAGGAA  
CTACC-TTGGCAATTAATTTCAACCTCAA-ATTTCACTCTGGGCATTTGAAGTTCTGCCAGA---CCTCC---tgac  
-tgctttgggttattttgtctcctccaaatctcatggtgaaatgtgatcctt--cattggaggtggggcctcgtgggaca  
tggttgggtcacagggggtggatccctcaaaaatgagttggc---accgacctgtggaatggaggagtttttgctcga  
ttagctcacctgagagttggttgggttggaaaaggcctggtacctctcccccttctctcttctctctgctcccttctctgctaa  
gtgatgctgctctccttcatcttctgctgtgagtggaagctcccggcagc-----  
----atgctttttgtacagcctgcagaactgtgaacaaataagcctcttttctttatataatgaccag-cctcaggt  
gttcctttataacaacacaa--atgactgagaca----ACTCC---CAACCTCCCCATAACTATGCTTCTGATCGGC  
TCCAGCTGCACTGGCTCCTTCCTGACTCTACCCAATTCTTTACCTGATTCACTGGTTCTGCTC-----TAATGGCT  
TTCCTGTTACCGAGAAG-AGCTCAGCACC--CACCTG-----TCTTCCCAAAGTCTCCCTCTCATTGATC  
TGAAAAAACCTTG

>Tarsier

TTC----TAACATCGCACCCCTCTT-----GTCCTGTCTTTCTAAGTGA-----ATATTGCAGGTATCTCAGGGGACC  
AGTCTCCCCAGGGCTACACAAAATGACAGACACATACTT-GTGTCCACGATCGTTCCCTTCTCATCACCCCTTCTCCAC  
TTACAAGCTGGCTATTGACTTACAGGCCTGTCC-----GCGGGGCTGAAGAACACCAAT-GTTCATGAATGACC-  
-AGTGTACCATCTCGGGCCATTTACATCAACTCAATCAAATAATTAACCTTGGCCACATTTAAAAGCTTTCAATAA  
TTCC-ATGACCATTAATTTTAACTTATA-ATTCCACTCTTGGCCCTTGAACCTTTGCCAAA---CCTCT---tgac  
atagtttggatgcttctcctcctctaaatctcatggtgaaatgtgatcccagtggtggaggtggggcctgttgggagg

tgtctgggtcatgggggtggagccctcggaatgacttctt-----ataagtgaattcttgctctg  
ctagttcatgggagagctgggtggtttaaagaacatgactccccttctgtctctcccttgtttccttctcttgccat  
gtgatgcctgttccttttggccttctgctatgagtggtgcttccctgaagccctcaccagata-----cagttcctgg  
cgccatgcttcttgtagccttggtagatgaaccaaataagacctcttttcttttaacttacctag-ccttagat  
attcttttatagcaatgcaa-----aacagactaA---GCTCC---CAATCTCCC-ATAATTATGCTCCTGACCCAC  
TGCA-----  
-----

>Bushbaby

TTC----TAAATCGAAGCCTTCTT-----GTCATGTCTCTCTAAGTGC-----CTTT--GAGGCATCTCCGATGATG  
ATTCTCTC-----AGAGCCATGCTG-GTGTTTCATGGTCTTTTTCTTCTCATCAGCCCTCTCCAC  
CTGCAAGCTGACTATTGGCTTCAAAGGACTTTGCATGGTTGGAACAAAGGAAGAACA-TCAAAGCACATGCATAATT-  
-GTTGCTACCATCTTAGACCTTTTTCTATCAATTCAATTAATAATAATAAATTGCCCCGATTTCAAAGTGCCCAATAA  
CTCCC-ATTGCCTTTAATTTTAACCTCAAA-ATCCCACTCATGCCATTTCGAAACTCTGCCAAA-----  
-----  
-----  
-----

-----GTTCC---CAACCTCTGCTTGACTATGGTCTGACCCTT  
CCCAGCGGTACTGGCCCCCTCTGATCCTATCTGATTTTTTAACTGATTGATTCACTGGTTTTGAC-----TAA-----  
-----AACTCAGCATC--CACCTT-----TCCCTCAAAGTCTCCCAATCATGCAAA  
TGGAAGAAACCTG

>Mouse\_lemur

TTC----TAACACTGAGCCCTTCTT-----GTCACACTTTTCTGAGTGC-----ATTTTGGAGCCATCTCAGGTGACC  
AGTCTCTCCAGGCCATAGAAAATGACAGAGGCATGCTG-GTGTTTCATGACCATTTTCTTCTCACCAGCCCTCACCAC  
TTGCAAGCTGACTATTGGCTTCAAAGGATTTTCCATGGTTGGAAGAACTGAAGAATACTGAAAGCACAAAGGATAATC-  
-ATTGTTACTATCTCAAGCCTTTTTATGGCAACTCAATTAATAAATAAATAAATCACCAGCATTTCAAAAGCTACCAATAA  
CTCCC-GTGACCATTAATTTTAACCTCAAA-ATCTCACTCTTGGCATTTCGAAACTTTGCCAAG-----  
-----  
-----  
-----

-----GCCCC---CAACCTCCCCATGGCTATGGCCCCGACCCAC  
TGCAGCTGCGTTGACACCTTCTGAT----TCTGATTTCTTTTCTGAGTCACTGGTTTCTACCCCGACTAATGGCT  
TTCCTGTTGCCAAAATGAACTCAGCATC--CACTTT-----TCCCGCAAAGTTCCCCCAATCATACTAAC  
TGGAAGAATCTTG

>Mouse

TTC----TAATTTTGGAGCCT-CTT-----GTCACATCTTCTAAGTCATTTTGGATTTGAGAGGTATCTCCAGCAACT  
ATTCTCTCCAGACCCATAGAAGTTAACAGAGACCTGCCTCATGTTTCATGATCATTGCTACCCTCAAATTCTCTTCTC  
TTACAAGCTTGTGTCAGGTCTCAATGGCATTCTAGAGTTAGAATGCTTGGGAATGCCAACAGCACAAAATAATC-  
-ATGGCTCTCACCTCAGACCACCAACACCACCTCAGTTAAACA--GAAGTACAACCACATTTTAAGATATTCAAATAA  
TTTTG-GTGACCATTCTTTCTAACTTCAAA--CTCCAGCCTTGACATTTGAACATTACCAAT-----  
-----  
-----  
-----

-----GGCCT---CA-----CAATTCTCCTTACTCCT  
GGCAGCTGTACGGGTTCCCTGACAGA----TCTGTTT---ATCTAGTTTCATAGCTTCTTATGCTCCTATCTAAGATG  
AACTTTGTATCCACCAC-CTCCTACCCTCAGAACCAAGATGAACACAGCAACCCTAAGTATTCCCCGGCATGCTAAC  
TGGAAAACTCTT-

>Dog

TTC----TCACGTTGAGCACTTCTT-----GTCACATCTTTCCAAGGGCCTTGATTTAGAAGGTATCTCAGGTGACC  
ATTCTCTCCAGAGCCATAGAAAAA-----TGG-----CTTTCTTCTCTGCAGCTCCTTCCAT  
TTGCAAGCTGCCTATTGGCTTCAAGAGACTTTCTACTGTTGAAGGTGAGAAGAAGAGCAAATGCACGAGAATAATC-

-ACTGTCACCCTCTGAAGCCATTTACATCAGCTCCATCAAACAA----GCCCACTCACATTGCAAAATCGTCCAATAG  
CGCCTCATTACCATTAATTTTAACCTCAAATATCCCAATCTTAGTATTTGAAGGTCTGCCAAA-----

-----  
-----  
-----  
-----

-----GCTGC---CAGCCTCCCCATGATTATGCTCCCTGCCAAC  
TGCAGCTGCACTGGTTCCCTCCCTGATTACAACAGACTCTTTACTTGATCCACTGGTTGTTCTCC-CAGAATGGTGGCT  
TTCCCATTCAGAGAAG-AGCTCACCATC--CCCTTT-----CTTGCCAATATGCCCCCTATCATGCAAAG  
TGGAAGAA-----

>Horse

TTC----TAACACTGAGCCCTTCTT-----GTCACATCTTTCTAAGGGACCTTGATTTTGGAGGTGTCTCAGGTGACC  
TTTCTCTCCAGAACCATAGAAAAGGACAGAAGCATGCTTTGTGGTCACCTTCATTTTCTGCATGTCAGCCCTTCCAC  
TCACAAGCTGGCTGTTGGTTTTAAAGGACTGTCCACTGTTGGAGGGTCAGAAAAACCGGAGCACAAAAGAGTAATC-  
-ACTGTCACCGTCAGAGGCCGTTTTATGTCAACTCCACTAAATAATTGAACCCAC-CACATTTAAAAATCTTCCAAGA-  
GCTCCTATTACCATTAATT-AACCTCAGA-ATCCCAATCTTGGCATCTGAGACCCTGCCAAA-----

-----  
-----  
-----  
-----

-----ACTCC---CAGCTTCCCCACGATGATGCTCCCTGCCAC  
TGCAGTGGCATTGGCTCTTTACTGATTGTATCTGACTCTTTACTTGAT--ACTGGTTGTTACCC-CAGACCAATGGCT  
TTCCCGTTACCAAGAAG-AGCTCAGCATC--CACCTT-----CCCCCAAAAACCTCCCTATCATGCAAAC  
CGGAGGAA-----

## Marker M51

>MSTB1

```
-----  
-----tgctatagtttggatggtt-gt-cccctccaaacctcatggtgaaatttgatccccagtggtggaggtggg  
gcctaattgggaggtggttgggcatgggggaggatccctcatgaatagattaatgccctccctcgggggaggatgag  
tgagttctcactctattagttcccgcgagagctgggtggt-----aaaaagagcctggcacctccctcctctctct  
tgcttctctctcgccatg--tgatctctgcacacgcggctccccttcaccttccgcatgagtggaagcag-cctg  
aggccctcaccagaagca-----gatgctggcgccatgcttcttgtacagcctgcagaaccgtgagccaaataaac  
tcttttctttataaattaccagcctcaggtattcctttatagcaacacaaaatggactaagaca-----  
-----
```

>Human

```
GAATTGGCAAGATCAGATTATT---AACTGAGAAACAGCTATAACTAGCATTATTATTGGCACTTCCTACATA---CCA  
A---G---tgctatacttttgatggtt-gt-cctcccgaacattatggtgaaattcag-tgccaaattctggaa----g  
gcctaattggcagagcttggattatgggggagaggtcccagaatggccttgggtgccttccct----gtggtaacaaa  
taagttctcactctattaattcacatgagagctgggtggt-----aaaaagtgcctgccttcccc--tctgctccgct  
tgct-tctctcatgtgatc--tg-cacatcccagctccccatccccttccac-----catgagtggaagcag-cttg  
aggccctcaccagaagca-----gatgctgggtgctcatcttcttgtacagcctgtggaactgtgagccaaataaatc  
tcttttggtttacaaa-tatcatgcctcaggcattcctttgtagcaacacaaa-atggattatgaca---TGAGG---CA  
ATATAAAATTATTGGAACTTACTAAAAGAGGATGAAGTGATATCAAAGAT---C
```

>Chimp

```
GAATTGGCAAGATCAGATTATT---AACTGAGAAACAGCTATAACTAGCATTATTATTGGCACTTCCTACATA---CCA  
A---G---tgctatacttttgatggtt-gt-ccccccgaacattatggtgaaattcag-tgccaaattctggaa----g  
gcctaattggcaggtggttggattatgagggcagaggtcccagaatggccttgggtgccttccct----gtggtaacaaa  
taagttctcactctattaattcacatgagagctgggtggt-----aaaaagtgcctgccttcccc--tctgctccgct  
tgct-tctctcatgtgatc--tg-cacatcccagctccccatccccttccac-----catgagaggaagcag-cttg  
aggccctcaccagaagca-----gttgctgggtgctcatcttcttgtacagcctgcggaactgtgagccaaataaac  
tcttttggtttacaaa-tatcatgcctcaggcattcctttgtagcaacacaaa-atggattatgaca---TGAAG---CA  
ATATAAAATTATTGGAACTTACTAAAAGAGGATGAAGTGATATCAAAGAT---C
```

>Orangutan

```
GAATTGGCAAGATCAGATTATT---AACTGAGAAACAGCTATAACTAGCATTATTATTGGCACCTCCTACATA---CAA  
A---G---tgctatacttctgatggtt-gt-ccccccgaacattatggtgaaatttctg-tgccaaatttggaa----g  
gcctaattggcagatggttggattatgggggagaggtcccagaatggccttgggtgccttccct----gtggtaacaaa  
taagttatcactctattaattcacatgacagctgggtggt-----aaaaggtgcctgccttcccc--tctgctccgct  
tgct-tctctcatgtgatc--tg-tacatcccagctcccagctccccttccac-----catgagtggaagcag-cttg  
aggccctcaccagaagca-----gttgctgggtgctcatggttacttgtacagcctgcggaactgtgagccaaataaac  
tcttttggtttacaaaattatcatgcctcaggcattccttctgtagcaacacaaa-atggattatgaca---TGAGG---CA  
ATATAAAATTATTGGAACTTACTAAAAGAGGATGAAGTGATATCAAAGAT---C
```

>Baboon

```
GAATTGGCAAGATCAGATTTGT---AACTGAGAAACAGCTATAACTAGCATTATTATTGGTACTTCCTACATA---CCA  
A---G---tgctatacttttgggtggtt-gt-ccccacaaacattatgctgaaattcag-tcccaaatttggag----g  
gcctaattggcaggtggttggatgatgggggacattgtcccagaatgacttgggtgccttccct----gtggtaacaaa  
taagttctcactctattaattcacatgacagctgggtggt-----aaaaagtgcctgccttcccc--tctgctctgct  
tgct-tctctcacgtgatc--tg-cacaccccaggtcccattccccttacac-----tatgagtggaagcag-cttg  
aggccctcaccagatgca-----gttgctgggtgcatggttcttgcacagcctgcagacctgtgagccaaataaac  
tcttttggtttataaatgatcatgcctcaggcattcctttgtaacaacacaaa-atggattatgaca---CGAAA---CG  
GTATAAAATTATTGGAACTTACTAAAAGAGGATGAAGTGATATCAAAGGT---C
```

>Rhesus

```
GAATTGGCAAGATCAGATTTTT---AACTGAGAAACAGCTATAACTAGCATTATTATTGGAACTTCCTACATA---CCA  
A---G---tgctatacttttgatggtt-gt-ctccacaaacattatgctgaaattcag-tcccaaatttggag----g  
gcctaattggcaggtggttggatgatgggggacattgtcccagaatgacttgggtgccttccct----gtggtaacaaa  
taagttctcactctattaattcacatgacagctgggtggt-----aaaaagtgcctgccttcccc--tctgctctgct  
tgct-tctctcacgtgatc--cg-cacacctcaggtcccattccccttacac-----tatgagtggaagcag-cttg  
aggccctcaccagatgca-----gttgctgggtgcatggttcttgcacagcctgcagacctgtgagccaaataaac  
tcttttggtttataaatgatcatgcctcaggcattcctttgtaacaacacaaa-atggattatgaca---CGAAA---CA  
GTATAAAATTATTGGAACTTACTAAAAGTAGGATGAAGTGATATCAAAGGT---C
```





## Marker M51

>MSTB

```
-----  
-----  
-----tgatatgggttggatggttgcctcccaatctcatggtgaaatgtgatccccagtggttggga  
ggtggggcctggtgggaggtggttggatcatggggcggatccctcatgaatggccttggcgccatcccccttggatg  
agtgagttctcgctctgtagttcacgcgagatctggttgtttaaagagntggcacctccccctctctctcttgc  
tcccgcctcgccatgtgacgtgectgctcccccttgccttctgcatgattgnaagcttccctgagggcctcaccaga  
agccgagcagatgcccggcgcctgcttctgtacagcctgcagaaccgtgagccaattaaacctctttctttataaa  
-----ttaccagcctcaggtatttctttatagcaacgcaagaacggactaac-aca-----  
-----  
-----
```

>Human

```
TGAAGTCTAACAACTCATTGCATGTAATTGATAATTTGCAATATGTCCTGGATCTACAGAATAGCAAACTATGGTAT  
-----AAATAGTTTTCTGCTTTGTTGAGTGAGTGCTTTGAAGACCTAAGAACTTTAGG-----GAAGCAAAGAA  
TGA---CATCT---tg-----ttgga  
ggcggggcctgaagggaggtggttgg-ttatggggcagatctctcatgaactg-tttggtgccttctggcagtaa  
tgtgtga-cttcttgcctag-----agctggttgtttaaagcagccagcacc---cttcttcttgccttgc  
tccctgttttgccatgtgacacactggctctcctt--gccttctccatgaataaaagcttccctgagacctcaccaga  
agctgagcagatactggtgccatggttcttgtacagcctgccgtacc-----ataaatttctttcttcatcaa  
-----ttaccctatctcaggtagtcctttacagcaatgtaa-aacagactaatgaaa---CATAC---AGAGGCTGTG  
GACGAGTTTTAACCTGCGCCG-----ACATGAGAGAGGCTTAAGCACTATTGGGGGTAGAAGAGGAG  
GGAGGCATATCAACCCTGAAGACAGCACA-----AAGAGGGAGGAAAAACAGGAATTGAGGTCAACCTTCACTCG  
CTGAAAAGCTTA-----AATATTGTGTGCATGTGTTTT-T
```

>Chimp

```
TGAGGTCTAACAACTCATTGCATGTAATTGATAATTTGCAATATGTCCTGGATCTACAGAATAGCAAACTATGGTAT  
-----AAATAGTTTTCTGCTTTGTTGAGTGAGTGCTTTGAAGACCTAAGAACTTTAGG-----GAAGCAAAGAA  
TGA---CATCT---tg-----ttgga  
ggtggggcctgaagggaggtattttgg-ttatggggcagatctctcatgaactg-tttggtgccttctggcagtaa  
tgtgtga-cttcttgcctag-----agctggttgtttaaagcagccagcacc---cttcttcttgccttgc  
tccctcttttgccatgtgacacactggctctcctt--gccttctccatgaataaaagcttccctgagacctcacaaga  
agctgagcagatactggtgccatggttcttgtacagcctgccgtacc-----ataaatttctttcttcatcaa  
-----ttaccctatctcaggtagtccttttagagcactgtaa-aacagactaatgaaa---CATAC---AGAGGCTGTG  
GACGAGTTTTAACCTGTGCCG-----ACATGAGAGAGGCTTAAGCACTGTTGGGGGTAGAAGAGGAG  
GGAGGCATATCAACCCTGAAGACAGCACA-----AAGAGGGAGGAAAAACAGGAATTGAGGTCAACCTTCACTCG  
CTGAAAAGCTTA-----AATATTGTGTGCATGTGTTTT-T
```

>Orangutan

```
TGAAGCCTAACAACTCATTGCATGTAAGTATAATTTGCAATATGCCCTGGATCTACAGAATAGCATAACTATGGTAT  
-----AAATACTTTTTCTGCTTTGTTGAGTGAGTGCTTTGAAGACCTAAGAACTTTAGG-----GAAGCAAAGAA  
TGA---CATCT---tg-----ttgga  
gatggggcctgaagggaggtggttgg-tcatggggcagatctcccatgaactg-tttggtgccttctggcagtaa  
tgtgtga-cttcttgcctag-----agctggttgtttaaagcagccagcacc---cttcttcttgccttgc  
tccctcttttgccatgggacacactggcttctcctt--gtcttctccatgagtaaa-tcttctgagacctcaccaga  
agctgagcagatactggtgccatggttcttgtacagcctgccgtacc-----ataaatttctttcttcatcaa  
-----ttaccctatctcaagtactcctttatagca-tgtaa-agcagactaatgaaa---CATAC---AGAGGCTGTG  
GACAAGTTTTAACCTGTGCCG-----ACATGAGAGAGGCTTAAGCACTATTGGGGGTAGAAGAGGAG  
GGAGGCATATCAACCCTGAAGACAGCACA-----AAGAGGGAGGAAAAACAGGAATTGAGGTCAACCTTCACTCG  
CTGAAAAGCTTA-----AATATTGTGTGCATGTGTTTT-T
```

>Rhesus

```
TGAAGCCTAACAACTCATTGCATGTAAGTATAATTTGCAATATGTCCTGGATCTACAGAATAGCATAACTATGGTAT  
-----AAATACTTTTTCACTTTGTTGAGTGAGTGCTTTGAAGACCTAAGAACTTTAGG-----GAAGCAAAGAA  
TGA---CATCT---tg-----ttgga  
ggtggggcctgaagggaggtggttgg-tcatggggcagatctctcatgaacgg-tttggtgtcttctggcagtaa  
tgtgtga-cttcttgcctag-----agctggttgtttaaagcagccggcacc---tctt---cttgccttgc  
tccctcttctgcccagtgacacactggctccccctt--gccttctccatgagtaaaagcttccctgagacctcactaga
```

agctgagaagataactggggccatgggttcttgtacagcctgccatacc-----ataaatttcctttcttcatcaa  
-----ttaccctatctcaggtattcctttatagcaatgtaa-aac-gactaatgaaa---CATCC---AGAGGCTGTG  
GACGAGTTTTAACTGTGCCA-----ATATGAGAGAGGCTTAAGCACTATTGGAGGCAGAAGATGAG  
GGAGGCACATCAACCCTGAAGACAGCAGC-----AAGAGGGAGGAAAAACAGGAAATGAGGTCAATCTTCACTCG  
CTGAAAAGCTTA-----AATATTGTGTGCATGTGTTTT-T

>Baboon

TGAAGCCTAACAACTCATTGCATGTAAGTATAATTTGCAATATGTCCTGGATCTACGGAATAGCATAACTATGGTAT  
-----AAACTTTTTCTACTTTGTTGAGTGAGTGCTTTGAAGAACTAAGAACTTTAGG-----GAAGCAAAGAA  
TGA---CATCT---tg-----  
ggtggggcctgaagggaggtggttggg-tcatgggggcagatctctcatgaacgg-tttggtgccttcctggcagtaa  
tgtgtga-cttcttgccttag-----agctgggtgtttaaacagcccggcacc---tctt---cttgccttgc  
tccctctcttggccacgtgacacactgggtcccctt--gccttcctccatgagtaaaagcttcctgagacctcactaga  
agctgagaagataactggggccatgggttcttgtacagcctgccatacc-----ataaatttcctttcttcatcaa  
-----ttaccctatctcaggtattcctttagcaatgtaa-aac-gactaatgaaa---CATCC---AGAGGCTGTG  
GACGAGTTTTAACTGTGCCA-----ATATGGGAGAGGCTTAAGCACTATTGGAGGCAGAAGACGAG  
GGAGGCACATCAACCCTGAAGACAGCACA-----AAGAGGGAGGAAAAACAGGAACTGAGGTCAATCTTCACTCG  
CTGAAAAGCTTA-----AATATTGTGTGCATGTGTTTT-T

>Marmoset

-----TGCATGTAATTAATAATTTGCAATAGGTCTCTGGATCTACAGAATAGCATAACTATGGTAT  
-----AAACTTTTTCTGCTTTGTTGAGTGAGTACTTTGAAGACCTGAGAACTTTAGG-----GAAGCATAGAA  
TAA---CATCT---tg-----  
ggtggggactgaaggaaggtgtctggggcagatctctcatgaacag-tttggtgccttcctggcagtaa  
tgtctga-cttcttgccttgg-----agctgggtgtttaaacagcctggaacc---ccttcaccttgccttgc  
tccctct--tgccatgtgacacacaggtctctgctt--gccttcctccatgagtaaaatcttctgagacctcaccaga  
agctgagcagacaatagtgcctgggtcttaccacaacctgccatacc-----ataaatttcctttcttcatcaa  
-----ttactatatctcaggtattcctttacagcaataaa-aacagactaatgaaa---CATCC---AAAGGCTGTG  
GATGAATTTTTAACTGCCTG-----ACATAAGAGAGGTTTAAGCACTACTGGAA-TGCGGGAGGAG  
AGAGACACATCAGCCCTGAAGACAGCACA-----AACAGTGAGGGAAAAACAGGAACTGAGGTCAACCTTCACTGG  
GTGAAAAGCTTA-----AATATTGTGTGGATGTGTTTT-T

>Tarsier

TAGAGTCTAACAACTCATTGCAAGTAATTGAAAATTTGCAATGCCTCCTAGATGTACAGAATTACATAAGGGTGGTAT  
-----AAATATTTTTCTGCTTTGCTGAGTGAGCACTTTTTAAGATCACAGAACTTTAGG-----GAAGCAAGGAA  
TCA---CATC-----tgatatagtttggatggttgggtccctctaaatctcatggtgaaatgctagccctaacattgga  
ggtgaggcctggtgggaggtggttggg-tcatgggg-tggatcttcatgaatggctttgatgccctcctgcactga  
tgagtaa-gttctccctctacgaattcctgacagcgggttgggttaaacagagcctggcacttacctccccttacttgc  
cgcctct--caccatgtgacac-ctggctcccctt--gccttca-cagtaagagaaagcttcctgagcctcactagc  
agctgagcagatgccagtgccctgcttccctgtacagctctgcagaattgtgagccaaataaacctttttcttccaga  
gacttttacccaatctcaggtatcccctttatagcaaccag-aatggactaataaaa---TACCC---AAAGGCCGAG  
GAGTAGTTTTAATCTCCACAGGGATGGGGACAGCAGGGCTAAGAGAAGCTTAAGCAGCATTG-----AGAAGGGGAG  
AAAGTCACATCAACTCTGAGGATAGCACAGAGTGACAAAGTGGGAGGGAAAAACAGGAACTGAGGTCAACCTTCAATTTG  
CTGAAAAGCTTA-----AATACTGTGTAGGTGTATTTT-T

>Bushbaby

TGCTTTGAAA-----TGCATGTAAGTATGATTTCCAACAATTCCTGGATCTACAGAATAGCAAAAAGGTGTAT  
-----AAATATTTTTCTGATTTGTTGAGTGAGTGCTTTTAAGGCTTCAGAACTCTAGG-----GAAGCAAAGAA  
TAA-----  
-----  
-----  
-----  
-----  
-----  
-----  
-----  
-----  
-----CAGCC---TAAGGTACTG  
CAGCAGACTTAACCTGTCCTT-----AAGCACTGCTTAAGCACTCCTAGGG-CAGAAGGGGAG  
AGAGTCATGTTAGCACTGAGGACAGTACA-----AAGTGGGAGGAGAAACAAG-AGCCAAGGTCAACCTTTACTCA  
CTGAAAAGTTTTA-----AATACTGTGTAGGAGTGTTTTTAT

>Mouse\_lemur

-----  
-----TTTGTGAGTGAGTGCTTTGAAGGCCTCGGAACTTTAGG-----GAAGCAAAGAA  
TAA-----



## Marker M53

>MSTB1

```
-----  
-----  
-----tgctatagtttggatgt  
ttgtcccctccaaacctcatggtgaaatgatccccagtggtggaggt---ggggcctaaggg-aggtggttgggt  
catggggcgggatccctcatgaatagattaatgccctccctc-----ggggtggggatgagtgagttctcactctatt  
agttcccgcgagagctgggtgtt-----aaaaagagcctggcacctccctcctc--tctcttgcctcctcctc  
gccatgtgatctctgcacacgccggctccccttcaccttcgccatgagtggaagcagcctgaggccctcaccagaag  
c----agatgctggcgccatgcttctgtacagcctgcagaaccgtgagccaaataaacctcttttctttataaatta  
cccagcctcaggtattcctttatagcaacacaaaatggactaagaca-----  
-----
```

>Human

```
TGTTGCTTCAATAA-TCTTTTTGTCACCACCAA-----CCA-GAAAATGGTTTG-AGAGAGGAGAAGGTTTCCTTTG  
A-AAA-----CAATGCCCTTAAGAATGTAATCTCTGAATACTTCCTTGTCTTGTTCGTTAAGTATGTCACTT----  
-----TTGACC--ACCATGAGCTTGTC----CACTGATGATGCAAGTGT---GCAGC---tgctttgggttggat  
ttgacctctccaaatctcaagttgaaatthaatccccagtggttggaggt---ggggatataaggg-gggtggttgggt  
cctgggggtggatccttcatgaatagattaatgcccttgt-----gttgggggatgagttctcactttatt  
agctg--ttttttttttttt-----aaacctagcaccttccaaccccc---accaacttcttccctt  
cccatgtgatgtccacatgagctgtctctgctttgccttgaccatgagtggaacagcctgcagccctcatcaaaag  
c----agatgctggtgccatgcttcttatacagcctgcagagccgtgagccaagtaaacctgt----ttcatag----  
-tcagtctcaggtatttctttagcaacac-----agacttagaaa---GAAGC---TCATCATGATTCT-AGCTAA  
CTGGAGGTCTGAGAAGCATGAGCCATGGAAGATGAAGTAAATCACAACAAAGGCAAGTA
```

>Chimp

```
TGTTGCTTCAATAA-TCTTTTTGTCACCACCAA-----CCA-GAAAATGGTTTG-AGAGAGGAGAAGGTTTCCTTTG  
A-AAA-----CAATGCCCTTAAGAATGTAATCTCTGAATACTTCCTTGTCTTGTTCATTAAGTATGTCACTT----  
-----TTGACC--ACCATGAGCTTGTC----CACTGATGATGCAAGTGT---GCAGC---tgctttgggttggat  
ttgacctctccaaatctcaagttgaaatthaatccccagtggttggaggt---ggggatataaggg-gggtggttgggt  
cctggaggtggatccttcatgaatagattaatgcccttgt-----gttgggggatgagttctcactttatt  
agctg--ttttttttttttt-----aaacctagcaccttccaaccccc---accaacttcttccctt  
cccatgtgatgtccacatgagctgtctctgctttgccttgaccatgagtggaacagcctgcagccctcatcaaaag  
c----agatgctggtgccatgcttcttatacagcctgcagagccgtgagccaagtaaacctgt----ttcatag----  
-tcagtctcaggtatttctttagcaacac-----agacttagaaa---GAAGC---TCATCATGATTCT-AGCTAA  
CTGGAGGTCTGAGAAGCATGAGCCATGGAAGATGAAGTAAATCACAACAAAGGCAAGTA
```

>Orangutan

```
TGTTGCTTCAATAA-TCTTTTTGTCACCACCAA-----CCA-GAAAATGGTTTG-TAGAGAGGAGAAGGTTTCCTTTG  
A-AAA-----CAATGCCCTTAAGAATATAATCTCTGAATACTTCCTTGTCTTGTTCATTAAGTATGTCACTT----  
-----TTGACC--ACCATGAGCTTGTC----CACTGATTATGCAAATGT---GCAGT---tgctttgggttggat  
ttgacctctccaaatctcaagttgaaatthaatccccagtggttggaggt---ggggatataaggg-gggtggttgggt  
cctgcgggtggatccctcatgaatagattaatgcccttgt-----gttgggggatgagttctcactttatt  
agctg--ttttttttttttt-----aaacctagcaccttccaaccccc---accaacttcttccctt  
cccatgtgatgtctgcagctgtctctgctttgccttgaccatgagtggaacagcctgcagccctcatcaaaag  
c----agatgctggtgccatgcttcttatacagcctgcagagccgtgagccaagtaaacctgt----tttatag----  
-tcagtctcaggtatttctttacagcaacac-----agacttagaaa---GAAGC---TCATCATGATTCT-AGCTAA  
CTGGAGGTCTGAGAAGCATGAGCCATGGAAGATGAAGTAAATCACAACAAAGGCAAGTA
```

>Baboon

```
TGTTGCTTCAATAA-TC--TTTGTACCACCAA-----CCA-GAAAATGGTTTG-TAGAGAGGAGAAGGTTTCCTTTG  
AGAAA-----CAATGCCCTTAAGAATATAATCTCTGAATACTTCCTTGTCTTGTTCATTAAGTATGTCACTT----  
-----TTGACC--ACCATGAGCTTGTC----CACAGATGATGCAAGTGT---GTAGT---tgctttgggttggat  
tcgaccctccaaatctcatggtgaaatthaatccccagtggttggaggt---ggggatataaggg-gggtggttgggt  
catgggggtgaatccctcatgaatagattaatcccttgt-----gttggaggatgagttcccactttatt  
agctg--ttttttttttttt-----attaaaaaacctagcccttccaactccc---accaaatcttccctt  
cccatgtgatgtctgcagctgtctctgcttgccttgcccatgagtggaacagcctgcagctctcatcaaaag  
c----agatgctggtgccgtgcttcttatacagcctgcagagccgtgagccaataaacctgt----tttatag----  
-tcagtctcaggtatttctttatagcaacac-----agacttagaaa---GCAGC---TCACCATGATTCT-AGCTAA  
CTGGAGGTCTGAGAAGCATGAACCATGGAAGATGAAGTAAATCACAACAAAGGCAAGT-
```

>Rhesus

TGTTGCTTCAATAA-TC--TTTGTACCAACAA-----CCA-GAAAATGGTTTGTAGAGAGGAGAAGGTTTCTTTTG  
AGAAA-----CAATGCCCTTAAGAATATAATCTCTGAATACTTCCTTGTCTTGTTCATTAAGTATGTCGCTT----  
-----TTGACC--ACCATGAGCTTGTC----CACAGATGATGCAAGTGT--GTAGC---tgctttggtttggatat  
tcgaccctccaaatctcatggtgaaatttaattcccagtggtggaggt---ggggatataaggc-ggggtgttttggg  
catgggggtgaatccctcatgaatagattaataacccttgt-----ggtggaggatgagttcccactttatt  
agctgttttttttttttttttttttttaattaaaaaacctagccccctcccaactccc---accaaattcttcctt  
cccagtgatgctgcatgaactgtctctgcttcgcttgccttgccccatgagtggaacagcctgcagctctcatcaaaag  
c----agatgctgggtgccgtgcttcttatacagcctgcagagccgtgagccaaataaacttgt----tttatag----  
-tcagctcaggatattttttatagaaacac-----agacttagaaa---GCAGC---TCACCATGATTCT-AGCTAA  
CTGGAGGTCTGAGAAGCATGAACCATGGAAGATGAAGTAAATAATAACAAAGGCAAGT-

>Marmoset

-----CAA-----CCA-GAAAATGGTTTGTACAGAGGAAAAAGTTTCTTTTG  
AGAAACAATGCCCAATGCCCTTAAGAATATAATCTCTGAGTACTTCCTTGTTTTGTTCATTAAGCATGTCGCTT----  
-----TTGACC--ACCACGAGCTTGTC----CACAGATGATGCAAGTGC--ACAGC---tgctttggtttggatgt  
ttgaccctccaaatctcacattgaaatttaattctt--gtgttggaggc---ggggatataagggtgggtgtttgggt  
tatggaggtgaatccctcatga-----  
-----  
-----  
-----  
-----

>Tarsier

TGTTGCTTTCAGTAC-TCATTTTGTATTATTGTGAGAAAATTACA-GAAAATTATGTCTAGAG-----AAGTTTTCTTTG  
AGAAAAAAA--AAATGCC--TATGAATTCAACCTCTGAATACTTCCTTGTTTTCTTTACC---TGTTTCACTT----  
-----TGGACC--ACCAGCAGATTGCC----CAAAGATAATTCAAGTGT--GCAGC---tgctacagtttggatgt  
tttactcctccaaatcttatgctgaaatttgagtcctcagtggttggagtagagaggggtctaagag-aggtgtttgggt  
catgggggtg-atccctcataaatagatcaatgctttcccaggaggaaggcaaggggaaattagctttcactctatt  
agatg-----gttgtt-----aaaaatagcctgactctcctcctgctctttcactacttccccg  
gccatgtgatctctgcatatggttggctcttcttagtctttcaccatgagtg--agcaccacagggcctcaccataag  
cagatagatatcagtgccatg-ttctagtatagcttgcagaacctgagaccaataaatgtctttactttataaatga  
tccggtttcaggtattttatattatagcagcac-----gaacaaagata---GTAGC---TGATCATGATTTT-A-----  
-----

>Bushbaby

TATTGCTTTCAGTAA-TATTTCTGTTATCA-CAA-----GTA-TAGAACCGTGTGTGGGGAGGAGAAGGTTTCTTTCC  
AGTAA-----CAATTTCCCAAAAACATAATCTCCGAATACCTTTTTCATCTTCTCCCTTATCCCTTAACCATGTCA  
CTT--TTGACC--ACCTTGACCTTGTC----CAAAGAAAATACCAGTGG-----  
-----  
-----  
-----  
-----GCGAA---TCACCATGATTCC-TGCTAA  
CAGGAGTTCTAAAAGCATGAACCACAAAATATGCAGAAAATCTTGACGGAGGCAAGTA

>Mouse\_lemur

TATTACTTCAATAA-TATTTTGTGGCCACCAA-----CCA-CAGGATGGTGTGTGGGGAGG---AGGTTTCTTTCT  
AGAAA-----AAATGTCCCTAAAACCTATAACCTCTGGATACGTCCTCATATTCTCCCTTAACCATGCCACGT----  
-----ATAACC--ACCACAAGCTTGTC----CAAACATAATGCAAGTTT-----  
-----  
-----  
-----  
-----GCCGA---TCTTCATGACTTC-AGCTAG  
CTCATGTTCTGAAGAGCATAAACCCCGAAAGATGAAGTAAATCACAACTGAGGCAAATA

>Mouse

CATAGCTTCAATTA-ATTTTTTCATTATAACCAGTCACCCCCCAAAAACTATGTATTGGCAGCAGAGGTTTTCTTTCT  
GGATG-----CTATAA--ACA-CTGCAACTTGAGAGCACTTCTCTGGTTTTTCCATC-ATAACAGTACTG----  
-----ATCT-----CATG-----TTGACACTGCCACTGT-----  
-----  
-----  
-----  
-----  
-----  
-----GCAAT---TCATAAAG-TTGT-ATTTAA  
CTGAAGTTATGGAGGGTCCCAGCTATGAATTAT-AAGTAAACCATGACATGAGAAGCCT

>Dog

TATTGCTGAAACAATCTTTTTCTTTACTATCAG-----CCA-GAAAATGGTATGTGGGGAGAAAA---TCTCCTTCC  
AGAAA-----CAATGACCCTGAGAATATAACATCTAGATACTTCCATGTCTTCTTCATCAAAAATCTCACTTGACT  
ATCCCATCTCACTAGCCCACTCTGGGCTAGTCTCATAGATAATGCGGTG-----  
-----  
-----  
-----  
-----  
-----GCAAT---TTACTATGGTTCC-AGTAAA  
TTGGAGTTCTGAAAAGTACAACTATA-----TAAGCATGA----CCT

>Horse

TATTGCTAA-----TCTTTTAGTTACCATCAA-----CTA-GAAAATGGTGTGTGGGGAGAAGAATGTTTCCTTCC  
AGAAT-----TAATGACCCTAAGAATATAACCTCGGAACACTTCTTGCCTTCTTCATTACCATCTCACTT-----  
-----TCGACC-----CACAGATAATGCAGTCCCACAGGTAATGCAGGTG-----  
-----  
-----  
-----  
-----  
-----GTAAC---TCACTGTGATTCTAGAAAA  
CTGGAGTTCTGAGAGGTACAAACCAGA-----TAAGGACGA----AGT





TAAACATGTTTATCACTATATCAAGTGA

>Baboon

-----  
-----  
-----  
-----  
-----

-----tcca  
taggatttctgcac--gtcagctgtcctttgctttctgccatgagtggaagcagcctgaagctttcaccaaagtgcca  
gtcctt-tcagccagcagaa--ttgtta-gccaaataaagc-----tttttctttattaattaccg  
gcctcagttattcctttatagcaacactaaacagactaagaca---GGTTG---GTTATATGATCTCAGA--ATACAT  
TTTTTTTTCAGTGACATTTAGTTCTTAAGAAGGTAATCATCTTTTGTAGTAAGACATACAACAAAGGGTTCAAGTAAGCA  
TCAATAGATGAAAACGTAGTAGACACAAAAGCCTACTAGAAGAAACAAAAGTAACAACATATAGAAAACATTTCTAAA  
TAAACATGTTTATCACTATATCAAGTGA

>Rhesus

TTCTCAACATCGTTATTGGCATAACACTAATATC-AATACTTTGGCAAGCTAAACAACCTGTGATAACATCACAGAATA  
TCAGAACTTGGAAGCAAAGTTAGAG--AATCA--AACTCCTTTGA--AAGATGAGTAA---ACTG-AGACTC--AGAC  
GTTAAGAAGCTGACCAAGATCACCATGCATTAGTGGCAGA-A-G-----GAATCT-TT-TCTTCTCTCTATTGTGA  
TGTATCTTCTGGGTGTACACACACACA-----AC-CACTGGAGATTGGGTAAT---GGTTG---tgctgtag  
tttgaatatttgctccc-aaaacgtcatgttgaaatgtgatcctgata-ttggaggtgggggtaatgggaggtggt  
tttgtcatgggggcagaaccctccttgaatggcttgatg---tcctcctcatgctaagtgaggttctcactctatt  
-gcttccca-tgagggctgggtgtttaaagggagcctggcaactccctagctctctctctctctctctctctcttcca  
taggatttctgaac--gtcagctgtcctttgctttctgccatgagtggaagcagcctgaagctttcaccaaagtgcca  
gtcctt-tcagccagcagaa--ttgtta-gccaaataaagc-----tttttctttattaattaccg  
gcctcagttattcctttatagcaacactaaacagactaagaca---AGTTG---GTTATATGATCTCAGA--ATAAAT  
TTTTTTTTCAGTGACATTTAGTTCTTAAGAAGGTAATCATCTTTTGTAGTAAGACATACAACAAAGGATTCAAGTAAGCA  
TCAATAGATGAAAACGCAGTAGACACAAGAGCCTACTAGAAGAAACAAAAGTAACAACATATATAAAAACATTTCTAAA  
TAAACATGTTTATCACTATATCAAGTGA

>Marmoset

TTTTCAACATTGTTATTGACATAACACTAATATC-AATACTTTGGCAAGCTAAACAACCATGATAAGATCACAGAATA  
TCAGAACTTGGAAGCAAAGTTAGAT--TATCA--AACTACTTTT--AAGGTGAGAAA--AC--AGACTC--AGAT  
GTTAAGAATCTGACCAAGGTCACAAATGTGTTAGTGGCAGA-T-GGACTAGAATCT-TT-TTTTTCTCTCTATTGTGA  
TGTATCTTCTGGACACACACACACACACACACACACTGAATATTGGGTAGT---GGTTG---tgccatag  
tttgaatatttattctcc-aaaacctcatgttgaaatgtgatcccaacg-ttggaggtggagggtagcagggcggtggt  
tttgtcatgggggcagaacccttcatgaatggcttggtg---tcctcctcatgct-atcagtgaaatctcactc-att  
-gcttccctatgagggctgggtgtttaaagggcagcctggcaactccctagctctctctctctctctctctcttcca  
tatgatttctgcacatgtcaactctcttttgcctttaccatgagtggaagcaacctgaagctttcatcaaagtgcca  
gtcctaacagccagcagaa--gtgtaa-gccaaataaacc-----tttttctttatacattacca  
gcctcagttattcctttatagcaacactaaactgactaagata---GGTTG---GTTATGTGTTACAGA--ATAAAT  
TTGCTTTCAATGACATTTAGTTCTTAAGAAGATAGTCATCTTTTAAAGTAAGACATATTACAAAGGGCTCAAGTGACA  
TCAGCATATGAAAATGTAGTAAACACAAAAGCCTACTAGAAGAAACAAAATAA-AAGATAGA-AAAACATTTCTAAA  
TAAACATGTCTATCACTGTGTCAAGTGA

>Tarsier

TTCTCCACCTTGTTATTGGCATGTCACTAATATC-AGTCCTCTGGCAAGCTAAACCATGCTGATTGTATCGCAGAATA  
CCAGAACGTGGAAGCAAATTTAGAG--TATGT--AATATCGTTTG--AAGATGAGGAA---ACTG-AAGCTCAGAGAT  
GTTTTCAAAGCTGCTCAAGATTACATATGTGTTTGTGG-----ACGGGAATAA-GT-T-----TCTCTGTTCTGG  
TGTGGCTTATGGG-----CACACA-----AC-CACTGAAACCTGGATAGT---GGTCG---tgctatag  
tttagatgtttgtcacca-caaatctcatgttgaaatgtgatcccagagttggagatgggggtctaagggagggcgtt  
tggctcatagggacagatccgtcatgaatggcttggtg---ccttctcattctaagtgagtgattctcactgtatt  
-agttccat-tgagagctgggtgggcaaaagg--gcctggtatctccca---ttctctctctctctctctctctctctg  
tgtgatctctgcacacgcctgttacccttccctttgcccctgagtggaagcagcttgaagccctcaccagatgctca  
cattc-----cagcagaa--ttgtga-gccaaataagcc-----tttttctttataaactttcca  
gtctcagctatttcttttgcgaatagtgaaacagactgaaaca---GGCAG---GTTATATGATCACAGA--ATAAAT  
TTGCTTTTCAGTGACATTTAGTTCTTAAGAAGGTAATCACCTTTTGTAGTAAGAAATAAAAACAAAGAGCTTAAATAAGCA  
CCAGTATGTGAAAATGTAG--ATACAAATGCTTGGTAGAAGAAGAAAAAAGAAAAAGATAGA-CAAATATTCTAAA  
TAAACACTTTTATCACTGTATCAAGTGA







>Orangutan

AAAGGGT-AAAAAAA--TGA-AGGAAAATTGA-GAG--AAAAAGAAGATAAAAAG----AAGAAGCTGCCTTTGTTCA  
TTCTTAATTGAATAATTGCATTTTATATTACAGTTACCCTTTCTTTCTTTTACAAGTGGTACTGTCTGAGAAGG-AAAG  
AATCGGAGAACATAGATTTTTGAAAGCTAAAAG-----TTTCCTTATGGGTTATC---AATTC-----tg  
ctgtagtttggatgatggtttggttctccccaaaaatctcttgttgaaatttgatctccagtg-tggtggtggtggg  
aggtggggcctggtgggaggtggtttagtcttggaggtgaatccctcatgaatagattaatgccctccctcaggggtg  
aatacattctcactttcttagtttgtacagagttcttagttcttagttctcacttcttagttctta-gacagttggtt  
gttaaaaagagagcatggtacctcccttct-tctcttgttctctctctc---accatgtgatttct-tgcactcaggc  
tcccccttcaccttcacaatg-agtggacgtaatctgaggtctgtaccagatgcagatgccggtgccatgcttcta  
acagttttagaactataaggaaaataatcctctttctttataaatta----gcctcaggtaatcctttatagcaac  
atggaatagactaagata---AACTC---TGAAGCTCTTA-TTTTTCAAATGAAGAAAT-----TGAGGCATA  
ACGACGATACCGGAATGGCCAG-TGGCTTAAAATC---TAAGAGCAGATTAACCTTTCTGCAAATTTGATTGACAGTT  
ATCTTTAAATATATATTCTTTCTAGAAAAGCAGACACTGCTGCTTTTGTCTCATATAATGGTCTCTTTATTTCTATC  
GAGTCTCTCCAATGTGACAGGAAGTGGTTTTCTAAAGCTATGATTA-ATAGCCTCTATGCTTTGTGCTTTGCACCAC  
AACTACAATGCAGGGAACAATACTCTAGTGCCTCACAGAGTTTCTGAGCCTCCCACGGCTACTAATTTACTATGAGG  
GAGTAGTTTCGAAGCTCAAAAAGATTAGATTCTTCTTTATTATATCAGTATCCTTTTAT-TT-TGTTAACCTAATGCC  
TTATCATTCCACCATTATACTTCTTTCTTTCTTTTATACCCAAAGTCTTAAAATAAG-TAGTGTATGCTTACCA  
CCTCC

>Baboon

AAAGGGT-AAAAAAA--TGA-AGGAAAATGGA-GAG--AAAAAGAAGATAAAAAGAAGAAAGATTGCCTTTGTTCA  
TTCTTAATTGTATAATTGCATTTTATATTATAGTTACCCTTTCTTTCTTTTACAGGTAGTACCATCTGAGAAGG-AAAG  
AATCAGAGAACACAGATTTTTGAAAGCTAAAAG-----TTTCCTTATGGGTTATC---AATTC-----tg  
ctgtagtttggatgatggtttggttctccccaaaaatctcttgttgaaatttgatctccagtg-tggtggtggtggg  
aggtggggcctggttaggaggtggttggg-----tcatgaatagatcaatgccgtccctcaggggtg  
aataaattctcactttcttagttcttagagagttcttagttctcagttctcacttcttagttcttg-gagagttgctt  
gttcaaa--agagcatggtacctcccttct-tctcttgttctctctc---accatgtgatttat-tgcgctgagaa  
tcccccttcaccttcacaatg-agtggaggtaatctgagggcctgtaccagatgcagatgctggtgccatgcttcta  
acagtaggtagaactataaggaaaataatcctctttctttatacatta----gcctcaggtactcctttatagcaac  
atagaatagactaacata---AACTC---TAAA---CTCA-TTTTTCAAATGAAGAAAT-----CGAGGCATA  
AAGATGA-ACAGGAATGGTCCAG-TGTCTTAAAATCTGATAAGAGCAGATTAACCTTTCTGCAAAGTATTGACAGTT  
ATCTTTAAATATGTATTCTTTCTAGAAAAGCAGACACTGCCACTTCTGTCTCATATAATGGTAACTTTATTTCTAGA  
GAGTCTCTCCAATGTGACAGGAAGTGGTTTTCTAAAGTTATGATTA-ACAGCCTCTATGCTTTGTGA--GGCATCAC  
AACTACAATGCAGGGAACAATACTCTAGTGCCTCACAGAGTTTCTGAGCCTCCCACGGCTACTAATTTACTATGAGG  
GAGTAGGTTAGAAGCTCAAGAAGATTAGATTCTTCTTTATTATATCAATATCCTTTTAT-TT-TGTTAACCTAATGCC  
CTAACATTTCCACCATTATACTTCTTTCTTTCTTTTATACCCAAAGTCTTAAAATAAG-TGGTGTATGCTTACCA  
CCTCC

>Rhesus

AAAGGGTAAAAAAAA--TGA-AGGAAAATGGA-GAG-AAAAAGAAGATAAAAAGAAGAAAGATTGCCTTTGTTCA  
TTCTTAATTGTATAATTGCATTTTATATTACAGTTACCCTTTCTTTCTTTTACAGGTAGTACCCTCTGAGAAGG-AATG  
AATCAGAGAACACAGATTTTTGAAAGCTAAAAG-----TTTCCTTATGGGTTATC---AATTC-----tg  
ctgtagtttggatgatggtttggttctccccaaaaatctcttgttgaaatttgatctccagtg-tggtggtggtggg  
aggtggggcctggttaggaggtggttggg-----tcatgaatagattaatgccgtccctcaggggtg  
aataaattctcactttcttagttcttagagagttcttagttctcagttctcacttcttagttcttg-gagagttgctt  
gttaaaa--agagcatggtacctcccttct-tctcttgttctctctc---accatgtgatttct-tgagctcaggc  
tcccccttcaccttcacaatg-agtggaggtaatctgagggcctgtaccagatgcagatgctggtgccatgcttcta  
acagtaggtagaactataaggaaaataatcctctttctttatacatta----gcctcaggtactcctttatagcaac  
atagaatagactaacata---AACTC---TAAA---CTCA-TTTTTCAAATGAAGAAAT-----CGAGACATA  
AAGATGA-ACAGGAATGGCCAG-TGTCTTAAAATCTGATAAGAGCAGATTAACCTTTCTGCAAAGTATTGACAGTT  
ATCTTTAAATATGTATTCTTTCTAGAAAAGCAGACACTGCCACTTCTGTCTCATATAATGGTATCTTTATTTCTAGA  
GAGTCTCTCCAAGGTGACAGGAAGTGGTTTTCTAAAGCTATGATTA-ACAGCCTCTATGCTTTGTGA--GGCATCAC  
AACTACAATGCAGGGAACAATACTCTAGTGCCTCACAGAGTTTCTGAGCCTCCCACGGCTACTAATTTACTATGAGG  
GAGTAGGTTAGAAGCTCAAGAAGATTAGATTCTTCTTTATTATATCAATATCCTTTTAT-TT-TGTTAACCTAATGCC  
CTAACATTTCCACCATTATACTTCTTTCTTTCTTTTATACCCAAAGTCTTAAAATAAG-TGGTGTATGCTTACCA  
CCTCC

>Marmoset

GACTGGT--AAAAAC--TGA-AGGAAAATGGA-GAGGAAAAAGAAGGTAAGATGAAGGAAGAAGCTGCCTTTCTTCA  
TTCTTAATTGTATAATTGCATTTTATATTACAGTTACC---CTGTCTTTACAGGTGCTAGTGTCTGAGAAAA-AAAG





-----AACTC---CAAACCTCC----TTTCACAGGTGAAAAAAT-----TGAGATGTG  
AAGATGATACAGGAGGAGTCCAG-CGGTTTTAAATCTGATCTTGGTGCATTAA----TTGTGAAAGATTTTGACAGTT  
ATCTGAAAATTTATCTTTCTTCTAGTAAGGCAGACACTGCTCCTTCTGTTTCTTATAATGGTATCTTTATTTCTGGG  
GAGTCTCTCCAATGTGACAGGAAGTGCTTTTCTAAAGCTATGAATA-ATAACCTCTCCGCTTTGTCA--GGCGCTGC  
AA-TACAATGCAGCGAACAATACCCTGGTGCCTCACAGAGTTAATGAGCCTCCAAGGCTACTAATTTACTTTGAGG  
GAGTAGCTCAGAATTCAGGAAGATTAGATTCATCTTTATTATATCAGTGCCTTTTAT-TT-TGTTAACCTAATGCCC  
CTAACATTTCCACCATTATACTTCTTTCTTCTTTTATACTCAAAGCCCTT-ACAGGAG-TAGTGTGTGGGTACCA  
TCTCC

>Horse

AAAGTGG--GCAAAA--TGA-AGGAAAATGGA-AAG--AGA--AAGAGAAAACAAAGAGTGAAGTTTCTCTCTTCA  
TTCTTAATTACATCATTGCATTTTATCTTATGGACTCCCTACCTTTCTTTACAGGTGATGGTGTCTGAGAAGGAAAAG  
AATCAGAGAACATAAATTTTGAAGCTAGAAG-----TTTTCTTATAAATCATC-----  
-----  
-----  
-----  
-----

-----AACTC---TAAGCTCC----TTTTGTA---AAAGAAAC-----TAAGACATA  
AAGATGATACAGGAGTGGCTCAG-TGGTTTTAAACCTGATAATGGCAAATTAACTTTTTGGCTAAAGGATTTGACAGTT  
ACCTTCAAATATATCTTCTTCTAGAAAAGCTGACACTGCTGCTTCTGTTTCTGATAATGGTATCTTTATTTCTCGG  
GAGTCTCTCCAGTGTGACAGGAAGTGCTTTTCTAAAGCTATGAATA-ATAGCCTCTATGCTTTGTCA--GGCGCTGC  
AACTACAATGCGTGGAACAATACCCTAGTGCCTCCGCGGAGTTAATGAGCCTCCAAGGCTACTAATTTACTATGAGG  
GAGTAGCTTAGAATTCAGGAAGATTAGATTCCTTCTTTATTATATCAGTGCCTTTTAT-TT-TGTTAGCCTAATGCCC  
CTAACATTTCCCGCCATTATACTTCTTTCTTCTTTTATGCCCAAAGTCCAT-AAATGAC-TAGTGCATGCTTACCA  
CCTCC





ctttgccttctgttatgagtggaacagcccaacgacctcaccagaagccaagcagatgccagagtcacacttcctgt  
acagcctgcagaaccatgagccaaataaacctcttttctttacaaattactcagcctcagatattccttcacagaac  
cccaaatgggttaagaca---GATGC---TTTTCAGCTCTTTTTTTT-----CTCTGTGA-----TAGAAA--ATTT  
TGACTCTTGATATTTAAATAAAGGACCTAAAACCTGCCCTAGAAGGAGGTCTACAAAAGCAGAATGAGAAAGAAGCAA  
CAGGAAGGTATTCATTACTGATGATCATTAGTGATATCTAAGCATTGG-TTTA

>Marmoset

CCTACAAAACAAGCTTGTGCAGAGTTTTTAAAT-CTCCCTTCAACTGTACATTAATTGCAAAA-TAAATTATCAAATG  
TTTGCAT-AACACTCAACAATTTCTGT--TTAAATTGTAGCAATTTGTTATATAATTATGCTCTAAGAGGAGAGTGAT  
ACAAGATTTGCTTAGCTCTGAAGAAATATTTG---AATGC---tgctgtggg---ttgattgtttgtctcccc-a  
aacctcacactggaattcgatccctaagtgtggagtcaggcctagtaggaggtgtttgagtcacg-----  
-----ggcgccgtcctggtagtaataatgaat-----ctcactctgtaagtttctgggaga-ttggttg  
ttaaaaagagcccgccacctt-----ctgccac-----gtgatttctgcacgcactggctccc  
cttcaccttccgcatgagtagaacaagtcacagatctcaccagaagccagtaagatgcctgagtcattcttcctgt  
acagcctgcagaatgacgagccaaataaacctcttttctttataaattac-caggctcaggtattttttcacagcgat  
tccaaatgggctaagaca---GAGGC---TTTTCAGCTTTTTTTTTT---CTCTGTGA-----CAGAAA--ATTT  
TGATTTTTGATACTTAAATAAAGACCTGAAACTGCCATGGTTGGGGGTCTACAAAAGTACAAAGAGAGAGAAGCAG  
CAGAAAGGTATTCATTTCTGATGATCATTACTGATATCTAAGCATTGG-TCTA

>Tarsier

TCTACAAAACAAACTCTTGCAAGATTTTTAAAC-CTTCATCAAGCCATACTGTTATTGCAAAA-ATAAACATAAAATG  
CTTGTAACAATGCTGAGCAGTTTCTGTAATTAATTGTAATCATTGTTATATAATGATACTC----ATCAGACTGAT  
ACAGGATTCAGTTTTAACTTTGAAAAAATGATTTG---AATAC---tgctaaggt---tcagatgtttgccccctcc-  
aagcctggggtgaaatttgattcccggtgtcagagggcggaaccaatgggagggcgtctgg-tc-tggg-gagcacatc  
tctcataaa---cgggcatcatccccacagttatcagtgattt---ggtgctccatgagtagccccaagcgctggttt  
ttaaacgagctctggcacctcttt--cttctctgttgcctcctcttcc-ccacgtggctcttg--cgtactggctgcc  
cttgaccttccaccttgaacagaagaagcctgagggccttcaccagaagcgaaccagagaccacactgtgcttctgt  
aga-ccttcggagccgtgagccaaatacgcctctgcttctgggtaaacctgc-tgtcctcagctactcctccatggtgac  
-----acggacaacgtca---GGTGC---TTTTCAGTCTTTTTCTTTTTCTCACTCTTGGAACTCAGTAAAATTTTTTC  
TCACTCTTGGAACTCAAATAACAGACCT-AAACTGCCGTGGCAAGTTTTCTA-AAAAAGTAGAATGGG---GGGACAG  
CAGAAGAGTA-CAATTGGTGA--ATTACTGCTGATAGTCAAGCATTTTCTCTC

>Bushbaby

CCTATAAAAACAAGCTTGTACAAAGTTTATAAAC-TTCCCTTAAACCATACCTAATCTCAAAGTAAATTGTAAAATG  
TTTGTAT-AATACCGAGCAATTTTTGTAA-TTAATCATAGTAATTAGTTATATAATTAGACTTTAAGAGTAGATTGAT  
--AAGATTTAGTTTAGCTTT-AAAAAATTACTTG-----  
-----  
-----  
-----  
-----  
-----  
-----GATGC---TTTTCAATTTTTAAAT---TCTCTTCAA-----TAGGAA--TGTT  
TCACTCTTGATATTCAAATAATAGACATAAAACTGCCATGGTGAAGTGTACATTAAGTACAGTGGGAAAGA----A  
CAGAAAAGTA-TAAGTGGTGA--ATCATTACTAATATTTAAGCACATCCTCTA

>Mouse\_lemur

CCTACAAAACAAGCTCGTGAAGTTTTAAAT-CTCCCTTAAACCATATCTTAATTGCAAAAAGTAAATTATAAAATA  
TTTGTAT-AATACTGAGCAATTTCTGTAATTTAATTATAGTAATTAGTCATGCAATTATATTCTAAGATTAGATTGAT  
--AAGATTTAGTTTAGCTTT--AAAAATTATTTA-----  
-----  
-----  
-----  
-----  
-----GATGC---TTTTCAATTTCTTTTTCT---ACTCTTCAA-----TAGAAA--TTTT  
TAACTTTTTGATACCTAAATAACAGACCTAAAACCTACCGTGGTGGAGTGTCTATGAAAAGTATGGTGGGTGAGAG---G  
CAGAAGGATA-CAAGTAGTGA--ACCATTACTAATATTTAAGCATTTTCTCTA

>Horse

CCTACAAAACAATGTTGTGCAAAGCTTATAAAGTCCCCCTTAAACCATTCTTAATTGCAGAAGTAAACTATAAAATG  
TTTGTAT-AATACTGAGTAGCTACTGTAATTAATTTTCATAATTTTAAATGTAATTAAGTATGATCAGATTAGATTGAT  
ACAAGATT-----AGAAAATCACTTG-----

-----  
-----  
-----  
-----  
-----  
-----  
-----GATAC---TTTTCACCTTTCTCTAT---TCTCTGCAA-----AAG-----  
--AATCTTTATACTTTAATAACAGACCTAAACTACTGTGATGAGGTATCTCCAAGAGTAGAATAGAAGAGAA---G  
CA-AAAGGTG-TAACTAGTTA--ATCATTACTGATTT--AAGTGTTTCTTCCG



```

-----TCTCAGGCTCAGAAATCTCTCTCAC--TACTCCACAGATTATGAAATGCATCCTGACTCAATGTTTTGT
CCACATG---C-----tgatacagtttgaatatttgggtcctccaaatcctatggtgaaatttgatcaccaatggt
agaggtggggactggtgggaggtggttggatcataagagcggatcccttatgaatggggtgggtgccatccttgaggta
atgagtgagctcttgctctggttagttcccatgagatttgattgttaaaaagaacatagcactttccttctctcttca
atctctctccctctccttctcctcctcctcctcctcctgcatgtgacaaatctgctccccttttgcttctgcatgattg
gaagcttctgaggcctt-accaggagcaga-----tactggtgccatgcttcttttgagcctgcagaatggtaagc
caaatatacttc-ttttctttgtaaataaccagcctcaggtactccttctatagcaatacaa--atggattaagaca-
--CTGTC---CCT-GATGATCCAGACTGCTCCATGTGTGCAATTGACTCCTGCTCATGCTGCAGCTTCCCTTTGCTCA
GAATGTCTTTCCAGTGGCCCTTTTCTTCTGATGTCTACCACGGACACGCCTACTCATCTTCCAAGTCTAGTCACTAG
TCACCTACATTTCAAACCTTTA
>Tarsier
GAATTGTA CTCTTTAAATGGATGAATCATATAGTATATGGATTGTGTTTCAATACA--TGTTAAATAAATGAAAA-T
TAAAAAAAAAACTTCCAGTGACTTACACAATCAAATCCAACTTGTCTTACCCTAATCTGCCCTCTATGTGGAGCTGG
CTTCATGTTTCGCATGCTTAGAAATACCTTATCAGTGCCTCCACAAATTATGCAGTCAGCTCTGACTCGGAGTTTTGT
TCACATG---CTGTT---tgatagagtttgaatacttgctcctcctcagatttcatggtgaaatttgatc-cctgtatt
agaggtggggcctggtgggagatataatgggtcatg-----ggatcctttataattgacttgggtggtgctgaggta
atgactgggctcttattctgttaactcctgtgggatcaggttggtaaaaagaaactggcactttccttctctctctc-
-----tctctctctggttgcctcctcctcctcgggtcatgtaacatgccagcttccccttcacctactgccac-attg
gaagcttcagaagccttcactagaagcaga-----tgctggcaccatgcttcttgtacagcctgcagaactgtgagt
caataaacctctttttctttataaactaccagcctcaggtatgcctttatagccatgcag--atagattaagata-
--CTGTT---CCT-GATGTTCCAGACTGTTCTATGTGTGTAATTGATTCCTGCTCATGGTGCAAATT-TCTTTGCTTA
GAATGTCTTTCCCAATGGCCCTTCTTTCCAAGGTCTGTATGCAAACACTACTCATCTTCCATGTCTGATCACTGA
TCACCCCTATTTCAAACCTTTA
>Bushbaby
-----TGGGTGAATTACATGGTATGTGAGTTTTATCTGGATAAAGCTGT-----TAAGTGAGAA-C
A---TAAAC-ACCTTTAGTGACTTGCACAATAAAGTCTAAACTCATCACACCCCCTCTGGCCTCTGTGCAGG-CTGA
CTTTGTGACAGCCTGCTCACAATGCCCATCACTG-----TGTAATCTGTCTGACTCAATGTTTTGT
CCACGTG-----
-----
-----
-----
-----
-----
--CTGTC---CCT-GATTTTCCAGCCTGGTCCATGTGTGCTGTTGACTCTTGCTCATGCTGTGGCTT-CCTTTGCTCG
GAATGTCTTTTCTAACAGCCCCTCCCTTCCAGGCCTGCCAAGCAAATATCTATCCCTCTTTCAAGTTTGTTCATTGG
TCACCTCCACTTCAAAGCCTTTG
>Mouse_lemur
GAATTTTACACTTTAAATGGATGAATTATATGCTGTGTGACTTGTATCTTGATAAAGCTGT-----TAAGTGAAAA-T
T---TTAAA-ACCTTTAGTGA-----CTAAGCTCATCACA-CCCCTCTGCCCTCTGTGCAGGCCTGG
CTTCCGGCCCCCTGCTCAGAAATACCTCGTCACTGCTCTGCA---ATTATATAATCAGTCCTCACTTAAAGTTTTGT
CCACATG-----
-----
-----
-----
-----
--CTGTC---CTT-GACATTCCAGACTGTTCCCTTGTGTGCAATTGACTCTTGCTCATGCTGTGGCTT-CCTTTGCTCA
GAATGTCTTTTCTCAACAGCCCCTTCCCTCCTCGGTCTGCCAGGCAAACACTACTCATCTTGCAGGTCAATTCAGTGG
TCTCCTCCACTTCAAAGCCTTTA
>Dog
GGATTGT-AACTTTAAATGGATGAATCATGCTGTATTTGAATTATATATCAATAAAGGCGT-----TTAAATAAAAA--
-----TAAGAACCCTTCCAGTGATCTACTCAATAAAGCTCAAACAAATTTACCCCATTCTGTACTTTCTGCAGGTCTGG
CTTCATACT---GGCTCAG-----TGTAATCAGTCTTGACTTGTATGTTTCAT
TCACATG-----
-----
-----
-----
-----

```



## Marker M66

>MSTB1

```
-----  
-----  
-----  
-----tgctatagtttggatg-----tttgtccc-----ctcc-----  
--aaacctcatggttgaaatttgatccccagtggttgagggtggggcctaatgggaggtggttgggtcatgggggaggat  
ccctcatgaatagattaatgccctccctcgggggtggggatgagtgagttctcactctattagttcccgcgagagctgg  
ttgttaaaaagagcctggcacctccctcctcctcctc-----ttgcttcctcctcctcgccatgtgatctctgcacacgc  
cggctccc-cttcaccttcggccatgagtggaagcagcctgagggcctcaccagaagcagatgctggcgccatgcttc  
ttgtacagcctgcagaaccgt-gagccaaataaacctcttttctttataaattaccagcctcaggtattcctttata  
gcaacacaaaatggactaagaca-----  
-----
```

>Human

```
CTACTTGCTAGCTGTGTGACTGAGGGATACTTACCTAACCTCTCAGTGCCTCAATCTCTCTTTCTGTAAAATGCCAACG  
TTGTGATGCTGTGATGATTAACCTACACACTTAGAATACTGCCTGGCACACTGGACACACTACTTAAATACCAGCTACT  
ATTCTGTGTAGCTGGTATTGATGCTTGTTTTGTAGTCACAATAATGACAGCAGCAAGAGTAAAGGGAGAAGATATAAG  
G---AATAG---tgctatgggttggatgatgattcatttggccc-----cct-acccc-----  
--aagtctcctggttgaaatttgattcttaaatattggaggcggggcttgggtgggaggtggttggatcatgggggagat  
gactcatgaatggcttgggtgccattcttaaaaagaatgagtggtt-----tctcactcttagttcccacaagagctga  
ttgttaaaaagagcctggcacattctcctcctcctc-----ttacttcttctcactgtatgatctctgcacacag  
tgcctctc-ctgtgccttctactatgagtggaagcagcctgagaccctgagcagaaacagatggttggatccatgcttc  
ttgtacagcctgcagaaccat-gagccagataaacgtattttctcataaattaccagcctcaggtattcctttata  
gccacacaaa-tggactaaaata---A-TAG---AAAGAAATTAATGGCACTGCCCAAAGTAACATCTCTCTTAAG-A  
AAGGAAATAAAATAGTGTATTTAAAT-----AACCCAGATATATTAAGAATTTAATAATT
```

>Chimp

```
-----  
-----  
-----  
-----  
-----ggtggttggatcatgggggagat  
ga-tcatgaatggcttgggtgccattcttaaaaagaatgagtggtt-----tctcactcttagttcccacaagagctga  
ttgttaaaaagagcctggcacattctcctcctcctc-----ttacttcttctcactgtatgatctctgcacacag  
tgcctctc-ctgtgccttctactatgagtggaagcagcctgagaccctgagcagaaacagatggttggatccatgcttc  
ttgtacagcctgcagaaccat-gagccagataaacgtattttctcataaattaccagcctcgggtattcctttata  
gccacacaaa-tggactaaaata---A-TAG---AAAGAAATTAATGGCACTGCCCAAAGTAACGTCTCTCTTAAG-A  
AAGGAAATAAAATAGTGTATTTAAAT-----AATCCAGATATATTAAGAATTTAATAATT
```

>Baboon

```
CTACTTGCTAGCTGTGTGACTGAGGGATACTTACCTAACCTCTCAGTGCCTCAATCTCTCTTTCTGCAAAATGCCAATG  
TTGTGATGCTGTGATGATTAACCTCCACACTTAGAATACTGCCTGGCACACTGGACACACTACTTAAATACCAGCTACC  
ACTCCTATGTAGCTAGTATTGATGCTTGTGTTGTAGTCACAATAATGACAGCAGCAAGAGTAAAGGGAGAAGATATAAG  
G---AATAG---tgctatgggttggatgatgattcatttggccc-----ccccaacc-----  
--atgtctcatggttgaaatcgattcttaaatattggagggtggggcttgggtgggaggtggttggatcatgggggagat  
gactcaagaatggcttggatgccattcttaaaaggagtaagtggtt-----tctcactcttagttcccacaagagccga  
ttgttaaaaagagcctggcacattctcctcctcctcctcctccttacttctcctcctcactgtatgatctctgcacacag  
tacctctc-ctgtgctttccaccatgagtggaagcagcctgagaccctcaccagaagcagatggttggatccatgcttc  
tcatacagcctgcagaaccat-gagccagataaacatattttcctcataaattaccagcctcaggtattcctttata  
gccacacaaa-tggactaatata---AATAG---AAAGAAATAATGGCACTGCCCAAAGTAAAGTCTCTCTTAAG-A  
AAGGAAATA-----GTGTATGTAAAT-----AATCCAGATGTATTAAGAATTTAATAATT
```

>Rhesus

```
CTACTTGCTAGCTGTGTGACTGAGGGATACTTACCTAACCTCTCAGTGCCTCAATCTCTCTTTCTGCAAAATGCCAATG  
TTGTGATGCTGTGATGATTAACCTACACACTTAGAATACTGCCTGGCACACTGGACACACTACTTAAATACCAGCTACC  
ACTCCTATGTAGCTAGTATTGATGCTTGTGTTGTAGTCACAATAATGACAGCAGCAAGAGTAAAGGGAGAAGATATAAG  
G---AATAG---tgctatgggttggatgatgattcatttggccc-----ccccaacc-----  
--atgtctcatggttgaaatttgattattaatattggagggtggggcttgggtgggaggtggttggatcatgggggagat  
gactcaagaatggcttgggtgccattcttaaaaggagtaagtggtt-----tctcactcttagttcccacaagagccga
```







Marker M68

>MSTB1

-----  
-----  
-----tgctatagtttggat  
gtttgtcccctccaaacctcatgttgaaatgatccccagtggtggaggtggggcctaagggaggtgtttgggtca  
tgggggcggtaccctcatgaatagattaatgccctcccctcgggggtggggatgagtgagttctcactctattagttccc  
gcgagagctggttgtaaaaagagcctggcacctccctc--ctctctctcttgcctcctctctcgcctatgtgatctct  
gcacacgcccggctccccttcaccttcgcatgagtggaagcagcctgagggccctcaccagaagcagatgctggcgcc  
atg--cttctgtacagcctgcagaaccgtgagccaaataaacctcttttctttata-aattaccagcctcaggtat  
tcctttatagcaacacaaaatggactaagaca-----  
-----

>Human

TCTATCAAGAGTAATACAGGCATCTAGGACAGCACTAGAGCCCTGGCCATGGCACCAGAAATGTAAACCTCTCATTGA  
GGTGGATACTTGAAGCGCAGTGAGCTCGAAGAA-----CCTCAGCACATTCTCCTTCTGCTGGACCTTGGAC--  
---ACCCTGTTTTAGACCTGAACCTCCT-GTTCCTTGAAGGCCTTTGGATCA---CACTC---caatatggtttggat  
atttgttccccttcaaatctcatgtcaaaatgatcctcaatgctgaagatgggacctagtggaggtgtttaggttg  
aggggttggattcctcatgaatagattagtgcctcccctcaggggtgagtggt-----gttcttactctgtcagttctc  
attagatctgattgttaaaaagagcctggtgccttctcc---ctctctcttgcctcctctcttgcctatgtgatgct-  
-----ggct-cgctttgccttctgcatgagtagaagcttctgaagccctcaccagaagcagatgctggcccc  
atg--cttctgtacagcctgcagaaccatgagccaagtaaa--c-ttttctttacacaatt-ctcagcctcatatat  
ttatttatagcaacacaaaatggactaagaca---CACCC---CTTACCCATGTTAATTTAGAAGAGCTGATGCTAAC  
ATCACTGCTGGGAAGATGCACCTTAGGTCATGCAGTGAGCTACTTT-----AGACCCATA  
AATACTTGATACTTGGCAGTAGCTCTTGTCTGGATTATCAA-GAAGTTTATGGAGAGTCTGGGAGCCTCTGAGATG  
GTACCCA

>Chimp

TCTATCAAGAGTAATACAGGCATCTAGGACAGCACTAGAGCCCTGGCCATGGCACCAGAAATGTAAACCTCTCATTGA  
GGTGGATACTTGAAGCACAGTGAGCTCGAAGAA-----CCTCAGCACATTCTCCTTCCGCTGGACCTTGGAC--  
---ACCCTGTTTTCGACCTGAACCTCCT-GTTCCTTGAAGGCCTTTGGATCA---CACTC---caatatggtttggat  
atttgttccccttcaaatctcatgtcaaaatgatcctcagtggtgaagatgggacctagtggaggtgtttaggttg  
aggggttggattcctcatgaatagattagtgcctcccctcaggggtgagtggt-----gttcttactctgtcagttctc  
attagatctgattgttaaaaagagcctggtgccttctcc---ctctctcttgcctcctctcttgcctatgtgatgct-  
-----ggct-cgctttgccttctgtcatgagtagaagcttctgaagccctcaccagaagcagatgctggcccc  
atg--cttctgtacagcctgcagaaccatgagccaagtaaa--c-ttttctttacacaatt-ctcagcctcagatat  
ttattaatagcaacacaaaatggactaagaca---CACCC---CTTACCCATGTTAATTAAGAAGAGCTGATGCTAAC  
ATCACTGCTGGGAAGATGCACCTTAGGTCATGCAGTGAGCTACTTT-----AGACCCATA  
AATACTTGATACTTGGCAGTAGCTCTTGTCTGGATTATCAA-GAAATTTATGGAGAGTCTGGGAGCCTCTGAGAAG  
GTACCCA

>Orangutan

CCTATCAAGAGTAATACAGGCATCTAGGACAGCACTAGAGCCCTGGCCATGGCACCAGAAATGTAAACCTCTCATTGA  
GGTGGATACTTGAAGCACAGTGAGCTCGAAGAA-----CCTCAGCACATTCTCCTTCTGCTGGGCCTTGGAT--  
---ACCCTGTTTTAGACCTGAACCTCCT-GTTCCTTGAAGGCCTTTGGATCA---CACTC---cgatatggtttggat  
atttgttccccttcaaatctcatgtcaaaatgatcctcaatggtgaagatgggacctagtggaggtgtttaggtca  
tgggggttggattcctcatgaatagattagtgcctcccctcaggggtgagtggt-----gttcttactctgtcagttctc  
atttgatctgattgttaaaaagagcctggtgccttctct---ctctctcttgcctcctctcttgcctatgtgatgct-  
-----ggctccgctttgccttctgcatgagtagaagcttctgaagccctcaccagaagcggatgctggcccc  
atg--cttctgtacagcctgcagaaccatgagccaagtaaa--c-ttttctttacacaatt-ctcggcctcaggtat  
ttatttatagcaacacaaaatggacta--aca---CACCC---CTTACCCATGTTAATTAAGAAGAGCTGATGCTAAC  
ATCACTGCTGGGAAGATGCACCTTAGGTCATGCAGTGAGCTACTTT-----AGAACCATA  
AATACTTGATACTTGGCAGTAGCGCTTGTCTGGATTATCAA-GAAATTTATGGAGAGTCTGGGAGCCTCTGAGAAG  
GTACCCA

>Baboon

CCTATCAAGAGTAATACAGTCATCTAGGAGAGCACTAGAGCCCTGGCCATGGCACCAGAAATGTAAACCTCTCATTTA  
CATGGATACTTGAAGCACAGTGAGCTCGAAGAA-----CCTCAGCACATTATTCTTCTACTGGGCCTTGGAC--

---ACCCTGTTTTAGACCTGAACCTCCT-GTTCCTTTAAGGCCTTTGGATCA---CACTC---cgatatgggttggat  
gtttgttcccttcaaactctcatgtcaaagtttgatcctcagtggtgaagataggacctagtggaaaggtggttaggtca  
tgggggtggattcctcatgaatagattagtgccctccctcaagggtaagtga-----gttcttactctgtcagttccc  
attagatctgattgttaaagagagcctgggtgccttctcc----ctctctcttgctccctctcttgccatgtgatgct-  
-----ggctccccttgccttctgcatgagtagaagcttccctgaagccctcagtagaagcagatgctggcccc  
atg--cttctgtacagcctgaagaaccgtgagccaagtaaa--cttttcttccacacaatt-ctcaacctcaggtat  
ttctttatagcaacacaaaatggactaagaca---CACCC---CTTGCCCATGTTAATTAAGAAGAGCTGATGCTAAC  
ATCACTGCTGGGAAGATGCACTTAGGTTCATGCAGTGACCTACTTT-----AGACCCATA  
AATACTTGGCACCTGAGCAGTAGCTCTTGTCTGGGTTATCAA-GAAATTTATGGAGAGTCCTTGGAGCCTCTGAGAAG  
GTACTCG

>Rhesus

CCTATCGAGAGTAATACAGGCATCTAGGAGAGCACTAGAGCCCTGGCCATGGCACCAGAAATGTAAACCTCTCATTGA  
CATGGATACTTGAAGCACAGTGAGCTTGAAGAA-----CCTCAGCACATTATCCTTCTGCTGGGCCTTGGAT--  
---ACCCTGTTTTAGACCTGAACCTCCT-GTTCCTTGAAGGCCTTTGGATCA---CACTC---cgatatgggttggat  
gtttgttcccttcaaactctcatgtcaaagctctgatcctcagtggtgaagataagacctagtggaaaggtggttaggtca  
tggggatggattcctcatgaatagattagtgccctccctcaaggggtgagtga-----gttcttactctgtcagttccc  
attagatctgattgttaaaaagagcctgggtgccttctcc----ctctctcttgctccctctcttgccatgtgatgct-  
-----ggttccccttgccttctgcatgagtagaagcttccctgaagccctcactagaagcagatgctggcccc  
atg--cttctgtacagcctgaagaaccgtgagccaagtaaa--cttttctttacacaatt-cttagcctcaggtat  
ttctttatagcaacacaaaatggactaagaca---CACCC---CTTGCCCATGTTAATTAAGAAGAGCTGATGCTAAC  
ATCACTGCTGGGAAGATGCACTTAGGTTCATGCAGTGACCTACTTT-----AGACCCATA  
AATACTTGGCACCTGAGCAGTAGCTCTTGTCTGGGTTATCAA-GAAATTTATGGAGAGTCCTTGGAGCCTCTGAGAAG  
GTACCCG

>Tarsier

CCAATCAAGGGTGATACAAGAAGCTAGGAGAGAAGTGAAGCCA-AGCCACGATATAAGAAATACAAACCTTGGATTG  
AATGGATACTTGAAGCACAGTGAGTTCAAAGGG-----TCTCAGCACATTCTCCCTCTGCTGGGTTGTGGAC--  
---ACC-TGTTTTAGGTGTCAAGTTCCT-ATTTTTTTAAGGCCT-GAATCA---AACCA---tgttacagtttggat  
atgtgtctcctccaaactctcatgctgaaatgtgattcctaagtgtggacattgggcctagtgggaaggtggttgggtca  
tggggatggatccctcattcatagattagtgccctccctcaggggtgagtga-----gttctcagctctattagtgccc  
ctgagatc-acttgtaaaaagagtttagcaccttccctcccaactctctcttgctcc-----  
-----ctcttgcctccaccacga-tggaagcttccctgaggccctcaacagaagcaaatgctggtgccc  
atggaattccactacagcctgcagagccatgagccgagataacctcttactctgca-atta-cccaacctcaagtat  
tcttttagagccacacaaaacagactaagata---CACTC---CATTCTTGGGCTAATTAGGAAGAGCAAATGCTGAC  
G--ATCACTGGGAAAATGCACTTAGGTTCATGCAGTGAGCTACTTG-----AGACCTGTA  
ATTACTTGATGCTTGGCAATAGCTCTTGTCTAGATTCTCAGTGAATTTTATGGACAGTCCTGGGGCCTCTGAGAAG  
GTACTCA

>Marmoset

-----ATCTAGACATCTAGGAGAGCACTAGAGCCCTGGCTATGGCACCAGAAACGTAAACCTCTCATTGA  
AGTGGATACTTGAAGCACAGTGAGCCCGAAGGA-----CCTCAGCAGATTCTCCTTCTGCTGGGTCTGGGAC--  
---ACCTTGTTCTGGACCTGAACCTCCA-GTTCCTTGAAGGTCTTTCAGATCG---TACTC---tgatgtgggttggat  
gtttgttcccgcacaaactctcatgtcaaaatttgatccccaatggtgaagatgggacctagttagaaggtggttaggtca  
tgggg-tgatttctcatgaatagattagtgccctctcccaggggttagtga-----gttctcattctggttagttccc  
attagatctgggtgttaaaaagaacctgggtgacttctcc----ctctctcttgctccctctcttgccagggtgatgct-  
-----ggctcctcttgccttctgcatgagtggaagcttccctgaagccctcaccagacgagatgctggcccg  
atg--cttctgtacagcctgcagaactgtgagccaagtaagctcttttctttacacatta-ctcaacctcaggtat  
ttctttataacaacgcaaaatgaactaagata---CACCC---TTACCC-ATATTAATTAGGAAGAGCCGATGCTAAC  
ATCACTGTTGGGAAGATGCA--TAGGTTCATGCAGTGAGCTACTTT-----AGACCCATA  
AATACTTGACACTTGGCAACAGCTCCTGTCTGGATTCTCAA-GGAATTTATGGAGAGTCCTGGGAGCCTCTGAGAAG  
GTATCCA

>Bushbaby

CCTATCAAGGGTGATACAAGAGAGGATGAAGAGAATTAGAGCTCAGATCATGGCACTGGAAA--CACACTTCTGATTTG  
AATGGATGCATAAAGCACAGAGAGCTGAAAGGATCTGGAAGATCTCACCACATTCTCCCTCTGCTGGGTC-TGAAC--  
-----TCCCAGCCCTTGGACTCCC-ATTCCTTGAAGGCCT-GGATCA-----  
-----  
-----  
-----  
-----

-----TGCCC---CACGCCTAGGCTAGTTAAGAAAAGCTG-TGCTAAC  
ATGGCAGCTGGGAAGAGACACTTGGGT CATGCAGTGAGCTACTTG-----AGAGCTGAG  
CATACTTGATATTTAGGCAGTAGCTCTTGTCTGGGTTCCAGTGAATTTTATGGACAGTCCTGGAACTTCTATCAAG  
GTA----

>Mouse\_lemur

CCTATCAAAGATGATACAGGCAGCCAGAAGAGAATTGGAGCCTAGACCATGGCACCAGAAA--CACACCTCTGATTTG  
GATGTATTTGCAAAGCACAGCAAACCTCGAAGGATCTGGAAGGTCTCCACTCATTCTCCCTCTGCCGGGTA-TGAACCT  
CATACT-TGTCCCAGACCTGGAGCTCCT-GTTCCTTGAAGGGCCT-GGATCA-----

-----CACCC---A-TGCCTAGGCTAGTTAAGAAGAGCCGATGCTAAC  
ATTGCAGCTGGGAAGATGCACTTGGGT CATGCAGTGAGCTACTTG-----AGACCCCAA  
AATACCTGATGCTCAGGCAGTAGCTGT CATCTGGGTTCTCAGTGAATTTTATGAATAGTCCTGG-AGCCTCTAAGAAG  
GTA----

>Horse

CCTAGCAAGGGTGATACAGGAAAGTGGAAGAGA ACTGGAGTCCAGACCATGACCTCAGAAGTGCAAACCTCCCATCTG  
AACGGATCCTGGAAGCAGAGTGAGCTGGAAGGG-----TTTC--CATGCTCTGCCTCTGCTGGGTCTTGAAC--  
----CCCTGTTCCAAGCCTGGAGCCCCGCATTCTTGGGAAGCTT-GGATCA-----

-----CACCC---TATGCCAAGGTTAGCTAGAAAAGAGCTGATGATAAA  
GTCACAGCTGGGAAGATCCACTTAGATCATGTGGCAAGCTACTGGAGAATCCAGAAGGAGACAGGAGTGAACCCACA  
AACACTTGATGCTCAGGCAGTAGCTCTTGTCTGGGTTCTCAGCAAATTTTATAGACGGTCCTGGGAGCCTCTGAAAAA  
GTACTCA

## Marker M71

>MSTB1

-----  
-----  
--tgctatagtttggatgtttgtcccctccaaacctcatgttgaaatttgatccccagtggtggaggtg-gggcctaa  
tgggaggtgtttgggtcatggggcgga-tccctcatgaatagattaatgccctccctcgggggtgggatgagtgagt  
tctcactctatta---gttcccgagagctgggtgtt-aaaaagagcctggcacctccctcctctctcttgcct  
cctctctcgccatgtgatctctgcacacgccggctccccttcaccttcgccatgagtggaagcagcctgaggccctc  
accagaagcagatgctggcgccatgcttctgtacagcctgcagaaccgtgagccaaataaacctcttttctttataa  
attaccagcctcaggtattcctttatagcaacacaaaatggactaagaca-----  
-----

>Human

GAATATGGATATTTCCAAGAAAGGTGTTCTGTGAGATGAAGAGCGAGACTCTCCTGAGGATAGTCCCCAAGTCATTA  
T-----CTACTTTGGACATTGCCTTGTGAAGACAAGATATAGAGGACTACTGCCATCATATTGTGAGGC---GATGA-  
--gtatacagtttggatatttgtccccttacagatctcatgtgaaatctcatcttcagtggtggaggtgggggcctaa  
taggtggtgtttgggtcatggggagaggggttcccctgtgaatggccttggtgctgtcctcaaagt---aatgagtgaga  
tctagctctatgaacgagctcctgggagagccaattggt-aaaaataggctggcaattccttccccctttttcttctt  
ccttc-----ctgtcacaatgtgatgctgctctcctttaccttctgccatgagcgaagcttccctgaagccctc  
agcagatacagattcctgtgccatgcttctcatatggct---gaacctgagccaaataggcctcttttctttgtaa  
attgccagcctcaagtgttccctttatagcaacaca-aatggactaagaca---GATAG---GGAAGACAAAGAGTAT  
TGTAGAGAACTGACCCAACACCCTGATTTTCATTGAGC-CAGCACCAAATGTTAG-----ATCACCTATTGCAGTAC

>Chimp

GAATATGGATATTTCCAAGAAAGGTGTTCCGGTCAGGTGAAGAGCGAGACTCTCCTGAGGATAGTCCCCAAGTCATTA  
T-----CTACTTTGGACATTGCCTTGTGAAGACAAGATATACAGGACTACTGCCATCATATTGTGAGGC---AATGA-  
--gtatacagtttggatatttgtccccttacagatctcatgtgaaatctgatcttcagtggtggaggtgggggcctaa  
taggtggtgtttgggtcatggggagagggattcccctgtgaatggccttggtgctgttctcctaagt---aatgagtgaga  
tctagctctatgaacgagctcctgggagagccagttggt-aaaaatagcctggcaattccttccccctttttcttctt  
ccttc-----ctgtcacaacgtgatgctgctctcctttaccttctccatgagcgaagcttccctgaagccctc  
accagatacagatccttgtgccatgcttctcatatggct---gaacctgagccaaataaacctcttttctttgtaa  
attgccagcctcaagtgttccctttatagcaaaaca-aatggactaagaca---GATAG---GGAAGACAAAGAGTAT  
TGTAGAGAACTGACCCAACACCCTGATTTTCATTGAGC-CAGCACCAAATGTTAG-----ATCACCTATTGCAGTAC

>Orangutan

GAATATGGATATTTCCAAGAAAGGTGTTCCCGTCAGGTGAAGAGTGAGACTCTCCTGAGGATAGTCCCCAAGTCATTA  
T-----CTACTTTGGACATTGCCTTGTGAAGACAAGATATACAGGACTACTGCCATCATATTGTGAGGC---GATGA-  
--gtatatagtttggatatttgtcccacacagatctcatgttaaaatctgatcttcagtggtggaggtgggggcctaa  
taggtggtgtttgggtcatggagagaggattcccctgtgaatggccttggtgctgtcctcaaagt---aatgagtgaga  
tctagctctatgaacgagttcctgggagagccaattggt-aaaaatagcctggcacttccctccccctttttcttgcct  
ccttc-----ctgtcacaatgtgatgcttgcctcctttaccttctgccgtgagcgaagcttccctgaagccctc  
accagatacagatccttgtgccatgcttctcatatggct---aaacctgagccaaataaacctcttttctttgtaa  
attgcctagcctcaagtgttccctttatagcaacaca-aatggactaagaca---GATAG---GGAAGACAAAAGTAT  
TGTAGAGAACTGACCCAACACCCTGATTTTCATTGAGC-CAACACCAAATGTTAG-----ATCACCTATTGCAGTAC

>Baboon

GAATATGGATATTTCCAAGAAAAGTGCTCCTCTCAGGTGAAGAGTGAGACTCTCATGAGGGTAGCCCCGAGTCATTA  
T-----CTACTTTGGACATTGACTTGTGAAGACAAGATATACAGGACTACTGCCATCATACTGTGGTGC---AATGA-  
--gtatatagtttggatatttgtcccctacagatctcatgttaaaatctgatcttcagtggtggaggtgggggcctca  
caggaagaat---ggtcatgga-----ccttgtgaatgggttgggtgctgtcctcaaagt---aatgagtgaga  
tctagctctatgagcaagctcctgggagagctaattggt-aaaaatagcctggcacttccctccccctttttcttgcct  
ccttc-----ctgtcaccacgtgaagactgctc-cctttaccttctgccatgagtgaaagcttccctgaagccctc  
accaggtacagatccttgtgccatgcttcccataatggct---gaacctgagccaaataaaaactcttttctttgtaa  
attgccagattcaagtgttcttttatggcaacaca-aatggactaagaca---GATAG---AGAAGGCAAAGAGTAT  
TATAGAGAACTGGCCCAATACCCTGATTTTCATTGAGC-CAGCACCAAATGTTAG-----ATCACCTATTTCACTAC

>Rhesus

GAATATGGATATTTCCAAGAAAAGTGCTCCTCTCAGGTGAAGAGTGAGACTCTCATGAGGATAGCCCCGAGTCATTA  
T-----CTACTTTGGACATTGACTTGTGAAGACAAGATATACAGGACTACTGCCATCATACTGTGACGC---AATGA-  
--gtatatagtttggatatttgtcccctacagatctcatgttaaaatctgatcttcagtggtggaggtgggggcctca  
taggaagaat---ggtcatggg-----ccttgtgaatggccttggtgctgtcctcaaagt---aatgagtgaga



>Horse

GAGAATCGGTGCTTCTAAGAAAGATCCTCCTCTCTGATGAAGA----GCGTCTCATGAGGACAGTCTCTTCTTCATGT  
C-----CTGCTTTGAACACTGCCCTGTGAGGACAAGATATGCAGAGCAACTGCAGTCACCTTGTGATGT-----  
-----  
-----  
-----  
-----  
-----  
-----GATGG---GGAAAGTAACGGATAT  
TGCAGAGAAGATCAA-GAACGTCTTGATTTCACTGACC-CAGAATCAAACCTTGG-----ATCAACTACTTAGGCAC





AGGAGTATGTGTATGGCATGACTCAATTTTACCAGGGTCACTAATG-----CATCTGGAAAACCTGCTTCTT  
 >Rhesus  
 TGGC-----CTGTTGTGCTCACTCCAATCCATGCCATAGAGTGTGATGCCTACATGAAGGTCCACCA  
 CC----ACCAATGCCACTGTGCTTACCAGAAGTGCCTCACACCAGCTGCATCAATAAGAAGAAAATCTTTACATGCAG  
 ----CTGCCTTCTATGTGGGGTTG-GGG-GT-AAAGTCATCTTACACAGCACAAAGTATCTTAAACCTCAAATTAC-CT  
 CAAGGTATGGAAAATAG---ACATT---tgccatcagttggttcacttgacccttccaagtctcatggtgaaatttga  
 tcccccatggtgacagtgaggacttaatggaaggtggttgggtcatggaagtagatccctcatgaatagcttggtgcca  
 c-ctttg---tggaatgagtgagttctcactctattagttcccatgaggacaaattggt--aaaaagagcctggcac  
 ctccctccc--ctttcttgcctcctctgttaccatgtaatctctgcacatgccagctcccccttgccttctaccatga  
 gtggaatttctctgaggccctcaccagaagcagatgctggtgcccattctctatacaacctgcaaacaccataagcca  
 aataaatatc--ttctttataaattactcagcctcaggtattcctttacagtaacaca-aatggactaagatg---GC  
 ATC---TTTATAGATAGGAACCATTCTTGCCACAGAAAGATGCTCTTGATGAAGGCACATGAGAAGTGCAGACAGGA  
 GAAAACAGCAGATTGCAGCCACAGATTTCTGCCTCTCAGCTCATACTCATTTCGGAGGCATAAACCTATTGAGTAGGAT  
 GATGGGCAAACCT-CCCAGCATTATCTAAATTTCTGTCTCTCCCTTTGTCCCCGAATTGGTGTAGTCAACTTTCTTTA  
 AGGAGTATGTATATGGCATGACTCAATTTTACCAGGGTCACTAGTG-----CATCTGGAAAACCTGCTTCTT  
 >Tarsier  
 TGGCTTCTTC---TACTTAGCCTGTTGCGTTTACCCAGCCCATGCCACAGTGCATGATGCCTGCATGCAGGCCACCA  
 CC----AACAATGCCTCTG-GCCCACCAGAAGTGTTTTACACCAGCCGGATCAATAAGAAGGAAACCTTAACATTAAG  
 AAGGTCACCTTCTATGTGGGGATG-GGGTGT-AGAGTCATCTTATAAGGCATG-GTAATTTAAACCCCAAGTTACTCT  
 CAGTGTATGGAAAAGAG---GCTTT---tgctatagtttgggtggttgcctcctctaagtctcatggtgaaacttga  
 tccctagtgttggaggcagggctta-----gtggttgggtcacagggacaaacctgtcatgagtggttgggtgcca  
 t-cctca---aggaatgagtgagttctcactctattagttccctcaagagctggttgtt--aaaaagagtggtgcaa  
 ctccctgccc-----tcttgccatgtgatctctgcacatgctggccccctcttgccttccaccatga  
 gtagaagcttctctgaggccctcaccaggagcagatgcttgcacatgcttcttgtacagcccgcagaacctgtgagcca  
 aatcaacctc--tattct----ttaccagccccaggcattcctt-acagcaacaca-aacagaccaagaca---GC  
 ACC---CTCATAGCTAGGAATCACCTTTGCCATTAAGATGCTCTTACGTGAAGGTACGTGAGAAGTGCAGACAGGA  
 GGAAACAGCA-AGTGGAGCTGCAGATTGCCAGCCACAGCTCATACTCATTCTGAAGCATAAACCGAGTGCAGTAGATT  
 ACTAAGTAACCT-CCTAGAAGTACTAACTACTCTCTCTTTCTT---CCTTGAAGTGGTATAGTCAACTTTCTTTA  
 GGGAGTCTATGAAAACACGACTCAATTT-CACCAGGGCCACAGATG-----CAGCTGGAAAGATGCTTCTT  
 >Bushbaby  
 TGGCTCCTTC---TGTTAGCCTGTTGTTCTCATTCTGATCCAGGCCACAGGGCACAATGCCAATGTGAAGGTCCACCA  
 CCCACCAGCAATGCCACTGTGCCACCAGACATGCCTCACACCAGCCGGATCAATAAGGAGGAAATCTTTACCCGGAA  
 ----TGACCTCCAGGTGTGGATG-GGG-GTTAGAGTTATCTTATAAAGCACAGGTAATTTAAACCCCAAATCACCT  
 TGACCTATGGAAAACAG-----  
 -----  
 -----  
 -----  
 -----  
 -----GC  
 GTC---TTTATAGATAGGAATCGCCCTCTCCATGGAAAAATGTTCTCGCCTGGAGACACCTGAGAAGTGGGACCTGGA  
 GGGGAC--CGGAGGAAA-CGTGAGATTGCTGCTCTCCC--TCGGGCTCAGGCTAAAGCACGAACCTATGGAGCAGGAT  
 CCGGGGCAAACCT-CTGCACTCCATCTGAACTACTCTCTCCCTTTCT---CCCTGAG-TGGTGTAGCTGACTTGCTTTC  
 GGGTGTACATGGCTGGCATGATTCTCTTTTACCAAG-CCACTGATG-----CAACTGGAAAAATGCTTCTT  
 >Mouse\_lemur  
 CAGCTTCTTTCAATTGTTAGCCAGTTGTGCTTACTCCAATCCAGGCCATGGAGCACAACACCTATATGAAGGTCCACCA  
 CC----AGCAATGCCACTGTGCTCACCC-ATGTGCCTCCCACCAGCCAGATCAAGAAGAAGGAAACCTTTGCATGGAG  
 ----TCATCTCCAG-TGTGGATG-GGG-GTTAGAGTTATCTTATAAAGCACAGGTAATTTAAACCCCAAATCACCT  
 TGATCTATGGAAAATAG-----  
 -----  
 -----  
 -----  
 -----GC  
 ATC---TTTACAGGTAGGAATCACTTTACCATGGCAGGATGTTCTCACACGAAGGCACCTGAGAAGTGCAGACCCAAAG  
 GGAAACAGCA-----GGTTCCTGTCTCTC---T---GCTCATTCTAAAGCATAAAGCTATGGAGTGGGAT  
 GAGGGACAAACTCGCCAGCATGACCTAAAGTACTCTCTCCCTTCT---GCTTGAAGTGGTGTAGCTAACTTTCTTTA  
 CAGAGTGTGTGTAACGCATGACTCCATTGTACCAGG-CCACTGGTG-----CAACTGGAACAATGCTTCTT

>Mouse

TTGTGCTTTCTGATTCAT---CTGCTCTGTTTCATTAGAACCCATGCCACAGAGTACCATGTTTACATGAGGATCACCA  
CC----AATAATGACGCAGCTCTTGCCACAAGTACCCTCCACCATCT-----  
-----TTCCATGAGGATA-GGA-GTTAGAGCTGTCATATAAG-AAAATATAATCCCGACTTTAAGTTGCCCT  
C-----AGCAGAT-----  
-----  
-----  
-----  
-----  
-----GA  
GTC---TTTATAGATAGAACTACCCTGGCCGTGAAAGAGGCTCTAGC-TGAAAAACAAGGGGACAGCGACCAAGA  
GCACACAGTGAACAGGAGCAAC---TGATTTCTCTCAGCTCAGACTGATTCTCAA-----TAGGAT  
GGGGGCCACCT--TCTGGCACAAGC-AAAGGACTCTCTATC-----CCCCCTGAACTGGC-TGACTGACTTGCTGTA  
AGGAGCAC---TGTGGGGTGAGTCCATTAGTACCAGGGCAACTGGTT-----CAGCCAGAAAGAT---TTTT

>Guinea\_pig

TGGTCTCTCCTAATCCAC---CTGCTTGGCTTGTTTTCAATCTGTGCTGTGGAGCAGGATGGG-ATGGGAGGGTCAC-A  
CT---ATCAGTGTCACTGCACTTGTCA-GAGTGCCTTT-ACCAGCTGGACCAGCAAGAAGAAA-----  
-----AACTTTATGCAGGTGTGGG-GTTAGAATCATCTTGCAAGGAAAAAGTGATCTGAATCCCAAGTTACCCT  
T-----GAATATG-----  
-----  
-----  
-----  
-----AC  
-TC---TTTGTAGATAGGAATCATGCTTGCTATGGAAAGATGCTCCAACATAAAGGCACATGAGGTCTGATACCAAGA  
GGAAACAGCAGATGGGAGCAGCAGATGCCTTTTTCTCTCTCAGCCTCATTCTGAAGCATGAAGCTACTGAATAGATT  
GGGGTGCAA---CTTAGCATTATCTCAATGACTCTCTCTTT-----CTCCCTCAATTGGTACAAGTACTGATTCTCTTAA  
AGGAGTATGTATAAACAATGATTCCTTTTGAACAGGG-----

>Dog

TGGCATCTTTCTAATTAGT---CTGTTGTGCCTGGTCCAATTCATGCCATGGAGCATGATACCTATGTGAGGGTCCCCA  
AA---TG--ATGCCATTGTGTTCACTGAAAGTGCC-----TTCTTGTGAGG  
---TTACCATCTATGTAGGGATG-GGG-ATTACAGTCATCTTATAAGGCA-AAGAA-TTTAAATCCT-----  
-GAGGAGTGAATAATAT-----  
-----  
-----  
-----GC  
ATC---TTTACATATAGGAATCA-CCTTTACCTGG-AAGATGTTCTCATGTGAAGGCATATGGGAATTGAGAA-AGGA  
GGATACAGCAGATT-----CCTGTGTCTTAGCCAGACTCATTGTGAAGAATTAACATATTGAGTAGGAT  
GCTGGGTAAACTCCCTGGCATCATTTGAACTGCACTCTTTCTCTTTCTCCCATGATTTGGT--AGTTGACATTCTATA  
AGGTATA-----TGACATGAATCTATTT-CACCAGGGCTGCTGGTGTAGCTATGCAGCTGGAAAAATGATTCTC

>Horse

TGGCATCTTTCTAATTAGC---CTGTTGTGCCTGCTCCAACCCACACCATGGAGCACGACGTCTACATAAGGATCACCA  
CC----AC--ATGCCATTGTGCCCACTGAAAGTGCCCCACACCAGCA-----TTTATGCAGAG  
---TCACCTCCTATGTAGG-ATG-TA-----TCATCTTATAAGGCA-AGTAA-TTTAAACCCA-----  
-AAATAACGAAAAATAG-----  
-----  
-----  
-----GC  
ACC---TTTATACATG-----CATTGCCCAGG-AAGATGCTCTCATGTGAAGGCACATGAGAAGTGGAAACAGCA  
GGAAACAGCAGATTGGAATAGGAGAGTCTGTCTCTTGGCTCATACTCATTCTGAAGCATAAACGTATTGAGTGGGAT  
GGTGGGCAAACCTTGCTAGCAACACGCCCACTGCTCTCTCTTTCTTTCTTTCCTGAATTGGTGTACTTGGCTTTCTCTG  
AGGTATAAATGGATGACATGAATCTGTTTTACCAGGGCCACTGGTG-----CAGCTGGAGAAATGATTCTC



-----ATATATATTATAGTCTATGTAGACAAAAATGTTGACACCATTAA  
GGGTTATGTATATCACA--TGATTTAAGTATCCCAAGAATATT--TGTTAGTCCATTCTATGAGTATTATTATAGCCA  
GGATCATAAACAGAA---AAATTATATCTAATCCCAGGGAG----CCCTG---tgctaaggttttctactggttct-c  
cccaaatgtcatgtagagatttgat-ctcaatggtggaggtagagcctaataagaggtggttgggtcataggggaaga  
ttcttt-atgaacaga-----ttaatgccttcctttgcaggggat---agtaagtggattc  
ttattctactagttcccatgagagctggctggtttaaagagcccagcacctcccc----atctctctcttgcctccta  
tctcaccatcgtgatctctgcacatgctgggtccctttgccttccaccaggagtggaaacagcctgaatcactcact  
tgatgcagaagctgactccatgcttctgtacagtctgtagactg-taagccaaataaacctcttttctttataaatt  
accaagcctcaggtattcctttatagcaacacaaaatggactaaaaca---TCCTA---CAAACAGGAAAAAGTCTTG  
AAA-AAGCCTATAAGGA-----TAAAAT-----A-----GCTATGAG  
TTTCTTATTAAGACATGCATTCTCAAATGATTCAACTGTTTCCAGTAGTT-----TAGCTGCTGCAAAATAG  
ACCAGTAAAACCCAGATTTTTGGCTTAGAGAATTGTTTTGATGGGAAGAGTTGGGTTCTGA-TGTCAAGCCACCTT  
TACTTTGTGATATAAAACTTTCAAAC

>Baboon

GAAGTAATGTAATTTAAACTGATTCATGACAGATGCTCAACAGATGTTAA---TTGTTATTATTTCAAGTAAAAAT--  
----CATAATTATTGTTGCAGCTCCAGAAATATGGATGAACATACTGTCAATTTTGCCAAATTTAAAAATATTTATCTG  
CAGGTATTGAGGCTGGTTTTTATATATGTAG-TTTATAATATATATCTCATATATATA-----  
-----ATATATATGATAGTCTACGTAGACAAAAATTTTAAACACCATTAA  
GGGTTATGTATAGCACA--TGATTTAAGTATCC-AAGAATATT--TGTTAGTCAATTCTATGAGTATTGTTATAGACA  
GGATCATAAACAGAA---AAATTATATTTAATCCCAGGGAG----CCCTG---tgctaaggtttgactggttct-c  
cccaaatgtcatgtagaaatttgat-ctcaatgctggaggtg--cctaatagagaggtggttgggtcataggggaaga  
ttgttttatgaataga-----ttaatgccttcctttgcaggggat---agtggagtggattc  
ttactctattagttcccacgagagctggctggtttaaagagcccagcaccttccc----atctctcttttgcctccta  
tctcaccatcgtgatctctgcacatgctgggtccctttgccttccaccatgagtggaaacaggtggaatcactcact  
tgatgcagatgctgactccatgcttcttatacagtctgtagactg-tcagccaaataaacctcttttctttataaatt  
accagcctcaggtattcctttatagcaacacaaaatggactaaaaca---ACCTA---CAAACAGGAAAAAGTCTTG  
AAAGACGCCTATAAGGA-----TAAAAT-----A-----GCTATGAG  
TTTCTTATTAAGACATGCATTCCCAAATGATTCAACTGTTTCCAGTAGTT-----TAGCTGCTGTAAAACAG  
ACCAGTAAAATCCCAGATTTTTAGCTTAGAGAATTATTTTTAATGGGAGCAGTTGGGTCCCGA-TGTCAAGCCACCTT  
TACTTTGTGACATAAAACTTTAAACT

>Rhesus

GAAGTAGTGTAAATTTAAACTGATTCATGACAGATGTTCAACAGATGTTAA---CTGTTATTATTTCAAGTAAAAAT--  
----CATAATTATTGTTGCAGCTCCAGAAATATGGATGAACATACTGTCAATTTTGCCAAATTTAAAAATATTTATCTG  
CATGTGTTGAGGCTGGTTTTTATATATGTCA-TTTATAATATATATCTCGTATATATA-----  
-----ATATGTATGATAGTCTATGTAGACAAAAATTTTAAACACCATTAA  
GGGTTGTGTATAGCACA--TGATTTAAGTATCC-AAGAATATT--TGTTAGTCCATTTTATAAGTATTGTTATAGACA  
GGATCATAAACAGAA---AAATTATATTTAATCCCAGGGAG----CCCTG---tgctaaggtttgactggttct-c  
cccaaatgtcatgtagaaatttgat-ctcaatgctggaggtg--cctaatagagaggtggttgggtcataggggaaga  
tttttttatgaataga-----ttaatgccttcctttgcaggggat---agtggagtggattc  
ttactctattagttcccacaagagctggctggtttaaagagcccagcaccttccc----atctctcttttgcctccta  
tctcaccatcgtgatctctgcacatgctgggtccctttgccttccaccatgagtggaaacaggtggaatcactcact  
tgatgcagatgctgactccatgcttctgtacagtctgtagactg-tcagccaaataaacctcttttctttataaatt  
accagcctcaggtattcctttatagcaacacaaaatggactaaaaca---ACTTA---CAAACAGGAAAAAGTCTTG  
AAAGAAGCCTATAAGGA-----TAAAAT-----A-----GCTATGAG  
TTTCTTATTAAGACATGTATTCCCAAATGATTCAACTGTTTCCAGTAGTT-----TAACTGTTGTAAAACAG  
ACCAGTAAAGCCCAGATTTTTAGCTTAGAGAATTATTTTTAATGGAAGCAGTTGGGTCTCGA-TGTCAAGCCACTTT  
TACTTTGTGACATAAAACTTTAAACT

>Tarsier

AAGGTAATGTAATTTAAACTGATGCATGATATATGGCCAGCAAAAGTTAA---TAATTATTATTATGTCTGTAAAT--  
----TTCAATTATTGTACAGACCCAGAAATATGGATGAATATATTGCCATTTTGATAAATTTAAAATATTTATCTG  
CATGTGTTGAGGCTGGTTTACAATATATGTAT-TTT-TATTGCACATATTATATATGAGTG-----  
-----TGTTGTGTGTATATATATATGACATCC-----AGAAAAAATTTTAAATATCATTG  
AGGTTATATATGGCACACATGACTTAAGTATTC-AAGAATATT--T-TTAACTTATTTTATAAGCATTATTATGGTCA  
GGATCATTAAACAGAA---GAAGTGCATCTAATCCTAGGAAAA---CCCAG---tgctatggtttgaatggtt-tcc-c  
cacaatcctcatgtacaaatttgat-tccaatggtggaagtttggcctaatagagaggtatttgggtcat-ggggaaga  
tccttc-ttgaatagaaatgtctcctgtgggggaggggtggatggtgtctcctgtgggtgatggtgatgaatgaattc  
tactctattagctcccatgagagctgattggtttaaagagcctggtacctcccctaccccttctcttgccttcccc

tcttgacat-gtgatctctgcacatgcaggctctcctttgccttcctccaacagtggaagcaacctgaggacctttcc  
caacacagatgccagcagcatgcttcttgtagcagcctacagaacctgaggcaaacaaacttattttcttaataaatt  
accagcctcagatattcctttatagcaacac-aaatggactaagaca---TCCTG---CAA-CAGGGA-----  
----AAGTTTGTAGGA-----TAAAAT-----A-----ACGAGGAG  
TTTACCATTAAGGCATGCATTCTCTAACTGATTTGCCTATTTCCAGTAGTT-----TAGCTACCATAAAATAT  
ACCAGTGAAACCC-----AGTTGGGGCTTGA-TATCAAACCACCTT  
TG-TTTGCAATAAAAACTTCAAACC

>Bushbaby

AAATTAATGTAATTTAACTGATGCATGGTAGATACTCAGCAAATGTTAAATACTATTTTTATTTCAAATATTAAT--  
----TATTATTATTTTTGCAGATTTAGAAATACAGATGAAAATATTGTTACTTTGCCAAATTTAAATATACTTATATG  
CATGTTTTGAGGCTGGTTTATAGTACATGAAGGTTTGTGAGAAATATATACTGTAAATAAAGCGTGCAATTGCATACT  
ATTTTTAATTGCACACAACTTTATGGCTGTAATGTATCTGATAGTTTATGTGGACAAAAATTTAATATCATT-T  
CAGTTATATATGGCACT--TGATTTAGGTATTT-GAGGATATA--GCCAGCCTATCCTATGAATATTTTTATGGCCA  
GACTCATAAACAGAG--AAAGTATAACTAATCCAGGGAA-----  
-----  
-----  
-----  
-----

-----CACCG---CAG-TAAGGAAAAGTCCTG  
GAA-AAGCCTATTGGGAGGTGATAGGATCAGAGATGATCCAATAACAATTTTATATTGATCAGACGTCACACAAGGAG  
CTTCTCACTC-GGCATGTGTTCCCTGGATGATTTAGCTGTTTCCAGAAGTT-----CAGCTTCCGTAAAGCAC  
ACCTGTGAAACCCAGAATTCTATCTTAGCTGACTGTTTCTAACGGGAACAATTTGGTTTTGAATTTCAAACCTACCTT  
TACACTGGGACATAAAAACTTCAAAC-

>Mouse\_lemur

AAGGTGATATAATTTAACTGATGCATGGTCGATGTTCAACAAA-TGTTG---TTATTATTATTTCAAACATTAATAT  
AAGTTATAATTATTGTTGCAGATCCAGAAATATGGCTGAAAATATTGTAATTTTGCCAAATATAAACATATTTATATT  
CATGTATTAAGGCTGATTTACAGTATAGGTAGGTTTATGATATATATA-----  
-----ATAAATATATATGATAGTCTATGTAGACAAAAATTTTAAACACCATTT-A  
GGTTTATATATGGCACA--TGATTTAGATATTT-GAGGATATT--ATTAGCCTATTCTATGAATATTATTATGGCCA  
GGCTTATAAACTGAA--AAAATAAACTAATCCAGGGAA-----  
-----  
-----  
-----  
-----

-----CCCTG---CAA-TAGGAAAAGTCTTG  
GAA-AAGCCTATTGGGA-----TAAGAG-----A-----GCAAGGAG  
TTTCTCATTAAAGGCATGCTTTCCCTGAATGACTCTGCTGTTACCATTAGTT-----CAGCTTCTATAAAATGT  
ATCAGTGAAACCCAGAATTTTAGCTTAGACAAGTGTAAATGGGAACAATTTGGGTCTTGA-TATCAAACCACATT  
TACATTGGGATATAAAAACTTCAAAC

>Mouse

TTAATGATACATGGTAAGT-----ACATGTTAGGAAAAT---AC---TGATAATTATTTGAAATATAAAT--  
----TATGGTT-TTGTTAGAGATTCAGAAATATGGAGA-----TTGCCAACTTTCCCACTTTAAAAA-CTACTTGTG  
TTTTATGCTTATATCAGTTTATGATATATGTTGGCTTAGGATACATACAAG-----  
-----C--TAGTATATGTAGATAAACTTC-AACATCATTTAC  
AGCTTACATGAAATA----ATATAAGGCACAG-GAGGATGTT---TTTGTCTATTCTATGAGTACTATTATTGCCA  
GGCTCCTAAACAGAAGTAAATATAG-GC-ACTTTCAGGGCG-----  
-----  
-----  
-----  
-----

-----ACTTG---CA-GTAAGG--AAGCCTTG  
GGA-AAGCCTCCCGGGC-----TAGGGT--GGCA-----TTAATAAG  
CTCCTTCTTCCAG-TATGCCATCAATGAATTATTGAGCTCTTTCCAGCAGTT-----TGATAGATGTGAGCTCT  
GCCAGTTAAATCCAGAAATTTGGCTTATAGAATTGCTTT-GGTAAGAACATCTAGATTTGAG-AAGTAAATCACTTT

CAGTTTGAGATTATTAGCTTCAAACA

>Guinea\_pig

GTGACAATATATAATAGAT-----GCCTTGTAACCTTAAT---TA---TTATTATTGTTTGAAATGTAAAT--  
----TATGGTCATTATGATAGATTTAAAGATATAGATAA-TATATTGGCAGTTTGCATACTGAGGCAA-ATTTATATT  
CATGTCTTGAGGTATGTCTATAATACACATAGGTTTTATGATATGCAAAGTAT-----  
-----TATGTAGATAAAAACTTTTAATACCATCTAG  
AAATTATATATGACATA--TACTTTAAATATTA-AAGGACATT--ATTAACCTAATCCTTTTGCATTATTATTTCTA  
GGCTCATTAAACAGAA--AACAAAT-GCTAATTCTAGGGAT-----

-----CCTTA---AC-ATAGGC--GAGTCTTA  
AAA-AAGTTTATTAAGA----TAAGAAA-GGCA-----TCAAGGAG  
TTTTCT---TCAGTCATGTATTCCTTGAGTTAGT-AGCTGTTTCCAAAAGTTTCAGCTGCAAATTATATCAGTGCAATAT  
ATCAGTAAATTCAGAGAGTTTAGTATATAGAATTGCTTTTAATGCTAACAGCTAGGTTTTGG-AAGCAAATCGAATT  
TCCTTTGAGATACTAAACTTCAAATG

>Horse

AAGATAATGTAATTTAAATGGATGCGTGTTAGAT-----CCAAAT---A---TTATTATTATTTCAAATATAAAT--  
----TATGATTATTGTTCATAGATAGAGAAATGTGGAAGAATATATTCCAATTTTGTGAATTTAAAAATATTTATATG  
CATGTATTGAGGTTGGTCAATGGTATATATAGGTTTATAATATAT-----AT-----  
-----AGGATAGTCTATATGGACAAAATTTTAAACGTCATTTGA  
GGCTTATCCATGACACA--TTATTTAGGTATTC-AGTGATATTCTTGTTAGCCTATTCTATGAGTATTATTATGGCCA  
GACTCATAAACAGAAAAAGAAGTATATCTAATCCCAAAGAA-----

-----CTCTG---CAG-CAGGGCAAAGTCTTA  
GAA-AAACCTATTGGGA----TGAAATA-AACA-----GCAAGAAG  
TTTTCTATAA-GTCATGCCTGCCCTAAATGATTTCAGCTGTTCCAGTAGTT-----TG-CTGCTGTGAAATAT  
GC-----CAGAAGTTTTAGCTTAGAGAAGTCTTTTAATAGGAACAATTGGGTCTTGA-AACCAAACCTACCTT  
TACTTTGGGATACAAAACCTTCAA---

## Marker M74

>MSTB1

```
-----tgctatagtttgg-  
-----atgtttgtccctccaaacctcatggtgaaatttgatccccagtggtggaggtgg-ggcctaatgggaggtg  
tttgggtcatggggcggatccctcatgaatagattaatgccctccctcgggggtggg-----atgagtgagt  
tctcactctattagttcccgagag-----ctggttggttaaaaagagcctggcacctccctcctctct  
cttgcttctctctcgccatgtgatctctg-cacacgccggtccccctcacctccgccatgagtggaagcagcctg  
aggccctcaccagaagcagatgctggcgccatgc--ttcttgtagcctgcagaaccgtgagccaaataaacctct  
tttcttt-----ataaattaccagcctcaggtattcctttatagcaacacaaaatggactaagaca-----  
-----
```

>Human

```
TTTCAACTGGTGTTTACAGTGGAAAAATTTCTAAAGTTATAAACTGGAGGGAAAGAGAATTTGCAAAATTTGTTTTG  
AGAGAAAAG--AATTAGAGTCACAACACAGGAGAAGATAACTGGGTCATGAAA---CATGG---tgctatggttttga  
tctggttcccttgaccaccatgtctcatggtgaaatctgattcgcaatattggaggtgc-ggcctaatgggagggg  
-ttgggtcatgagtgtggatccctcatgagttagatgaatgccgtccctggggggcgagtggtgggggtggtgagtgagt  
tttctctc--ttagttccaagagagttccctagagagctggttggttaaaaagagcctggtacct--ttcccttctct  
cttgctttctctc--accatgtgatccctg-cacacaccggtgctcttcccccttgccatgagtggaaaaagtcta  
aggccctcaccagattcagatgctggtgccgtgc---ttcttatacagcctgcagaaccataagac-aataaacctat  
tctttt-aaaaaataaattaccagcctcagatgttccctttagcaacgctaa-caaatt---ata---CCTGG---  
CCACCAAATTTAGGGGACCC-----AGCAATTTAAATAAAAAAT  
TTAAAAAA-TACTCTTCTA-TTTTTATTGGATGAAATTACATATAGCCT--TATTTG
```

>Chimp

```
TTTCAACTGGTGTTTACAGTAGAAAAATTTCTAAAGTTATAAACTGGAGGGAAAGAGAATTTGCAAAATTTGTTTTG  
AAAGAAAAG--AATTAGAGTCACAACACAGGAGAGGATAACTGGGTCATGAAA---CATGG---tgctatggtttcga  
tctggttcccttggccccaccatgtctcatggtgaaatctgattcgcaatgttggaggtgc-ggcctaatgggagggg  
-ttgggtcatgagtgtggatccctcatgagttagatgaatgccgtccctggggggcgagtggtgggggtggtgagtgagt  
tttctctc--ttagttccaagagagttccctagagagctggttggttaaaaagagcctggtacct--ttcccttctct  
cttgctttctctc--accatgtgatccctg-cacacaccggtgctcttcccccttgccatgagtggaaaaagtcta  
aggccctcaccagattcagatgctggtgccatgc---ttcttatacagcctgcagaaccataagac-aataaacctat  
tctttt-aaaaaataaattaccagcctcagatgttccctttagcaacgctaa-caaatt---ata---CCTGG---  
CCACCAAATTTAGGGGACCC-----AGCAATTTAAATAAAAAA-  
TTAAAAAA-TACTCTTCCA-TTTTTATTGGATGAAATTACATATAGCCT--TATTTG
```

>Orangutan

```
TTTCAACTGGTGTTTACAGTGGAAAAATTTCTAAAGTTATAAACTGGAGGGAAAGAGAATTTGCAAAATTTGTTTTG  
AAAGACAAG--AATTAGGGTCACAACACAGGAGAGGATAACTGGGTCATGAAA---CATGG---tgctatggtttcga  
tctggttcccttggccccaccatgtctcttgggtgaaatctgatttgctatggtggaggtgc-ggcctaatgggagggg  
-ttgggtcatgagtgcggatccctcatgagttagatgaatgctgtccctggggggcgagtggtgggggtggtgagtgagt  
tttctctc--ttagttccaagagagttccctagagagctggttggttaaaaagagcctggtacct--ttcccttctct  
cttgctttctctc--accatgtgatccctg-tacacactggctgctcttccccgcttgccatgagtggaaaaagtcta  
aggccctcaccagattcagatgctggtgccatgc---ttcttatacagcctgcagaaccataagac-aataaacctat  
tctttt-aaaaaataaattaccagcctcagatgttccctttagcaacactaa-caaatt---ata---CCTGG---  
CCACCAAATTTAGGGGACCC-----AACAAATTTAAATAAAAAAT  
TTAAAAAA-TACTCTTCTA-TTTTTATTGGATGAAATTACATATAGCCT--TATTTG
```

>Baboon

```
TTTCAACTAGTGTTTACAGTGGAAACATTTCTAAAGTTATAAACTGGAGGGAA--AGAATTTGCAAAATTTGTTTTG  
AAAGACAAG--AATTAGAGTCACAACACGGGAGAGGATAACCGGGTCATGAAA---CATGG---tgctatggttttga  
tttgggttcccttggccccaccacgtgtca--ttgaaatctggtttcacaatgttggaggtgg-ggcctaatgggagggg  
tttgggtcatgagggcggatccctcatgagttagataaatgtcctccccggggcgagtggtgggggtggtgagtaagt  
tctcactc--ttagttccaagatagttccctagagagctggttggttaaaaagagcctggtacct--ttcccttctct  
cttgctttctgtc--accatgtgatccctg-cacacactggctgctcttccccgcttgccatgagtggaaaaagtcta  
aggccctcaccagattaagatgctggtgccatgc---ttcttacacagcctgcagaaccataagac-aataaacctat  
tcttta-aaaaaaaaata-cccaccctcagatgttccctttagcaacacaaa-caaatt---ata---CCTGG---  
CCACCAAATTTAGAGGACCC-----AACAAATTTAAAGAAAACAT  
TTAAAAAA-TACTCTTCTA-TTTTTGTCAGATGAAATTACATATAGCCT--TATTTG
```





>Guinea\_pig

CTTTAGCTAGAGTTTA-TACAATGAACTTCTGAAGTTATCCGACTGAAGGGAATGAGATTTTGAAAAATTTGTTTTG  
GAAGACAAAAGAATCAGAGCAGCAGAACAGAAG-GCATTATTGGGCTTTGAAA-----

-----CCAGG---  
TCACCAAATTTAGAGGATAC-----AATAATTTAAATGGAGATT  
T---AAA--AAATATCTTA-TCTCCATAGGATGAAATTATGTGTAGTTTTATTCTA

>Dog

TTTCAACTAGAGTTTATTGTGGTGAAATTTCTGAGGCTATCAGATTAGAGGAGAAGAGTTTTTGTAAAATTTGTCTTA  
GAAAACAAG--AATCAGAGCAAAAGTAAAGGGGAGGTAAC TGAAC TGGAAA-----

-----CCCGG---  
TCACCAAATTTAGAGGACATGATAATTTATTTTTTAATTTTTTCATTTTTTAATAAAAAGATAATTTAAACACAGATC  
TTTAAAAA-CACTATTCTA-TTGTAATAGGATGAAATTATGCCAAGCCT--TATTTT

>Horse

TTTCAACTAGAGTTCATCGTGGTAAAATTTCTGAGCTTATCAGACTGGAGAGGAAGAGCTTTTGGAAAATTTGTCTTG  
GAAGACAAG--AATCAGAGTAGAAATAAAGGAGGGCATAACTG-GGCTTGAAA-----

-----CTTGG---  
CCACCAAATTTAGAGAGCAC-----AACACTTTAAACGCAGATT  
TAAAAAAA-TATTTTTCTA-TTATAATTGGATGAAATTATGTACAGCTT--TATTTT

## Marker M75

>MSTB2

```
-----  
tgctatgggttgggatatgggttgggttgcctcccccacaaaactcatggtgaaatttgatccccaatgtggcagtggtggg  
aggtggggcctagtgagggtggttgggtcatggggcagatccctcatgaatggcttgggtgctgttctcatggtagt  
gagtgagtgagttctcactctcanragactggattagttctcgttaggaatggattagttcccatgagagtggttgg  
ataaagccaggatgccctcagggttgcctctttgcacg-----tgccacttccccttgaccttctctgcca  
ttatgatgcagcatgaaagccctcaccagaagcca-----gggcatgcccttgaacttcccagcctgcaga  
accatgagctaaataaacctcttttctttataaattaccagctctcaggtattctgttatagcaacacaaaatggact  
aagaca-----  
-----
```

>Human

```
TGATAGTCTATCCAGTTTGAATACATTTGTGAAGCAAATTCACAAATTGCGTATTATATCTTCTGG---AATG-G---  
tgct-tgggttgggatatgggttattgggtccccacaaatcttatgctgaaatttgatccctgggtggtggcaatattaga  
-tatatagcctgggtgggtggttgggatcatgagaatggatcgctaataatggcttgggtg-----  
-----  
-----tcc-ccagggttgccttctctcgca----catacttgcttctcctttgaccttctccgacatg  
ttttgactcatcacagaagacctcaccagaagccaagcagatgtaggagccatgcttcttt----cacagcctacaga  
acggtgagctaaataaacatcttttctttataaattactcagctcaggtattcttttatagtaacacaaaatggact  
aagaca---CATCA---TACTGTAA----AATAAAGGAAGA-----TTTTAAAAAGTGAATTAACATCCAGTT  
ACTCCATAGACAATTAGGAATAATTTGGGCAGCATGGTAACAGCCCCTGCACGGCATTGGGGATCCACTCCTGCTCTT  
TGAACCCAGAAGAACCTGAT-TCAAATTTGATTGACAACATGACCAGGG-TAGGATGCCTACAGCTGGGGTCTGGTTG  
AAATGAGATG-----GGATGATCAAAGCAGGTGATCTG-
```

>Chimp

```
TGATAGTCTATCCAGTTTGAATACATTTGTGAAGCAAATTCACAAATTGCGTATTACATCTTCTGG---AATG-G---  
tgct-tgggttgggatatgggttattgggtccccacaaatcttatgctgaaatttgatccctgggtggtggcaatattaga  
-tatatagcctgggtgggtggttgggatcatgagaatggatcgctaataatggcttgggtg-----  
-----  
-----tcc-ccagggttgccttctctcgca----catacttgcttctcctttgaccttctccgacatg  
ttttgactcatcacagaagacctcaccagaagccaagcagatgtaggagccatgcttcttt----cacagcctacaga  
acggtgagctaaataaacatcttttctttataaattactcagctcaggtattcttt----acacaaatggact  
aagaca---CATTA---TACTGTAA----AATAAAGGAAGA-----TTTTAAAAAGTGAATTAACATCCAGTT  
ACTCCTTAGACAATTAGGAATAATTTGGGCAGCATGGTAACAGCCCCTGCACACTGCATTGGGGCTCCACTCCTGCTCTT  
TGAACCCAGAAGAACCTGAT-TCAAATTTGATTGACAACATGACCAGGG-TAGGATGCCTACAGCTGGGGTCTGGTTG  
AAATGAGATG-----GGATGATCAAAGCAGGTGATCTG-
```

>Orangutan

```
-GATAGTCTATCCAGTTTGAATACATTTGTGAAGCAAATTCACAAATTGCGTATTATATCTTCTGG---AATG-G---  
tgct-tgggttgggatatgggttattgggtccccactaaatcttatgctgaaatgtgatccctggttggcaatattaga  
-tatatagcctgggtgggtggttgggatcatgagaatggatccctcatgaatggcttgggtg-----  
-----  
-----tcc-ccagggttggccttctctcgca----catactcgcttctcctttgaccttctctgacatg  
ttttgactcatcatggaagacctcaccagaagccaagcagatgtaggagccatgcttcttt----cacagcctacaga  
accgtgagctaaataaacctcttttctttataaattactcagctcaggtattcttttatagtaacacaaaacggact  
aagaca---CATCA---TACTGTAA----AATAAAGGAAGA-----TTTTAAAAAGTGAATTAATATACAGTT  
ACTCCATAGACAATTAGGAATAATTTGGGCAGCATGGTAACAGCTCGTGCACACTGCATTGGGGATCCACTCCTGCTCTT  
TGAACCCAGAAGAACCTGAT-TCAGATTTGATTGACAACATGACCAGGG-TAGGATGCCTAGAGCTGGGGTCTGGTTG  
AAATGAGATG-----GGATGATCAAAGTAGGTGATCTG-
```

>Baboon

```
TGATAGTCTGTTTCAGTTTGAATACATTTGTGAAGCAAATTCACAAATTGCGTATTTTATCTTCTGG---AATG-T---  
tgctatgggttgggatatgggttattgggtccccacaaatctcatgctgaaatttgatccctggagtggtggcaatattaca  
-gggtgtagcctgggtggggcatggttgggtcatgagaatggatccctcatgaatggcttgggtg-----  
-----  
-----tcc-ccagggttgccttctcttgca----catacctgcttctcctttgacttctctgatggt  
ttttgactcatcacagaagaccttaccagaagccagggtggatgtaggagccatgctgcttg-----tacagcttacaga
```

actgtgagctgaataaacctcttttctttataaattactcagctctcaggtattatattttatagcaacacaaaacggacg  
aagaca---TG-TA---TTACTGTAA----AATAAAGGAAGA-----TTTTAA-----AATTAACATCAAGTT  
ACTCCATAGGCAATCAGGAATAATTTGGGCAGCATGGTAACAGCCGCTGCACTGCATTTGGGATCTGCTCCTGCTCTT  
TGAACCCAGAAGAACCTGAT-TCAAATTTGACTGACAACATGACCAGGG-TAGGATGCCTAGAGCTGAGGTCTGGTTG  
AACTGAGATA-----GGATGATCAAAGCAGGTGATCTG-

>Rhesus

TGATAGTCTGTTTCAGTTTGAATACATTTGTGAAGCAAATTCAAAATTGCGTATTATATCTTCTGG---AATG-C---  
tgctatgggttgatgatgggttattgggtccccaccaaactctcatgctgaaatttgatccctggagtggaatattaca  
-gggtgtagcctgggtggggcatatattggatcatgagaatggatccctcatgaatggcttggtg-----

-----tcc-ccaggtttgtcccttctttgca----catacctgcttctcctttgactttctctgatgtg  
ttttgactcatcacagaagaccttaccagaagccaagcggatgtaggagccatgcttcttg---tacagcttacaga  
actgtgagctgaataaacctcttttctttataaattactcagctctcaggtattatattttatagcaacacaaaatggacg  
aagaca---TG-TA---TTACTGTAA----AATAAAGGAAGA-----TTTTAA-----AATTAACATCAAGTT  
ACTCCATAGGCAATCAGGAATAATTTGGGCAGCATGGTAACAGCCCCTGAACTGCATTTGGGATCTGCTCCTGCTCTT  
TGAACCCAGAAGAACCTGAT-TCAAATTTGATTGACAACATGACCAGGG-TAGGATGCCTAGAGCTGAGGTCTGGTTG  
AACTGAGATA-----GGATGATCAAAGCAGGTGATCTG-

>Marmoset

TGATAGTCTGTTTCAGTTTGAATACATTTGTGAAGCAAATTCAAAATGTCATATTATATCTTCCGG---AATG-C---  
tgctatgggttcggatgatgggttgggttgggtccccaccaaactctcatgctgaaatttgatccctgcagtggaatattgga  
-gggtgcagcctgggtggggagtggttggattatgagaatggatccctcatgaaggg-ttgggtg-----

-----ccc-ccaggtttgtcccatcttcaca----catacctgcttctcctttgaccttctttgacatg  
ttttgactcatcgcagaagtcctcaccacaagccaagcagatgtaggagtcagcttctttg---tacagcctacaaa  
actgtgagctaaataaacctcttttctttgtgaattattcagctctcgggtattcttttatagcaaacatgaagc-----  
-aggca---CACCA---TTACTGTAA----AATAAAGGAAGA-----TTTTAAAAAGGAAATTAACATCGACTT  
ACTTCACAGGCAATCAGGAATAATTAGGACAGCTTGGTAACAGCACCTACACTGCATTTGGGATCCACTCCTGCTCTT  
CGAACCCAG-GGAACCTGAT-TCGAATTTGATTGCCAACATGACCAGGG-TAGGATGCTTAGAGCTGCAGTCTGGTTG  
AACTGAGATG-----ACGTGATCAAAGCAGGTGATCTG-

>Tarsier

TGATGGCCTATTTCAGTTTGGATATATTTGTGGAGCAAATCC-AAATTGCCTATTATATCTTCTGG---AATGGG---  
tgctatgatttgatgatgggttgggttgggtccccgcaaatctcatgctgaaatttgatcccagtggtggtggtggtgaa  
-gatgggacctgggtgggaggtggttgggttggag-gcgtatc-cttatgaatggcttgag-----

-----cctgtcaagtttcttccctcttctcaagtccatgcctactttccctttgaccttctctgcatg  
ttttgactcaatacaaaaagcccttactgaaagctgagtagaggcaagcaccatgcttcttg---catagcct-----  
---gtgagaaaaagaaatctcttttctctataaattaccagtcctcggtatttact---agcaatataaaacagact  
aagaga---CATGG---TTGCCATAAAACGAATAAGGGAAGA-----TGTTTAAAAAATGGAACACAATGTCCCATT  
ACTCCATCGGCAATCAGGAATCATTGCGCAGGATGGTAATAGCTCTCACACTGCATTTGGGATCCACTCCTGTTCTT  
TGAACCCAGAAGAATCTGGT-TCACATTTGACTGTCAGCATGATTGGGG-TAGGATGCCAGAGCTAGGTGCTGGTTG  
AACTACAATGCTGTTATGTTATCAAAGTACCTGAGATG-

>Bushbaby

TGAAAGCCCATTTAAT-TCAATACAATGGTAGAGCAAATTCT-AAATATCCTGTTTTATCTTCTGG-----

-----CATGG---TTAACTTAAAACAAGAAAAGGAAGATTTTTTTTTTTTTTAAATGGAAGTAAGCATCCAATT  
ACTTGACTGGCAATCAGGAATAATTTGGGCAAGTTAGCAACAGTGCTCACATTGCTTTTGGGATCCATTCTACCTT  
TGAACCCAGAAGAATCTGGT-TCAGATTTGACTGCCAGTGTAACCTGGG--CAGATGCCAGAGCCAGGTTCCGGTTG  
CCCTGCAATG-----GTGTTATCAAAGCACCTGAGAT--

>Mouse\_lemur

TGAAAGCCCATTTCAGTCTGAATACAATTGTGGGGCAAATTCT-ATATATCCTATTTTTATCTTCTGG-----

-----  
-----  
-----  
-----  
-----CATGG---TTACCTTAAAACAAATAAAGGAAAA---TTTTTTAAAAAATGGAATTAAGCATCCAATT  
ACTCCAATGGCAATCAGGAATAATTTGGGCAAAATAGTAACAACACTCATACTGCATTTAGGATTCATTCTGCCTTT  
TGAACTCAGAAGAATGTGGT-TCAGATTTGCTGGCCAGCGTGACTGGGG-TAGGATGCCAGAGCTAGGTTCTGGTTG  
AACTGCGATG----GTGTTATCAAAACACCTGAGATC-  
>Mouse  
CAGCAGTGTATTCAAGTTTGAATACATTTGTGTAACAAATGCT-GTGT--TTTATTTTGTCCACTGG-----  
-----  
-----  
-----  
-----  
-----  
-----  
-----GATGA---TTACCTTAAAATAAAAAAAAAAAAA---AGAATTCT--AAATGCAATTAATGCCCAATT  
GCCCCGTGAGCCATCATTAAATAATTTTGCAGGATAGGAGCAGCTTTTATGATGCATTTTAGAC-----CCCTT  
TGAACCCAGAAGAATCTGCC-TCAAATTGAACTGGCAGTATGC--AGGG-TAGGATGCCTGGAGCTGGAAGCTACAAG  
AGACATGATG----TAATTACCAAAGCATGTCAGATT-  
>Guinea\_pig  
GGAAAGCACGATTGATCTGAGAGTGTATATAGAGAAAATTCT-AAATTACCTATTTTTCTT-CTGA-----  
-----  
-----  
-----  
-----  
-----  
-----AGTGT---TTACTTTAAAATAAATGAAAGAAGA-TTTTTTTTTAAAAAATGGAATTAATGTCCAGTA  
ATTCCATTGCTAATCAGGAATAATTTGGGCAGGACAACAGCTGCTCTTTGCTGTGCCTGGGATCCACTTCTGCCTTT  
GGAACCCAGAAGAATCTGGT-TGGGATTGAACTGTCCACATGC-TGGGGTTAGGATGCACTGGGGCAGCAGCTGGTTA  
AGCCATGAAG----GTATCATCAAAG-----  
>Horse  
TAATAGCCCATTCATTTAGAATACGTCGGTGGAGCATATCCC-AAATTGTGTATTGTATCTTCTGT-----  
-----  
-----  
-----  
-----  
-----  
-----CATGG---TTACCTTAAAACAAATAAACGGAGA-----TTAACAAAATGAACTCAATAC----TT  
ACTCCATTGGCAATGAGGAATAAGTTGGGCAAGATGGTA-----GCATTTATAGATCACTCCTGCCCTT  
TGAACTCAGCAGAATCTGGTGGAAAGATTTGACTGCAAACCTGATGAGGG-GAGGATGCCAGAGCCAGGTGCTGGTTG  
AACTGTGACA----ATGTTTTTACAGTACCTACAATC-



tgaagtcttatggtgaaatgtgattcctaataattggagggcagggcctgggtgggaggtggttggatcgtggggggtggat  
ctctcatgggatgacttagtgccctc-ctcaaggtaa---taaagaggttcttgctctatcaggtcctgagaaagttcc  
cttaggtgctgggtggttagaaagagcttggca--ccttcctcctcgctcttgcttccctctctcagcaggtga--tct  
ctgcacaccaggtcccctggccaataaaatgtgaatggaagcagcctgaggccctcaccagatgtagacgctcagcgt  
gtgaatccttgacagcctgtggagctatgagccaaataaacctcttttct-----ttataaatttcccagcctcaggt  
attccttttatagcaacacaaacta-actaaaacg---GATGT---ATGCCATATGCTAGACCTATGATATAATACTT  
ACAGAATTCATTTCTGATACTT--AAAATTTTTTTTGGAGCTATAGTTAATATTTTCTAAAATTCACCC-ATTTAAAG  
TGTCCCTCTTCAATTTCTTGTCTATTCTGGAAATTTGCCTATAGATTTTTTTTTTAATGTCTGGACATTTGATATAAAC  
AGAATCTTTTTTA

> Baboon

CATAGTAAAAGTAATGA-TGTTTCACTGAA-GTTCACTAAGGCATAGTTTGTAACTCTTGTC--AATATAAATCCATT  
AATTCCTTCTTTTTTTT-CATTCGGAAAATATTTATTG---GTTGC---tggtatgatttggatatgggttgcctggcc  
cca-----  
-----  
-----

tgaagtcttatggtgaaatgtgattcctaataattggagggcagggcctgggtgggaggtggttgggtcgtggggggtggat  
ctctcctgaatgacttagtgccctc-ctcaaggtaa---taaagaggttcttgctctattaggtcctgagaaagttcc  
cttaggagctgggtggttagaaagagcttggca--tcttccttctcgctcttgcttct-tctttcagcaggtga--tct  
ctgcacaccagctccccttctctcttgctgtgaatggaagcagcctgaggccctcaccagatgcagacatcagcact  
gtgcttcttgacagcctgtggagctatgagccaaataaacctcttttctgtactttataaatttcccagcctcagat  
gttccttttatagcaacacaaacta-actaaaaca---GATGT---CTACCATTTGCTAGACCTATGATACAATACCT  
ATAGAATTCATTTCTGATATTT--AAAATTTTTTTT-GAGATGTAATTAATATTTTATAAAAATTCACCC-ATTTAAGG  
TGTACGA--TAGATACATTTGTTATTCTGGAAATTTGCCTATAG--ACTTTTAAAATGTCTGCACATTTGATATAAAC  
AGAATCACATGG

> Rhesus

CATAGTAAAAGTAATGA-TGTTTCACTGAA-GTTCACTAAGGCATAGTTTGTAACTCTTGTC--AATATAAATCCATT  
AATTCCTTCTTTTTTTT-CATTCGGAAAACATTTATTG---GTTGC---tggtatgatttggatatgggttgcctggcc  
cca-----  
-----  
-----

tgaagtcttatggtgaaatgtgattcctaataattggagggcagggcctgggtgggaggtggttgggtcgtggggggtggat  
ctctcctgaatgacttagtgccctc-ctcaaggtaa---taaagaggttcttgctctattaggtcctgagaaagttcc  
cttaggagctgggtggttagaaagagcttggca--tcttccttctcgctcttgcttct-tctttcagcaggtga--tct  
ctgcacaccagctccccttccccttcttgctgtgaatggaagcagcctgaggccctcaccagatgcagacatcagcgt  
gtgcttcttgacagcctgtggagctatgagccaaataaacctcttttctgtactttataaatttcccagcctcagat  
gttccttttatagcaacacaaacta-actaaaaca---GATGT---CTGCCATTTGCTAGACCTATGATACAATACCT  
GTAGAATTCATTTCTGATATTA--AAAATTTTTTTT-GAGATGTAATTAATATTTTATAAAAATTCACCC-ATTTAAGG  
TGTACGA--TAGATACATTTGTTATTCTGGAAATTTGCCTATAG--ACTTTTAAAATGTCTGCACATTTGATATAAAC  
AGAATCACATGG

> Marmoset

AATAGTAAAATAGTAA-TGTTTTTATGAA-GTTTACTAAGGCATAATTTATAACTCTGGTC--AATATAAATCTATT  
AATTCCTTCAATTTTTT-CATTCAGCAAACACTTACTG---GTTGC---tgctatgatttggatataggttgcctggcc  
ccaCCAAGTCCTTTTTTATTTTTTTTTTTTGGAGACAGAGTCTCAGTCTGCTACCTAGGCTGGAGTGCAGTGGCGCTATTTT  
GGCTCACTGCAACCTCTGCCTCCTGGGTTCAAGTGATTCTCCTGCCTCAGCCTCCTGAGTAGCGAGATTACAGGTACC  
CACCCTATGCCAGCTAATTTTTTGGATTTTTTAGTAGAGATAGGGTTTTACCATGTTGGTCAGGCTGGTCTTGAACGA  
CTGACCTCATGATCTGCCACCTCTGCCTCCCAAAGTGCTGGGATTATAGGTATGAACCACCATGCCGGCCAGCCCCA  
ccaagtcttatggtgaaatgtgatccctaataattggagggcagggcctgggtgggaggtggttgggtcatatgggtggat  
ctctcatgaaagacttagtgcttc-cttaaggtaa---tgaatgaggttcttgatctattagttcctgagaaagtttc  
ctcaggagctgggtggttagaaagagcctggca--tcttcctcctctctcttgcttcc-tttctcagcaggtga--tct  
cagcacaccagttcccctt---cttctgccatcaatggaagcagctgaggcccttgccagatgcagatgtcagtgct  
gtgctgcttgacagcctgcagaactctgagccaaataaacctcttttct-----ttatcaatttcccagcctcaggt  
agtccttt-ataacaacacaaacta-actaaaaca---GATGT---TTACCATGTGCTAGACCTATGATACAATACTT  
ACAGAATCCGTTTCTGATACTT--AAAAGTTTTTTAGAGATATAATTAATATTTTATAAAAATTCACCC-ATTTAAAC  
TGTACAA--TAGATGCATTTGCTATTCTGGAAATTTGCCTATAG--ATTTTTCTA--GTCTGGACATTTGACATAAAT  
GTAATCACATGA



```
-----  
-----  
-----  
-----GATGT---CTACCATATGC-----TATGATATAAAAATTG  
ATGGAATTTATTTTTGATACTTTGAAAATGTCTTTTTGATAAATAATTAACATATCATAAAATGAACCC-ATTTAAAA  
TGTGTGATATATATGATTTGCTGATTCTAGACATTTGTCCATAG--ATTTTTCTA--GTT--GACATTTGATAAAAAAT  
GAAATCACATAA  
>Dog  
TATAGTGAAAAT---GA-TGCTTCCGTGAAGTTTTACTAAGGCACACAGTTTGCAGCCCCTGTGAATTTAAGCCCACT  
GATTCCTTCACTTCTT-CATCCAGCAAACATTTATTG-----  
-----  
-----  
-----  
-----  
-----  
-----  
-----  
-----  
-----  
-----  
-----  
-----  
-----  
-----  
-----G-TGC---CTGTCATATGCTAGGCCTAGGATATAAAAATTC  
GTAGAATTCATTTTTGCCACTTAAAAAATCTTTACCAAGATAGAATTCATACACCATAAAAATTCCTC-ATGTAAAG  
TTTACAGTTTATATGACTTACCTATTCTGGAAATTTGCCTATAG--ATTTGCCTA--TTCTGGATATTTAATATAAAT  
GGAATCACA--A
```



**Marker M78**

>MSTB1

-----tgctatagtttggatgttt  
gtccccccaaacctcatgttgaaatttgatcccc-agtgttggaggtggggcctaattgggaggtgtttgggtcatgg  
ggcgatccctcatgaatagattaatgccct----ccctcgggggtggggatgagtgag---ttctcactctattagt  
tccc-----gcgagagctgggtg-----ttaaaaagagcctggcacctccctcctctctctcttcttgcctc  
ctctctcgccatgtgatctctgcacacgcggctcccccttcaccttccgccatgagtggaagcagcctgagggcctca  
ccagaagcagatgctggcg-ccatgcttcttgtacagcctgcagaaccgtgagccaaataaacctcttttctttataa  
attaccagcctca-----ggattcctttatagcaacacaaaatggactaagac  
a-----

>Human

GAGATTCA-AACACTTTGCCACTATCATCTGTCCAGAATTCTCCCGTTTTTCTTGAG-AAAAAAAAAAGAAG---TT  
CTGTGATTTTTGTCAATTGACAAATGTATGAGACTATTGACATCTATAAC---ATCAT---tgagatagttcggatattt  
-tccccccaaatctcatgttgaaatttgatcccc-agtgttggag-tggggctaatgggaggagtttgggtcatgg  
gggctgatcccttatg-----aatgccttgggtgccagctttgt---aatgagtgagttcttcttgggtctattagt  
tccc-----accagaactgattgtttaaagtcttttaaaaag-tctggcacctccctccc-ctctcttgccttct  
tctttttaccatgtg-----atgcctacttcttcttcaccttctaccatgagtggaagcttctgagggcctca  
ccagaagcagatgctggca-ccatgttcttgtaaagcctgcagaaccataagccaaataaaccttatcttctttataa  
attaccagtaatttataa-----agtatcccttcatagtaacacaa-ttggaccaagat  
g---ATC-C---TTGGAAAAGTTGAGCTTT-GGGGCTATGCTTTTGAAGTCCCCTGAAATTCT----AAGAGCCCCTG  
TTTTTGCTTTTGAATTTACATGTGCATGGCCTCATTGAGCCAA-GTATATGG

>Chimp

GAGATTCA-AACACTTTGCCACTATCATCTGTCCAGAATTCTCCCGTTTTTCTTGAGAAAAAAAAAAGAAG---TT  
CTGTGATTTTTGTCAATTGACAAATGTATGAGACTACTGACATCTGTAAC---ATCAT---tgagatagttcggatattt  
-tccccccaaatctcatgttgaaatttgatcccc-agtgttggag-tggggctaatgggaggagtttgggtcatgg  
gggctgatcccttatg-----aatgccttgggtgccagctttgt---aatgagtgagttcttcttgggtctattagt  
tccc-----accagaactgattgtttaaagtcttttaaaaag-tctggcacctccctccc-ctctcttgccttct  
tctttttaccatgtg-----atgcctgcttcccttccaccttctaccatgagtggaagcttctgagggcctca  
ccagaagcagatgctggca-ccatgttcttgtaaagcctgcagaaccataagccaaataaaccttatcttctttataa  
attaccaagtaatttataa-----agtatcccttcatagtaacacaa-ttggaccaagat  
g---ATC-C---TTGGAAAAGTTGAACTTT-GGGGCTATGCTTTTGAAGTCCCCTGAAATTCT----AAGAGCCCCTG  
TTTTTGCTTTTGAATTTACATGTGCATGGCCTCATTGAGCCAA-GTATATGG

>Orangutan

GAGATTCA-AACACTTTGCCACTATCATCTGTCCAGAATTCTCCTGTTTTTCTTGAG--AAAAAAAAAAGAAG---TT  
CTGTGATTTTTGTTATTGACAAATGTATGAGACTATTGACATCTATAAC---ATCAT---tgagatagttcagatattt  
-tccccccaaatctcatgttgaaatttgattccc-agtgttggag-tggggcctaattgggaggagtttgcacatgg  
gggctgatcccttatg-----aatgccttgggtgccagttttgt---aatgagtgagttcttcttgggtctattagt  
tccc-----accagaactgattgtttaaagtcttttaaaaag-tctggcacctccctccc-ctctcttgccttct  
tctttttaccatgtg-----atgcctgcttcccttccaccttctaccatgagtggaagcttctgagggcctca  
ccagaagcagatgctggca-tcatgttcttgtaaagcctgcagaaccataagccaaataaaccttatcttctttataa  
attaaccagtaatttataaagtatcccttccacagtaactatgaaatatcccttcatagtaacacaa-ttggaccaagat  
g---ATC-C---TTGGAAAAGTTGAGCTTT-GGGGCTATGCTTTTGAAGTCCCCTGAAATTCT----AAGAGCCCCTG  
TTTTTGCTTTTGAATTTACATGTGCATGGCCTCATTGAGCCAA-ATATATGG

>Baboon

AAGATTCA-AACACTTTGCCACTATCATCTGTCCAGAATTCTCCATTTTTTCTTGAG---AAAAAAAAAAGAAG---TT  
CTGTGATTTTTGTTATTGACAAATGTATGAGACTATTGACACATAACAAC---ATCAC---tgagatagttgggatattt  
-tccccccaaacctcatgttgaaatttgatcccc-attgttggag-tggggcctaattgggaggagtttgggtcgagg  
gggttgatcccttatg-----aatgccttagtgccagcttctgt---aatgagtgagttctt---gttctatcagt  
tccc-----gccagaactgattgtttaaagtcttttaaaaag-tctggcacctccctccc-atctcttgcctcct  
tctttttaccatgtg-----atgcctgctccttccaccttcttccatgaatagaagcttctgagggcctca  
ccagaagcagatgctaata-ccatgttcttgtaaagcctgcagaaccataaaccaaataaaccttatcgtctttataa  
attaccagtaatttataa-----agtatcctttatagcaacacag-ttggaccaaggt  
g---ATC-C---TTGGAAAAGTTGAGCTTT-GGGGCTATGCTTTTGAAGTCCCCTGAAATTCT----AAGAGCTGCTG  
TTTTTGCTTTTGAATTTACATGTGCATGGCCTCATTGAGCCAA-GTATATGG



>Guinea\_pig

----TTCA-GAAAC--TGCCATT-----GTAATTCCTCCAGAATTCTTTCTTAAGAAAGAAAGAAAAAAAC  
CTTCATAATTCTGTAGTTGACAAATGAATTAGGTTGACACATTCAAC-----

-----ATCAC---TTAGGAAAGTTGAGTGTT-AGAGCTGTGTTTTTTAAGTTACCTGAAACTGTGAGAGAAAAC-ACTG  
ATTTGC-TTTGGAATTGGTAGATGTGCAGCTTCACTTTGACCAGAGTATGTGA

>Dog

----TTAA-AAAATATGCCACCATCATCTTCTGATAATCCTCTAG----TCTT---TCTAGAGAAAAGAATTGTT  
CTATAACTTCATAATTGACAAGTAAATTAGCTTATTGATACACATAAT-----

----GTCAC---T-----TGAAGTTTT-GGGGCTACACTTTTGAAGTTCCCTGAAATTCT----GAGAGCCATTG  
TTTTTGCTTT-GAGTTTACATGTACA-----TCTGGACCAA-GTATGTGG

>Horse

----TTCA-AAATCCAGGCCACCATCATCTTTCTAGAATTCCTCCAGTTTTTTCTT-----GAAAAAAATTGTT  
CTGTAATTTTATAATTGACAAATGTATTAGATTATTGACACATATGAC-----

----ATCAC---TTAGAAAAGTTGAGCTTC-TGGGCTTTGCTTTTGCAGTTCTCTGAAATTCT----AAGAGCCTTTG  
TTTTGGCTTTTGAATTTACATGTGCA-----TTTGAACAA-GTATGTGG

## Marker M80

>MSTB1

```
-----tgctatagtt
tggatgtttgtcccctccaa-acctcatgttgaaatttgatccccagtggtggaggtggggcctaagggaggtgtt
gggtcatggggcggtaccctcatgaatagattaatgccctccc-----
-tcgggggtggggatgagtgagttctcactctattagttcccgcgagagctgggtgttaaaaagagcctggcacc----
-----tccctcctctctctcttg-----cttcctctct
cgccatgtgatctctgcacacgccggctccccttcaccttcgccatgagtggaagcagcctgagggcctcaccagaa
gcagatgctggcgccatgcttcttgtagcagcctgcagaaccgtgagccaaataaacctcttttctttataaattacc
agcctcaggtattcctttatagcaacacaaaatggactaagaca-----
-----
```

>Human

```
TCTTCTTTTCTGCATTGCTATTACTTCTAAATGATATAGTCGAAATGATATTCTTTC---AAATT---tgaccgagtt
tagctatthtatccactgaaaaatctcttggtgaaatttgatgtccaatggtggaggtggggccttggtgggaggtgt-t
gagtcagtgggggcagaaccttcatgaatggcctgggtgcccttctcaa-----
-----agtaaagactgagctcttgctctattagttcctttgagaacggattgttaaaaagaggctggca-----
-----tctctctcccttc-----tga
aaccatgtgatgcctg-----ctccccttcaccttcctccacaagtgggggcagcctgagggcctcaccaaat
gcagatatcagtgccatgcttcttgtagcagcctgcagaattatcagctaattaaacct-ctttctttatcaattacac
gctctcacatattcctttatagcaatgc-caacagactaaaaca---A-AATT---GAGAACTTCCCAAATAGATCA
CTCTGGGCTAAGTTGTCTAGTAGA-ATAACATGCAGAAAACCTTTACCAGTAAAACCTGCA-----TAGAAATTACCAG
AAA--ACAATA---ATATATGAAAAATCATTTCCATGACTAAAGT
```

>Chimp

```
TCTTCTTTTCTGCATTGCTATTACTTCTAAATGATATAGTCGAAATGATATTCTTTC---AAATT---tgacctagtt
tagctatthtatccactgaaaaatctcttggtgaaatttgatgtccaatgctggaggtcgggcctagtgagggtgt-t
gagtcctgggggcagaaccttcatgaatggcctgggtgcccttctcaa-----
-----agtaaagactgagctcttgctctattagttcctttgagaatggattgttaaaaagaggctggca-----
-----tctctctcccttc-----tga
aaccatgtgatgcctg-----ctccccttcaccttcctccacaagtgggggcagcctgagggcactcaccaaat
gcagatatcagcgccatgcttcttgtagcagcctgcagaattatcagctaattaaacct-ctttctttatcaattacac
gctctcacgtattcctttatagcaatgc-caacagactaaaaca---A-AATT---GAGAACTTCCCAAATAGATCA
CTCTGGGCTAAGTTGTCTAGTAGA-ATAACATGCAGAAAACCTTTACCAGTAAAACCTGCA-----TAGAAATTACCAG
AAA--ACAATA---ATATATGAAAAATCATTTCCATGACTAAAGT
```

>Orangutan

```
TCTTCTTTTCTGCATTGCTATTACTTCTAAATGATATAGTTGAAATGATATTCTTTC---AAATT---tgacctagtt
tagctgggttatccactgaaaaatctcttggtgaaatttgatgtccaatggtggaggtcgggcctagtgagggtgt-t
gagtcagtggggacagaaccttcatgaatggcctgggtgcccttctcaa-----
-----ggtaaagactgagctcttggtctgtagttcctttgagaacggattgttaaaaagaggctggca-----
-----tctctctcccttc-----ttt
caccatgtgacacctg-----ctccccttcaccttcctccacagtggggggcagcctgagggcctcaccaaat
gcagatatcagtgccatgcttcttgtagcagcctgcagaattatccgctaattaaacct-ctttctttataaattacat
gctctcacgtattcctttatagcaatgc-aaacagactaagaca---A-AATT---GAGAACTTCCCAAATAGATCA
CTCTGGGCTAAGTTGTCTAGTAGA-ATAACATGCAGAAAACCTTTACCAGTAAAACCTCA-----TAGAAATTACCAG
AAA--ACAACA---ATATGTGAAAAATCATTTCCATGACTAAAGT
```

>Baboon

```
TCTTCTTTTCTGCATTGCTGTTATTTCTAAATGATATAGTCGAAATGATATTCTTTC---AAATT---tgacctagtt
tagctatthtattcactgaaaaatctcttgctgaaatttgatgtccaatggtggaggtggggcctagtgagggtat-t
gagtcagtcggggcagaaccttcatgaatggcctgggtgcccttctcaa-----
-----agtaaagactgagctcttgctctattagttcctttgagaatggattgttaaaaagatgctggca-----
-----tctctctcccttc-----ttt
caccaagtgatgcctg-----ctccccttcaccttcctccacagtggggggcagcctgagggcctcgccaaat
gcagatatgggtgccatgcttcttgtagcagcctacagaattatcagctaattaaatct-ctttctttataaattacgc
actcccaggtattcctttatagcaatga-aaacagactaagaca---A-AATT---GAGAACTTCCCAAATAGATCA
CTCTGGGCTAAGTTGTCTAGTAGA-AAAACCCGCAGAAAACCTTTACCACCAAACCTG-----TAGAAATTTCCAG
AAA--ACAATA---ATATATGAAAAATCATTTCCATGACTAAAGT
```





## Marker M81

>MSTB1

```
-----  
-----tgctatagt-ttggatggtttgtcccctccaaacctcatggtgaaatttg  
atccccagtggtggaggtggggcctaattgggaggtggttgggtcatggggcg-----atccctcatgaatagatt  
aatgccctccctcggggtgggatgagtgagttctcactctattagttccc-gcgagagctggttgtaaaaagagcc  
tggcacctccctcctctct-ctcttgcttcctctc--tcgccatgtgatctctgcacacgcggctccccttcacctt  
ccgccatgagtggaagcagcctgaggccctcaccagaagcagatgctggcgccatgcttcttgtagcagcctgcagaac  
cgtgagccaaataaacctcttttctttataaattaccagcctcaggtattcctttatagcaacacaaaatggactaa  
gaca-----  
-----
```

>Human

```
GATTCTT-TAAGAGCACCCAGGTCAGTGTGGCCACAAAAGGGCC--AAACCTATTGGTTTCAATACTCTAGGTTTGA  
AAGAATATAACCAGGCTTG---GGCTC---tgatataatgttggatattttcccctccaaatctcatggtgaaatttc  
atccctaattggtggaggtgaggcctaattgggacctggttgggttatgggggtgggagatggctccctcctgaatgcctt  
ggtgccatcctt---gtagtaatgagtggttttcatgctattatttccc--ggagaactgagtggtggacaggagcc  
tggcacctccctcctcctct-ctcttgcttccttcctctcaccatgtgat-----gccaaactccccttcgcctt  
ctgtcatgagtggaagcttccctgagg-cctcaccaggagcaggtgctgggtgccatgcttctatactgcctgcagaac  
cgtgagccaaatctctctttcatt-ataaattactcagctgcaggtgttcccttatagcaatacaaaa-cagactaa  
gaca---GGCTC---CAAGGAAACCTGAGTGGGGAGGAGGGA-GTGGGCAGGGGTTGAGGAAGGAGGCTGCATGGAGA  
AAGATAGGCTTGCATGGCCTTTTCT
```

>Chimp

```
GATTCTT-TAAGAGCACCCAGGTCAGTGTGGCCACAAAACGGCC--AAACCTATTGGTTTCAATACTCTAGGTTTGA  
AAGAATATAACCAGGCTTG---GGCTC---tgatataatgttggatattttcccctccaaatctcatggtgaaatttc  
atccctaattggtggaggtgaggcctaattgggacctatgttgggttatgggggtgggagatggctccctcctgaatgcctt  
ggtgccatcctt---gtagtaatgagtggttttcatgctattatttccc--ggagaactgagtggtggacaggagcc  
tggcatctccctcctcctct-ctcttgcttccttcctctcaccatgtgat-----gccgactccccttcgcctt  
ctgtcatgagtggaagcttccctgagg-cctcaccaggagcaggtgctgggtgccatgcttctatactgcctgcagaac  
cgtgagccaaatctctctttcatt-ataaattactcagctgcaggtgttcccttatagcaatacaaaa-cagactaa  
gaca---GGCTC---CAAGGAAACCTGAGTGGGGAGGAGGGA-GTGGGCAGGGGTTGAGGAAGGAGGCTGCGTGGAGA  
AAGATAGGCTTGCATGGCCTTTTCT
```

>Orangutan

```
GATTCTT-TAAGAGCACCCAGGTCAGTGTGGCCACAAAAGGGCC--AAACCTATTGGTTTCAATACTCTAGGTTTGA  
AAGAATATAACCAGGCTTG---GGCTC---tgatataatgttggatattttcccctccaaatctcatggtgaaatttc  
atccctaattggtggaggtgaggcctaattgggacctggttgggttatgggggtgggaggtgggtccctcctgaatgcctt  
ggtgccatcctt---gtgtaatgagtggttttcatgctattatttccc--aggagaactgagtggtggacaggagcc  
tggcacctccctcctcctct-ctcttgcttccttcctctcaccatgtgat-----gccgactccccttcgcctt  
ctgtcatgagtggaagcttccctgagg-cctcaccaggagcaggtgctgggtgccatgcttctatactgcctgcagaac  
cgtgagtcgaatctctctttcatt-ataaattactcagctgcaggtgttcccttatagcaatacaaaa-cagactaa  
gaca---GACTC---CAAGGAAACCTGAGTGGGGAGGAGGGA-GTGGGCAGGGGTTGAAGAAGGAGGCTGTGTGGAGA  
AGGATAGGTTTGCATGGCCTTTTCT
```

>Baboon

```
GATCCTT-TAAGAGCACCCAGGTCAGTGTGGCCACAAAAGGGCC--AAACCTATTGGCTTCAATACTCTAGGTTTGA  
AAGAATAAACCAGGCTTG---TACTC---taatataatgttggatataatttcccctccaaatctcatggtgaaatttc  
atacctaattggtggaggtggggcctaattgggacctggttgggttatgggatgggtgggtccctcctgaatacctc  
ggtgccatcctg---gtagtaatgagtggttttcatgctattcgttccct-gggagaactca--ctggaaaggagcc  
tggcacctccctcctcctct-gtcttgcttccttcctctcaccatgtgat-----gccgactccccttcacttt  
ctgtcatgagtggaagcttcccagg-cctcatcaggagtaggtgctgggtgccatacttcttatacagcctgcagaac  
cataagccaactttatctatttctcatt-ataaattactcagctgcaggtgttcccttatagcaatacaaaa-aaactaa  
gaca---GGCTC---CAAGGAAACCTGAGTGGGGAGGAGGGA-GTGGGCAGGGGTTGAAGAAGGAGGCTGTGTGGAGA  
AGGATAGGCTTGCATGGCCTTTTCT
```

>Rhesus

```
GATCCTT-TAAGAGCACCCAGGTCAGTGTGGCCACAAAAGGGCC--AAACCTATTGGCTTCAATACTCTAGGTTTGA  
AAGAACAAACCAGGCTTG---TGCTC---taatataatgttggatataatttcccctccaaatctcatggtgaaatttc  
atacctaattggtggaggtggggcctaattaggacctggttgggttatgggatgggtgggtccctcctgaatatctt  
ggtgccatcctg---gtagtaatgagtggttttcatgctattcgttccct-gggagaactca--ctggaaaggagcc  
tggcacctccctcctcctct-gtcttgcttccttcctctcaccatgtgat-----gccgactccccttcacttt
```







## Marker M82

>MSTB1

```
-----  
-----  
-----tgctatagtttggatgtttgtccctccaaacctcatggtgaaatttgatccccagtggtggaggt  
ggggcctaattgggaggtgtttgggtcatgggggaggatccctcatgaatagattaatgccctccctcgggggtggggat  
gagtgagttctcactctattagttcccgcgagagctgggtgttaaaaagagcctggcacctccctcctctctc--tct  
tgcttctctctcgccatgtgatctctgcacacgccggctccccttcaccttccgccatgagtggaagcagcctgagg  
ccctcaccagaagcagatgctggcgccatgcttctgtacagcctgcagaaccgtgagccaaataaacctcttttctt  
-tataaattaccagcctcaggtattcctttat-agcaacacaaaatggactaagaca-----  
-----  
-----
```

>Human

```
ATGTTCTGTTGCAATAGCAAGTCACCTGGCAGCCAGGAGGAAATACTTCCCCACTGCCTTGTAATTGGCAGGTAGTGA  
GACAAAAGATGTGTTATCATTGGCAAGGGAGAACTTTCCTGA-TAATTCCTCTTAGATGAGCAAGCAATTT-AATCAA  
A---TATGT---tgatatagtttggacgtttgtccct-ctaaatctcatggtgaaatctgatccccagtggtgaaagt  
ggggcctactgggagatattttgatcgtgggggtggatctat---gaatggcctgggtgctattggtgcattac----c  
gagtgagttctcaaactattagttcccaccagatcttattgttaaaaagaatctggcaccttctccttcat---ttc  
tttcttctctcttacc-----tgtagcgcctgctctct---actttccgccatgagtagaagctccctgaag  
ccctcaccagaaacagatgctggcaccaggcttcttatacaccctgcagaatcatgagccaaataaacctctttttaa  
aaataaattaccagcctcaagtattcctttat-agcaacaca-aatggaataagaca---TATAT---AAAATCAGA  
AGATTGGATCTTCCAACCCCTCCCCCAGAATAGCAAAGCTAGAAATATGGAAGAAGCAATCCAGTTTTTATAAAT  
GGT-AAAAGCTGTTAATTTTGCAGTGAATTTTATACATG---TTTATTACAGCAGAGAAATCGTGTTATTTCCAGCT  
CCTC-TTTTT-ATTGCTAGGAAGCCTCACAGAATTACAACCAGTGAAATATTCCCCTTTTCTCT
```

>Chimp

```
ATGTTCTGTTGCAATAGCAAGTCACCTGGCAGCCAGGAGGAAATACTTCCCCACTGCCTTGTAATTGGCAGGTAGTGA  
GACAAAAGATGTGTTATCATTGGCAAGGGAGAACTTTCCTGA-TAATTCCTCTTAGATGAGCAAGCAATTTAATCAA  
A---TATGT---tgatatagtttggacatttgtccct-ctaaatctcatggtgaaatctgatccccagtggtgaaagt  
ggggcctagtgagggtattttgatcgtgggggtggatctat---gaatggcctgggtgctattggtgcattac----c  
gagtgagttctcaaactattagttcccaccagatcttattgttaaaaagaatctggcacattcgtcctctat---ttc  
tttcttctctcttactg-----tgtagcgccttctctct---actttccgccatgagtagaagctccctgaag  
ccctcaccagaaacagatgctgggtaccaggcttcttatacaccctgcagaatcataagccaaataaacctctttttaa  
aaataaattaccagcctcaagtattcctttat-agcaacaca-aatggaataagaca---TATAT---AAAATCAGA  
AGATTAGATCTTCCAACCCCTCCCCCAGAATAGCAAAGCTAGAAATATGGAAGAAGCAATCCAGTTTTTATAAAT  
GGT-AAAAGCTGTTAATTTTGCAGTGAATTTTATACATG---TTTATTACAGCAGAGAAATCGTGTTATTTCCAGCT  
CCTC-TTTTT-ATTGCTAGGAAGCCTCACAGAATTACAACCAGTGAAATATTCCCCTTTTCTCT
```

>Orangutan

```
ATGTTCTGTTACAATAGCAAGTCGCCTGGCAGCCAGGAGGAAAAACTTCTCACTGCCTTGTAATTGGCAGGTAGTGA  
GACAAAAGATGTGTTATCATTGGCAAGGGAGAACTTTCCTGA-TAATTCCTCTT-GATGAGCAAGCAATTTAATCAA  
A---TATGT---tgatatagtttggacatttgtccct-ctaaatctcatggtgaaatctgatccccagtggtgaaagt  
ggggcctagtgagggtatttggctcatgggggtggatccat---gaatggcctgggtgctattggtgcattac----c  
gagtgagttctcaaactattagttcccaccagatctgattgttaaaaagaatctggcaccttctcccctat---ttc  
tttcttctctctcaccg-----tgtagcgcctgctctct---actttccaccatgagtagaagctccctgaag  
ccctcaccagaaacagatgctggcaccaggcttctgtacaccctgcagaatcataagccaaataaacctctttttaa  
aaataaattaccagcctcaagtattcctttat-agcaacaca-aatggaataagaca---TATAT---AAAATCAGA  
AGATTGGATCTTCCAACCCCTCCCCCAGAATAGCAAAGCTAGAAATATGGAAGAAGCAATCCAGTTTTTATAAAT  
GGTAAAAAGCTGTTAATTTTGCAGTGAATTTTATACATG---TTTATTACAGCAGAGAAATCGTGTTATTTCCAGCT  
CCTC-TTTTT-ATTGCTAGGAAGCCTCACAGAATTACAACCAGTGAAATATTCCCCTTTTCTCT
```

>Baboon

```
ATGTTCTGTTGCAATAGCAAGTCACCTGGCAGCCAGGAGGAAATCTTCCCCACTGCCTTGTAATTGGCAGGTAGTGA  
GACAAAAGATGTGTCATCACTGGCAAGGGAGAACTTTCCTGA-TAATTCCTCTAAGATGAGCAAGCAATTTAATCAA  
C---TATGT---tgatatagtttggacttttgtctct-ctaaatctcatggtgaaatctgatccccagttatgaaagt  
ggggcctagtgagggtatttggattatgggggtggatccat---gaatggcctggtgctattggtgcattac----t  
gagtgagttctcaaactattagtttcccaccagatctgattgttaaaaagaatctggcaccttctcccctat---ttc  
tttcttctctctcacc-----tgtagcgcctgctctct---actttccgccatgagtagaagctccctgaag
```

ccctcaccagaaacagatgctggcaccaggcttcttgtagaccctgcagaatcataagccaaataaacttctttt-aa  
aaataaattaccagcctcaagtattcctttat-agcaacaca-aatggactaagaca---TATAT---AAAATCAGA  
AGATTGGATCTTCCAACCCCTCCCCAGAATAGCAAAGCTAGAAATATGGAAGAAGCAATCCCAGTTTTTATAAAT  
GGT-AAAAGCTGTAAATTTTGCAGTGAATTTTATACATG---TTTATTACAGCAGAGAAATCGTGTATTTCAGCT  
CCTC-TTTTT-ATTGCTAGGAAGCCTCACAGAATTACAACCAGTGAAATATTCCCCTTTTCTCT

>Rhesus

ATGTTCTGTTGCAATAGCAAGTCACCTGGCAGCCAGGAGGAAAATCTTCCCCTGCCTTGTAAATTGGCAGGTAGTGA  
GACAAAAGATGTGTCATCACTGGCAAGGGAGAACTTTCTGA-TAATTCCTCTAAGATGAGCAAGCAATTTTAATCAA  
C---TATGT---tgatatagtttggacatttgtctct-ctaaatctcatggtgaaatctgatccccagattgaaagt  
ggggcctagtgggaggtatttggattatgggggtggatccat---gaatggcctggttgcatttgggtgattac----t  
gagtgagttctcaaactattagtttccaccagatctaattgttaaaaagaatctggcgccttc-tcccctat---ttc  
tttcttctctcacca-----tgtgatgcctgctctcc---actttccgcatgagtagaagctccctgaag  
ccctcaccagaaacagatgctggcaccaggcttcttgtagaccctgcagaatcataagccaaataaacttctttt-aa  
aaataaattaccagcctcaagtattcctttat-agcaacaca-aatggactaagaca---TATAT---AAAATCAGA  
AGATTGGATCTTCCAACCCCTCCCCAGAATAGCAAAGCTAGAAATATGGAAGAAGCAATCCCAGTTTTTATAAAT  
GGT-AAAAGCTGTAAATTTTGCAGTGAATTTTATACATG---TTTATTACAGCAGAGAAATCGTGTATTTCAGCT  
CCTC-TTTTT-ATTGCTAGGAAGCCTCACAGAATTACAACCAGTGAAATATTCCCCTTTTCTCT

>Tarsier

ATGTTCTGTTCCAACCACAAGTCATATGGGAACAAGAAGGCCAAAATGTCCCATTGTCCCATAGTTGGATGG-----  
---ATGGGTTGTGTCAACATTGGCAAGGGAGAGATTTCTGA-TAATTCCTCCA-GGTGAGTAAGCAATTTTAACCAA  
A---TACAT---tgatttagtctggacatctgtcccttccaaatctcatggtggcatggtgctcaacattggaggt  
ggggccttgttaggatgt---ttggtcttgggggcagatccctcgcggctggcttgggtgccatTTTTgcagtaa---t  
gagtgagttctgcctctattagttccacagagatggtggtgtaaaaagagcctggcaccttccctcctctctctttt  
tcccttctctttcacca-----ttagatgcgctgggtccccttggcttctcctgcatgagtggaggtccctgagg  
ccctcggccagaagcagatactggtcaccatgcttcttatacagcctgtagaaccatgagtcaaataaacctctttt-tt  
taataaatcagtcagtcctagtttcttttttagcaacaca-aatggactaagata---TATAT---CAAATTAGA  
ATATTGGATCTTCCAACCCCTCCCCTAGAATAGAAAATCTAGAAATATGGAAGAAGCAATCTCAGTTTTTATAAAT  
GGT-AAAAGCTGTAAATTTTGCAGTGAATTTTATACATG---TTTATTACAGCAGAGAAATCATGTTATTTCAGCT  
CCTCTTTTTT-ACTGCTAGTAAGCCTCATGGAATTATAACCAGTAAAATATTCCCCTTA-CTCT

>Marmoset

ATGTTCTGTTGCAATAGCAAGTCACCTGGCAGCCAGGAGGAAAAACTTCCCCTGCCTT--AATTGGCAGGTGATGA  
GACAAAAG-----ATTGGCAAGAGAGAACTTTTCTGA-TAATTCCTCTAAGATGAGAAAAGCAATTTTATCAA  
A---TATAT---tgacatagtttggacatctg-ccct-ctaaatctcatggtgaaatctgatccccagcgttgaagt  
ggggcctagtgggaagtatttggatcatgggggaggatccgt---gaatgacttgggtgctattgggtcagtat---c  
cagtgagttctcaaactattagttcccatcagatctgattgtaaaaagagctcggcaccttcttctcc-----tc  
tctcttctctctcactg-----tgtgatgcctgctccccttcacttctgctatgagttagaagctccctgaag  
ccctcatcagaaacagatgctggcaccaggcttcttatacagcctgcagaattagaagccaaataaacctctttttaa  
aaatatattccccagcctcaagtattcctttat-agcaatgca-aatggactaagaca---TATAT---AAAATCAGA  
AGATTGGATCTTCCAACCCCTCCCCAGAATAGCAAAGCTAGAAATATGGAAGAAGCAATCCCAGTTTTTATAAAT  
GGT-AAAAGCTGTAAATTTTGCAGTGAATTTTATACATG---TTTATTACAGCAGAGAAATCGTGTATTTCAGCT  
CCTC-TTTTT-ATTGCTAGGAAGCCTCACAGAATTACAACCAGTGAAATATTCCCCTTTTCTCT

>Bushbaby

AAA--CTTTTGTCCCTCTAGTACTATGGAGCCTAGGAAGCAA--CTTCCCCTGCCTTGTAAATGGG-----  
---GCAAGCCATATTACCACTGGCAAAGAAGAGTTTTCCATGC-TAATTCCTCTCAGCCAAGCAATCAGTTTGAATTAA  
A-----  
-----  
-----  
-----  
-----  
-----  
-----  
-----  
-----  
-----  
-----

-----AATAT---CAAATCAGA  
ATATCAAATTTTCTAGTCCCCTCCCCAGAATAACAAACCTTGAAACATGTGATAAGCAATTCAGTTTTGATAAAT  
GGT-TAAACTGTAAATTTTGCAGTAAATTTTATATATAGTTTTTTTACCACAGAGCAATCATGTCATTTCTTGCT  
GTTT-TTTT-ATTGCTAGTAAGCTACAAAGAATTACAAT-AGTGAAATATTCCCCTTTTCTCT

>Mouse\_lemur

ATATTCTTTTGAACAGCAAGTGACATGGAGGCAGGGAGGCCAAAACCTTCCCCTGCCTTATAATGGG-----  
---GTGACCCGTGTCAACATCAGCAAGGGAGAGCTACCCTCG-TAATTCCTCTGAGACGAGCAATCAATTTTAACTA  
A-----



## Marker M93

>MSTB1

```
-----tgctata--  
-----  
-gtttggatgtttgtcccctcc-----aaacctcatggtgaaatttgatccccagtggtggaggtg  
gggcctaataaggaggtgtttgggtcatggggcgagatccctcatgaatagattaatgccctccctcgggggtggggatg  
agtgagttctcactctattagttcccgcgagagctggttgt--taaaaagagcctggcacctccctcctctctctt  
gcttcctctctcgccatgtgatctctgcacacgccggtcccttcaccttcgccatgagtggaagcagcctgagggc  
cctcaccagaagcagatgctggcgccatgcttctgtacagcctg----cagaaccgtgagccaaataaacctctt  
tctttataaattaccagcctcaggtattcctttatagcaacacaaaatggactaagaca-----  
-----
```

>Human

```
GAGTTGACACTGAGATGATCACTAGTTTTCTTGGCAGAATGGCAAGGTCATAATTCACAAAGTTGTGAGGGC-----  
-----TGGGAGAAGAGAAAATGCAGACAACAATGTAGG---CTACT---tgctata--  
-ggttgatatttgactctcc-----taacctcatggtgacattagatccccagtgctggaggtg  
gggcctaataaggaggtgtttgggtcatgggagtagaagccttatgaattgtgtggtgtcatcctca----tggaatg  
agtcagttcttgctctatttgttccctgccagtgccctggttgt--gaaaaagagcctggcacctccccagcccc----tt  
gcttcctttctcaccatgtgatctcagtacatgctggctttgcttcaccttcaccatgagtggtggcagcctgagct  
cctcattagaagcagatgctgggtgccatttttctgtacaacctgcagaacagaactgtgagccaaataaacctgttt  
tctttatcaattaccaggtcaggtattccttcagagcaa-tgtaaatggactaaggta---TTATT---CTTGTAG  
AACGCTACTTTTGCAGAAGAAGCCCC-----CAAAAAGAGAAGGATGGGACGATACCTGGAAAGGATGCATACAAC-  
ACATGT
```

>Chimp

```
AAGTTGACACTGAGATGATCATTAGTTTTCTTGGCAGAATGGCAAGGTCATAATTCACAAAGTTGTGAGGGC-----  
-----TGGGAGAAGAGAAAATGCAGACAACAATGTAGG---CTACT---tgctata--  
-ggttgatatttgaccctcc-----taacctcatggtgacattagatccccagtgctggaggtg  
gggcctaataaggaggtgtttgggtcatgggagtagaagccttatgaattgtgtggtgtcatcctca----tggaatg  
agtcagttcttgctctatttgttccctgccagtgccctggttgt--gaaaaagagcctggcacctccccagcccc----tt  
gcttcctttctcaccatgtgatctcagtacatgctggctttgcttcaccttcaccatgagtggtggcagcctgagct  
cctcattagaagcagatgctgggtgccatgtttctgtacaacctgcagaacagaactgtgagccaaataaacctgttt  
tctttatcaattaccaggtcaggtattccttcagagcaa-tgtaaatggactaaggta---TTATT---CTTGTAG  
AAGGCTACTTTTGCAGGAGAAGCCCC-----CAAAAAGAGAAGGATGGGACGATACCTGGAAAGGATGCATACAAC-  
ACATGT
```

>Orangutan

```
GAGTTGACACTGAGATGATCACTAGTTTTCTTGGCAGGATGAAAAGGTCATAATTCACAAAGTTGTGAGGGC-----  
-----TGGGAGAAGAGAAAATGCAGACAACGATGTAGG---CTACT---tgctata--  
-ggttgcatatttgaccctcc-----taacctcatggtgacattagatctccagtggtggaggtg  
gggcctaataaggaggtgtttgggtcatgggagcagaagccttaggaattgtgtggtgtcatcctca----cggaatg  
agtcagttcttgctctatttgttccctgccagtgccctggttgt--gaaaaagagcctggcacctccccaacccc----tt  
gcttcctttctcaccatgtgatctcagtacatgctggctttgcttcaccttcaccatgagtggtggcagcctgagct  
cctcattagaagcagatgctgggtgccgtgtttctgtacaacctgcagaacagaactgtgagccaaataaacctgttt  
tctctatccattaaccaggtcaggtattcctttagagcaa-tgtaaatggactaaggta---TTGTT---CTTGTAG  
AAGGCTACTTTTGCACAAGAAGCCCC-----CAAAAAGAGAAGGATGGGATGATACCTAGAAAGGATGCATACAAC-  
ACATGT
```

>Baboon

```
GAGTTGACACTGAGTTGATCACTAGTTTTCTTGGCAGGATGCCAAGGTCATAGTTTCACAAAGTTATGAGGGC-----  
-----TGGGAGAAGCAAAAATGCAGACAACGATGTAGG---CTAGT---tgctata--  
-gtttgcatatttgaccctccttgcatatttgaccctcctaactcatggtgacatttgatccccagtggtggaggtg  
gggcctaataggaggtgtctgggtcatgggagtagaagccttatgaatggtgtggtgtcatcctca----ccataatg  
agtcagttcttgctctatttgttccctgccagtgccctgctgt--gaaaaagagcctggcacctccccaacccc----tt  
gcttcctttctcaccatgtgagctcagtacatgctggctttgcttcaccttcaccatgaggg--ggcagcctgagct  
cctcattagaagcagatgctgggtgccatgtttctgtacagcctgcagaacagaactgtgagctgaataagcctgtct  
tctttatcaattaccaggtcaggtgttctttggagcaa-tgcaaatggactatggca---TTATT---CTTGTAG  
AAGGCTACTTTTGCACAAGAAGTAGCCTTCAACAAAAGAGAAGGATGGGATGATACCTTAGAAAGGATGCATACAAC-  
ACATGC
```



>Dog

TAACTGGCAGTTAGATGATGGTGGGTTTTCTTCCACAAGGTGCCAAGGCCACCATTTCAGGGGGTTGTGAGGATAGAAAG  
CAGTTGATCTCATTGAAGAATTAATGGGAGGAGTACAAACAGAGACATTGATGTAGA-----

-----  
-----  
-----  
-----

-----CCATT---CATATAG  
AAGGCTACTCTTGTA--AGAAGCCCAA-----CACGAAGAG---GACAAGATAGTACCTAGAGGGGAGGCATACAAC-  
TGACAT

>Horse

GAGCTGGCAATTAGATGATCGTTGGTTTTTCTTGCAGGGTGGCAAGGCCGTATTTAGTGGAGTTGCGAGAGCAGAAA-  
-AGTTTGTATAATTTCAAGAATGAATGGGAGGAGAGAAAATGGAGACAATGACGTAGG-----

-----  
-----  
-----  
-----

-----CCACC---CGTGTAG  
AAGGCTACTCTTGTA--GGAATCCCAA-----CACAAAAGAAGGACAAGCTGGTACCTAGAGGGGATGCATACACC-  
AGATTT

## Marker M94

>MSTB1

```
-----  
-----  
--tgctatagtttggatgtttgtcccctccaaacc--tcatggtgaaatgtgatcccagtggtggaggtggggccta  
atgggaggtgtttgggtcatggggcgatccctcatgaatagattaatgccctccctcgggg-tgggga-tgagtg-  
---agttctcactc-tattagttcccgcgagagctggttgtt-----aaaaagagcctggca---cctccc  
tcctctctctcttcttctctctcgcacatggtgatctctgcacacgcggctccccttcaccttcggccatgagtgga  
agca-----gcctgaggccctcaccagaagcagatgctggcgccat  
gcttctgtacagcctgcagaaccgtgagccaaataaacctcttttctttataaattaccagcctcaggtattcctt  
tatagcaacacaaaatggactaagaca-----  
-----  
-----  
-----
```

>Human

```
TCTCGTAAACACCCCTCAAATCTGTCCTCTGTGCTCTGTCTCCAACACTGAGTTTGGAGCAGGCTAAGTTTTAGGCCT  
CGTTAGCCTGGACAACCTGCTG-----CCTCCTAATGGGTC-----TCCTATATTCCCTC-TTA---CCCTC-  
--cgctatagtttggatgtttgtcccctaaacctcttcatggtgaaagtcatcccagtggtggaggtggggccta  
atgggaggtgtttgggcatggaagtgaatccctcctgagtagattaacgccttctgtgggg--tggg---tatgag-  
-tgagctctcattcttcttagttcccacatgagaactggttgtt----aaaaaaaaaaaaaagcctggaatttcccccc  
accctcaactcttgcttctctcttccaatggtgatctctgcacacgctggctccctgtaacttctgtcatgagtgga  
agcatctgcatccagatgcttgactcaaacttaggtcctgtccgtgagtggtcctccaggtgcagatgc-caaatctt  
gaacttttctag-caacagaatctcgagccaaa-gaaaccttttttctttataaattccccagcctcagatattcctt  
tatagcaacactaaatgcattaaggca---CCCTC---TGAA-AACCTATTCTCCACACTGAAGCCATAGTGATCTTT  
TAAA-ACAC-----TTAAGGG-----CTTAAAGCCCTTTGGGCATT-CCTATTTTCTT  
AAGATGAAGACAAAGTCCTTTGCTGCCTGGCATGGCCCTGTGTGGTCAAGCTGCTCTGCATCCTCCTCCTCCCATT  
ACTCCCTTGTCTTTTGGGCCCAACAACCTTGCCCCACTTTTATTCTTCCAGTGTGCTGTGATCCATCCAGCCACATG  
GCCTGCGCACATGCCATTCTCTGCCTG
```

>Orangutan

```
TCTCCTAAACACCCCTCAAATCTGTCCTCTGTGCTCTGTCTCCAACACTGAGTTTGGAGCAGGCTAAGTTTTAGGCCT  
CTTTAGCCTGGACAACCTGCTG-----CCTCCTAATGGGTC-----TCCTATATTCCCTC-TTA---CCCTC-  
--tgctatagtttggatgtttgtcccctaaacctcctcatattgaaagttgatcccagtggtggaggtggggccta  
atgggaggtgtttggggcgtggaagtgaacctcctcatgagtagattaacgccttctgtgggg--tggg---tatgag-  
-tgagctctcattcttcttagttcccacatgaaaactggttgtt-----aaaaaaaaaaaaaagcctgaaatttcccccc  
accctcaactcttgcttctctcttccaatggtgatctctgcacacgctggctccctgtaacttctgtcatgagtgga  
agcatctgcatccagacgcttgactcaaacttatgtcctgtccatgagtggtcctccaggtgcagatgc-caaatctt  
gaacttttctagacaacagaatcttgagccaaa-gaaaccttttttctttataaattccccagcctcagatattcctt  
tatagcaacactaaatgcattaatgca---CCCTC---TGAA-AACCTATTCTCCACACTGAAGCCATAGTGATCTTT  
TAAA-ACAC-----TTAAGGG-----CTTAAAGCCCTTTGGGCATT-CCTATTTTCTT  
AGGATGAAGACAAAGTCCTTTGCTTCCCTGGCATGGCCCTGTGTGGTCAAGCTGCTCTGCGTCCTCCTCCTCCCATT  
ACTCTCTTGTCTTTTGGGCCCAACAACCTTGCTCCACTTTTATTCTTCCAGTGTGCTGTGATCCATCCAGCCACATG  
GCCTGCGCACATGCCATTCTCTGCCTG
```

>Baboon

```
TATCCTAAACACCTCTCAAATCTATCTTCTGTGCTCTGTCTCCAACACTGAGTTTGGAGCAGTCTAAGTTTTAGGCCT  
CTTTAGCCTGGACAACCTGCTG-----CCTCCTAATGGGTC-----TCCTATATTCCC-----TCCTC-  
--tgctatagtttggatgtttgtctcccctaaacc---tcatggtgaaagttgatcccagtggtggaggtggggccta  
atgggaggtgttttagtgcggggaagtgaacctcctcatgagtagattaatgccttctgtggaa--tggg---tatgag-  
-tgagctcttattcttatttagttcccacatgaaaaccggttgttataaaaaaaaaaaaaaaaaaagcctggaatttcccccc  
acccccaacgcttgcttctctcttccaatggtgatctctgcacacgctggc-tcccataacttctgtcatgagtgga  
agcatctgcatccagacgcttgactcaagcttatgtcctgtccatgagtggtcctctgggtgcagatgc-ccagctt  
gaacttttctagacaacagaatcttgagccaaa-gaaaccttttttctttataaattccccagcctcggatattcctt  
catggcaacactgaatgcattaaggca---CCCTC---TGAA-AACCTATTCTCCACACTGAAGCCACCGTGATCTTT  
TAAA-ACATGTCTGTCTTGTG-----CTTAAAGCCCTTTGGGCCTT-CCTATTTTCTT  
AAGATGAAGACAGAGTCCTCTGCTGCCTGGCATGGCCCTGTGTGGTCAAGCTGCTCTGCGTCCTCCTCCTCCCATT  
ACTCCCTTGTCTTTTGGGCCCAACAACCTTGCTCCACTTTTATTCTTCCAGTGTGCTGTGATCCATCCAGCCACATG
```





>Mouse\_lemur

TCTACTAAACACCTCTGAAGTCCGTCCTCGGCTCTCCACCTCCAACATG-----GTAGT----GTTATAGGCTT  
CATTAGCTTGGACAACCTGCTGTAA----GCTCCTGAGTGGTC-----TCTGATATTCTCTC-ATA-----

-----CCCTC---TGCA-AATCTGTTCTCCACACTAAAGCCACAGCAATCTTT  
TAAA-C--TTTCCGTCCTGTG-----CTTAAAGCCCTTTGGACCTT-TCCATGTTCTT  
AAGATGAAGACAAAAACCTTTGCTGCCTGGCGTGGCCCTGTGTGGTCCAGCTGCTCTGCAGCCTCCTCTCCCCTGCTC  
ACTCCCTTGTCTTTGGGCTCCAACAACCTCCGTTGTTCTTTTCATTCTTCAAGTAGGCTGTGATCCATCAAGCCACAGG  
GCCTTGGCACATGCCCTTCTCTGCCTG

>Guinea\_pig

TCTCTTAAACAGCTCTCAAATCTATCTTTTGCTATCTTC-----  
-TTTAGCTTGGACAACCTTCTGTGATCTATTCTCTCTATCTATTCTGTCTTCTCTATTCTCTTGTAC-----

-----TATCC---AAAAGGATCTATTCTCCATACTGTAGCTAGGGTGATCTTT  
TTAG-AAACGTCTGTCTTGTGTTAAAAGCCCTTTGGCCTCCTCATTTTCTTAGCCCTTTGGGCGCT-CCCACTTTCTT  
AGGAGCAAGAGAAAATCTGTTGCTGCCTGACATGCTCCCTGCATGAGCAACT-ATTCTGCAGCCTTCTCTCCTCCAATC  
ACATCCTTGTCATTTTGGCTCTAACAACCTCACTTCTTCATTATCCT-CAAGTGGGTTGTGATTCATGCACCCACATG  
GCCTTGGCATATGCTGCCCTCTGATTT

>Dog

CCCCACCCGACTTCCCAAATCTGTTCTCTCTCAACTTCCAATAC-----TTTAGTCTAAGTCATAGGCTT  
ATCTAGCCTGCAAACTGCTGTGGCTTCTATCTTAGCTATTC-----TCATATATCCTCTT-TTA-----

-----TACCC---CAAAG--TCACTTCTCCACCCTGAAGCCACAGTGAACCTTT  
TAAAGAAATGTCTATCCTATG-----TTTAAAATCCCTGGGTCCTTCCCCATTTCTTT  
AGGATGAAGAACAAATCTTTTGCCATCCAGCCTGCCCTGTGTGCTCAAGCTGCTCTAGAAAATACT-----CCTCTC  
ACTCCTCTTGTCCCTGAATTCGAACACCCTGTTCTC--CATTCA-CAGGTGGGCTG-GAATTCTCCACCACATG  
GCCTTTGCACATGCTGTTCTCTTTCTG

>Horse

CCC-----AATCTGTCCTTTCTCTCCATCTC AAAAC-----CTTAGGCTAAGTTATAATCTT  
CTCTCGCCTGGACAGCTGCTGTAGGTTCTGTCCTAACTGGTC-----TCCTGTATCCCCTT-TCA-----

-----CCCTC---CAAAA-ACCAGTTCTCCACCGTGAAGTCACAGTGATCTGT  
TTAA-AAATGTCTGTCTGTG-----CTTAAAACCTTTTGG-CCTT-CCCATTCCCTT  
AGGGTGGAGACAAAATCCTTTGCTGCCTGACTCGGCCCTGTGTGACCAAGCTGCCCTGCAGACTCCTCTCCCCATT  
CCTCCATTGTCTCTGGGCTCCAACAACCCTGCTCTTCTGTCACTCT-TCAGTGGGCTGTGAGTCATCCAGCCACAGG  
GCCTTTGCACACTCCCTTCTCTGCTTG

## Marker M95

>MSTB1

```
-----  
-----tgctatagtttgg  
atgtttgtccccctccaaacctcatggtgaaatttgatccccagtggtggagggtggggcctaataatgggagggtggttgggt  
catggggggcggatccctcatgaatagattaatgccctccctcgggggtggggatgagtgagttctcactctattagttc  
ccgcgagagctgggtggttaaaaaga-----gcctggcacctccctcctctc-----tcttgcttcc  
tctctcgccatgtgatctctgcacacgcccggctccccttcaccttccgcatgagtgggaagcagcctgagggccctcac  
cagaagcagatgctggcgccatgcttcttgtagcagcctgcagaaccgtgagccaaataaacctctttctttataaat  
taccagcctcaggtattcctttatagcaacacaaaatggactaagaca-----  
-----
```

>Human

```
GTCCACCTTTTGATTGATTTCTACACTTCCTTCAAATGTATCTCAAAGTTATGTGCAGTGTGAAATTTCCATAAAA  
TT-----ACAAAGAGCTTGTGCCTTTCTCCTCTTGGGCTTCTCAAGTAGGTTTA---CTCTC---tgatataggt-gg  
atatttgtgccctccaaacctcatattgaaacttgggtccccattggtggagggtggggcctgggtgagaggagtttgggt  
caaaaaggcagatcccccatgaacggccttgggtgccat-----tctcatcacattgagtaaattcttactcttatttc  
ccacatgatctgggtggttaaaaaaaaaaaaaaaaaaaaaa---gtccagcaccttcctcctttctccgtctcatccttcctt  
cctcttgccctgtgata-ctg---actccctggtgccttcgcttctgtcatgag-----gctctatgaggccctcac  
cagaaacagaagctggcgtcatgcttcttgtagcagcctgcagaac-----attttctttataaat  
taccagcctcagatattcctatatagcaacataa-atggactaagaca---CT-GAC---AAAAACATTTTT-ACT  
GCAGTTATTACT-TTTGTGATTTTTGACCAGGAGCTTCTCAAACACAGCATCCT
```

>Chimp

```
GTCCACCTTTTGATTGATTGCTACACTTCCTTCAAATGTATCTCGAAAGTTATGTCCAGTGTGAAATTTCCATAAAA  
TT-----ACAAAGAGCTTGTGCCTTTCTCCTCTTGGAGCTTCTCAAGTAGGTTTA---CTCTC---tgatataggt-gg  
atatttgtgccctccaaatctcatattgaaacttgggtcctcattggtggagggtggggcctgggtgagaggagtttgggt  
caaaaaggcagatccctcatgaacggccttgggtgccat-----tctcatcacattgagtaaattcttactcttatttc  
ccacatgatctgggtggttaaaaaaaaaaaaaaaaaaaaaaagtccagcaccttcctcctttctccgtctcatccttcctt  
cctcttgccctgtgata-ctg---actccctggtgccttcgcttctgtcatgag-----gccctatgaggccctcac  
cagaaacagaagctggcgtcatgcttcttgtagcagcctgcagaac-----attttctttataaat  
taccagcctcagatattcctatatagcaacataa-atggactaaggca---CT-GAC---AAAAACCTTTTTTACT  
GCAGTTATTACT-TTTGTGATTTTTGACCAGGAAGCTTCTCAAACACAGCATCCT
```

>Orangutan

```
GTCCACCTTTTGATTGATTTCTACACTTCCTTCAAATGTATCTCAAAGTTATGTCCAGTGTGAAATTTCCATAAAA  
TT-----ACAAAGAGCTTGTGCCTTTCTCCTCTTGGAGCTTCTCAAGTAGGTTTA---CTCTC---tcatatagtc-ag  
atatttgtccccctccaaatctcatattgaaacttgggtccccattggtggagggtggggcctgggtgagagtagtttggat  
caaaaaggcagatccctcatgaacggccttgggtgacat-----tctcatcacattgagtaaattcttactcttatttc  
ccacaagatctgggtgattaaaaaaaaaaaaaaaaaaaaagag---tccagcaccttcctcctttctccgtctcatccttcctt  
cctcttgccatgtgatg-ctg---actccctggtgccttcgcttctgtcatgag-----gccctatgaggccctcaa  
cagaaacagaagctgggtgtcatgcttcttgtagcagcctgcagaac-----attttctttataaat  
taccagcctcagatattccaatatagcaacataa-atggactaagaca---CT-GAC---AAAAACCTTTTTTACT  
GCAGTTATTACT-TTTGTGATTTTTGACCAGGAGCTTCTCGAACACAGCATCCT
```

>Baboon

```
CTCCAACCTTTTGATTGATTTCTACACTTCCTTCAAATGTATCTCAAAGTTATGTCCAATGTGAAATTTCCATAAAA  
TT-----ACAAAGAGCTTGTGTCTTTCTCCTA-TGAGCTTCTCAAGGAGGTTTA---CTCTC---tgatataggt-gg  
atatttgtccccctccaaatctcatattgaaaattgggtcctcagtggtggagggtggggcctgggtgagaggagtttgggt  
caaaaaggcagatccctcaagaatggccttgggtgcat-----tctcatcagattgaggaaattcttactcttatttc  
ccacaagatctggcag-----aagaaaaataaaaaa---gtctagcaccttcctcctttctctgtctcatcattcctc  
cctcttgccatgtgatg-ctg---actccctggtgccttccttctgcatgag-----gccctatgaggcccttac  
cagaaacagatgctgggtgtcacgcttcttgtagcagcctgcagaac-----attttctttataaat  
tacctggcctcaggtattcctatatagcaacataa-atggactaagaca---CT-GAC---AAAAACCTTTTTTACT  
GCAGTTATTACT-TTTGTGATTTTTGACCAGGAGTTTCTCAAACACAGCATTCT
```

>Rhesus

```
CTCCAACCTTTTGATTGATTTCTACACTTCCTTCAAATGTATCTCAAAGTTATGTCCAATGTGAAATTTCCATAAAA  
TT-----ACAAAGAGCTTGTGTCTTTCTCCTA-TGAGCTTCTCAAGTAGGTTTA---CTCTC---tgatataggt-gg  
atatttgtccccctccaaatctcatattgaaaattgggtccccagtggtggagggtggggcctgggtgagaggagtttgggt  
caaaaaggcagatccctcaagaatggccttgggtgcat-----tctcatcagattgaggaaattcttactcttatttc  
ccacaagatctggcagaaaaa-----gtctagcaccttcctcctttctctgtctcatcattcctc
```



```

-----
-----
-----
-----
-----AT-GAA-----AAA-----
---ATTACTACTTTTTGTGA-TTTGAACCCAAAGTTTCTTAAATGCTACACTCT
>Guinea_pig
CTTCGTTTTGACTGCCTCTTTACTT-GTCCTTAAAATGTATCTCAAAA-TTATAC-TAGTATTATAATTCCCATA-AA
TT-----TCCAAAGTATTTCTACTTCTTACTGCTTTCAATGAAAACCATGAATA-----
-----
-----
-----
-----
-----CTTGAC-----AAAATCTCCTTTGCT
GCTATTATTCT-----GTGG-TTTACATTCAGAGCTCC--AATGCAGCATTCT
>Dog
CCCCACCTTTTGATTGATTTCTACTCATCCTTCAAATGTATCTCAAAAGTTATTTCTAGTGTGAAATTTCCCATAAAA
TT-----ACAAAGAGCTTGCTGCTTCCTCCTC-TGAGCTCCCTGGGATAGGTTT-----
-----
-----
-----
-----
-----GAC-----AAAACCTCCTTTTCT
GCAATTATTACTCTCTGCAA-TTTTCACTGGAAGTTTCTCAAATGCAGCCTTCA
>Horse
TCCCACCTTTTGATTGATTTCTACTCATCCTTCAAATGTATCTCAAAAGTTATTTCCAGTGTGGAATTTCCCATAAAA
TT-----ACAAAGAGCTTGCTGCTTCCTTCCC-TGAGCTCCCTGGGCAGGTTTA-----
-----
-----
-----
-----
-----CT-GAC-----TAAACCTCCTTTACT
GCAATTATTCT-TCTGTGA-TTTTCAGCCAGAGTTTCTCAAATGCAGCCTTCT

```









## Marker M102

>MSTB1

```
-----  
-----tgctatagtttggat-gtttgtccctcc  
aaacctc-atgttgaaatttgatccccagtggtggaggtggggcctaataaggaggtggttgggtcatggggcggatc  
cctcatgaatagattaatgccctccctcgggggtgg-ggatgagtgagttctcactctattagttcccgcgagagctgg  
ttgttaaaaagagcctggcacctc-----cctc-ctctctctcttgcctcctc-tcg  
ccatgtgatctctgcacacgccggctcccccttcaccttccgcatgagtggaagcagcctgaggcctcaccaga---  
agcagatgctggcgcca-----  
-----  
-----  
-----  
-----tgcttcttgtacagcctgcagaaccgtgagccaaataaacctcttttctttataaatta  
cccagcctcaggtattc-----ctt-----tatagcaacacaaa  
atggactaagaca-----  
-----
```

>Human

```
CATCTGGTTCATCTAGCATGTGGGGCTGTGAGCAGGA---GTGTGCCCTGAGAGGACAAATTCTTG---AAGACTCC  
ATCCCTG--TAAAGAATGTCACACTGCTGC-TGCGTAT---GGTTG---tggtgtagtttggat-gtttgtctcctcc  
aaatatic-gtgcgtgaaatctgatccacagtggtggagatggggcctaacggggagccatctttagtcacaggggttaatc  
cttcatgaatagattaatgccctccct--gggtgggggataagtgagttctcactctggttcttctgtaggagctgg  
ttgctgaaaagagcctagcgcctc-----ccctctctctcttgcctcctctcaccatg  
-----tgatctctgcacatgccagctcccccttcacctgctgtcacgagtggaagcagcctgaggctttcaccagatac  
ccaatcttttagacacgagaactgtgagccaaataaattc-----  
-----  
-----  
-----  
-----tttttttaataaatta  
cccagcctcaggtattc-----ctacta-----tatagcaacacaaa  
-tagacttagaca---AGCTG---GTA--ATAAAGCCC-TCAAGGGCTAATGAGAGAAGTATGTGCTTTGGAGTCAGA  
AACTCCTGAGTTTTAGGCTTGGCTATGTCACCTTGCTAACTGTGAGACTTG
```

>Chimp

```
CATCTGGTTCATCTAGCATGTGGGGCTGTGAGCAGGA---GTGTGCCCTGAGAGGACAAATTCTTG---AAGACTCC  
ATCCCTG--TAAAGAATGTCACACTGCTGT-TGCGTAT---GGCTG---tggtgtagtttggat-gtttgtctcctcc  
aaatatic-gtgcgtgaaatctgatccacagtggtggagatggggcctaacggggagccatcttgggtcacaggggttaatc  
cttcatgaatagattaatgccctccct--gggtgggggataagtgagttctcactctggtcgttcttctgtaggagctgg  
ttgctgaaaagagcctagcgcctc-----ccctctctctcttgcctcctctcaccatg  
-----tgatctctgcacatgccagctcccccttcacctgctgtcatgagtggaagcagcctgaggctttcaccagatac  
ccaatcttttagacaccagaactgtgagccaaataaattc-----  
-----  
-----  
-----  
-----tttttttaataaatta  
cccagcctcaggtattc-----ctacta-----tatagcaacacaaa  
-tagacctagaca---AGCTG---GTA--ATAAAGCCC-TCAAGGGCTAATGAGAGAAGTATGTGCTTTGGAGTCAGA  
AACTCCTGAGTTTTAGGCTTGGCTATGTCACCTTGCTAACTGTGAGACTTG
```

>Orangutan

```
CATCTGGTTCACCTGGCACTTGGGAATGTGAGCAGGA---GTGTGTCCTGAGAGGACCAATTCTTG---AAGACTCC  
ATCCCTG--T-AAGAATGTCACACTGCTGT-TGCATAT---GGCTG---tggtgtagtttggat-gttcgtctcctcc  
aaatatic-gtgcgtgaaatccgatccacagtggtggagatgggtgcctaataaggagccatcttgggtcacaggggttaatc  
cttcatgaatagattaatgccctccct--gggtgggggataagtgagttctcactctggtcgttctcgtgggagctgg  
ttgctgaaaagagcctagcacctc-----ccctctctctcttgcctcctctcaccatg  
-----tgatctctgcacatgccagctcccccttcaccttctgtcatgagtggaagcagcctgaggctttcaccagatac  
ccaatcttttagacaccagaactgtgagccaaataaatt-----  
-----  
-----
```

-----  
-----ttttttaaataaatta  
cccaacttcaggtattc-----ctac-----tatagcaacacaaa  
-tagacttaggca---AGCTG---GTA--ATAAAGCCC-TCAAGGGCTAATGAGAGAAGTATGGGTTTTGGAGTCAGA  
AACTCCTTAGTTTTAGGCTTTGGCTATGTCACTTGCTAACCGTGAGACTTG

>Baboon

CATCTGATTGAGCTGGCATGTGGGGCTGTGGGCAGGA---GTGTGCCCTGAGAGGACAAATTCTTG---AAGACTCT  
ATCCCTG--T-AAGAATGTCACACTGCTGC-TGCATAT---GGCT-----gtgtagtttgat-gtttgtctcctcc  
aagtatc-gtgcgtgaaatctgatccacgggtgttggaggtggggcgtaatgggagccattttgggtcacaggggttaatc  
cttcacgaatagatgaatgccttcct--gggtgggggataagtgagttctcactctgttgggtccttggggagctgg  
ttggtgaaaagagcttagcgcctt-----ccctctctctcttggcttccctctctcaccatg  
-----tgatctctgcacatgccagctccccttcaccttctgtcacgaatggaagcagcctgaggccttcaccagatac  
ccaatcttttagacaccagaactgtgagccaaataaattc-----

-----attttttaaataaatta  
cccagcctcaggtattccctgaggctactatagaaacacaaatagacttatttaaataggctatttataacaacacaaa  
-tagacttagaca---GGCTG---GTA--ATAAAGCCC-TCGAGGGCTAATGAGAGAAGTAGGGGCTTTCGAGTCAGA  
AACTCCTGAGTTTTAGCCTTTGGCTCTGTCACTTGCTAACCGTGAGACTTG

>Rhesus

CATCTGATTGAGCTGGCATGTGGGGCTGTGGGCAGGA---GTGTGCCCTGAGAGGACAAATTCTTG---AAGACTCT  
ATCCCTG--T-AAGAATGTCACACTGCTGC-TGCATAT---GGCT-----gtgtagtttgat-gtttgtctcctcc  
aagtatc-ctgcgtgaaatctgatccacgggtgttggaggtggggcgtaatgggagccattttgggtcacaggggttaatc  
cttcacgaatagatgaatgccttcct--gggtgggggataagtgagttcttactctgttgggtccttggggagctgg  
ttggtgaaaagagcttagcgcctt-----ccctctctctcttggcttccctctctcaccatg  
-----tgatctctgcacatgccagctccccttcaccttctgtcacgaatggaagcagcctgaggccttcaccagatac  
ccaatcttttagacaccagaactgtgagccaaataaattc-----

-----attttttaaataaatta  
cccagcctcaggtattccctgaggctactatagaaacacaaatagacttatttaaataggctatttataacaacacaaa  
-tagacttagaca---GGCTG---GTA--ATAAAGCCC-TCGAGGGCTAATGAGAGAAGTAGGGGCTTTCGAGTCAGA  
AACTCCTGAGTTTTAGCCTTTGGCTCTGTCACTTGCTAACCGTGAGACTTG

>Marmoset

CATCTGATTGATT-GGCACGTGGGGCTGTGGGC-----CGGACAAATTCTTG---ACGACTCC  
ATCGCTG--T-GAGAATGGCACACTGCTGT-TGCATTT---GGCTG---tggtgcagtttgat-gtttgtctcctcc  
aaatatcaatgctgaaatctgatccacagtgctcagaggtggggcctaataatgggagccattttgggtcacaggggttaatt  
cttcacgaatagattaatgccttcct--agggtgggggataagtgaattctca--ctgttagttcctgtgggagctga  
tgattgaaaagagcctaatagcctc-----ccctgtctccttggcttccctctctcaccatg  
-----tgatctctgcacatagcagctccccttcaccttctgtcacgagtggaagcagcctgaggccttcaccagatac  
ccaatcttttagacaccagaactgtgagccaaatcaataAATTCTTTTTTTTCTTTCTTTCTTTCTTTTTTTTTTTG  
CGATGGAGTCTTGCTCCATCTCCAGGCTGGAGTGCAGTGGCACAATCTTGCTCACAGCAACCTCCGCCTGTGAGGTT  
CAAGCAATTCTCCTGCCTCAGCCTCCCAAGTAGCTGGAACCTACAGGCACCTGCCATCACTCCAGCTGATTTTTTTGTA  
TTTTTAGTAGAGACAGGGTTTACCATGTTGGCCAGGATGGTCTCGATTTCTTGACCTTAAGATCCACCCACCTGGCC  
TCCCCAAGTGCTGGGATTACAGGCATGAGCCACTGTGCTCCACCAAATTCTTTTTTTTTTTTTTTTTTTTtaataaatca  
cccagcctcaggtattc-----cct-----tataacaacacaaa  
-tagactgagacg---GGCTG---GTA--ATAAAGCTCATTAAAGGATAATGAGAGAAGTGTGGGCTTTGGAGTCAGA  
AACTCCTGAGTTTTAGCCTTTGGCTCTGTCACTTGCTAACCGTGAGACTTG

>Tarsier

CATCTGGTTTATCTGGCATGTGACACAGAGGCAGGAAA--GTGTGCTCTTAGGGGACAGAATCTTG---AAGACCCC  
ATTGCCG--T-CAGAATGTCGCATTACTGG-GGCATAT---AGCTG---tgctatactttggat-gctcattccctcc  
aaatctc-atgctaaaatttgatccccagtggttggagat-gtgcctactgggaggtatttgggtcatggggatgaatc  
cctcaggaatagattaatgcctctct--gggtggggga-gagttacttctcactctattagttcctgagagagctgg  
ttggtcacatgagcctggaacctctctctctctctctctctctctctctctctctctctctctctctctctctcaccatg  
-----caatctctgctcatgtcagctcccctttgactta---catgagtggaacagcctgaggatttcaccatccat



-----AGCTG---CTACCTCAAAGTCC-TCCAGGGGCATGGGGAGGATCACGGGCTGTGGAGTCAGA  
AAGTCCGGAGTTTGAACCCTGTCTCGGTCACTTGCT-----AACTGTG

>Horse

CATCTGGTTCCTCTGAGGGGTGGGGCTATGGAGGGGAG--GTGTGCCCTGAGAGGTCATG-----GAGACTCC  
GTCCCA--T-CAGAACATCACATTGCTGGGTGTGTCC-----

-----CGCTG---GTGCCATAAAGTCC-TCCAGGGATAAGGGGAGGAGCGTGGGCTCTGGAGTCAGA  
CACTCCTGAGTTCAAACCTTGGGTCTGTCACTTGGTAACTGCGAGACTTG

## Marker M290

>MSTC

```
-----  
-----tgctatggtttgaaatggttgcctcccaaaactcatg  
ttgaaacttaatccccaatgtggcagattgagaggtggggcctttaagaggtgattgggtcatgagggctctgcct  
catgaatggattaatccattcatggattaatggattaatggattaatgggttatcatgggagtgaggactgggtggcttt  
ataagaagaggaagagagacctgagctagcatgctcagccccctcgccatgtgatgccctgcccaccttgggactct  
gcagagagtccccaccagcaagaa-ggccctcaccagatgcggccccctcgaccttggacttcccagcctccagaactg  
taagaaataaatttcttttctttataaattaccagctctcaggtattctgttataagcaacagaaaatggactaagac  
a-----  
-----
```

>Human

```
TTAAAAAATTTGTTTCTGAAGAACATTTAATGACAAAGCACGGGATAAAAAGCATGAATTTCCAATTTTATAATAA----  
---ATGTTATCTGTATGTGTATATAAATT---ACCAG---ttctatggtttgaaatg----cccctccaaaattcacg  
ttgaaatttaatcccagtgaggcagattgagaggtggggaccttaaaaggtgattgggtcatgaaggctcctccct  
tatgaatggattaatctattcatggagtaatggattagtgggc-----actggtgggtttt  
acaagaagaag---agagacga-aataagtatgcttggccccctcaccaggtgataccct-----ggactct  
gaagacagtcctcaccagtaagaa-ggttctcactagatacagccccctcaaccttggacttctcagcctccgtaactg  
aaagaaataaaatccttttctttataaattaccagtttcaggtattctcttataaacaacagaaaatgagctaagac  
a---ACCAA---TATATAAATTTAGAGGTGTGGGGAAAGGCAGAGGTAAAGAGGGAGTGGGGAGAA-ACAGAACAAA  
A--ATAGCTTTACTATCCAGAGTTTATAGCTGATTTGTTTTTTTC
```

>Chimp

```
TTAAAAAATTTGTTTCTGAAGAACATTTAATGACAAAGCACGAGATAAAAAGCATGAATTTCCAATTTTATAATAA----  
---ATGTTATCTGTATGTGTATATAAATT---ACCAG---ttctatggtttgaaatg----cccctccaaaattcacg  
ttgaaatttaatcccagtgaggctgtattgagaggtggggaccttaaaaggtgattgggtcatgaaggctcctccct  
tataaatggattaatctattcatggagtaatggattagcgggc-----actggtgggtttt  
acaagaagaag---agagacca-aataagtatgcttggccccctcaccaggtgataccct-----ggactct  
gcagacagtcctcaccagtaagaa-ggttctcactagatacagccccctcaaccttggacttctcagcctccgtaactg  
aaagaaataaaatccttttctttataaattaccagtttcaggtattctcttataaacaacagaaaatgagctaagac  
a---ACCAA---TATACAAATTTAGAGGTGTGGGGAAAGGCAGAGGTAAAGAGGGAGTGGGGAGAA-ACAGAACAAA  
A--ATAGCTTTACTATCCAGAGTTTATAGCTGATTTGTTTTTTTC
```

>Orangutan

```
TTAAAAAATTTGTTTCTGAAGAACATTTAATGACAAAGCACGGGATAAAAAGCACGAATTTCCAATTTTATAATAA----  
---ATGTTATCTGTATGTGTATATAAATT---ACCAG---ttctatggtttgaaatg----cccctccaaaattcaca  
ttgaaatgtaatcccagtgaggcagattgagaggtggggaccttaaaaggtgattgggcatgaaggctcctccct  
tatgaatggattaatctattcatggagtaatggattagtgggc-----actggtgggtttt  
ataagaagaag---agagacca-aataagtatgcttggccccctcaccaggtgataccctgtgctgcctcaggactct  
gcagacagtcctcaccagtaagaa-gcttctcactagatacagccccctcaaccttggacttctcagcctccataactg  
aaagaaataaaatccttttctttataaattaccagtttcaggtattctcttataaacaacagaaaatgagctaagat  
a---ACCAA---TACATAAATTTAGAGGTGTGGGGAAGGGCAGAGATAAACGGGTAGTGGGGAGAA-ACAGAACAAA  
A--ATAGATTTACTATCCAGAGTTTATAGCTGATTTGTTTTTTTC
```

>Baboon

```
TTAAAAAATTTGTTTCTGAAGAACATTTAATGACAAAGCACGGGATAAAAAGGCATGAATTTCCAATTTTATAATAAATGT  
TATATGTTATCTGTATGTGTATATAAATG---ACCAG---ttctatggtttgaaatg----cccctccaaaattcact  
ctgaaatctaattccccaatgaggcagattgagaggttaagaccttcaaaaggtgattgggtcatgaaggctcctccct  
tatgaatggattaatctatacacggagtaatggattagtgggc-----actggtgggtttt  
tt---aagaag---agagacca-aataagtagccttggccccctcaccagatgataccctatgctgcctcaggcctct  
gcagacagttctcaccagtaagaa-ggttctcaccagatgcagccccctcaacttggacttctcagcctccgtaactg  
aaagaaataaagccttttctttataaattaccagtttcaggtattctcttataaacaacaaaaataagctaggac  
a---ACCAA---TATATAAATTTAGAGGTGTGGGGAAGGGCAGAGATAAAAAGGGGAGTAGGGAGAA-ACGGAACAAA  
A--ATAGATTTACTATCCAGAGTTTATAGCTGATTTGTTTTTTTC
```

>Rhesus

```
TTAAAAAATTTGTTTCTGAAGAACATTTAATGACAAAGCACGGGATAAAAAGGCATGAATTTCCAATTTTATAATAAATGT  
TATATGTTATCTGTATGTGTATATAAATG---ACCAG---ttctatggtttgaaatg----cccctccaaaattcacg  
ttgaaatctaattccccaatgaggcagattgagaggttaagaccttcaaaaggtgattgggtcatgaaggctcctccct  
tatgaatggattaatctatacacggagtaatggattagtgggc-----actggtgggtttt
```









ACTAATTTTGC AAAATGGGTCTCAATGCAGCAGGTGACTGTACAACCTTAGTGAAAGTACT

> Baboon

TCTCTGGTCCTTGCTGCAAAGA-CTAC--TATATATCAAATAATGGCCA---TAATAACGAGGGGCTCTCTGTGAGGGG  
CTTTATGTACATTATCACATTGAATACTACAATG-----TATTTTAGGTTA-TCATAACC-----ATTCCC  
ACTTTTTACACAAATAACTTTACAGGTGAGAGAGGTAAAATGCTCTGTTCAAGTTACATAATGGGAAAATGGAGGCTC  
AAGTT----TGACTCTAAAC---CCCTG---tgctattggttgaatattgttcc--ccaaacttcatggtgaaact  
tgattccaaa-gttggaggtggggcctaataaggaaggtggttgggtcatgtgggtggattcctcatgagtggtggt  
gtgtcctcatggta----atgagtaagttcttgcctctgttagtttccaagagagcttgttgttaaaaagagcctggca  
cttccc---ccgagccctc-tgcctcctctcttaccatgtgc--tctgcacacaacagttccccttcaccttccacca  
tgagtgaagcttccctgagcccccttaccagaagcagatgctgggtgccatgctctggtagcagcctgcagaactgtgag  
ccaaataaacctcttttctttataaattaccagcctcaaatatttcttcttaaaaaacaca-aagggacacagacgt-  
--CCCTG---CTGTTAA-----ATACCCTGCATCTCTGCCTATATAAACAGATGAGATTTTGAATGATTGTCCTCA  
ATGCTAAAGGTCACAGA--TGTATCCCCACTTTTTCTGGTGTTTG--TTAGTTCTCATCATCCAC-----AT--TTT  
ATGGT--GGCAGGTGT-----TCAGCACACTGCTTAGACATGTGGCTGGTGGCTTGTGTCAACCCCTCTGGGG  
ACTAATTTTGC AAAATGGTTCTCAATGCAGCAAGTGACCGTACAGCTTAGTGAAAGTACT

> Rhesus

TCTCTGGTCCTTGCTGCAAAGA-CTAC--TATATATCAAATAATGGCCA---TAATAACGAGGGGCTCTCTGTGAGGGG  
CTTTATGTACATTATCACATTGAATACTACAATG-----TATTTTAGGTTA-TCATAACC-----ATTCCC  
ACTTTTTACACAAATAACTTTACGGGTGAGAGAGGTAAAATGCGCTGTTCAAGTTACATAATGGGAAAATGGAGGCTC  
AAGTT----TGACGCTAAAC---CCCTG---tgctattggttgaatattgttcc--ccaaacttcatggtgaaact  
tgattccaaa-gttggaggtgggtcctaataaggaaggtggttgggtcatgtgggtggatccctcatgagtggtggt  
gtgtcctcatggta----atgagtgagttcttgcctctgttgggttccaagagagcttgttgttaaaaagagcctggca  
cttccc---ccaagccctc-tgcctcctctctcaccatgtga--tctgcacacaacagttccccttcaccttccacca  
tgagtggaaacttccctgagcccccttaccagaagcagatgctgggtgccatgctctggtagcagcctgcagaactgtgag  
ccaaataaacctcttttctttataaattaccagcctcagatatttcttcttaaaaaacaca-aagggacacagacgt-  
--CCCTG---CTGTTAA-----ATACCCTGCATCCCTGCCTATATAAACAGATGATATTTTGAATGATTGTCCTCA  
ATGCTAAAGGTCACAGA--TGTATCCCCACTTTTTCTGGTGTTTG--TTAGTTCTCATCATCCAC-----AC--TTT  
ATGGT--GGCAGGTCT-----TCAGCACACTGCTTAGACATGTGGCTGGTGGCTTGTGTCAACCCCTCTGGGG  
ACTAATTTTGC AAAATGGTTCTCAATGCAGCAAGTGACTGTACAGCTTAGTGAAAGTACT

> Marmoset

TCTCTTGCTCTTGCCACAGAGA-CTAT--TGTATATCAAATAATGGCCA---TCATAACTAGGGGCTCTCTGTGAGAGG  
CTTTATGTACATGATCACATTTAATATTACAATT-----TTTTTAAGGTTATTCTTAGCC-----ATTCTT  
ACTATTTACACCAAGAACCTACAGGCCAAAGAGGTAGAGTGCTCTGTTCAATGTACATTATGGGACAATGGAACTC  
AAGTGTGTCTGACTATAAAGC---CCTTG---tgctattggttgaatggttgttcc--ccaaacttcatcgaaact  
tgctctccagagttggaagtggggcctaataagaaggtatttgggtcatgtgggtggatcttcatgagtggttgggtg  
gtatcctcatggta----atgagtaagctcttgccttgttagtttccaagagagctgggtgttaaaaagagcctggca  
cgtccc---cccagccctc-tgcctcctctctcaccatgtga--tctgcacacactagctcccttcatcttctgccc  
tgagtgggagcttccctgagcccccttaccagaagcggatggttgggtgccttgcctct-gtgcagcctgcagaattatgag  
acaaataaacctcttttctttataaagttatccagccttaggtatttcttcttaacagcaca-ggtggacaaatactc-  
--CCCTG---CTGTTAA-----ATACCCT-CATTCTGTGTACATAGACAGATGAGATTTTGAATGATTGTCCTCA  
ATGCTAAGGGCCACAGA--AGTATCCCCT-CTCTTCTAGTGTTTC--TTAGTGCTCATCAACCAT-----GC--TTC  
ATGTT--GGCAGGTCTTTCAGCTTGCCTCAGCACACGGCTCAGACATGTGGCTGGTGGCTTGTGTCAACCCCTCTGGGG  
ACTGATTTTGC AAAATGGGTCTCAATGCAGCACGTGACTATACAGCTTAGTGAAAGTACT

> Tarsier

GTTCTGGTTCTGGCTTCAAGGACCTAC--TGCATATGAAATGAAAATAATGTTAATCATGAGAACTCTTTGTGAGGGG  
TTTTATGTACATTATCACATTTAATATTTCCAAT-----TTTTAAGTCATTCTTAAACTTTATAAGGTTATTCTC  
ACTTTTTCAAACAATGAACATACAGTTTGGAGGAGCAAATGCTCTGCCAAGATCACATAGCAAGAAAATGGAAGCTC  
AGATTTGTCTGACTCTAAAGC---CCTTG---tcctatagtttgcagtggttgtccc--ccaaacctcatgctgaaatt  
cgattcccaatattagaagtgagaccaaattgggaggtggttgggtcatgggggtggattccttatgaatggttggatg  
ctgtcctcatggta----ataagtgagttcttgcctctattagttcctgtgagagctgggtatttaaaaagagctggca  
cctccctctccagctctctcttacttctcttccaccatgtaattctctgcacacatcagctctccttcaccttctatcc  
tgagtggagcttccctgaagtcct----gatgcagacactgggtgccatgggtccttgtacagcctgcagaactgtgag  
acaaataaacctc--tctttataaattacctagcctcagatggttcttcataacaacgaa-aatggactaaaaca--  
--CTCTG---CTATTAATCAATAAATATCCTGCATTCTGTGTACATAAGCAGATAAGATTTTGAATTATTGGCCTTA  
GCTTTAAGGGTCACAGA--TATATCTCCACTTTTTCTAACATTTTC--TTAGCTCTTGTCAATTGT-----CCCATTC  
ATGTG--GGCAAGTCTTCAGCT-----TGTTTCAGACACATGGCTGGCAGCGTGTGCCAACTCCTCCGGGG  
ACTAATTTTCGTAAGTGGATCTCAATGCAGCCAAGCACTATAGAACTTAATGGAAGGTGGT



Marker M116

>MSTB1

-----  
-----tgctatagtttgat-----gtttgtccctccaaacctcatggtgaa  
at ttgatccccagtggtggaggtggggcctaataaggaggtgtttgggtcatggggcgatccctcatgaatagatta  
atgccctccctcgggggtgggatgagtgagttctcactctattagttcccgcgagagctgggtggt-aaaaagagcct  
ggcacctccctcctctctctcttcttcc---tctctcgccatgtgatctctgcacacgcccggctcccttcaccttc  
cgccatgagtggaagcagcctgagggcctcaccagaagcagatgctggcgccatgcttcttgtacagcctgcagaacc  
gtgagccaaataaacctcttttctttataaattaccagcctcaggtattcc-----  
---tttatagcaacacaaaatggactaagaca-----

>Human

ACATACCTTGACCCAGCATTG-----AC-ACATAGTAAATGTG--CCCAATAAATGTTTGAACAATG---AATCAGT  
GGATGGATGAATGGATG---ATGAG---tgctatggtttggata----cagtttggccctagcaagtctcatggtgaa  
atgcaatcccctgtggtggagatggggcctggtgg-agggttctgatcatgggg-aaaatcccacatgaacatcttg  
gtgctgt-cctc---ccagtagtgagtgagttctcactcctaataagttcctacgaaaattgattgttttaaaaaagcct  
ggtacctcctcccttttgtctcttcttcc---ttctcttgccttgtgatgctg---atctccttccctt---ctgt  
tcatggaagcttctgaag-----c-cctcaccagaagtagatgctggcgccatgcttcttgtatagctctgtaaaact  
gtgtatcaaataaacctcttttcttataaaattgtccagctgcaggtaatcc-----  
--cttatagcaacacaaaaacggactaagaca---ATGAG---TCACA--TTTGTAAATGAAAAGTGTAGTCTTTGAAA  
ATTTGGC-GTGACTTACCTGG-----AGGTTTGTAAATAATTTGATCTACACAGGGTGACACAGGACAGCAA

>Chimp

ACATACCTTGACCCAGCATGTG-----AC-GCATAGTAAATGTG--CCCAATAAATGTGTGACCAATG---AATCAGT  
GGATGGATGAATGGATG---ATGAG---tgctatggtttggata----cagtttggccctaccaagtctcatggtgaa  
atgcaatcccctgtggtggagatggggcctggtgg-agggttctcatcatgggg-aaaatcccacatgaacatcttg  
gtgctgt-cctc---ccagtagtgagtgagttctcactcctaataagttcctatgaaaattgattgttttaaaaaagcct  
ggtacctcctcccttttgtctcttcttcc---ttctcttgccttgtgatgctg---atctccttccctt---ctgt  
tcatggaagcttctgaag-----c-cctcaccagaagtagatgctggcgccatgcttcttgtatagctctgtaaaact  
gtgtatcaaataaacctcttttcttataaaattgtccagctgcaggtaatcccttataaaattgtccagctgcaggtaat  
cccttatagcaacacaaaaacggactaagaca---ATGAG---TCACA--TTTGTAAATGAAAAGTGTAGTCTTTGAAA  
ATTTGGC-GTGAATTACCTGG-----AGGTTTGTAAATAATTTGATCTACACAGGGTGACACAGGACAGCAA

>Orangutan

ACATACCTTGACCCAGCATTG-----AT-GCATAGTAAATGTG--CCCAATAAATGTGTGAACAATG---AATCAAT  
GGATGGATGAACAGATG---ATGAG---tgctatggtttggata----cagtttggccctaccaagtctcatggtgaa  
atgcaatcccctgtggtggacgaggggctggtgg-agggttcttgatcatgggggcaaatcccacatgaacatcttg  
gtgctgtcctc---ccagtagtgagtgagttctcactctgatcggtcctatgaaaatcgattgttttaaaaaagcct  
ggtacctcctcccttttgtctcttcttcc---ttctcttgccttgcgatgctg---atctccttcccttctctgctgt  
tcatggaagcttctgaag-----c-cctcaccagaagtagatgctggcgccatgcttcttgtatagctctgtaaaact  
gtgtatcaaataaacctcttttcttataaaattggccagctgcaggtaatcc-----  
--cttatagcaacacaaaaacggactaagaca---ATGAG---TCACA--TTTGTAAATGAAAAGTGTGCCTTTGAAA  
ATTTGGC-GTCACTTACCTGG-----AGGTTTATAATAATTTGATCTACACAGGGTGACACAGGACAGCAA

>Baboon

ACGTACCTTGACCCAGCATTG-----AC-GCATAGCAAATGTG--CCAAATAAATGTGCGAAAAATG---AATTAAT  
GGATGGATGAACGGATG---ATGAG---cgctatggtttggata----cagtttggcctaccaagtctcatggtgaa  
gtgcaatccccatggtggaggtggggcctggtgg-agggttcttgatcatgggggtaaatcccacatgaacatcttg  
gtgctgtcctc---ccagtagtgagtgagttctcactcctaataagttcctaggataattgatagtttttaaaaaagcct  
ggtacctcctcccttttacctcttcttcc---ttctcttgcctggtgatgctg---atctccttcccttccgctgt  
gcgtggaagtttctgaag-----c-cctcaccagaagtagatgctggcgccatgcttcttgtatagctctgcaaagct  
gtgtgcaaagaaacctcttttcttataaaattgtccagctgcaggtaatcc-----  
--cttatagcaacacaaaaacagactaagaca---ATGAG---TCACA--ACTGCAATGAAAAGTGTAGTCTTTGAAA  
ATTTGGCAGTGACATACCTGG-----AGGTTTATAATAGTTTGTATCTACACAGGGTGACACAAGACAGCAA

>Marmoset

-----TTGACCCAGCATTG-----GT-GCATAGTAAATGTG--CCCAATAAATGTGTGAAAAATG---AACCAAT  
GGATGGATGAACGGGTG---ATGAG---tgctatggtttggaca--gtttgtctgtccctaccaggtctcatggtgaa  
atg--atccc-gtgggtggaggtggggcctggtgg-agggttcttgatcatgggggcaaatcctgcacgaacatcttg  
gtgcatcctc---ccagaagtgagtgagttctcactcctaataagttcctataagaatagattgttttaaaaaagcct





ctgcttggttaaa-agagccactcttctgtgcttccccctctcacc-----atgcgatctctgcacacacc  
ggcttccgcc----tcccaccatgagtggaagcagcctgaggccctctccagaagcaga---tgttcaattgtgaact  
ttccggccaccagaattgtgagccaaataaa-cctcttttcttcataaatcaccagcctcagatat--tgttatagc  
aacatthaatggactaagaca---ACAGT-----ATGCACACCCTTCTACCT-TGTGGGACTTC-AGAAAGGATTT  
GGTGAGAACAGAGATGTGAA

> Baboon

CTGGAACAACCCAAAGTGCAAGAGCCTGGCAGGGAAG-GGTCAGGGTCTCCCTCCTGACCTCACCGTGTAGGCTTCA  
AGCTCCTGCTCCGTTAAATGGAGGGGTTAGACCTGATGATGCCCAATACCACTGCCTGCTCTCAAGTGTGAATAAGC-  
---CCTAGGTGGGTACCTGGCCCTGCTGTTGGCTGGCCTG-----GGCAGGTGACCTGGCTTCTCTGAGCAACT  
CAGGTATCAG-AAAGGGTATG---AAAAC---tgccgtgg-ttggatgctgggccccttcaaact-catggtgaaat  
ctgattccctatggttagaggtggagtctaacaggagatggttgagttataggggcagatccctcatgaacaaataaat  
gcccttcttcaaggggtgatttctcactggttagttctca-----

-----ttacag  
ctgcctggttaaa-agagccattcttctgtgcttccccctctcacc-----atgcgatctctgcacacact  
ggcttctgcc----tcccaccatgagtggaagcagcctgaggccctcaccagaagcaga---tgttcaattgtgaact  
ttccggccaccagaattgtgagccaaataaa-cctcttttcttcacaaatcaaccagcctcagatat--tattatagt  
aacactcaatggactaagaca---ACAGT-----ATGCACACCCTTCTACCT-TGTGGGACTTC-AGAAAGGA-CT  
GGTGAGAGCAGAGATGTGAA

> Rhesus

CTGGAACAACACAAAGTGCAAGAGCCTGGCAGGGAAG-GGTCAGGGTCTCCCTCCTGACCTCACCGTGTAGGCTTCA  
AGCTCCTGCTCCATTAAATGGAGGGGTTAGACCTGATGATGCCCAATACCACTGCCTGCTCTCAAGTGTGAATGAGC-  
---CCTAGGTGGGTACCTGGCCCTGCTGTTGGCTGGCCTG-----GGCAGGTGACCTGGCTTCTCTGAGCAACT  
CAGGTATCAG-AAAGGGTATG---AAAAC---tgccgtgg-ttggatgctgggccccttcaaact-catggtgaaat  
ctgattccctatggttagaggtggagtctaacaggagatggttgagttataggggcagatccctcatgaacaaataaat  
gcccttcttcaaggggtgatttctcactggttagttctca-----

-----ttacag  
ctgcttggttaaa-agggccattcttctgtgcttccccctctcacc-----atgcgatctctgcacacact  
ggcttctgcc----tcccaccatgagtggaagcagcctgaggccctcaccagaagcaga---tgttcaattgtgaact  
ttccggccaccagaattgtgagccaaataaa-cctcttttcttcacaaatcaaccagcctcagatat--tgttatagc  
aacactcaatggactaagaca---ACAGT-----ATGCACACCCTTCTACCT-TGTGGGACTTC-AGAAAGGA-TT  
GGTGAGAGCAGAGATGTGAA

> Marmoset

CTGGAACAACAC-AAGAACAAGAGCCTGGCAGGGAAGATGTCGGGGTCTCCCTCCTGACCTCACCATGTTGGGCTTCA  
AGCTTCTGATCTGCTAAACGGAGGGGTTAGACCTGATGATGCCCAATACCACTGCCTGCTCTCAAGTCTGAATGAGC-  
---CTTAGATGGGTACCTGGTCTGCTGTTGGCTGGCCTGGGCCCTCGGGCAGGTGACATGGCTTCTCTGAGCAACT  
CAGGTATCAG-AAAGGGCTATA---AAAAT---tgccatgg-ttggatgctgggccccttcaaact-gatggtgaaat  
ctgatccccctatggtggagatggaatctaacgggagat-----atcacaggggcagatccctcatgaacaaataaat  
gctgttcttcaaggggtgagtcctcactggttggttcccaATTAGAGATACTTTTTTTTTTGGTTTTTGGATGAG  
GTCTCACACCATCGCATGGGCTGAAGTATAATGGCACGATCCCGGCTTACTGCAATCTCCACCTCCGAGGTTCAAACG  
GTTGTCCTGCCTTAGGCTCCTAAGTAGCTGGGATTACAGGTGCCCGCCACCACGCACAGCTAATTTTTTGTATTTTTAG  
TAGAGACGGGGTTTTACTGTGTTGGCCAGGCTGGTCTCGAATTCCTGACCTCATGATCCGCCCACTTCTGGCTtagag  
ctgcttggttaaa-agagccacttttgtacttccccctctgtcacc-----aggagatctctgcacacact  
ggttcttctgcc----tccctgctatgagtggaagcagcc-gaggccctcaccagaagcgga---tgttcaactgtgaact  
ttccagccaccagagttgtgagccaaataagccctcttttcttcataaatcaccagcctctgatat--tgttacagc  
aacacttcatggactaagaca---ACAGT-----ATGCACACCCTTCTACCT-CGTGGGACTTC-AGAAAGGATTT  
GGTGAGAGCAGAGACATGAA

> Tarsier

CTGG-----CAGGGAGGAGGTTGGGGTCTTTCT-----CCTCACCATGCTGAGCTCCT  
AGCACTCG-TCTGTCAAATGAAAGGGTTGGACTTGTGATGCCCAGCACT-CGCCCTGCTGTGAGGTCCGGATGAGC-  
---CCGAGAT-GGCCGCCCAA-CCTGCTG-TGGCTGGCTTATGCCCTT-GCTGGGCAACTCAGCTTCCCTGAGCAGCT  
CAGGTGTCC--AAGGGGCACC---GGGAC---tgctacagtttggatggtg---tccctcaaaactacatggttggac  
gtggcccctccagtcgaagggcggggccggtaggaggtatttgggtcat-ggggtggatctctcttgaatggaccaat  
gccctccctt---ggcacgtgctcactggttagttgct-----







## Marker M121

>MSTB1

```
-----  
-----tgctatagtttgggatggttgtccctccaaacctcatggtg  
aaatttgatccccagtggtggaggtggggcct-aatgggaggtggttgggtcatggggcggatccctcatgaataga  
ttaatgccctccctcgggggtggggatgag-tgagttctcactctattagttcccgcgagagctgggtgttaaaaagag  
cctggcacctccctcctctctc-tcttgcttctctctc--gccatgtgatctctgcacacgcggctcccttcacc  
ttccgccatgagtggaagcagcctgagggcctcaccagaagcagatgctggcgccatgcttcttgtagcagcctgcaga  
accgtgagccaaataaacctcttttcttta-----taaattaccagcctcaggtattcctttatagcaacacaaaat  
ggactaagaca-----  
-----
```

>Human

```
GACACTGT-GTTGCTCAGATCCCCCTTCAATGAAGGATTT-TTCCCC-----GTCACCTACCAGTCCCTTTAGGGATT  
-GCC--AATTGCAGAGAGCCACCT-A---CCCAC---tcctatggtttgcataatttgaccccaccaaactctcatggtg  
aaatctgatccccattggtggaggtggggcct-ggtgggaggtggttgggtcatccaggtggatccctcatgaatggt  
ttggtgcagtcgtcc---tggtgatgagttgagttcttactctcttggttcctgtgatagctgattgttaaaaagag  
cctggcaccttcc---cctcc-tgccttgcttctctc--accatgtgat--ctgcacatggtggcttcttcccc  
ttcctccatgcatggaagcagcttgagggcctccctagatgcagatgctggcaccatgcttcttgtagcagcctgtaga  
accatgagccaaatgaacctcttttcttta-----taaattaccagcctcaggtaatcctttatagcaatacaa-ac  
cgactgagaca---CCCAT---GGTCACCACATCCTTCCAGGGCGACA---TCCAGTGACT-AATTAATG--TGATA  
GTATACGGGTCTGGCTAT
```

>Chimp

```
GACACTGT-GTTGCTCAGATCCCCCTTCAATGAAGGATTT-TTCCCC-----GTCACCTACCAGTCCCTTTAGGGATT  
-GCC--AATTGCAGAGAGCCACCT-A---CCCAC---ttctacgtttggatatttgaccccaccaaactctcatggtg  
aaatctgatccccattggtggaggtggggcct-ggtgggaggtggttggagtcatccaggtggatccctcatgaatggt  
ttggtgcagtcgtcc---tggtgatgagttgagttcttactctcttggttcctgtgatagctgattgttaaaaagag  
cctggcaccttcc---cctcc-tgccttgcttctctc--accatgtgat--ctgcacatgtcagcttcttcccc  
ttcctccatgcatggaagcagcttgagggcctccctagatgcagatgctggcaccatgcttcttgtagcagcctgtaga  
accatgagccaaatgaacctcttttcttta-----taaattaccagcctcaggtaatcctttatagcaatacaa-ac  
cgactaagaca---CCCAC---GGTCACCACATCCTTCCAGGGCGACAGACATCCAGTGACT-AATTAATG--TGATA  
GTATACGGGTCTGGCTAT
```

>Baboon

```
GACA--GT-GTTGCTCAGATCCCCCTTCAATGAAGGACTT-TTCCCCTAGTTATCACCTACCAGTCCCTTTGGGGATT  
-GCC--GATTGCAGACAGCCACCT-A---CCCAC---tcctatggtttggatatttgaccccactgaatctcatggtg  
aaatctgatccccattggtggaggtggggcct-ggtgggaggtgctggagtcac-----gtc  
ttggtgccgtcttcc---tcgtaatgagttgagttcttactctatttggttcctgtgatagctgggtgttaaaaagag  
cctggcaccttcc---cctcc-tgccttgcttctctc--accatgtgat--ctgcacatgtcagcttcttcccc  
ttcctccaagtgtggaagcagcttgagggcctccctagatgcacatgctggcaccatgcttcttgtagcagcctgcaga  
accatgagccaaatgaacctttttcttta-----taaattaccagcctcaggtaatcctttatagcagtacaa-ac  
tgactaagacg---CCCAC---GGTCAGCACATCCTTCCAGGGCGACAGACATCCAGTGACT-AATTAATG--TGATA  
GTATACAGGTCTGGCTAT
```

>Rhesus

```
GACA--GT-GTTGCTCAGATCCTCCTTCAATGAAGGACTT-TTCCCTTAGTTATCACCTACCAGTCCCTTTGGGGATT  
-GCC--GATTGCAGACAGCCACCT-A---CCCAC---tcctatggtttggatatttgaccccactgaatctcatggtg  
aaatctgatccccattggtggaggtggggcct-ggtgggaggtgctggagtcac-----gtc  
ttggtgccgtcttcc---tcgtgatgagttgagttcttactctatttggttcctgtgatagctgggtgttaaaaagag  
cctggcaccttcc---cctcc-tgccttgcttctctc--accatgtgat--ctgcacatgtcagcttcttcccc  
ttcctccaagtgtggaagcagcttgagggcctccttagatgcacatgctggcaccatgcttcttgtagcagcctgcaga  
accatgagccaaataaacctttttcttta-----taaattaccagcctcaggtaatcctttatagcagtacaa-ac  
tgactaagatg---CCCAT---GGTCAGCACATCCTTCCAGGGCGACAGACATCCAGTGACT-AATTAATG--TGATA  
GTATACAGGTCTGGCTAT
```

>Marmoset

```
GACACCAT-GATGCTCAGATCCCCCTTCAATGAAGGACTT-TTCCCACAGCCATCATCTACCAGTCCCTTTGGGGATT  
-GCC--AGTTGCAGAGAGCCACCT-A---CCCAC---tcctatggtttgtatatttgaccccaccaaactctcatggtg  
aaatctggtccccagtggtgggggtgagggcctaggtaggaggtggttgggtcatccaggtgcatccctgatgaatgct  
ttggtgcagtcctcc---tggttatgagt-gagttcttgcttcttcttggctcctgtggttagctgggt----acaaagag
```









```
-----  
-----  
-----  
-----  
-----  
-----  
-----GAAAC--AAAGGCAAGAGTCTGAGCAAGAGCCTGGAAAGTGT  
>Dog  
AAAGTCCTCCTGCAGAGACCTGTGACCCAGTGAATGCCACAAA--TG--GT-----  
--CAATTGAGCCAGAAG-GTTCCGA--C----CCAACTCTGGGAGGAC---CCAGGGATATGGGAAAGATGCCTTAT-  
GGGGATTAAAGTCAAGCTCTTCCTTACAAGGTA-----  
-----  
-----  
-----  
-----  
-----  
-----  
-----  
-----TGAGT--AGGGCCCAAAGTCTGAACTAGAACTTGGGATA---
```

## Marker M130

>MSTB1

```
-----  
-----tgctatagtttg-atg  
tttg-----tcccctccaaacctcatggtgaaatttgatccccagtggtggagggtggggcctaattgggagggtgtt  
gggtcatggggcgggatccctcatgaatagattaatgccctccctcgggggtggggatgagtgagttctcactctatta  
gttcccgcgagagctgggtgtaaaaagagcctggcaccctccctcctctctctcttgcttccctctctcgccatgtgat  
ctctgcacacgccggctcccctccacctccgcctggaagcagcctgaggccctcaccagaagcagatgctgg  
cgccatgcttctgtacagcctgcagaaccgttgagccaaataaacctctttctttataaattaccagcctcaggta  
ttcctttatagcaacacaaaatggactaagaca-----  
-----
```

>Human

```
AATTCT-GCAGTGAAAAATAAC---CACTAATGGCAAAGGAGAAGAAAGACTTCCAAGACAAAGTTAAGCTATTTGAG  
GATAGACTC---AGGGATGTAGTTCAGATAAAAAGCGCCATTTAAAAGATT---GATGG---tgctattgtttg-ata  
tggtttgcttgggtcccccagctctcttggtaaatctgatgccagtggtggagggtggggctggtgggagggtgtt  
gggtcatgggga-ggactcctcaagagtagtttgggtatcattctcatgacaacgactgaat-----tcttgctctta  
gttcccgcacgaactgattggtgaaaagagcctggcacctcctcctttc-----tctcttgccctttctctctc  
accatgtgatgcctgctttccttcatcttacgtcatgagtggaatcttccctgaggctcctgatcagaagcagatattga  
caccatacttcttgtatagcctgcagaacctgggcccataaacctcttttctttataaatcactcagcctcaggta  
ttcctttatagcaacac-aaatggactaagact---GATGG---AATTCCAAGTGTGAGGAGAATGC-GTTATCTAA  
AGACTGCAGGT----TTA-----AGTAAGCCACTACAGATGTTAAAAATTACACCAGAGTAAAGTATTTGGTATAGC
```

>Chimp

```
AATTCT-GCAGTGAAAAATAAC---CACTAATGGCAAAGGAGAAGAAAGACTTCCAAGACAAAGTTAAGCTATTTGAG  
GATAGACTC---AGGGATGTAGTTCAGATAAAAAGTGCCATTTAAAAGATT---GATGG---tgctattgtttg-ata  
tggtttgcttgggtcccccagctctcttggtaaatctgatgccagtggtggagggtggggctggtgggagggtgtt  
gggtcatgggga-ggactcctcaagagtggttgggtgtcattctcatgacaacgactgaat-----tcttgctctta  
gttcccacacgaactgattggtgaaaagagcctggcacctcctcctttc-----tctcttgccctttctctctc  
accatgtgatgcctgctttccttcatcttacgtcatgagtggaatcttccctgaggctcctgatcagaagcagatactga  
caccatacttcttgtatagcctgcagaacctgggcccataaacctcttttctttataaatcactcagcctcaggta  
ttcctttatagcaacac-aaatggactaagact---GATGG---AATTCCAAGTGTGAGGAGAATAC-GTTATCTAA  
AGACTGCAGGT----TTA-----AGTAAGCCACTACAGATGTTAAAAATTACACCAGAGTAAAGTATTTGGTACAGC
```

>Orangutan

```
AATTCT-GCAGTGAAAAATAAC---CACTAATGGCAAAGGAGAAGAAAGACTTTGAAGACAAAGTTAAGCTATTTGAG  
GATAGACTC---AGGGACGTAGTTCAGATAAAAAGTGCCATTTAAAAGACT---GATGG---tgctattgtttg-ata  
tggtttgcttgggtcccccagctctcttggtaaatctgatgccagtggtggagggtggggcctggtgggagggtgtt  
gggtcatgggga-ggaccctcaagagtggttgggtgtcattctcatgacaacgactgaat-----tcttgctctta  
gttccctgcacgaactgattggtgaaaagagcctggcacctcctcctttc-----t---tgccctttctctc--  
accatgtgatgcctgctttccttcatcttacgtcatgagtggaatcttccctgaggctcctgaccagaagcagatactga  
caccatacttcttgtatagcctgcagaacctgggcccataaacctcttttctttataaatcactcagcctcagcta  
ttcctttatagcaacac-aaatggactaagact---GATGG---AATTTCCAAGTGTGAGGAGAATACAGTTATCTAA  
AGACTGCAGGT----TTA-----AGTAAGCCACTACAGATGTTAAAAATTACACCAGAGTAAATATTTGGTACAGC
```

>Baboon

```
AATTCT-GCAGTGAAAAATAAC---CACCAATGGCAAAGGAGAAGAAAGACTTCCAAGACAAAGTTAAGCTATTTGAG  
GATAGACTC---AGGGATGTAGTTCAGATAAAAAGTGCCATTTAAAAGATT---GATGG---tgctattgctctgggata  
tgatttgtttgggtcccccagctctcttggtaaatctgatgccagtggtggagggtggggcctggtgtgagggtgtt  
gggtcatgggga-ggacccttaagagtggttgggtgtcattctcatgacaaggactcaat-----tcttgctctta  
gttcacactcgaactgattggtgaaaagagcctggcacctcctcctttc-----tctcttgccctttctctc--  
accatgtgatgtctgctttccttcttcttcatgtcatgagtggaatcttccctgaggctcctgaccagaagcagatactga  
caccatacttcttgcatagcctgcagaacctgggcccataaacctcttttctttatacatcactcagcctcaggta  
ttcctttatagcaacac-aaatggactaagact---GATGG---AATTTCCAAGTGTGAGGAGAATACAGTTATCTAA  
AGACTGCAGGT----TTA-----AGTAAGCCACTACAGATGTTAAAAATTACACCAGAGTAAATATTTGGTACAGC
```

>Rhesus

```
ACTTCT-GCAGTGAAAAATAAC---CACCAATGGCAAAGGAGAAGAAAGACTTCCAAGACAAAGTTAAGCTATTTGAG  
GATAGACTC---AGGGATGTAGTTCAGATAAAAAGTGCCATTTAAAAGATT---GATGG---tgctattgctctgggata  
tgatttgtttgggtcccccagctctcttggtaaatctgatgccagtggtggagggtggggcctggtgtgagggtgtt  
gggtcatgggga-ggaccctcaagagtggttgggtgtcattctcatgacaaggactcaat-----tcttgctctta  
gttcacactcgaactgattggtgaaaagagcctggcacctcctcctttc-----tctcttgccctttctctc--
```

accatgtgatgcctgctttccttcgtcttacgtcatgagtggaatcttcctgaggtcctgaccagaagcagatactga  
caccatacttcttgcatagcctgcagaacctgggccaataaacctttttctttatacatcactcagcctcaggta  
ttcctttatagcaacac-aaatggactaagact---GATGG---AATTTCCAAGTGTGAGGAGAATACAGTTATCTAA  
AGACTGCAGGT----TTA-----AGTAAGCCACTACAGATGTTAAAAATTACACCTGAGTAAAATATTTGGTACAGC  
>Marmoset  
AATTCT-GCAGTGAAAAATAAC---CACTAATGCCAAAGGAGAATAAAGACTCTGAAGACAAAGTTAAGGTATTTGAG  
GATAGACTC---AGGGATGTAGTTCAGATAAAAGTGCTATTTAAAGACT---GACGG---tgctattgtttg-ata  
tgatttgtttgcttccaccaagtctcttcttgaaatctaatagcccaatggttgatggggcctgggagggtggtt  
gggtcatgggga-ggatccctcatgagtggttgggtgctattctcatgacaaggactgaat-----tcttgctctca  
gtccccactagatctgagtgctgaaaagagcctggtagctcctcctcctc---cctcctccttgcttttctcctc  
accatgtgatgcctgctttcctttgcttacctcatgagtagactcctgaggtcctgaccagaagcagatgctga  
caccaggcttcttgtagcctgcagaacctgggccaataaacctcttttctttataaatcacttaacttcaggta  
ttccttttagcaacag-aaatggcctaagact---GATGG---AATTTCTAAGTGTGAGGAGAATACAGTTATCTCA  
AGACTACAGGT----TTA-----AGTAAGCCATTACAGATGTTAAAAATTATACCAGAGTAAAATATTTGGTACAGC  
>Tarsier  
AATTCT-GTGGTGAAAAATAAC---CATTAATGCCAAAGAAGAAGAAAGACCTGGAAGAGAAAGCTAAGCTGTTTGGAG  
GATAGACAC---AGGAATGCAGCTCAGATGAAAATGCAATTTAAAGGATT-----  
-----aataaggtctggggagggtattt  
tggtcatgggggagaccctcattaaaggcttgatgccattcacacaggagtaagtgaat-----tctcactctta  
gttctgcaagaactgg-----taccgctttccctcctc-----tc-----  
accatgtgatgcctgctccccttcaccttctgcatgagtagaagctcctgaggtctcatcagaaacagatgctgg  
cgccacacttcttgtagcctatggaactgtgagccaacaataatcttttctttataaattacctagcctcaggta  
ttcctttatagcaacac-aaacagaccaagaca---GATGA---AATTTCCAAGTGTGAGGAGAATACAGTTATTTAA  
AGACTACAGAT----TTACTTCAAGTTCGCCACTGAAGATGCTAAAAATAAAACCATTGTAAAGTATTTGGTATAAC  
>Bushbaby  
AATTCTTGCAGTGAAAAATACC---CACTAATGACAAAGGAGAAGAAAACCCAGAAAGATAAAGTTCAGCTATCTGAG  
GCTAGACAT---GGAGAATTAGTTCAGATGAAA-TGCAATTTAAAGGATT-----  
-----  
-----  
-----  
-----  
-----GATGG---AATTTCCAAGTATGAAGAGAACACAGTTATCTAA  
AGACTGCAGGTGTAGTCAC---TTTAAGTCACTGTAGATGTTAAAAATAGGACCATAGTAAAATATTTGGCACAAC  
>Mouse\_lemur  
AATTCT-GCAGTGAAAAATAAT---CACTAATGCCAAAGGAGAAGAAAGACTGAAAGCCAAAGTTCAGCTATCTGAG  
GATAGACAC---AGGGATGTAGTTCAGATGAAAATGCAATTTAAAGGATT-----  
-----  
-----  
-----  
-----GATGG---AATTTCTAAGTGTGA---GAATACGGTACTTAA  
AGAAAGCAGGT----TTAT----TGTAAGCCACTGTAGAGGTTAAAA-TAAGACCATAGTCAAATATTTGGCACAAT  
>Tree\_shrew  
AATACT-GAAGTGGAATAACGAACACCAATGCCAAAAAGAAAG---GACCCAGAAGACAAAGCTAAGCTATTTGAA  
GATAGACAC---AATGATGCAGTTCAGATGAAAATGCAATTTCAAAGGATT-----  
-----  
-----  
-----  
-----GAAGG---AATATATAAATGTGGAATAAATAAGATCATAGTGAAGTATTTGGCACAAC  
AGAGTACGGGT----TTAT----TTTAAGTCACTGTCAATTTAAAAATAAGATCATAGTGAAGTATTTGGCACAAC  
>Dog  
AATTCT-GCAGTGAGTAATA---ACATTGATGCCAGGAGAAAAAACAATAGACAAGAGTAAGCTAAGCTATA-GAA  
CAAAGCTACTTGAAGGATGCAGTTCAGATGAAAATACAATGTAAAGGATT-----  
-----



```
-----  
-----  
-----  
-----  
-----GATGG---AATTTCTAATTCAGAGGAGAAGAAAGTTATCCAA  
AGATAGCAGGT---TTACTTTGAATAAGCCATAGTAAAATTAATAAATAAGACCACAGTAAAATATTTTACATGAC  
>Horse  
AATTCT-GTAGTGAATAATAACAAACACTAATGCCAAAAGAGAAGAAAGACCTGGAAGACAAAGCTAAGATATTTAAA  
GACAGACAT---AGGGATACAGTTCAGATCAATGTGCAATTTAAAGGATT-----  
-----  
-----  
-----  
-----  
-----GATGG---AATTTCTAAGTGTGAGGAGAATAAAGTTATCTAA  
AGATAGAAGGT---TTACTTTAATAAGCCACCAAAGATTTAATAAATAAGACTATAGTAAAATATTTTGCATGAC
```

## Marker M131

>MSTB1

```
-----  
--tgctatagtttggatggttgcctcccaaacctcatggtgaaatttgatcccagtggtggaggtggggccta  
gggaggtggttgggtcat-gggggcggatccctcatgaatagattaatg-----ccctccctcggggg  
t--gag-tgagttctcactctattagttcccgcgagagctgggtgttaaaaagagcctggcactccctcctc  
cttgcttctcctcgccatgtgatctctgcacacgcggctccccttcaccttccgcca-tgagtggaagcagc  
aggccctcaccagaagcagatgctggcgccatgcttctgtacagcctgcagaaccgtgagccaaataaacct  
ctttataaattaccagcctcaggtattcctttatagcaacacaaaatg-----gactaagaca-----  
-----
```

>Human

```
AAG----AGG-TTTCCTTGAGGAAGAGGCACAGGAAAGATGA-AAATTTACATTCTGCTGCTCTGATA---CTCAC-  
--tgctctgggttggatgcttttccccaaa-acctcatggtgaaatttgatcacaatggtggaggtgaggccta  
ggaaatgttttaggtcac-agggtgcagatccatcatgaatacactaatgcagggagaagggctgact-ggggcg  
tgtgag-tgagctctcactctattagttcctgtgagatctgggtgttaaaaagagcctggcatctc----cct  
t-----gttgccatttgatctctacacactca-gtcccccttgccttccacca-tgagtggaagcatcctg  
aggccctcaccagatgc-----ccaatggtgaacctccagcaagctgaatcatgagctaaataaacctcttt  
ctttataaattatccagcatcagatattcctttatagcaatagtaaag-----gactaagaca---CTGAA-  
-----ACAATAGCAAAACACATACTTTTAGCCCCACAGTGCCTCT-AAAAAGGTCTTCCCATATGTTACT
```

>Chimp

```
AAG----AGGCTTTCCTTGAAGAAGAGGCACAGGAAAGATGA-AAATTTACATTCTGCTGCTCTGATA---CTCAC-  
--tgatctgggttggatgcttttccccaaa-acctcatggtgaaatttgatcataatggtggaggtgaggccta  
ggaaatgttttaggtcac-agggtgcagatccatcatgaatacactaatgcagggagaagggctgact-ggggcg  
tgtgag-tgagctctcactctattagttcctgtgagatctcggtgttaaaaagagcctggcatctc----cct  
t-----gttgccatttgatctctacacactca-gcaccctatgccttccacca-tgagtggaagcatcctg  
aggccctcaccagatgc-----ccaatggtgaacctccagcaagctgaatcatgagctaaataaacctcttt  
ctttataaattatccagcatcagatattcctttatagcaatagtaaag-----gactaagaca---CTGAA-  
-----ACAATAGCAAAACACATACTTTTAGCCCCACAGTGCCTCT-AAAAAGGTCTTCCCATATGTTACT
```

>Orangutan

```
AAG----AGGCTTTCCTTGAAGAAAAGGCACAGGGAAGATGA-AAATTTATATTCTGCTGCTCTGATA---CTCAC-  
--tgctctgggttggatggttttccccaaa-acctcatggtgaaatttgatcacaatggtggaggtgaggccta  
ggaaatgttttaggtcac-agggtgcagatccatcatgaatacactaatgcagggagaagggctgactaggggcg  
tgtgag-tgagttctcactctattagttcctgtgagatctgggtgttaaaaagggcctggcatctc----cct  
t-----gttgccatttggtctctacacactca-gtcccccttgccttccacca-tgagtggaagcatcctg  
aggccctcaccagatgc-----ccaatggtgaacctccagcaagctgaatcatgagctaaataaacctcttt  
ctttataaattatccagcatcagatattcctttatagcaatagtaaag-----gactaagaca---CTGAA-  
-----ACAATAGCAAAACACACATTTTTAGCCCCACAGTGCCTCT-AAAAAGGTCTTCCCATATGTTACT
```

>Baboon

```
AAG----ACACTTTCCTTGAAG---AGGCATGGGGAAGATGA-AAATTTACATTCTGATGCTCTGATA---CTCAC-  
--tgctctgggttggatggttttccccaaa-acctcatggtgaaatttgatcacaatggtggaggtgaggccta  
ggaaatgttttaggtcac-gggcgagatccatcatgaaaacactaatgcagggagaaagggctgactggggcgacg  
tgtgag-tgagttctcactctattagttcccgtagaggtgggtgttaaaaagaacctgatatctc----cct  
t-----gttgccatttgatctctacacactca-gtcccccttggccttccacca-taagtggaagcatcctg  
aggccctcaccagatgc-----ccagtgctgaaccttccagcgagctcaatcatgagctaaataaacctctt  
ctttataaattatccagcatcagatattcctttatagcaatagtaaag-----aactaagaca---CTGAA-  
-----ACAATAGCAAAACACGTACTTTTAGCCTCACAGTGCCTCTAAAAAAGGTCTTCCCATATGTTACT
```

>Rhesus

```
AAG----ACACTTTCCTTGAAGAAGAGGCATGGGGAAGATGA-AAATTTACATTCTGATGCTCTGATA---CTCAC-  
--tgctctgggttggatggttttccccaaa-cactcatggtgaaatttgatcacaatggtggaggtgaggccta  
ggaaatgttttaggtcac-ggggtgcagatccatcatgaaaacactaatgcagggaaaaagggctgactggggcgacg  
tgtgag-tgagttctcactctattagttcccgtagaggttgattgttaaaaagaacctggatctc----cct  
t-----attgccatttgatctctacacactca-gtcccccttggccttccacca-tgagtggaagcatcctg  
aggccctcaccagatgc-----ccagtgctgaaccttccagcgagctgaatcataagctaaataaacctc--ct  
ctttataaattatccagcatcagatattcctttatagcaatagtaaag-----aactaagaca---CTGAA-  
-----ACAATAGCAAAACACGTACTTTTAGCCTCACAGTGCCTCTAAAAAAGGTCTTCCCATATGTTACT
```



>Horse

AGTCAGAAGGCTTTTCAGCAAAGAAGAGGTGTAGGGAGGCTGAAAATGTTCCACCCCTGCTGTTCCGGTG-----  
-----  
-----  
-----  
-----  
-----  
-----CAGCA---AA  
CACACACGACAGCAAACCTGGTATTTTTATCCCCACAATGTCTCTAAAAAGATCTGG-CTT-ATGTTCTC

## Marker M132

>MSTB1

```
-----tgctatagtttggga-----tgtttgtcccctccaaacctc
-----
atggttgaatctgatcccc-agtgttggga---ggtggggcctaataatgggaggtggttggggtcatgggggaggatccctc
atgaatagattaa---tgccctccctcgggggtggggatgagtgagttctcactctattagttcccgcgagagctgggt
gttaaaaagagcctggcacctccctcctctctct---ctcttgcttccctctctcgcctatgtgatctctgcacacgccgg
ctccccttcaccttccgccatgagtggaagcagcctgagggcctcaccagaagcagatgctggcgccatgcttcttgt
acagcctgcagaaccgtgagccaaataaacctcttttctttataaattaccagcctcaggtattcctttatagcaac
acaaaatggactaagaca-----
```

>Human

```
CTTACATCCTTTTGTGACGGGTGCTGATAGAATTGGTTTAGCTCTTTTCATCACCG-TTTAAAGAATATCAAG
GAAAGAATCTACATAACCCAGCTTG---GGTCT---tgctatgggttcagacatagtttgggttggcccaacaagtctt
atggttgaatctgatccccagtggttggga-g-g-gggacctgggtgggaggtggttgggttatgagaagggatctttc
atgaatgggttgggtggttgcctcc-----taggagtgagtgagttctcactc----aattcccacaggaactgggtt
attggaagagcctg--acctcctcctgtctc---ctccttccctctctcatcgctctgacat-----ca
cttcccttccctttctgccataagtgggaagcagtccttaggccttcatcagaaacagatgctgggtgccatgcttcttgt
atagctctgcagaactgtgagccaagtaaatctcttttctttattaactcaacattaggcattcctttatggcaac
acaa-atggactaaaaca-----GGTTC---TGTGTCCATTC-----TTTAGGTCAAACACAC
TGGGGAGGGGGT-GGTATGAGGTTCTGAGATTACCCAATGTGGGTTATGT--TTT
```

>Chimp

```
CTTACATCCTTTTGTGACGGGTGCTGATAGAATTGGTTTAGCTCTTTTCATCACCG-TTTAAAGAATATCAAG
GAAAGAATCTACATAACCCAGCTTG---GGTCT---tgatatgggttcagacatagtttgggttggcccaacaagtctt
atggttgaatctgatccccagtggttggga-g-g-gggacctgggtgggaggtggttgggttatgagaagggatctttc
atgaatgggttgggtggttgcctcc-----taggagtgagtgagttctcactc----aattcccacaagaactgggtt
attggaagagcctg--acctcctcctgtctc---ctccttccctctctcatcgctctgacat-----ca
cttcccttccctttctgccataagtgggaagcagtccttaggccttcatcagaaacagatgctgggtgccatgcttcttgt
atagctctgcagaactgtgagccaagtaaatctcttttctttattaactcaacattaggcattcctttatggcaac
acaa-atggactaaaaca-----GGTTC---TGTGTCCATTC-----TTTAGGTCAAACACAC
TGGGGAGGGGGT-GGTATGAGGTTCTGAGATTACCCGATGTGGGTTATGT--TTT
```

>Orangutan

```
CTTACATCCTTTTGTGACGGATGCTGATAGAATTGGTTTAGCTCTTTTCAGCACCG-TTTAAAGAATATCAAG
GAAAGAATCTACATAACCCAGCTTC---GGTCT---tgctatgggtttaaacaatagtttgggttggcccaacaagtctt
atggttgaatctgatccccagtggttggagg--g-gggacctgggtgggaggtggttgggttatgagaagggatccttc
gtgaatgggttgggtggttgcctcc-----taggagtgagtgagttctcactc----aattccttgcaagaactgggtt
attggaagagcctg--acctcctcctgtctc---ctccttccctctctcatcactctgacat-----ca
cttcccttccctttctgccataagtgggaagcagtcctcaggccttcatcagaaacagatgctgggtgccatgcttcttgt
atagctctgtagaactgtgagcaaagtaaatctcttttctttattaactcaacattagacattcctttatagcaac
acaa-atggactaaaaca-----GGTTC---TGTGTCCATTC-----TTTAGGTCAAACACAC
TGGGGAGGGGGT-GGTATGAGGTTCTGAGATTACCCAATGTGGGTTATGT--TTT
```

>Baboon

```
CTTACATCCTTTTGTGACGGGTGCTGATAGGATTGGTTTAGCTCTTTTCAACACCA-TTTAAAGAATATCAAG
GAAATAATCTACTTAACCCAGCTTG---GGTCT---tggtatgggtttagacatagtttgggttggcccaacaagtctt
atggttgaatctgatccccagcattgga-gtcg-gggaccaggagggtggttgggttgtgagaagggatccctc
atgaatgggttgggtggttgcctcc-----taggagtgagtgagttctcactc----aattcccgaagaactgggtt
attgaaaagagcctg--acctcctccctctctcttctccttccctctctcatcactctgacat-----ca
tttcccttccctttctgccgtaagtgggaagcagtccttaggccttcatcaaaaacagatgctgggtgccatgcttcttgt
atagctctgcagaactgtgagccaagtaaatctcttttctttattaactcaacattaggcattcctttatagcaac
acaa-atggactaaaacg-----GGTTC---TGTGTCCATTC-----TTTAGGTCAAACACAC
TGAGGAGGGGGT-GGTATGAGGTTCTGAGATTACCCAATATGGGTTATGTTCTTT
```

>Rhesus

```
CTTACATCCTTTTGTGACGGGTGCTGATAGGATTGGTTTAGCTCTTTTCAACACCA-TTTAAAGAATATCAAG
GAAATAATCTACTTAACCCAGCTTG---GGTCT---tggtatgggtttagacatagtttgggttggcccaacaagtctt
atggttgaatctgatccccagcattgga-gtcg-gggaccaggagggtggttgggttgtgagaagggatccctc
atgaatgagtttgggtggttgcctcc-----taggagtgagtgagttgtcactc----aattcccgaagaactgggtt
```

attgaaaagagcctg--acctcctcccctctctctctctctctctctctcatcactctgacat-----ca  
cttcccttccctttctgccataagtggaagcagctcttaggccttcatcaaaaacagatgctgggGCCatgcttctgt  
atagtctgcagaactgtgagccaagtaaactctctttctttattaataactcaacattaggcattcctttatagcaac  
aaa-atggactaaaacg-----GGTCC---TGTGTCCATTC-----TTTAGGTCAAACACAC  
TGAGGAGGGGGT-GGTATGAGGTTCTGAGATTACCCAATATGGGTTATGTTCTTT

>Tarsier

CTTACATTCTTTTAGTG-TGTGGTTGGTGCCGAGAGGGTTGATTTAACTTTCACAGCACCA-GTTAAGGAATACCAAG  
GAAGGAAACTACATGGTTCAGCTTG---ATTCC---cgggtgtggtttgatgatggtttgtctgaccctgccaagtctc  
atggtgaaatctgatt-tccatttttggg-g--gtggggcctagtgggaagtgtttggggtttgagggcagattcctc  
acaattgactttttgcccattctct-----tgagagtggag----ttcacactc--ttagttcccatgagaattgggt  
gttgaagagagcctg--acacttctcactctt---tctttctcttacttctcttcttaggacatttattgtctgcttcc  
cttcaccttctgccttgagct-----gaagttccctgaggccttcatcga----agatactgggGCCatggttcttat  
acagcctgcagaaccctaagacaaataattatcttttctttataaattaccaagtctcaggtatttctttatagaaac  
aaa-atggactaagacaATGTCCAAATGGACTAA---GGTAC---CGTGTCCATTC-----TTTAGATCAAACATTC  
TAGGTAGGTGGA-G-----GAGGTTTCCCAATGTGAGTTACATTTGTA

>Bushbaby

CTTAGATTCTTTAATGTTGTGACTGGTGCTGACAGGGTTGGTTTATCTTTCATGGTACCA-GTTAAAAAACATCAGG  
GAAGGAATCTACGTGGCCTAGCTT-----

-----GGTCC---TCTGCCATCCTTTCTTTTAGATCAAACACAC  
TAGGCA--GAGT-GGTATGAAGATCTGAGTTTGTGAATGTGGGTTATGTTCTTA

>Mouse\_lemur

CTTACATTCTGTTAGTGTTGTGACTGGTGCTGATAAGGTTGGTTTATCTTTCATGGCACCA-GTTAAAAAATATCAGG  
CAAGTGATCTCCATGGCCAGCTTG-----

-----GGTCC---TCTGTCCATCC-----TTTAGATCAAACACAC  
TGGGCAGGGGGT-GGTATGAGGTTCTGAGATTGCCAAATGTGGATCATATTCTTA

>Tree\_shrew

-TTGC-----TTAGTGCTGTGGCTGGTACTGA-AGGGTTGTTTTATCTTTCACGTTAGC-----AAAGAATATGAGG  
GAAGAACTTGATATGGTCCAGCTT-----

-----GGTAT---CCATTC-----TTTAGATCAAACATGC  
TGGACAGGGAGT-TGTATGAAGTTCTGAGATTACCTAACATGGGTCACGTTCTTA

>Dog

TTTACAGTCTGTTACTGCTGTGACCAGTGTGAAAGGATTGCTTTCTTTTTTACAGCCCCAGTTTGAAGACTATCTGG  
GAAGGAATCTACGT-TCCCAGCTTAG-----

-----AGTGT---TC-----TTTAGATCAGACACAC  
TGGGGAGAGGGA-GTTGTGAGTTTCTGAGATTGCTCA-----ATGTTCT--















>Dog

TAAATATGGGCCTGTTGGGTGACATGGTACAGCTATGGATACTAACCTGGGAGAAAAGTGTCCCTCTAGGAGATTGGA  
TGGGT CAGAAAATGGTCCTCA-----

-----GTTGG---AGACAGAGATCCTGTTAGACTGCCCTCTTATTTTCCAGCTCCATAGTTCTTTCCCAACCTATG  
ACAGTTCTAAACCAGAAGTGGAAACAGTTTTGAGAGGCAATCCAGAACCCTAAAAGGAAAA--TTC-----TTTTCC  
ACTT

>Horse

TGAGTATGGGCCTGTTGAGCTAAAGGGTGCAGCTATGGATGCTAACCTGGGAGAAACAAGGTTGCTCTAGGAGATTGGG  
TAGGGCAGAAAGTGGTCCTCA-----

-----GTTGG---AGATAGAGACCCCGTTAGACTGCCCTCTCATTCTCCAACCTCCATAGTCCTTTCTCATCCTATG  
ACAGCCCTAAAACAGAAATGGAAACAGCTCTGAGAGACAATTCTAGAACCCTAAAAGGGAAGCTTCAGCGATTTTCC  
AGTT

Marker M137

>MSTB1

-----  
-----t  
gctatagtttggatgtttgtccctccaaacctcatggtgaaatttgatccccagtggtggaggtggggcctaattggg  
aggtgtttgggtcatggggcgatccctcatgaat-----agattaatgccctccctcgggggtggggatgagtgagt  
tctcactctattagttcccgcgagagctggttgtt-aaaaagagcctggcacctccctcctctctctcttgcctcctc  
tctcgccatgtgatctctgcacacgccggt-ccccttcacctccgccatgagtggaagcagcctgagggcctcacc  
agaagcagatgctggcgccatgcttctgtacagcctgcagaaccgtgagccaaataaacctcttttctttataaatt  
accagcctcaggtattcctttatagcaacacaaaatggactaagaca-----  
-----

>Human

ACAGAGTCCATCACTTGCCCTCTCTGAGTCTTAAACATCTTCCTGGAATGACCTAGAAACAAGAGGACTTTATGTTTT  
GAGATGATACTACCCACATGCTAGATACTTCTCCCATGATTTTTGTAAAGAAA-AATCTGCCAATA---CCCCT---t  
ggtatagtttggatatttgtccctccaaatctcatg-----ttgatccccaatggtggaggtggagcctggttgg  
aaggtgtaggtcatggggatggattcctcatgaac-----atcttcatggttgcctct---ggataatgagtgact  
tcttgcctgttagttcctgtgagatctaattggt-aaaaagagtctggcacctctgtcctctctctctcttgcctctc  
tctttccatgtgacat-----gctggct-ccccttctcttctgccatgattggaagcttctggtggccctcatc  
agatgtaaatgcttacaccatgcttctgtacagtttgagaaccatgagccaaataaaccttttctt-tttagaaatt  
accagcccagggcattcctatatagcaacacaa-atggactaaaaca---CACCT---GGAAAAGATATTTGCAAA  
TGAGAATGA-TTAAAAGCCATTTGGACAG---AAAAAAGATGGAAGAAAGAGGAACACA----AATGTCCTCTATAA  
GGTTGCTACTACGGGTGACAAATACATTTGAGGATGCCTAGCTCAATGCACTGCCTCC

>Chimp

ACAGAGTCCATCACTTGCCCTCTCCGAGTCTTAAACATCTTCCTGGAATGACCTAGAAACAAGAGGACTTTATGTTTT  
GAGATGATACTGCCCATATGCTAGATACTTCTCCCATGATTTTTGTAAAGAAA-AATCTGCCAATA---CCCCT---t  
agtatagtttggatatttgtccctccaaatctcatg-----ttgatccccaatggtggaggtggagcctggttgg  
gaggtgtaggtcatggggatggattcctcatgaac-----atcttcatggttgcctct---ggataatgagtgact  
tcttgcctgttagttcctgtgagatctaattggt-aaaaagagtctggcacctctgtcctctctctctcttgcctcctc  
tctttccacgtgacat-----gctggct-ccccttctcttctgccatgattggaagtttctggtggccctcatc  
agatgtaaatgcttacaccatgcttctgtacagtttgagaaccatgagccaaataaaccttttctt-tttagaaatt  
accagcccagggcattcctatatagcaacacaa-atggactaaaaca---CACCT---GGAAAAGATATTTGCAAA  
TGAGAATGA-TTAAAAGCCATTTGGACAG---AAAAAAGATGGAAGAAAGAGGAACACA----AGTGTCTCTATAA  
GGTTGCTACTACGGGTGACAAATGCATTTGAGGATGCCTAGCTCAATGCACTGCCTCC

>Orangutan

ACAGAGTCCATCACTTGCCCTCTCTGAGTCTTAAACATCTTCCTGGAATGACCTAGAAACAAGAGGACTTTATGTTTT  
GAGATGATACTACCCATATGCTAGATACTTCTCCCATGATTTTTGTAAAGAAA-AGTCTGCCAGTA---CCCCT---t  
ggtatagtttggatatttgtccctccaaatctcatggtgaaatttgatccccaatggtggaggtggagcctggttgg  
gaggtgtaggtcatggggatggattcctcatgaac-----atcttcatggttgcctct---ggataatgagtgact  
tcttgcctctattagttcctgtgagatctaattggt-aaaaaggtctggcacctctgtcctctctctctcttgcctcctc  
tctttccatgtgacat-----ggtggct-ccccttctcttctgcccagattggaagcttctggtggccctcatc  
agatgtaaatgcttataccatgcttctgtacagtttgagaaccatcagccaaataaa-----ctt-tttagaaatt  
accagcccagggcattcctatatagcaacacaa-atggactaaaaca---CACCT---GGAAAAGATATTTGCAAA  
TGAGAATGA-TTAAAAGCCATTTAGACAG---AAAAAAGACGGAAGAAAGAGGAACACA----AGTGTCTCTATAA  
GGTTGCTACTACGGGTGACAAATGCATTTGAGGATGCCTAGCTCAATGCACTGCCTCC

>Baboon

ACAGAGTCCATCACTTGCCCTCTCTGAGTCTTAAACATCTTCCTGGAATGACCTAGAAACAAGGGGACTTTATGTTTT  
GAGATGATACTATCCATATGCTAGATACTTCTCCCATGATTTTTATATGGAAA-AATCTGCCAATA---CCCCT---t  
ggtgtagtttggatatttgtctctccaaatctcatggtgaaatttgatccgcaatggtggaggtggaacctggttgg  
gaggtgtaggtcatggggatggtttcctcatgaacaagttatcttcatggttgcctct---ggataatgagtgact  
tcttgcctctattagttcctgtgagatctaattggttaaaaaagagtctggcacctctgtcctctctctctcttgcctcctc  
tcttggcatgtgacat-----gctggct-ccccttctcttctgcccagattggaagcttctggtggccctcctc  
agatgtaaatgcttataccatgcttctgtacagtttgagaccgatgagccaaacaaacttttctt-tttagaaatt  
accagcctgagggcattcctatacagcaacacaa-atggaccaaaaca---CATCT---GGAAAAGATATTTGCGAA  
TGAGAATGA-TTAAAAGCCATTTGGACAG---AAAAAAGATGGAAGAAAGAGGAACACA----AGTGTCTCTATAA  
AGTTGCTACTACGGGTGACAAATGCATTTGAGGATGCCTAGCTCAATGACTGCCTCC



>Tree\_shrew

TTAG--TCTATCACTCTCCCTCTCTGGGTATTAATCATCTTCCTGGAATACCCTAG-AGCAAAGGGACTCCATGTTTT  
TAGATGATAGAACTGATATGCTAGAGACTTCTCCAGGATT-----AAAAC-AATTTACCAGTA-----

-----CATCT----AGAAAAGATATTTGCACA  
TGAGAATGAACTAAAGGCCATTTGGGCAG---AAAACTCGATGGCAGAAAGAGAAACACA-----GCGTCCCCTATTC  
AGCTG-----TGACAAATTAATTTGTGGATAGCTGGCCCAGTGGGCTGCCTCC

>Dog

TGAGACTCAATCATATTCCTTCTCTGTGTCTCAATTATGTTTCTAGAATGACCTAG-ATGAGG-GAACTTCATATTTT  
AAGATGATGCTACCCA----TAGATACTTCTCTCAGGATTTTGA----AAAATAATCTGCCAATA-----

-----CCT-----AAATGGTATTTGCACA  
TGAGAACAA-TTAAAAGCCATCTGGGCAGAAAAAAAAAGGATGGAAGGAAGAGAAACACA---AAATATCCTTTATGC  
AG-----CTATGACAAATACACTTGAGGCCTCCTAGCCCAGTGCTCTGCCTCC

>Horse

GAAGAGTCAATCATTTTCTTCTCTGTGTC---TTATCTTCC-AAAATTACCTAA-AAGGAG-GGACTTCATGGTTT  
GAGGTGATGCTACCCATATGCTAGATACTTCTTTTATGATTTTGA----AAAA-AATCTGCCATTTA-----

-----CATAC--TCATAAATGATATTTGCATA  
TGAGAATGA-TTAAAAGCCACAGAAGCAG---AAAAAAGGGTGAAGGAAGAGGAATACAAACAAATGTCCTCTCTAC  
AACTGCCACTGTCTATGACAAATACACTTGAGGCCACCTAGCCCAGAGCACTGCCTCC



Marker M138

>MSTB2

-----  
-----tgctatgggttgggatatgggttgggttgc--cccaccaaactcatggt  
gaaatttgatcccaatgtggcagtggtgggaggtggggccta--gtgggaggtggttgggtcatgggggagatccc  
tcatgaatggcttgggtgctgttctcatggtagtgagtgagtgagttctcactctcanragactggattagttctcgta  
ggaatggattagttcccatgagagtggttgttataaagccaggatgcccctcagggttttg-cctctttgcacgtgtc  
cacttcccctttgaccttctctgccatggtatgatgcagcatgaaagccctcaccagaagccagggccatgccccttga  
acttcc-----cagcctgcagaacctgagctaaataaacctcttttctttataaattaccagctctcaggtattc  
tggtatagcaacacaaaatggactaagaca-----  
-----

>Human

GTTGATATTCCAGAGAAGTTCTCTGAGATGTCAGAATCT---TCAACAATCAATTATTCATTTAACAAAACATAACTT  
AA----AAAAA---TTAA---GGTTA---tgctatgggttgggatatgggtggttgc--cccaccaaatttcatggt  
gaaatttcgtaccagtggtggtggtggtgagaagcagggataa--gtgggaggtggttagggtaaatgggagtgatccc  
acatgaatgggttgggtgcccattctcttggtagtaact---gagtttttgcctctcacaagatggggttgggtcttatg  
ggaatgaaatagttcttttgagagtggttgttataaagccaggaaacatccgggttgggtcctcttcacatgtgcc  
tgcttctcctttgaccttttctgccatggtttga-gcagcaaaaaggctctcaccagaagccaagcagacatgggtgc  
catgcctcttgtacagcctacagaactgtgagctaaataaacctcttt-----attagttaccagcctcaactattc  
ctttataacaatataaaatggactaaggca---ACTTG-----TATTAATGTGATTAAACTATG-----C  
CAAATTATACTATTTTATAAGTCTTGTAACCCCTGAATGCATGAGTTTACACAAATGCATTTTGAAAGAACT

>Chimp

GTTGATATTCCAGAGAAGTTCTCTGAGATGTCAGAATCT---TCAACAATCAATTATTCATTTAACAAAACATAACTT  
AA----AAAAA---TTAA---GGTTA---tgctatgggttgggatatgggtggttgc--cccaccaaatttcatggt  
gaaatttcataccagtggtggtggtggtgagaagcagggataa--gtgggaggtggttagggtaaatgggagtgatccc  
acatgaatgggttgggtgcccattctcttggtagtaact---gagtttttgcctctcacaagatggggttgggtcttatg  
ggaatgaaatagttcttttgagagtggttgttataaagccaggaaacatctgggttgggtcctcttcacatgtgcc  
tgcttctcctttgaccttttctgccatggtttga-gcagcaaaaaggctctcaccagaagccaagcagacatgggtgc  
catgcctcttgtacagcctacagaactgtgagctaaataaacctcttt-----attagttaccagcctcaactattc  
ctttataacaatataaaatggaccaaggca---ACTTG-----TATTAATGTGATTAAACTATG-----C  
CAAATTATACTATTTTATAAGTCTTGTAACCCCTGAATGCATGAGTTTACACAAATGCATTTTGAAAGAACT

>Orangutan

GTTGATATTCCAGAGAAGTTCTCTGAGATGTCAGAATCT---TCAACAATCAATTATTCATTTAGCAAAAACATAATTT  
TT----AAAAA---TTAA---GGTTA---tgctatgggttgggatatgggtggttgc--cccaccaaatttcatggt  
gaaatttggtaccagtggtggtggtggtgagaagcagggataaaaagtgggaggtggttagggtaaatgggggtgaaatccc  
acatgaatgggttgggtgcccattctcttggtagtaact---gagtttttgcctctcacaagacggggttgggtcttatg  
ggaatgaaatagttcttttgagagtggttgttataaagccaggaaacatccgggttgggtcctcttcacatgtgcc  
tgcttctcctttgaccttttctgccatggtttga-acagcataaaggctctaaccagaagccaagcagacatgggtgc  
catgcctcttgtacagcctacagaactgtgagctaaataaacctcttt-----attagttaccagcctcaagtattc  
cttcataacaatataaaatggaccaaggca---ACTTG-----TATTAATGTGATTAAATAATG-----C  
CAAATTATACTATTTTATAAGTCTTGTAACCCCTGAATGCATGAGTTTACACAAATGCATTTTGAAAGAACT

>Baboon

GTTGATATTCCAGAGAAGTTCTCTGAGATGTCAGCATCT---TCAGCAATCAATTATTCATTTAGCAAAAACAT---TA  
AA----AAAAA---TTAA---GGTTA---tgctatgggttgggatatgggtggttgc--cccaccaaatttcatggt  
gaaatttggtaccagtggtggtggtggtgagaagcagggataa--gtgggaggtggttagggtaaatggaggtgaaatccc  
acatgaatgggttgggtgcccattctcttggtagtaact---gagtttttgcctctcacaagacggggttgggtcttacg  
ggaatgaaatagttctttcgagagtggttgttataaagccaggaaacatctgtggttgggtcctcttcacatgtgcc  
tgcttctcctttgaccttttctgccatggtttga-acagcataaaggctctcaccagaagccaagcagacatg-----  
-----tacagcctacagaactgtgggctaaataaacctcttt-----attagttaccaggtcaagtattc  
ctttaaaacagatataaaatggaccaaggca---ACTTC-----TATTAATGTGATTAAATTATG-----C  
CAAATTATACTATTTTATAAGTCTTGTAACCCCTGAATGCATGAGTTTACACAAATGCATTTTGAAAGAACT

>Rhesus

GTTGATATTCCAGAGAAGTTCTCTGAGATGTCAGCATCT---TCAGCAATCAATTATTCATTTAGCAAAAACATCATT  
AA----AAAAA---TTAA---GGTTA---tgctatgggttgggatatgggtggttgc--cccaccaaatttcatggt  
gaaatttggtaccagtggtggtggtggtgagaagcagggataa--gtgggaggtggttagggtaaatggaggtgaaatccc
